# Supplementary material for: Real-Time Musculoskeletal Kinematics and Dynamics Analysis Using Marker- and IMU-based Solutions in Rehabilitation
Source: Preprints.org preprint supplement (doi:10.20944/preprints202102.0202.v2), 2021-02-26

pelvis\_tilt

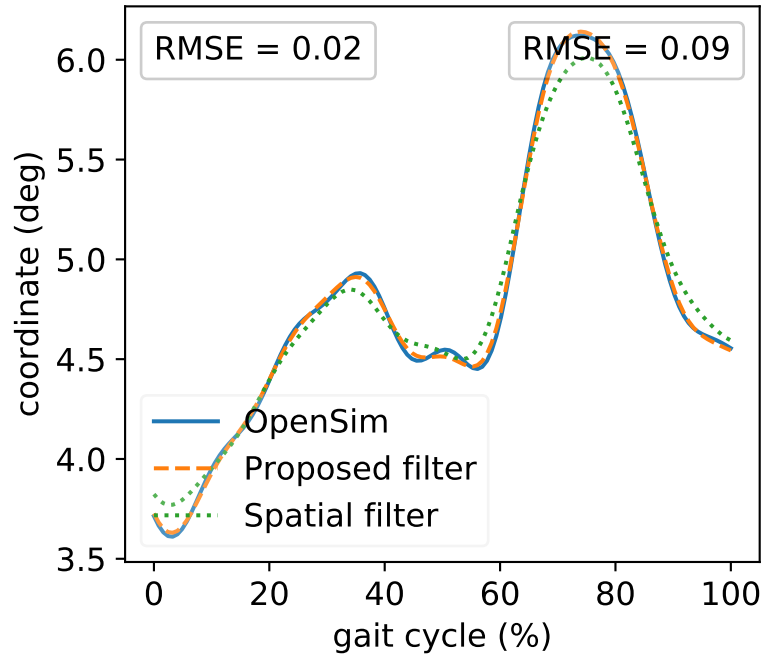

pelvis\_tilt

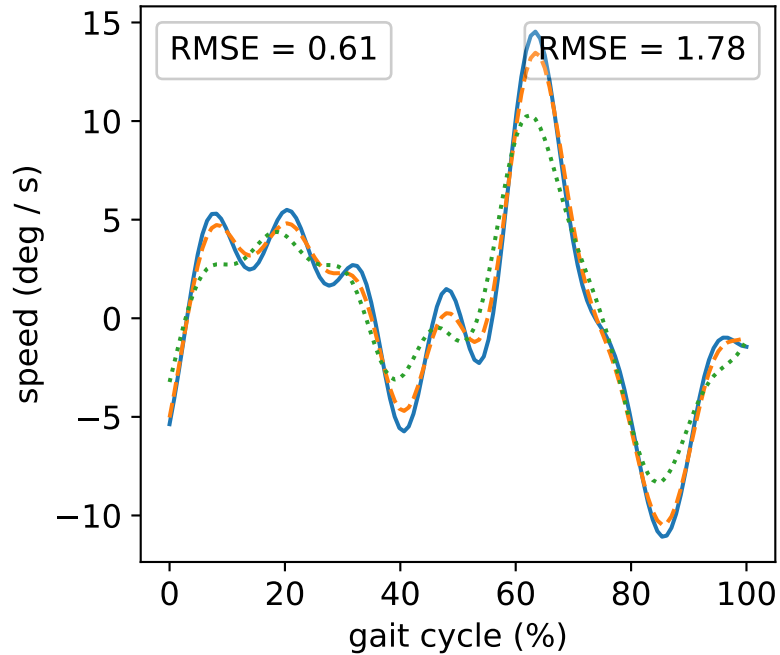

pelvis\_tilt

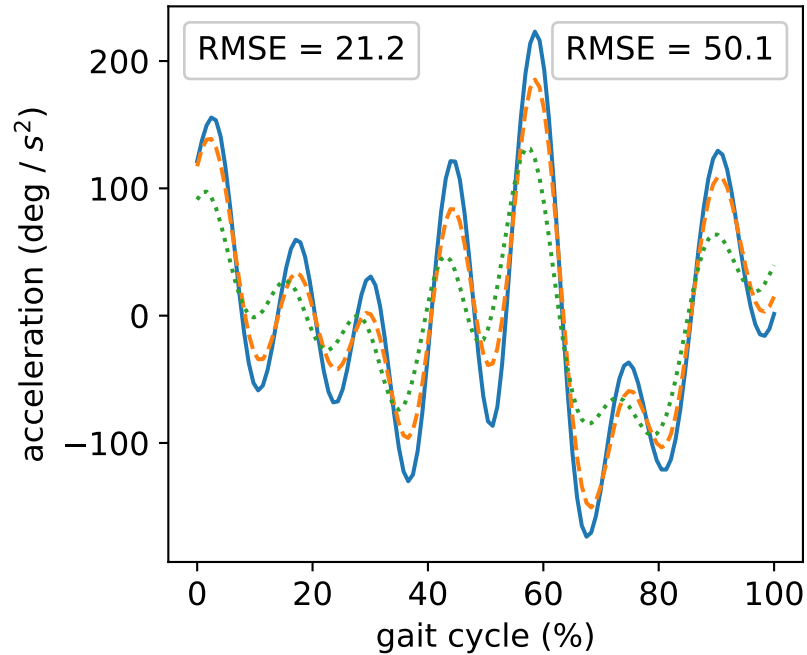

pelvis\_list

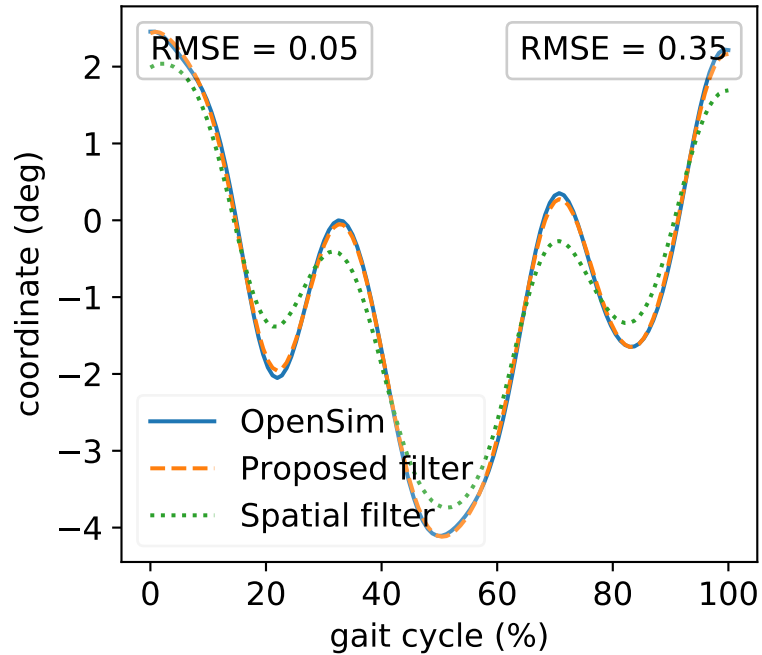

pelvis\_list

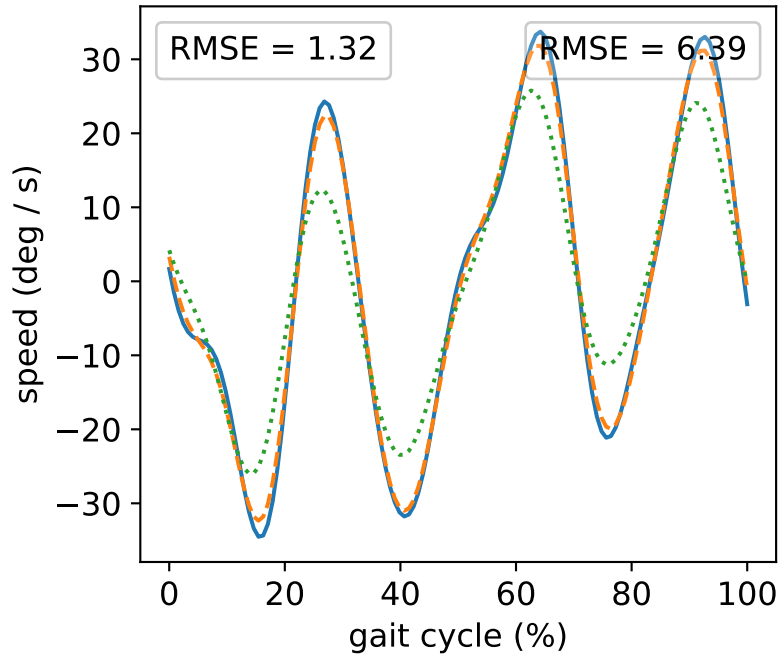

pelvis\_list

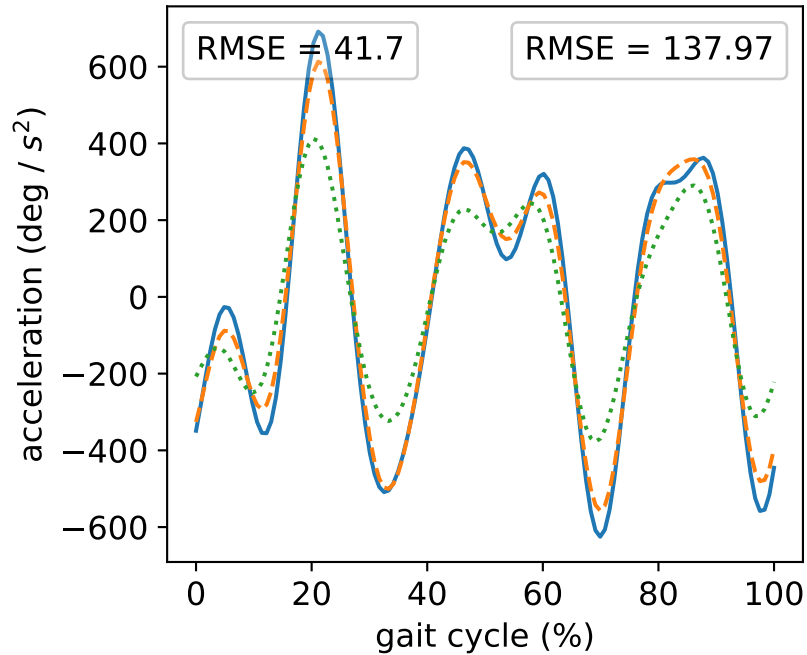

pelvis\_rotation

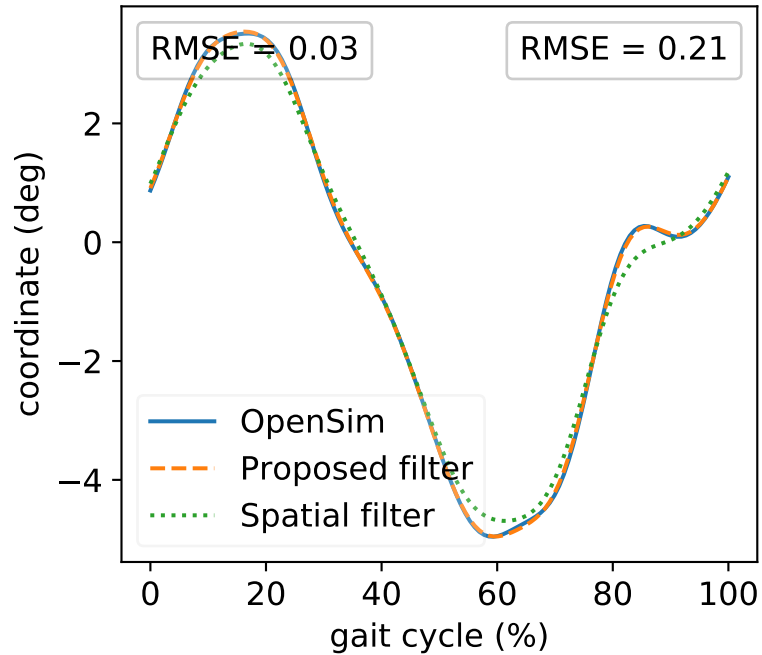

pelvis\_rotation

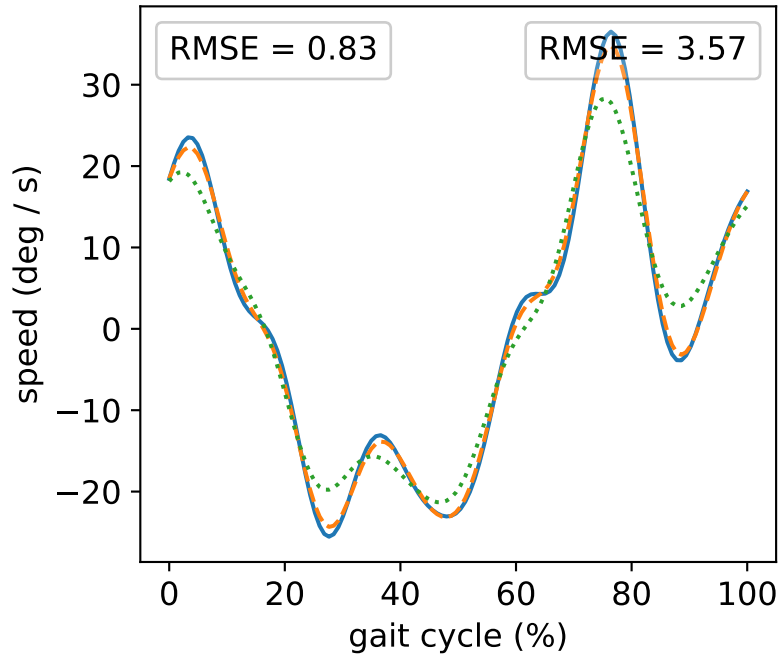

pelvis\_rotation

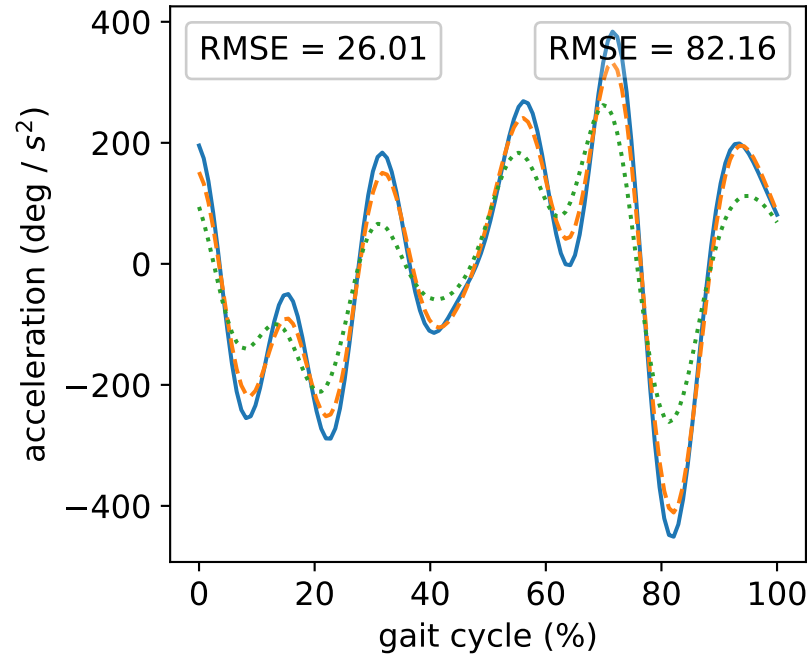

pelvis\_tx

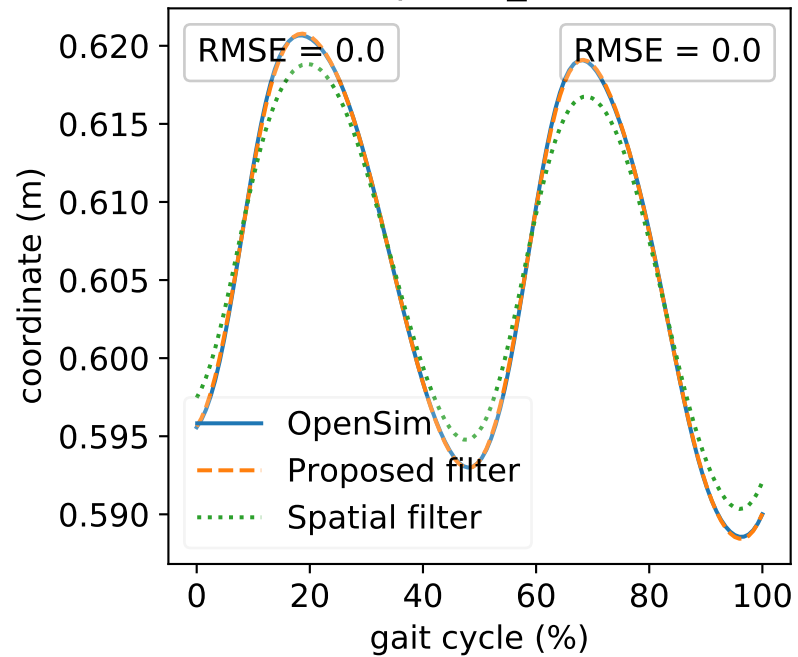

pelvis\_tx

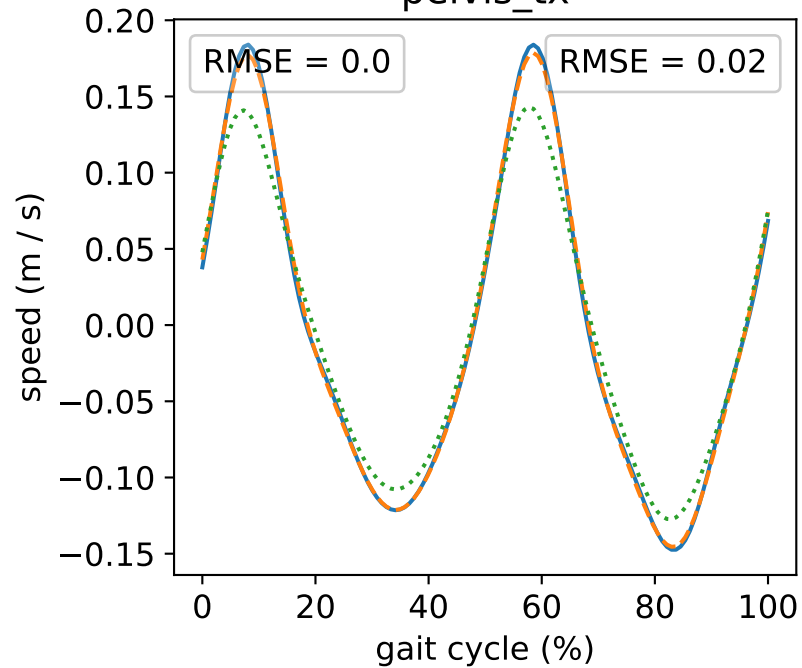

pelvis\_tx

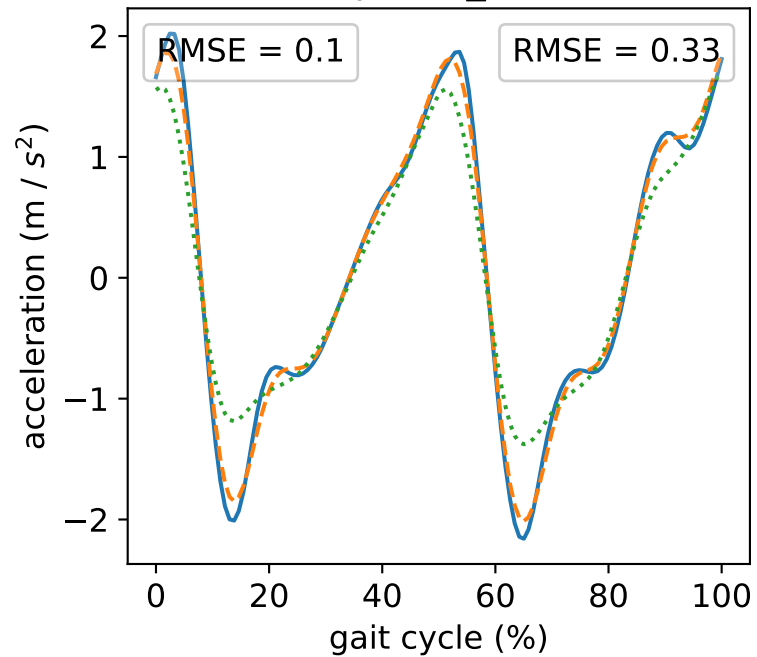

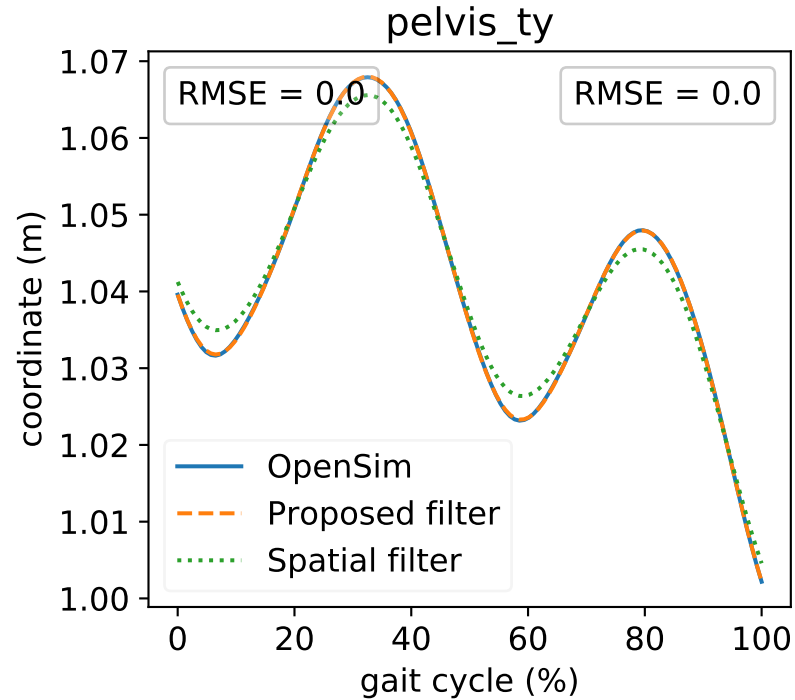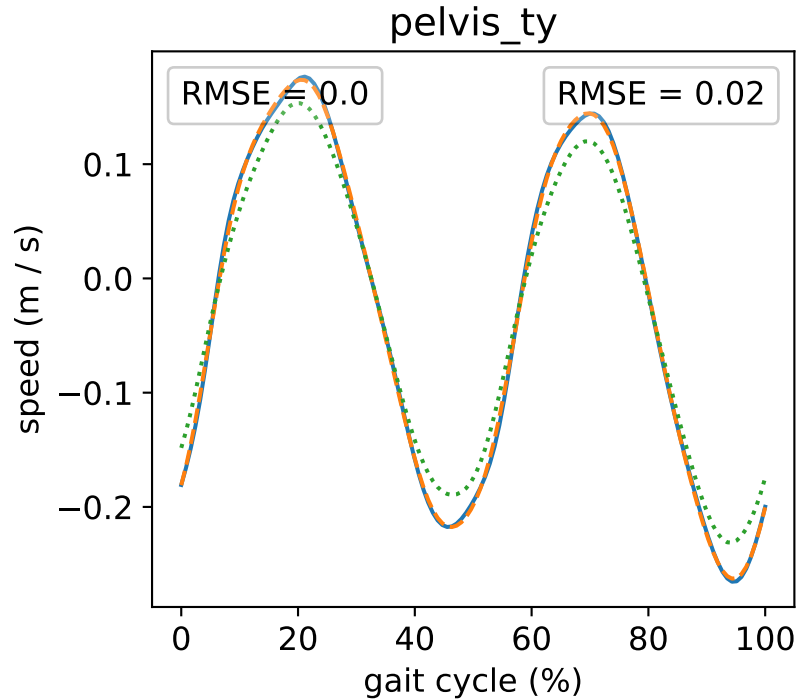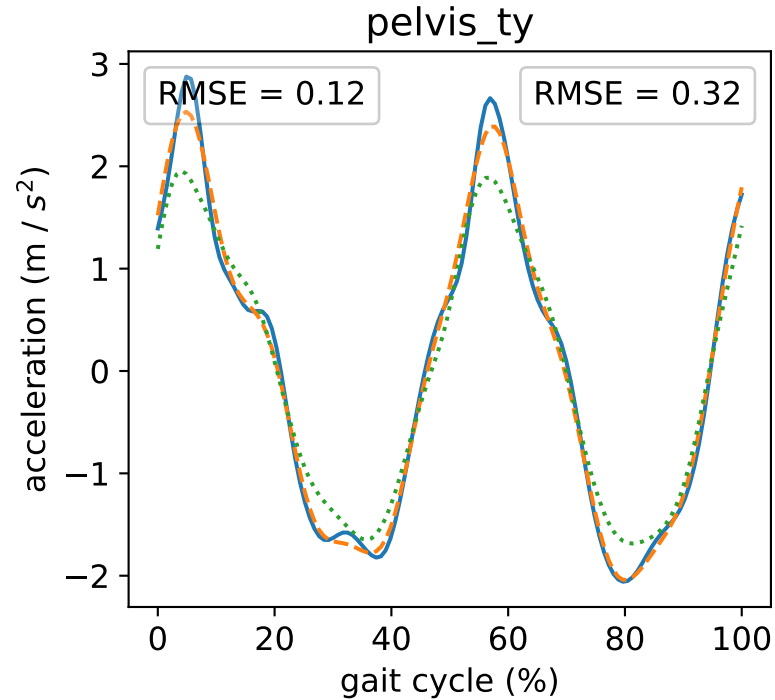

pelvis\_tz

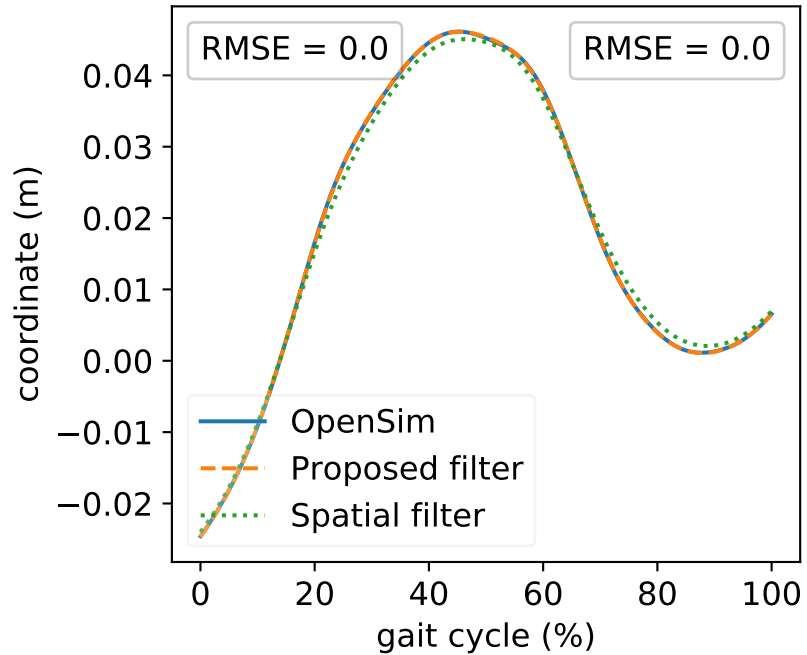

pelvis\_tz

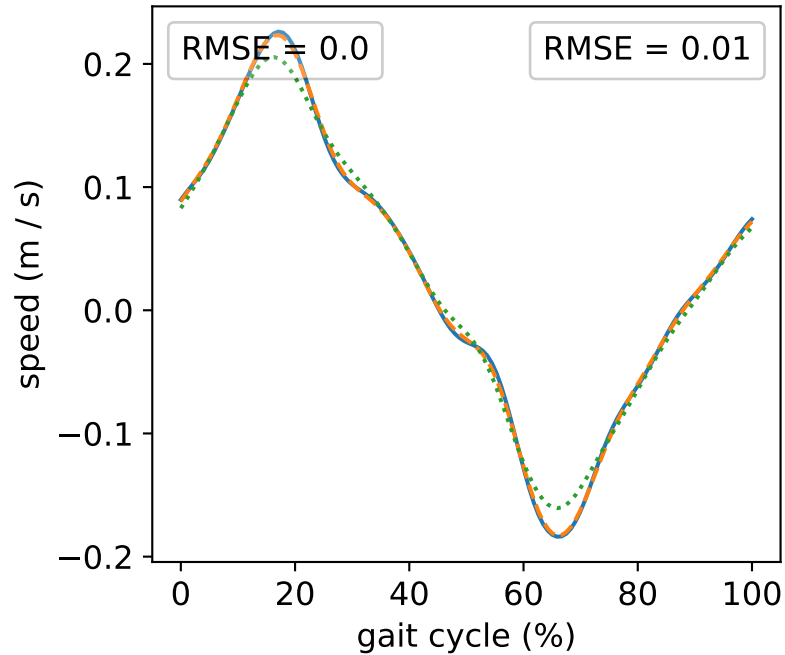

pelvis\_tz

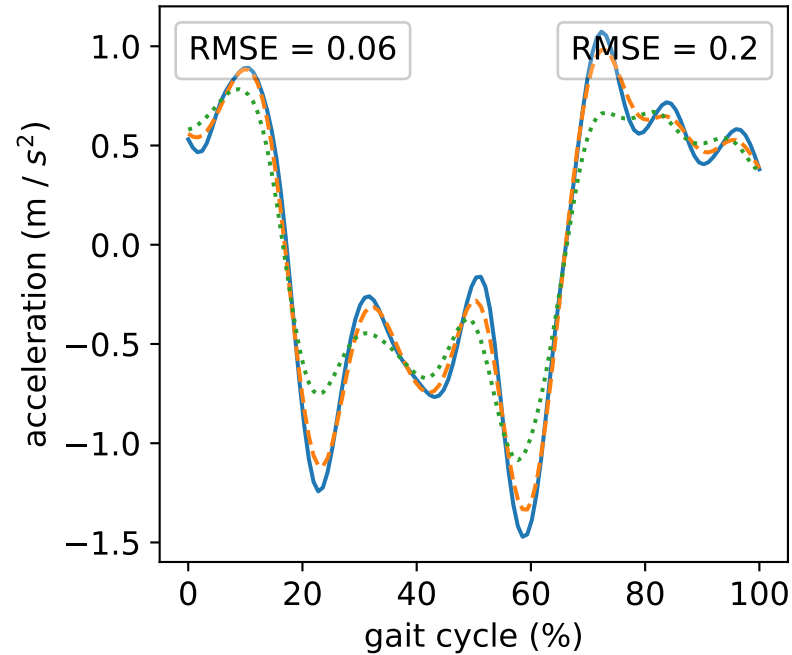

hip\_flexion\_r

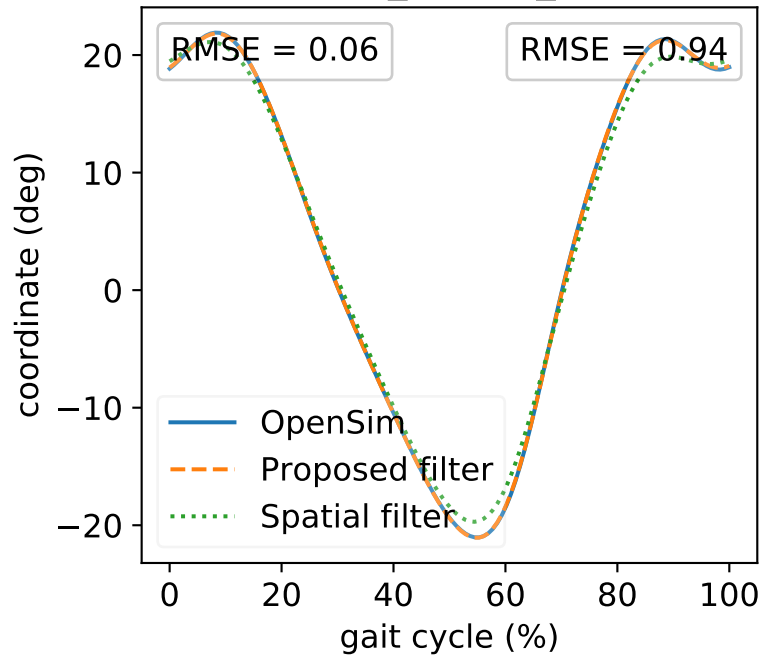

hip\_flexion\_r

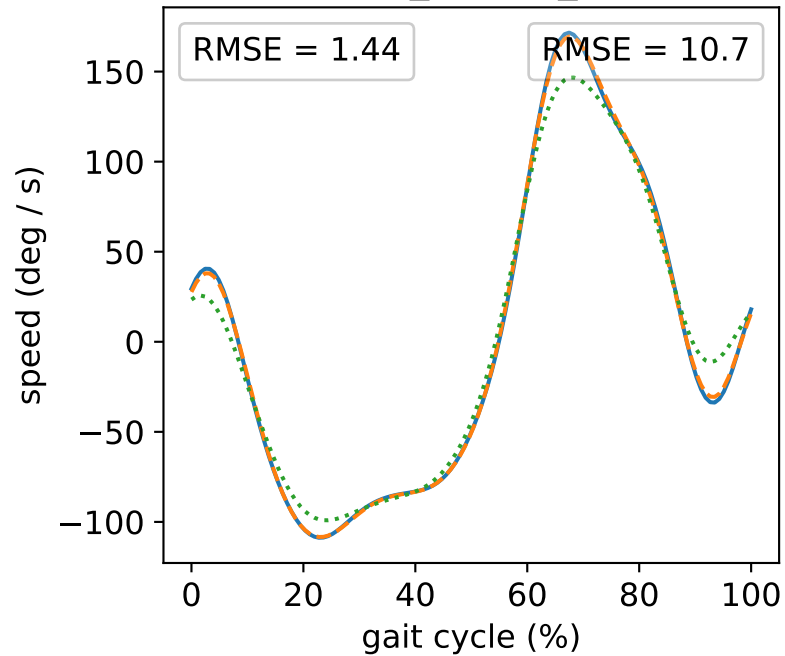

hip\_flexion\_r

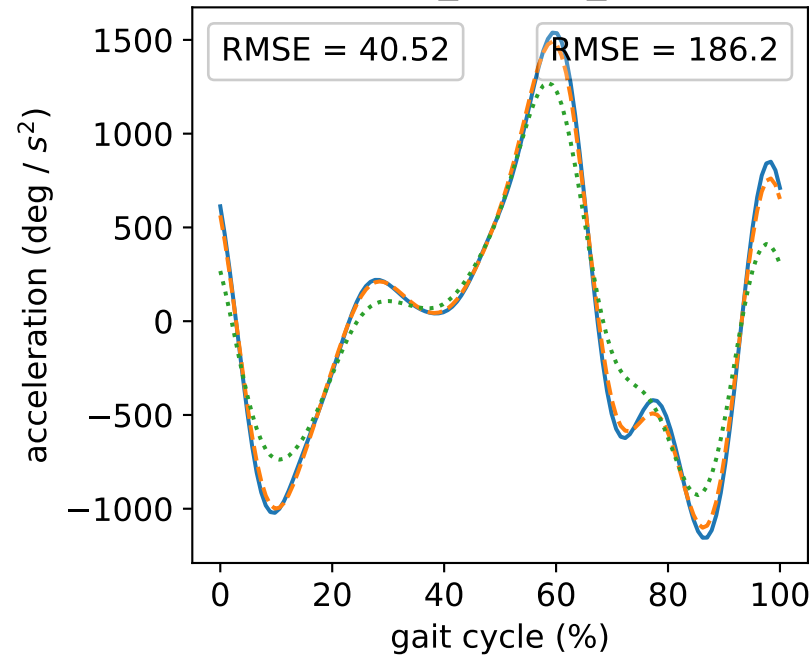

hip\_adduction\_r

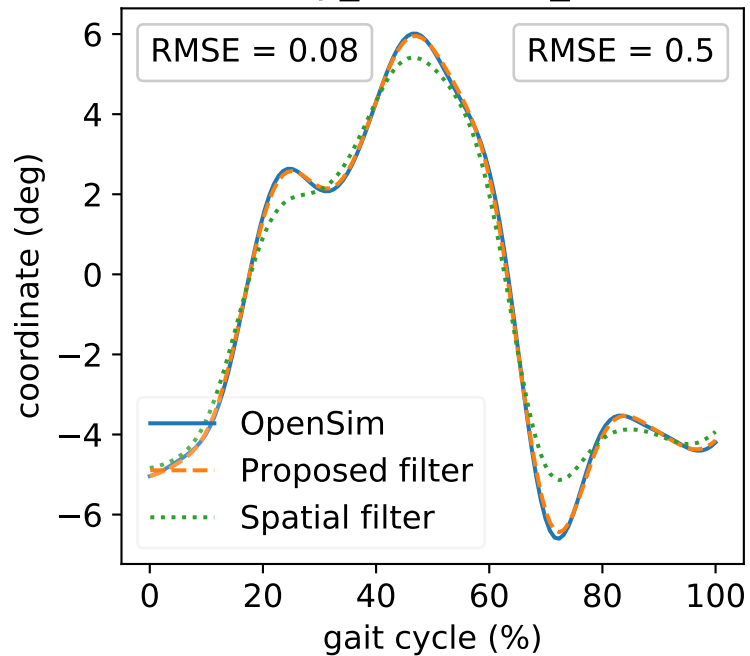

hip\_adduction\_r

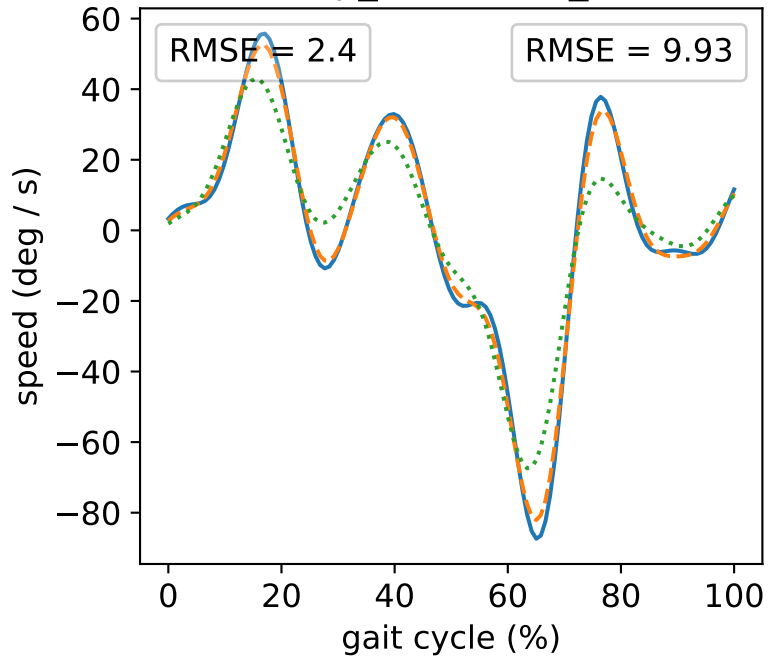

hip\_adduction\_r

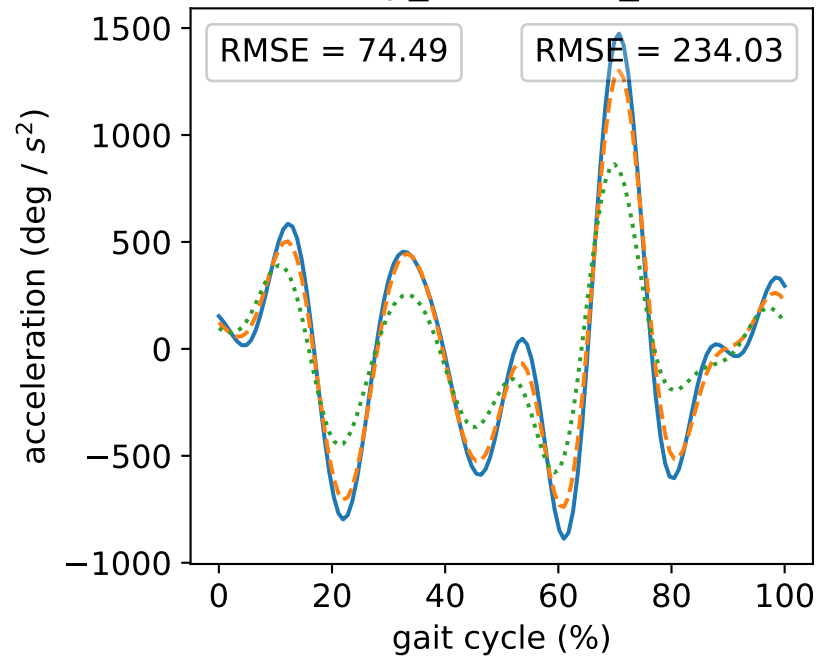



hip\_rotation\_r

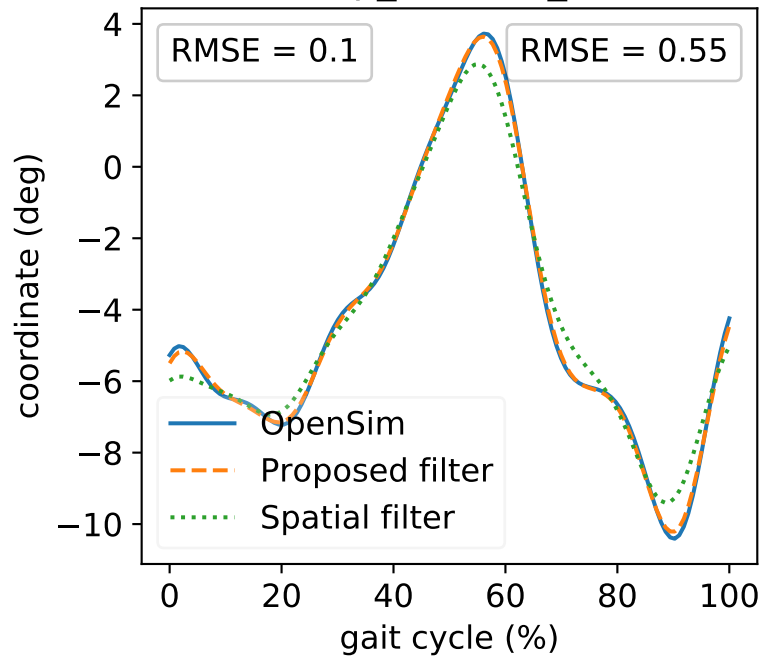

hip\_rotation\_r

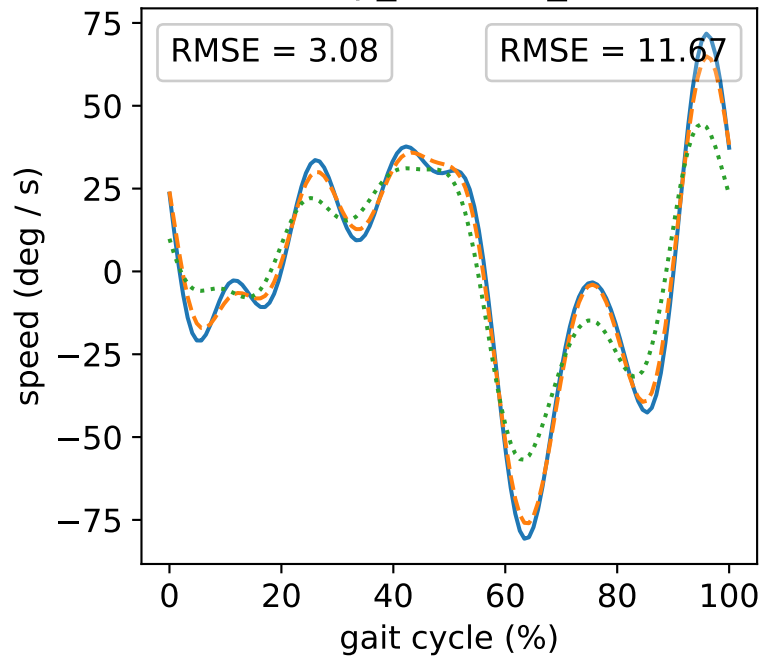

hip\_rotation\_r

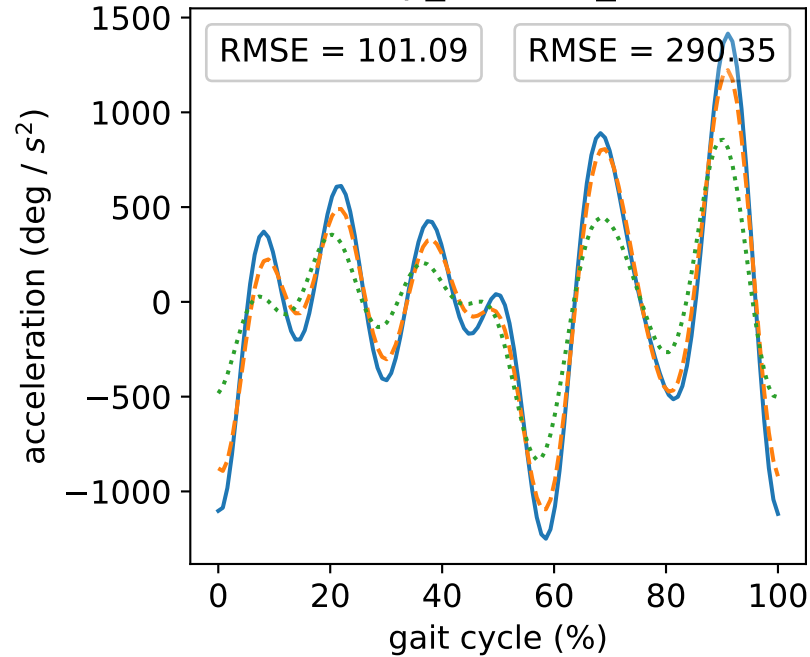

knee\_angle\_r

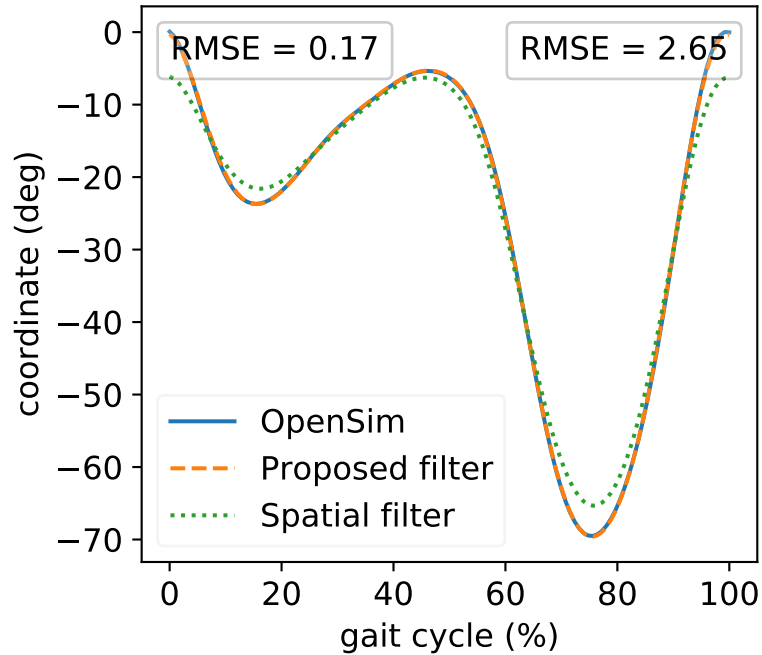

knee\_angle\_r

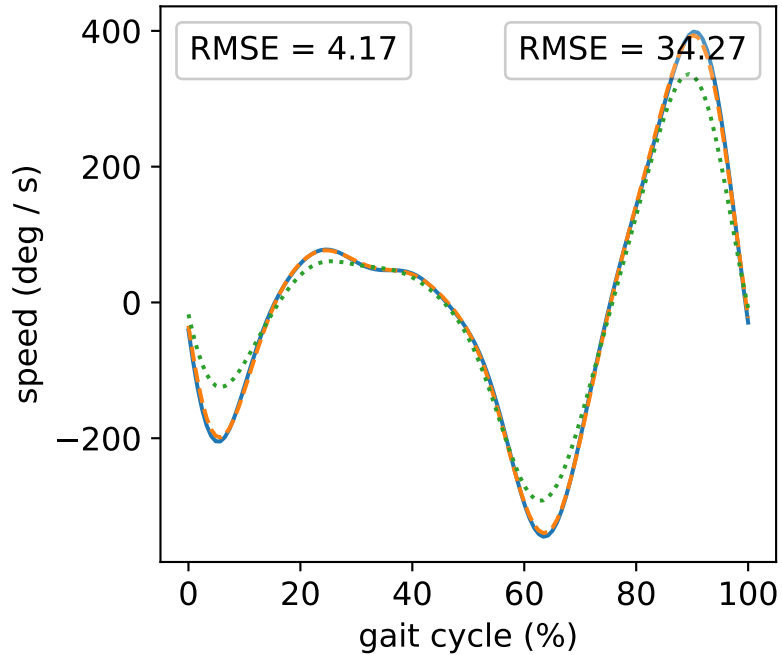

knee\_angle\_r

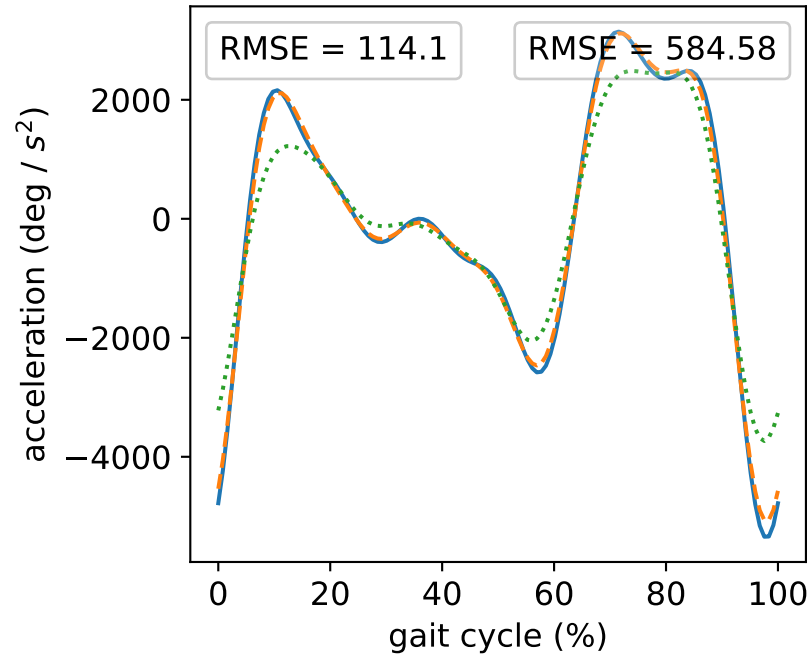

ankle\_angle\_r

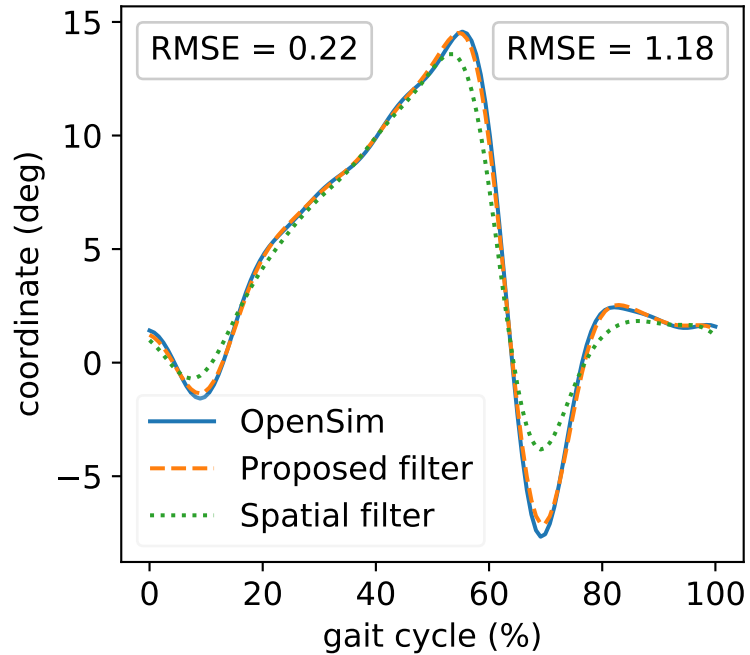

ankle\_angle\_r

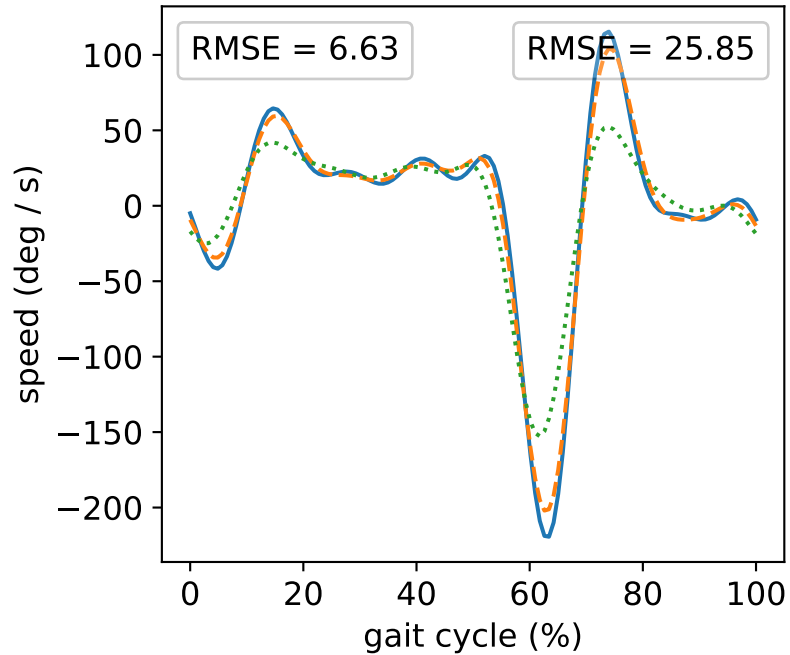

ankle\_angle\_r

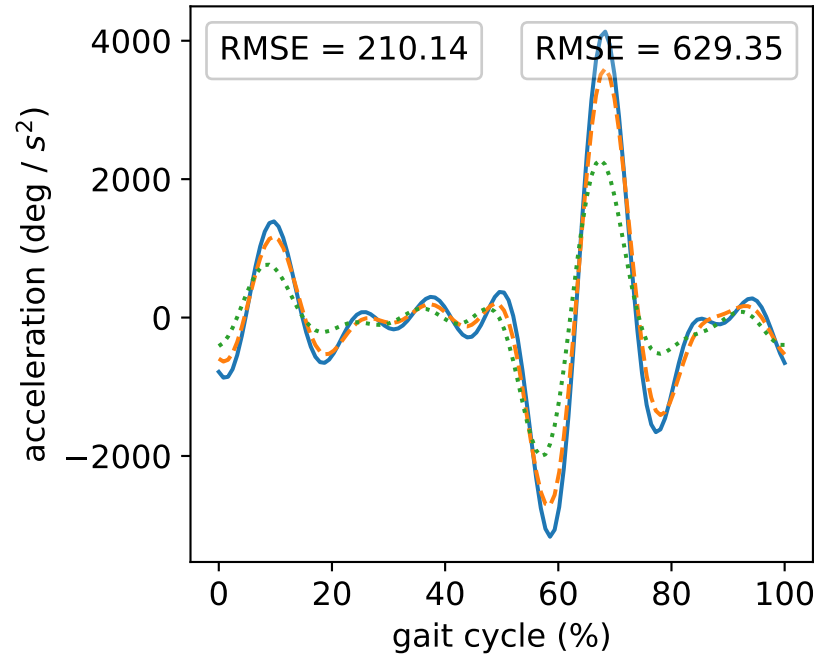

hip\_flexion\_l

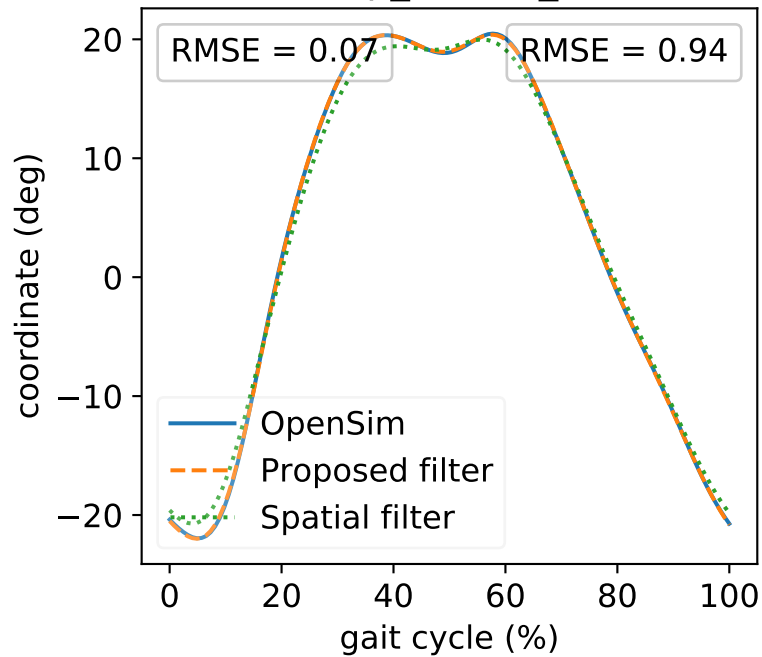

hip\_flexion\_l

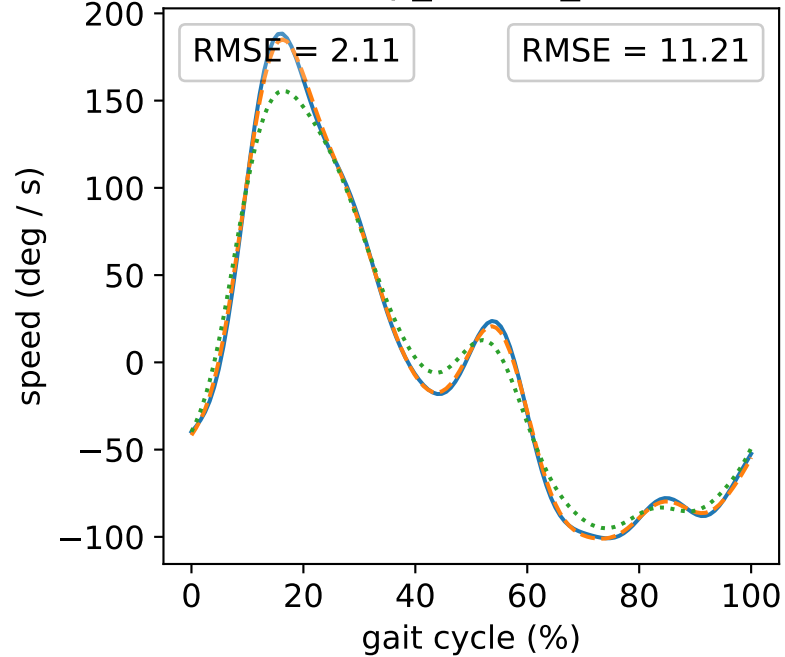

hip\_flexion\_l

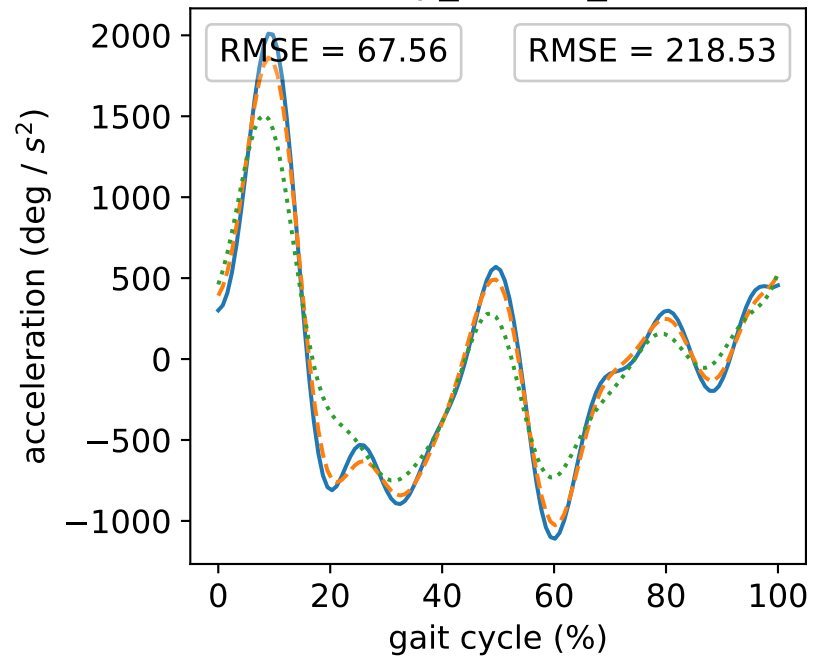

hip\_adduction\_l

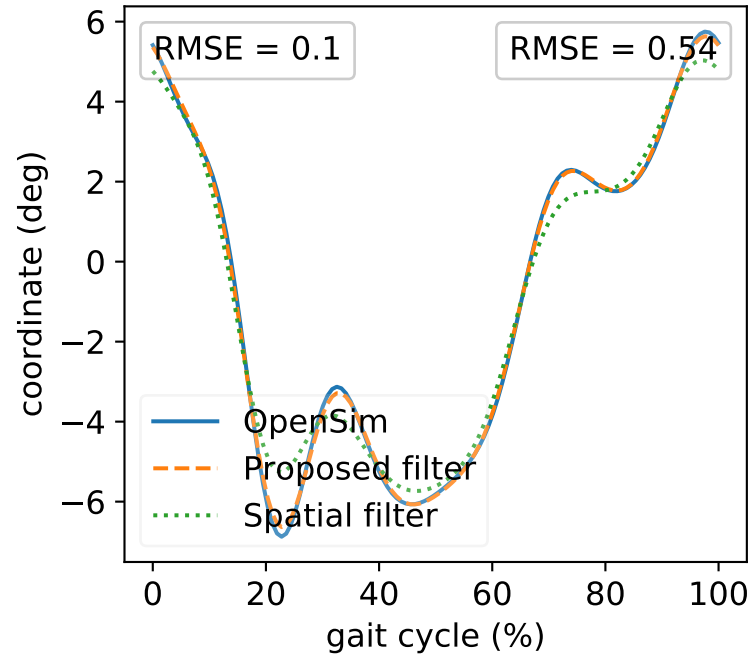

hip\_adduction\_l

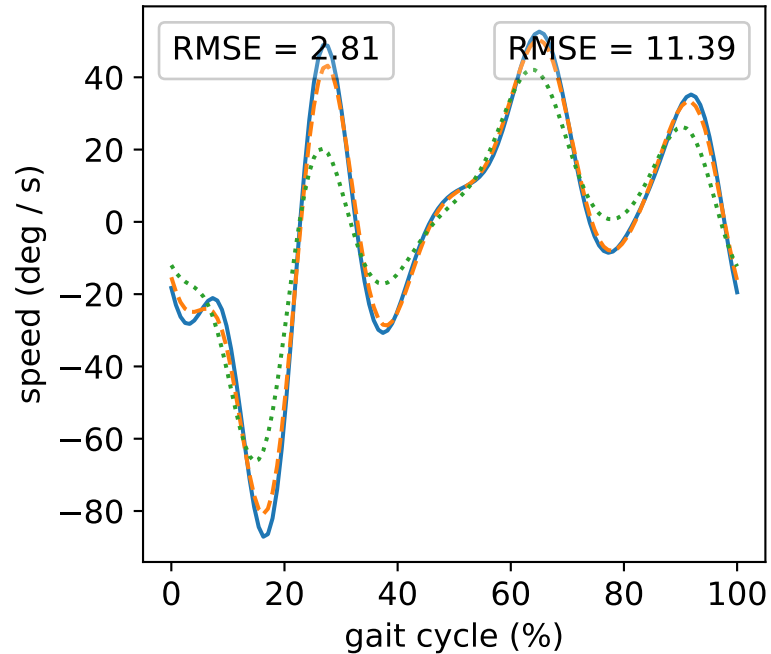

hip\_adduction\_l

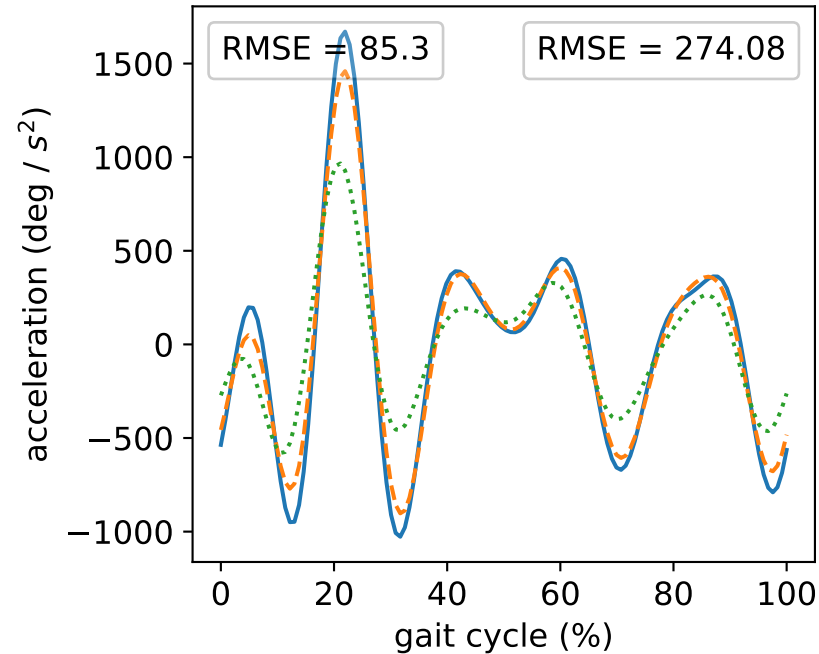

hip\_rotation\_l

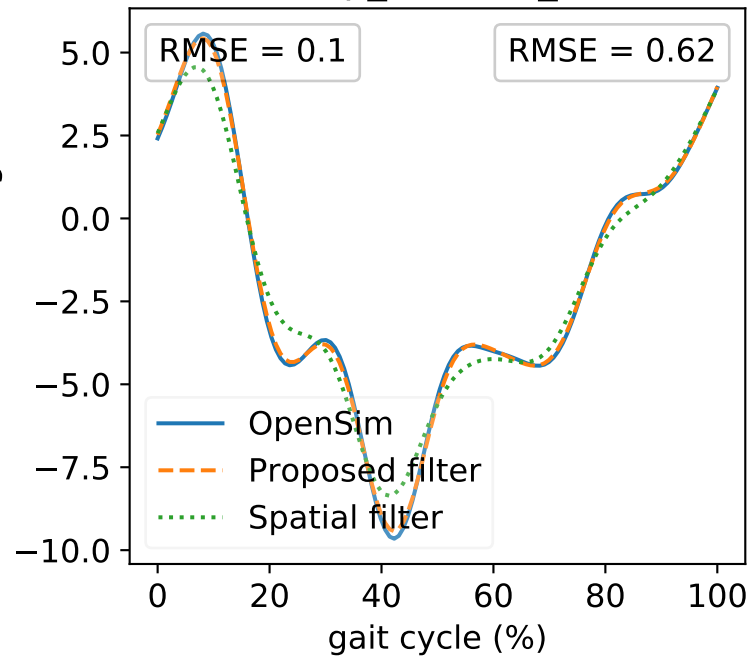

hip\_rotation\_l

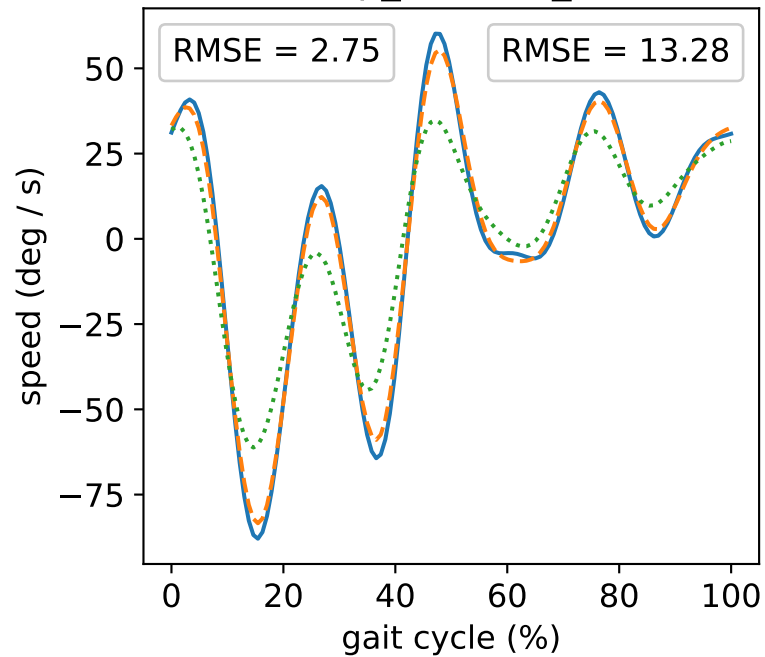

hip\_rotation\_l

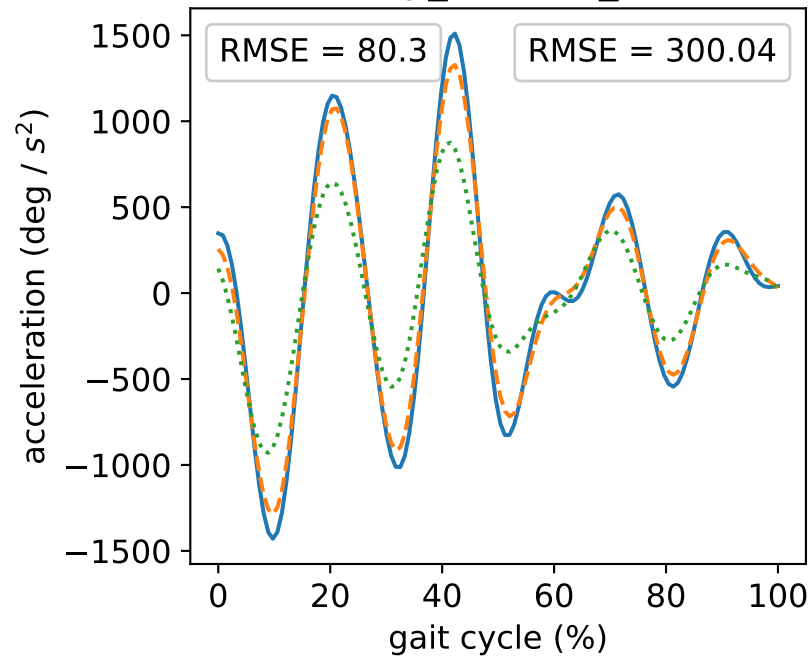

knee\_angle\_l

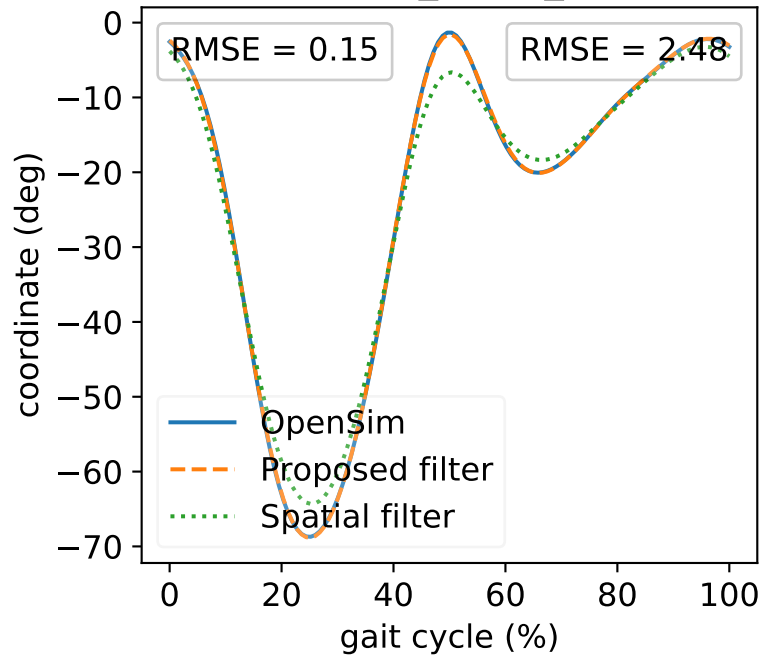

knee\_angle\_l

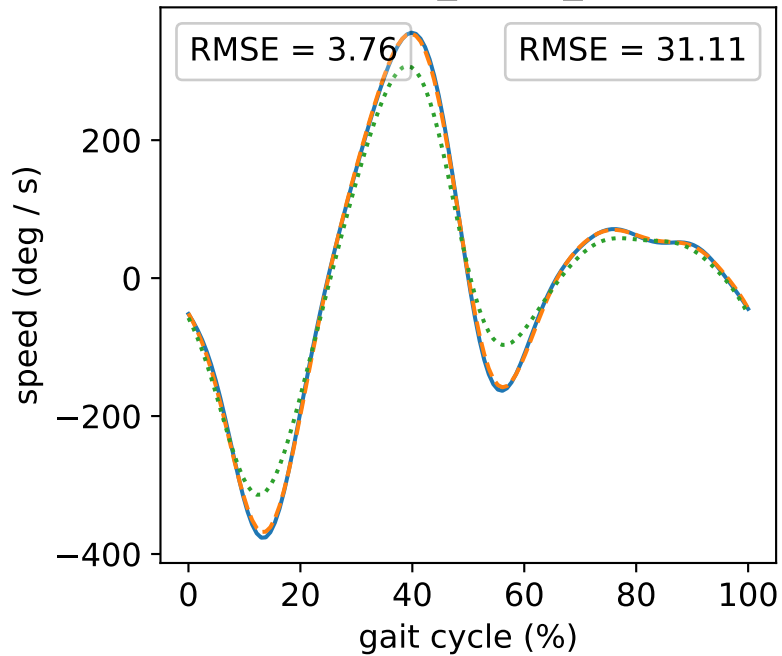

knee\_angle\_l

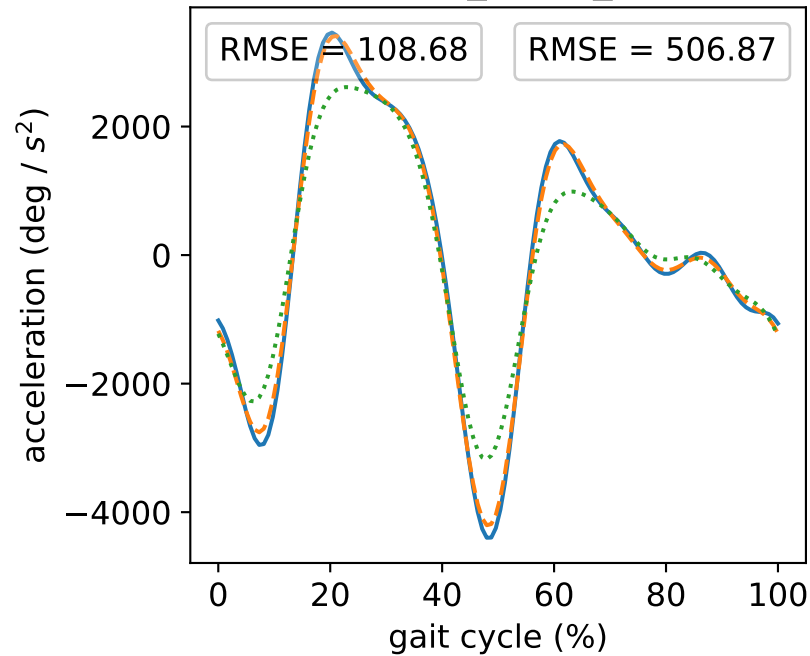

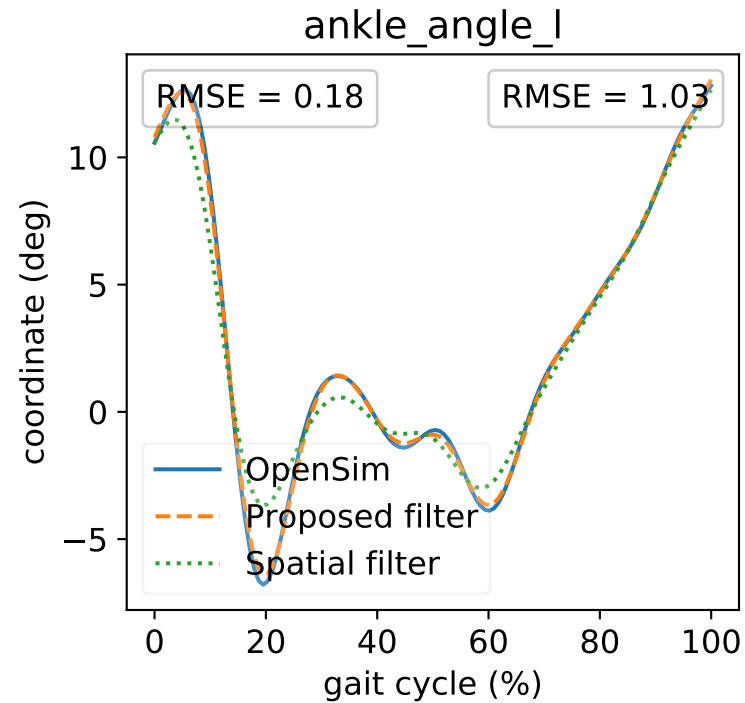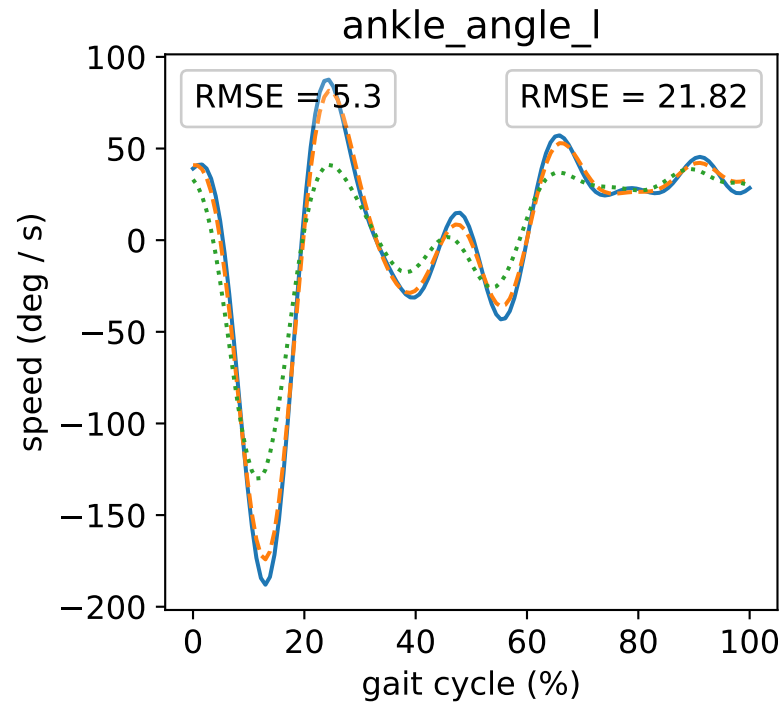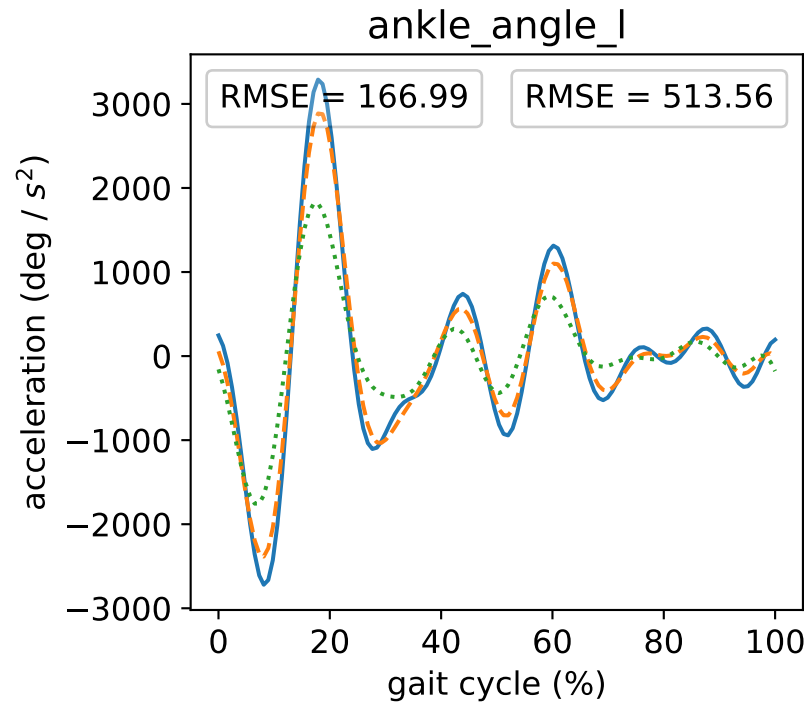



lumbar\_extension

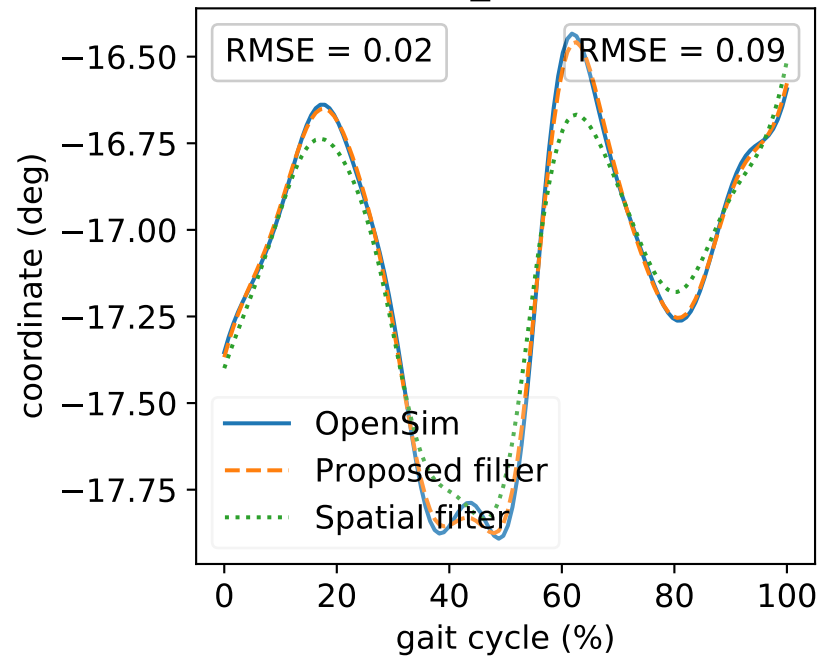

lumbar\_extension

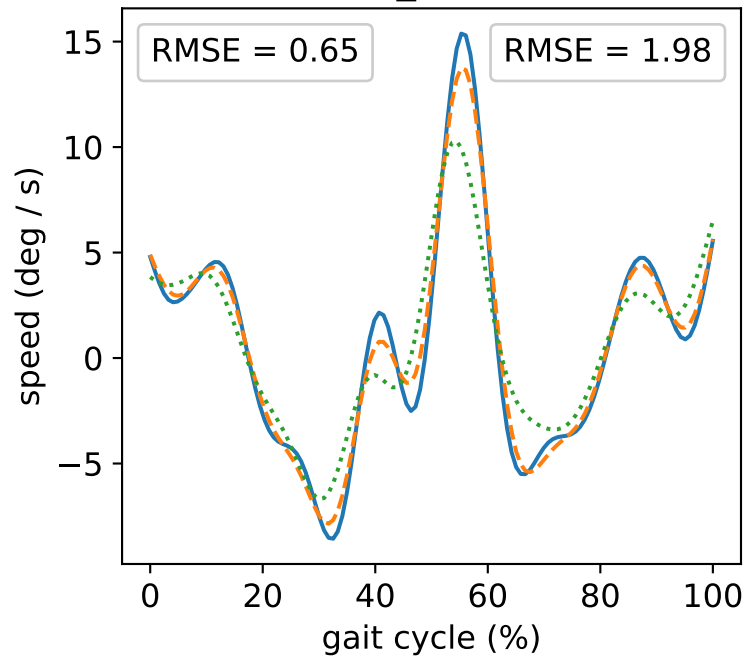

lumbar\_extension

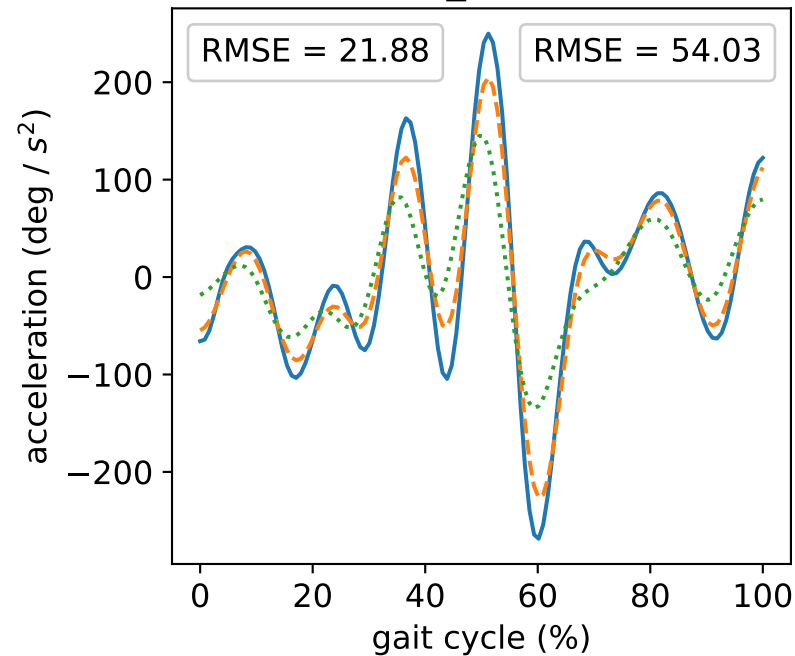

lumbar\_bending

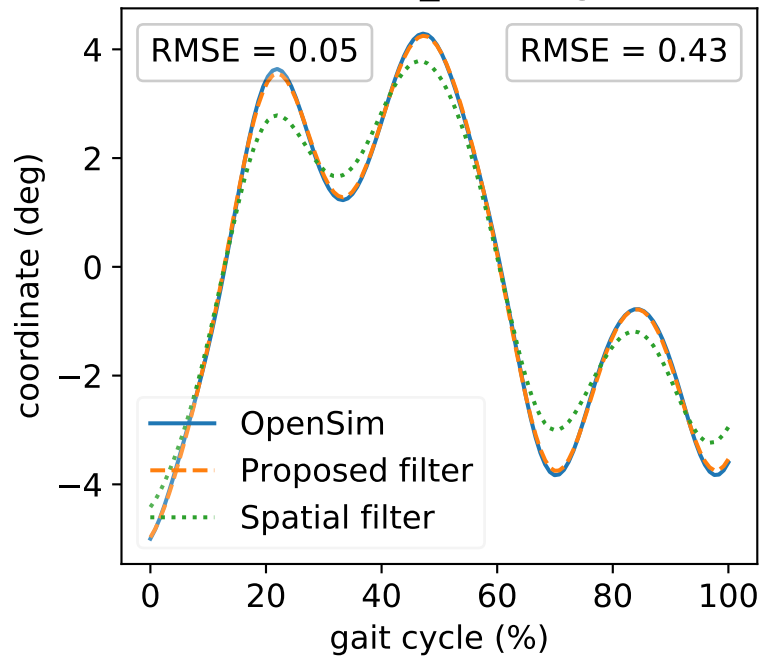

lumbar\_bending

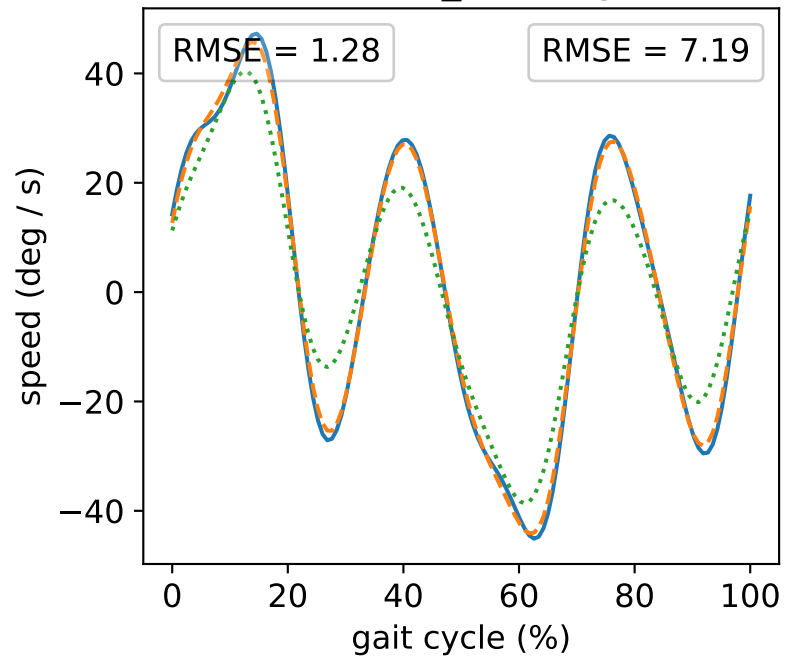

lumbar\_bending

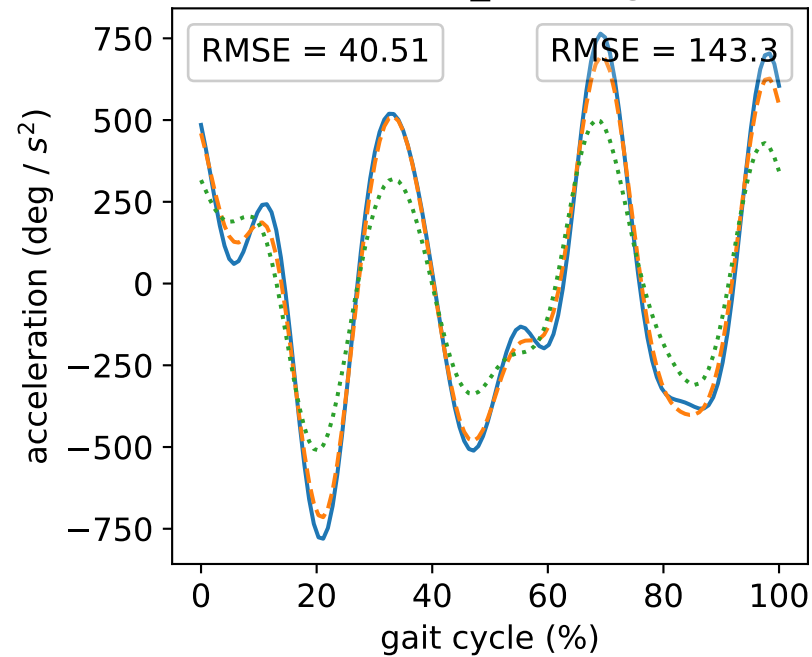

lumbar\_rotation

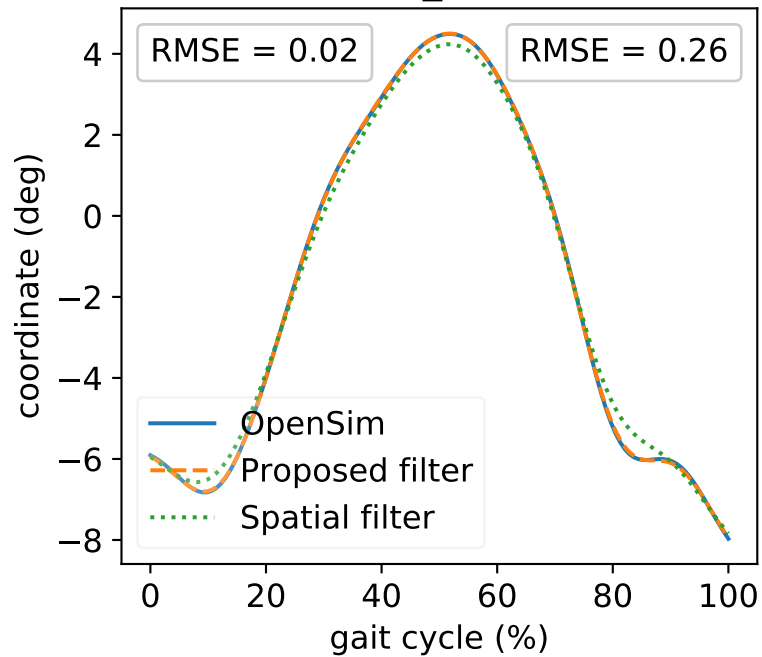

lumbar\_rotation

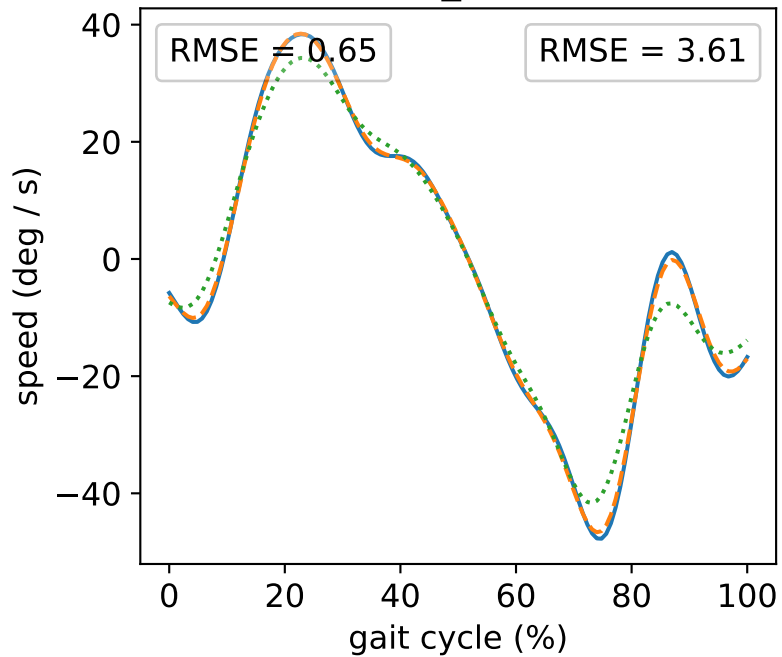

lumbar\_rotation

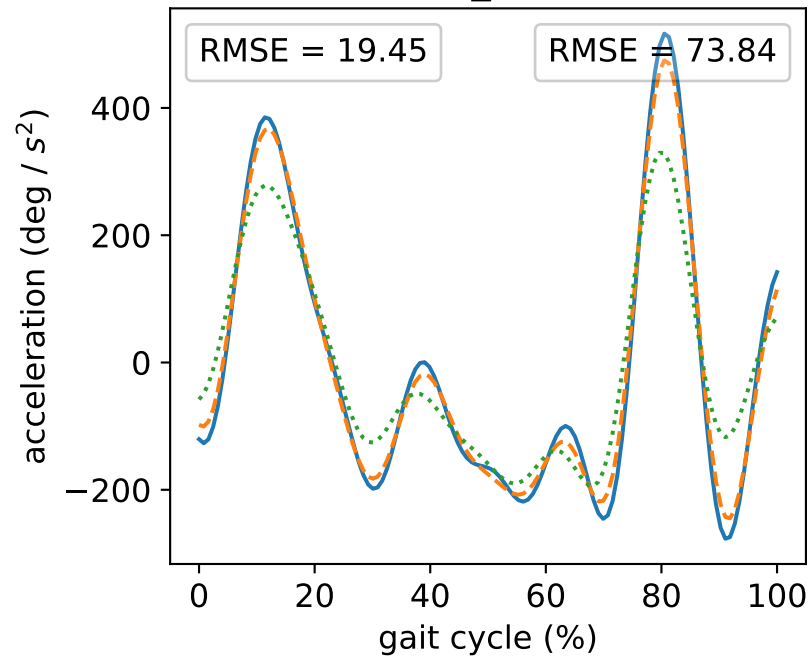

Supplement: Supplementary file 2 [file supplementary]
