# Supplementary material for: Real-Time Musculoskeletal Kinematics and Dynamics Analysis Using Marker- and IMU-based Solutions in Rehabilitation
Source: Preprints.org preprint supplement (doi:10.20944/preprints202102.0202.v2), 2021-02-26

# pelvis\_tilt

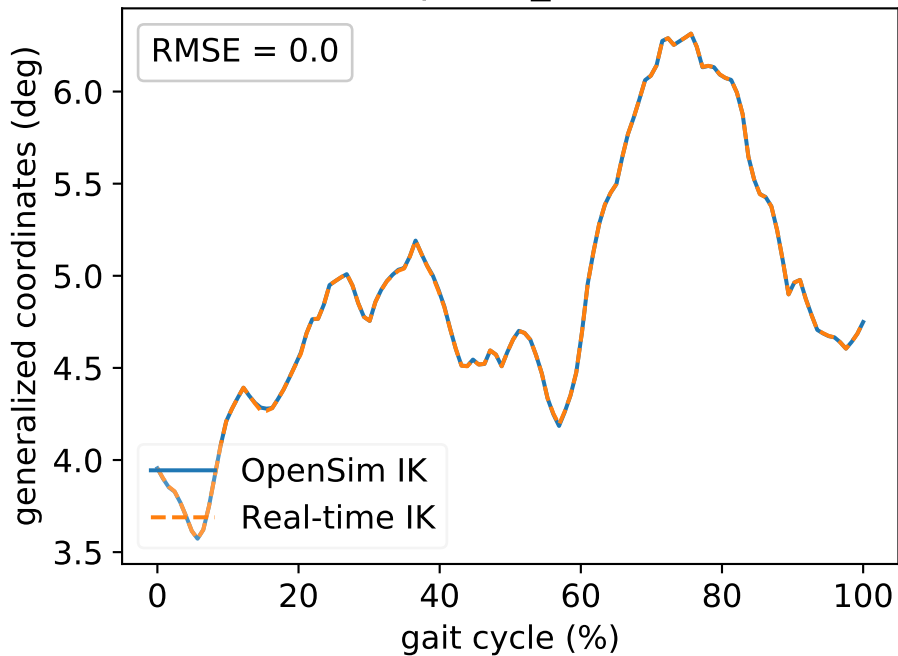

## pelvis\_list

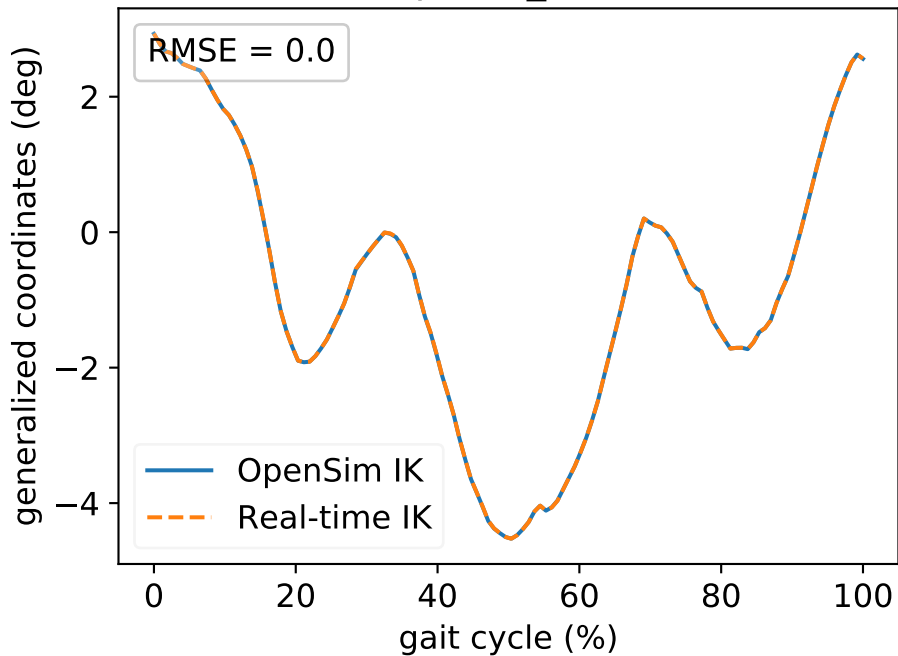

# pelvis\_rotation

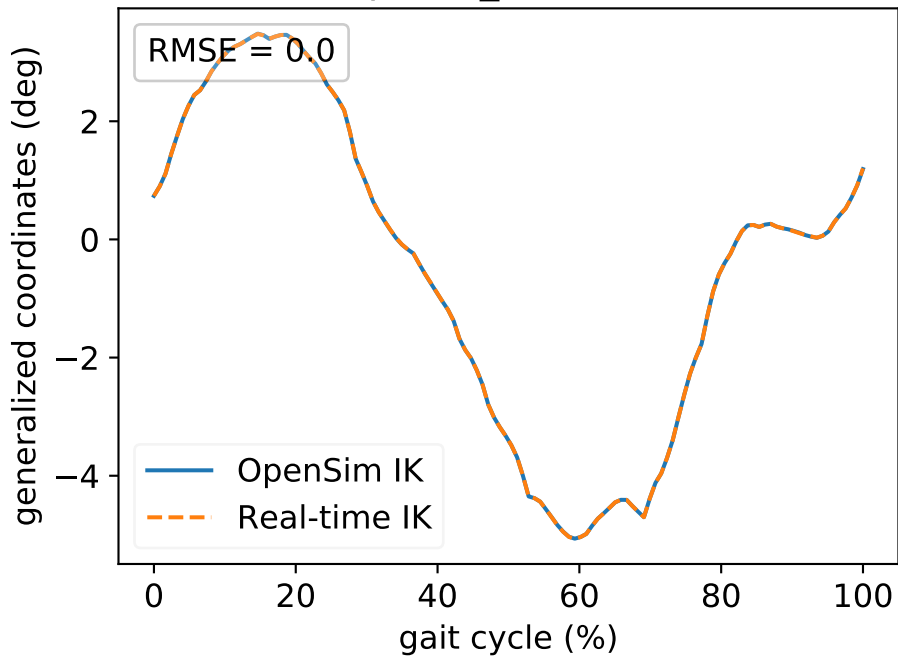

# pelvis\_tx

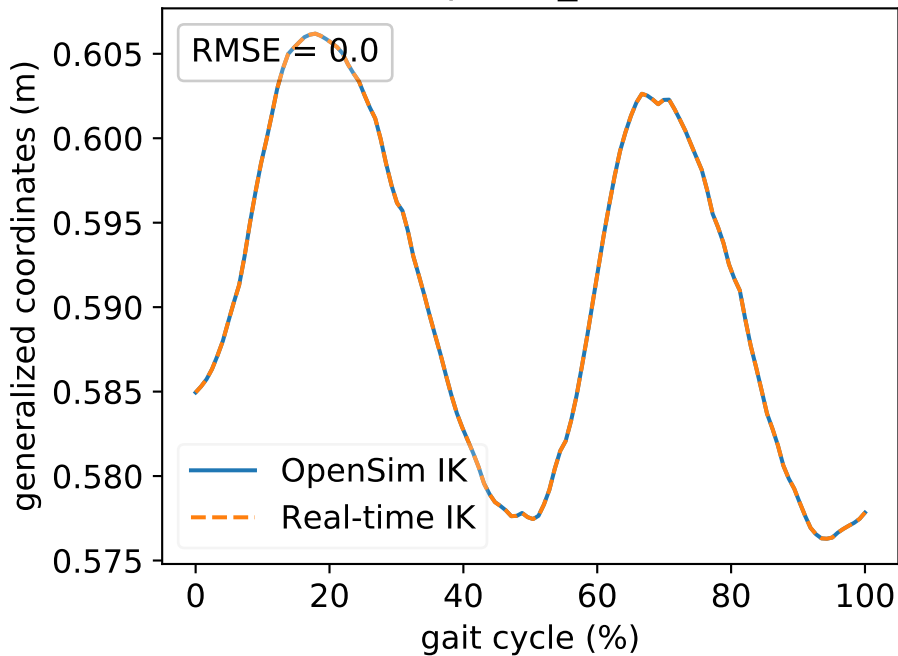

# pelvis\_ty

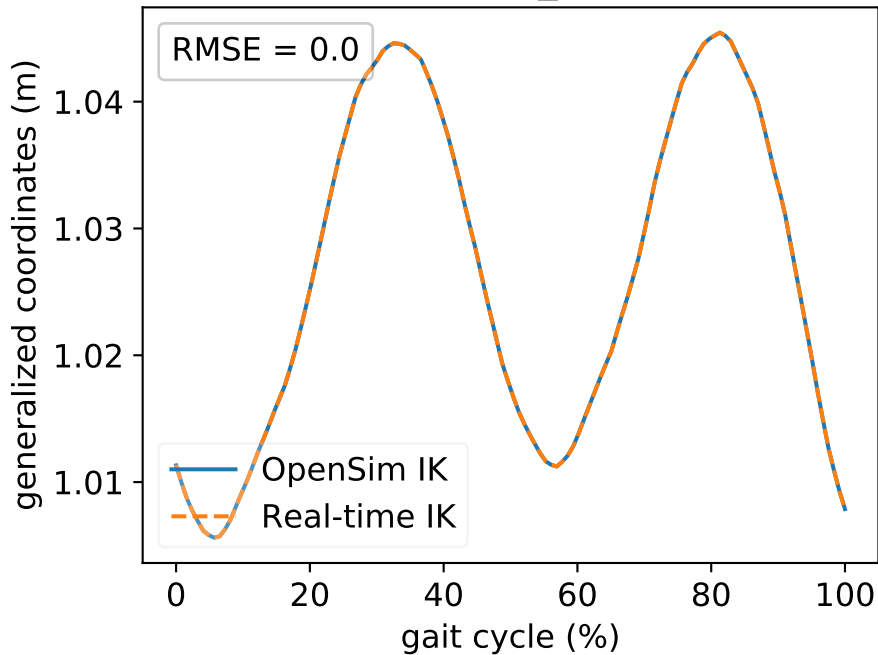

# pelvis\_tz

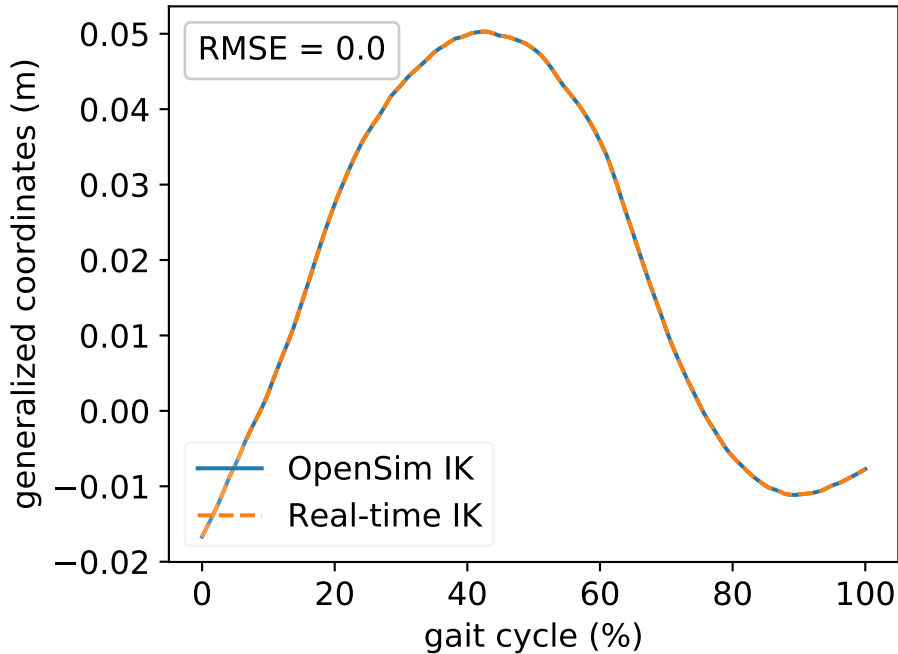

## hip\_flexion\_r

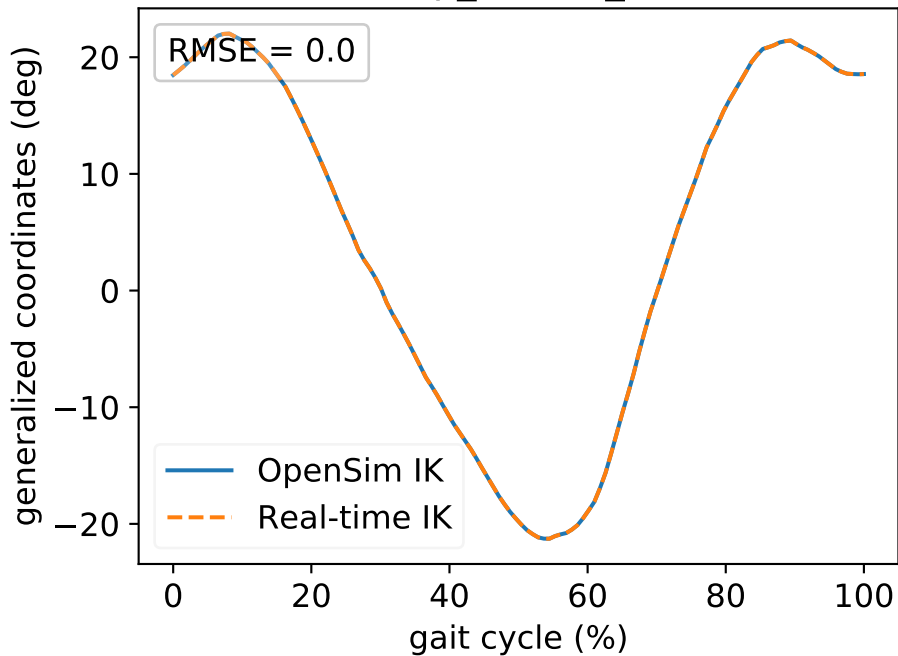

## hip\_adduction\_r

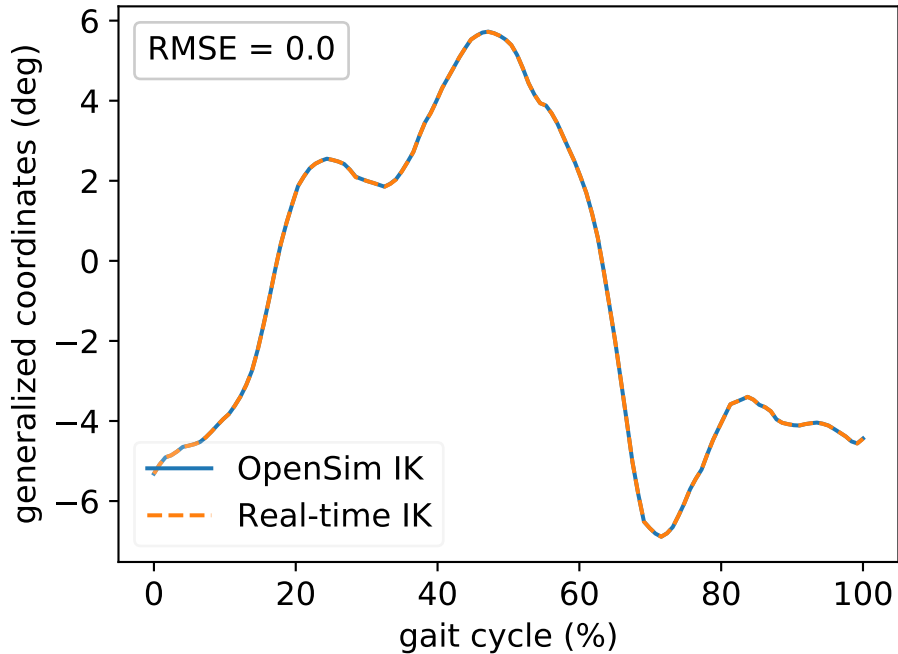



# hip\_rotation\_r

generalized coordinates (deg)

RMSE = 0.0

OpenSim IK  
Real-time IK

gait cycle (%)

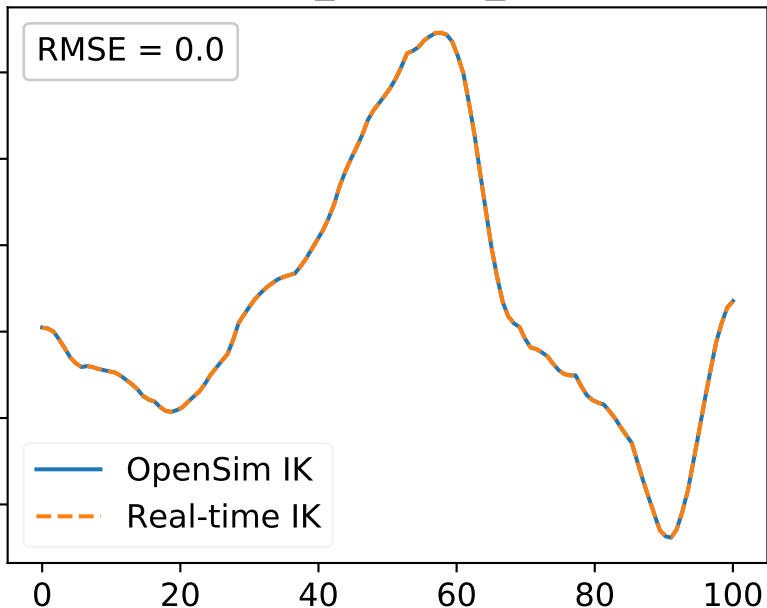

# knee\_angle\_r

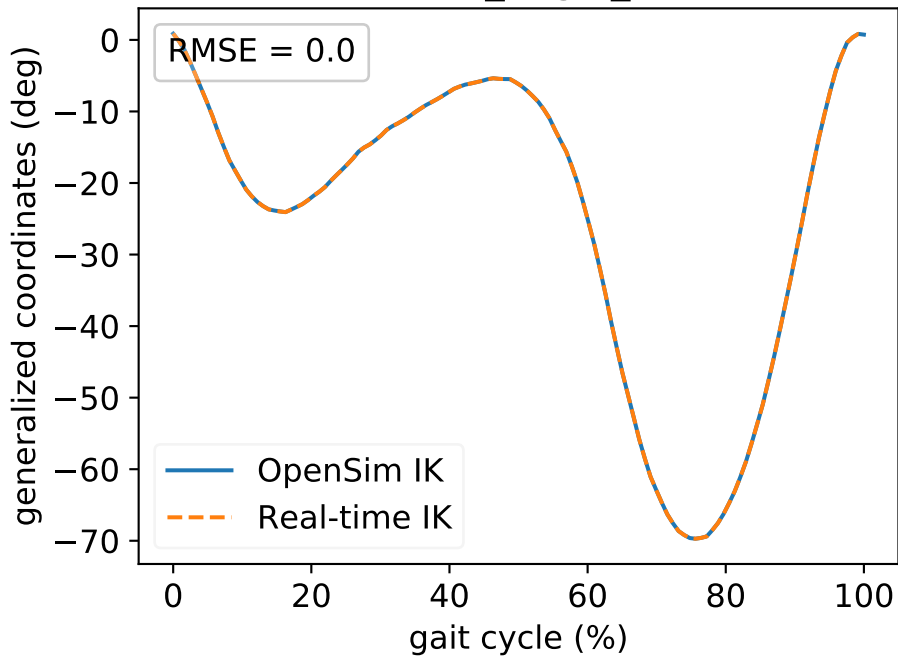

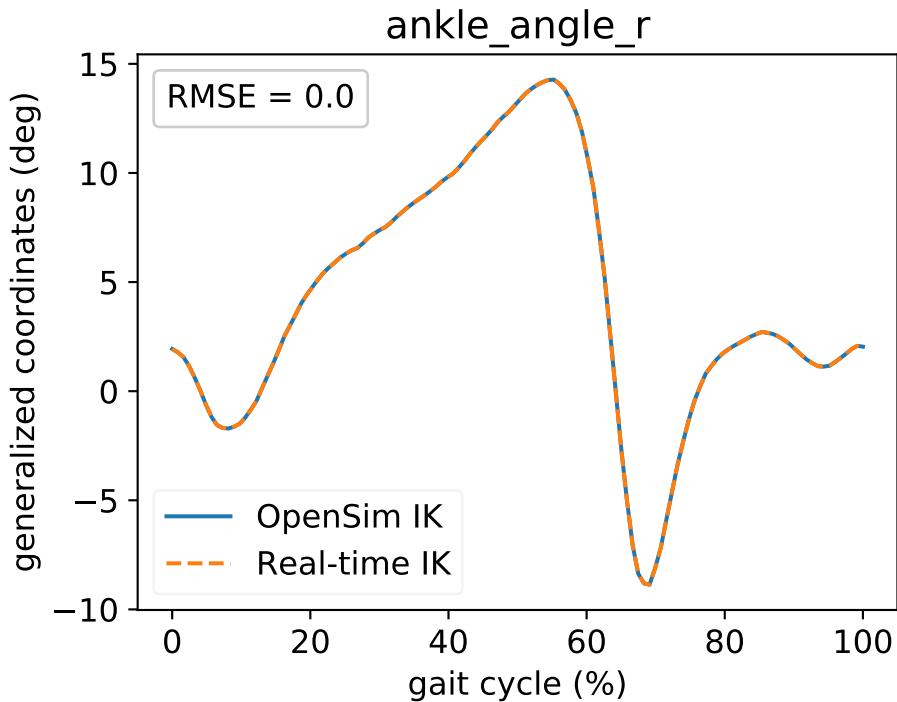

## hip\_flexion\_l

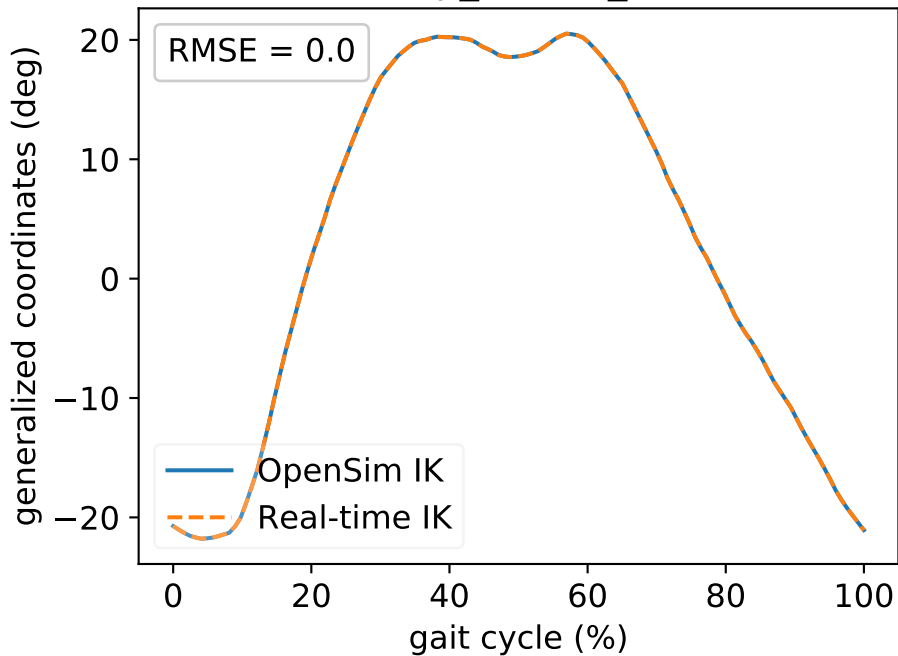

## hip\_adduction\_l

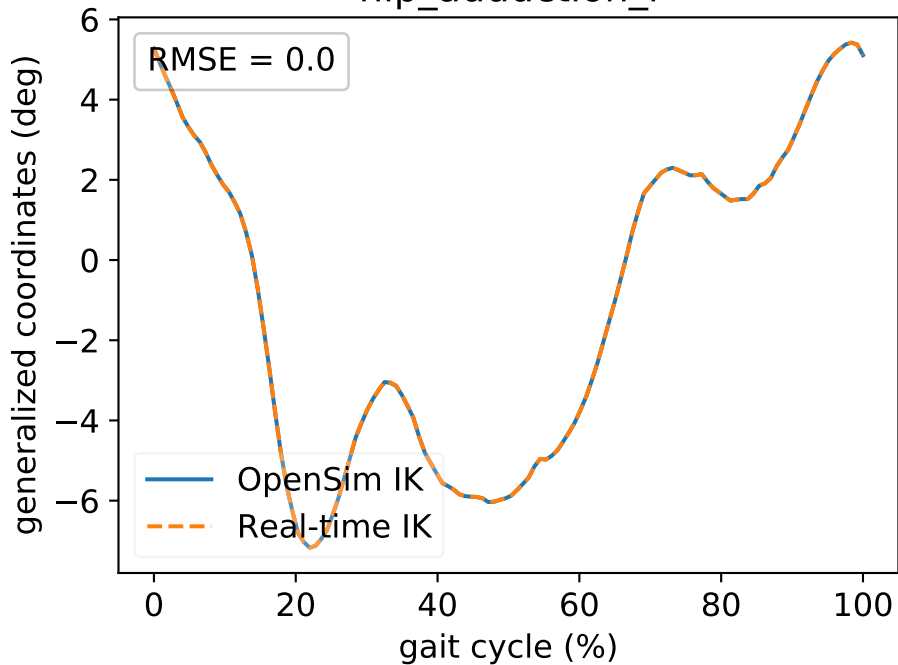

# hip\_rotation\_l

generalized coordinates (deg)

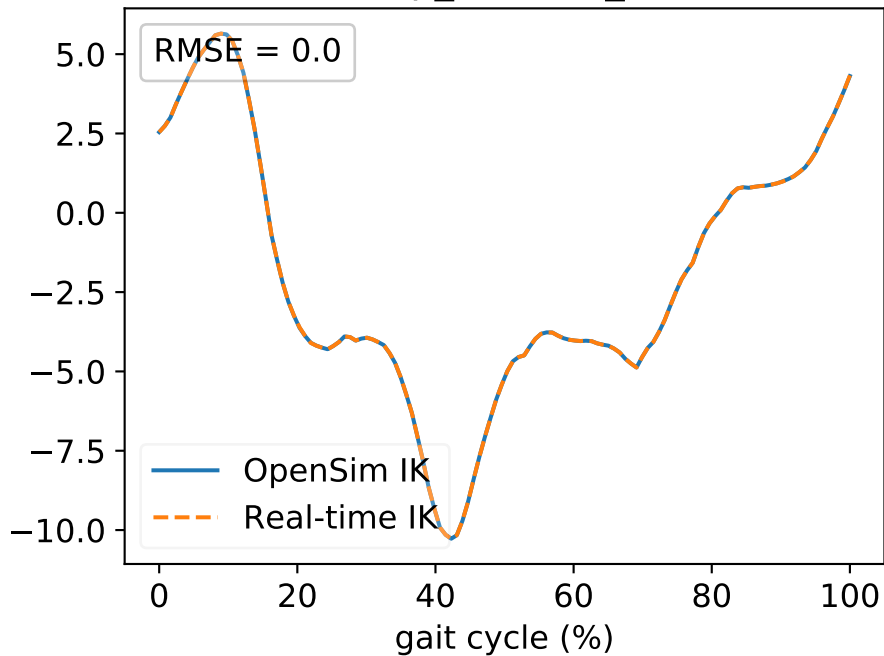

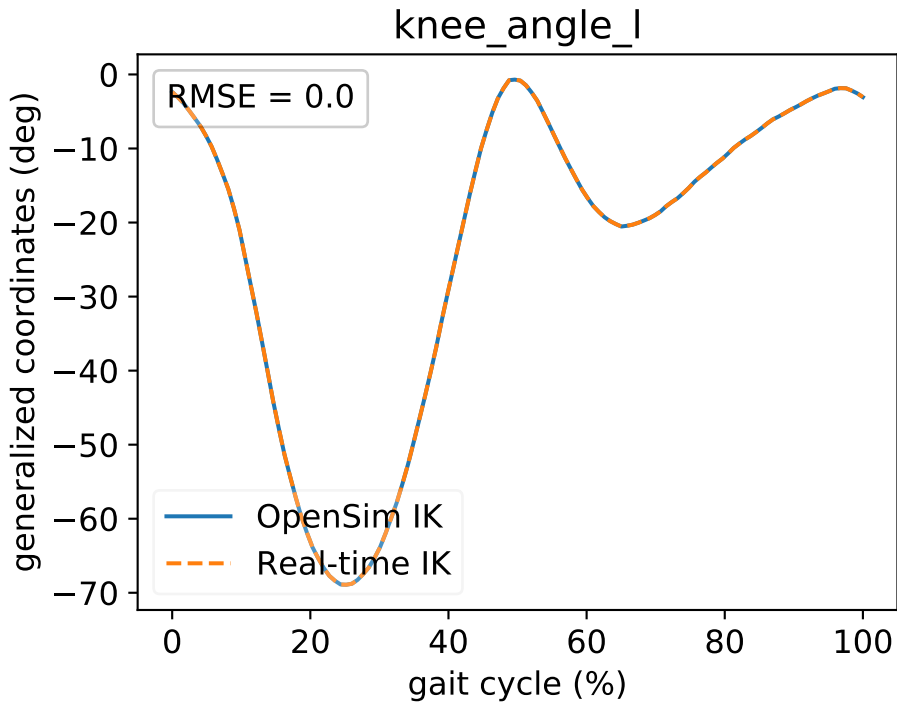

# ankle\_angle\_l

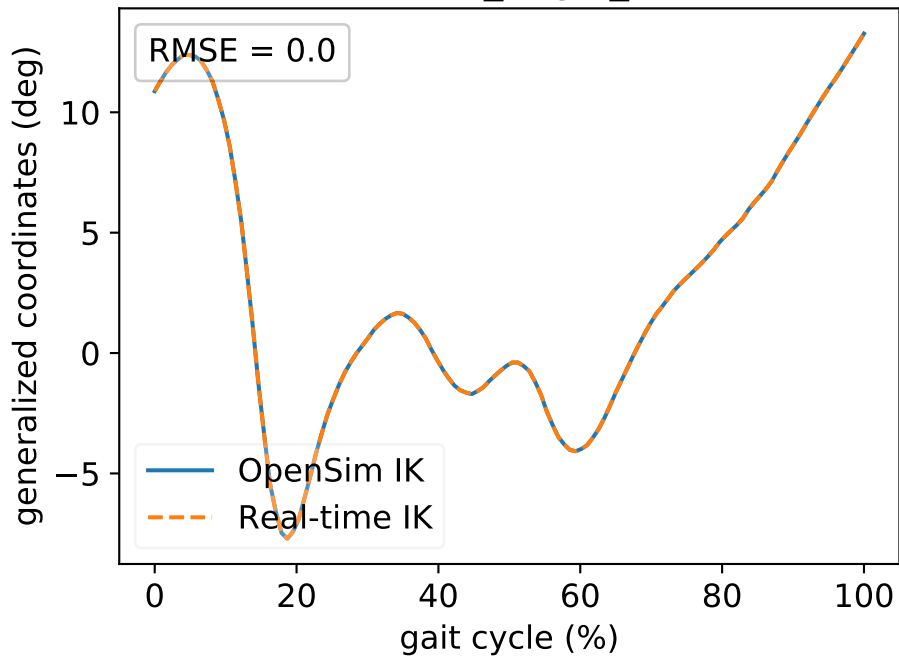



# lumbar\_extension

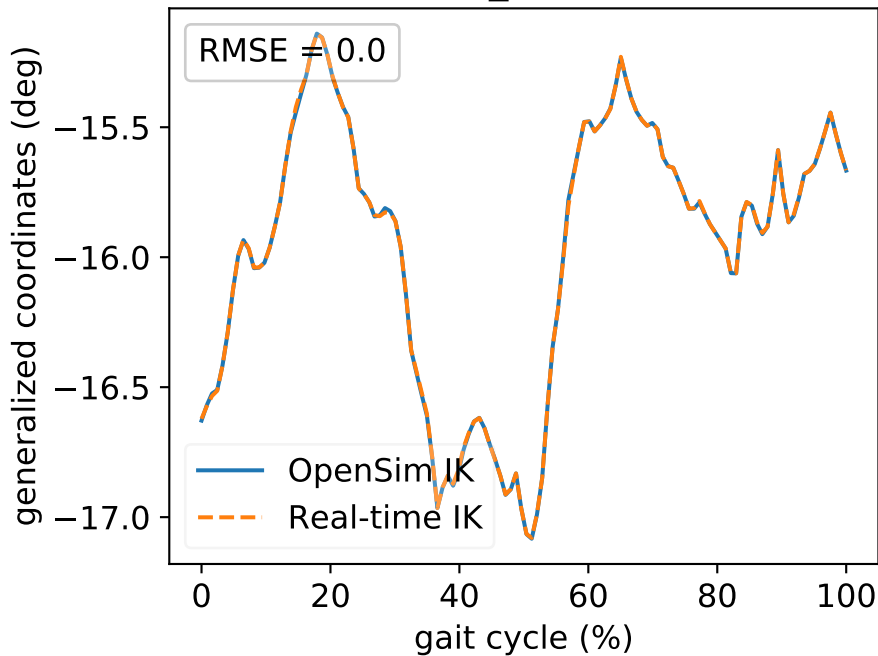

## lumbar\_bending

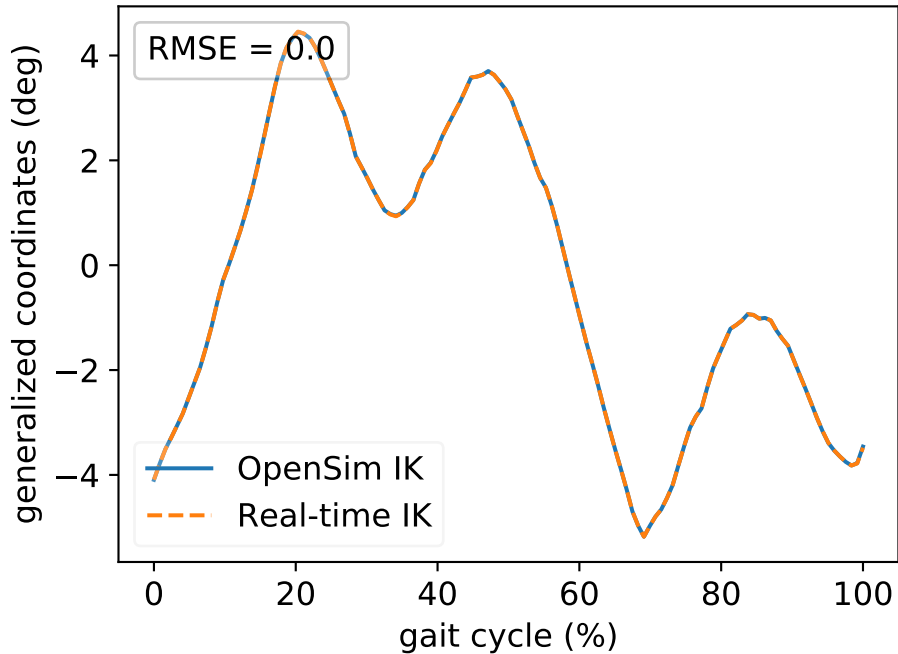

## lumbar\_rotation

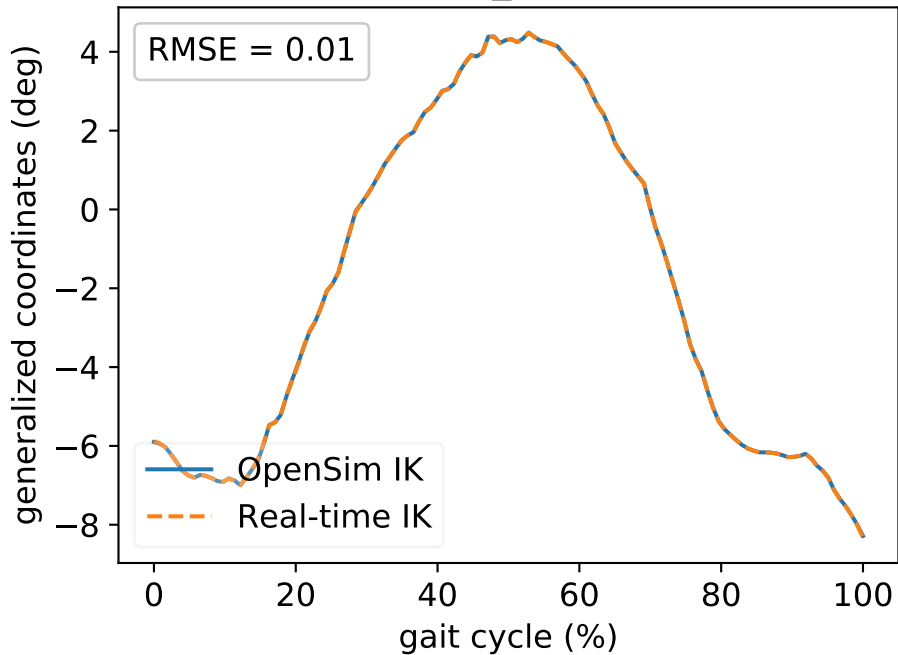

Supplement: Supplementary file 1 [file supplementary]
