# Supplementary material for: Real-Time Musculoskeletal Kinematics and Dynamics Analysis Using Marker- and IMU-based Solutions in Rehabilitation
Source: Preprints.org preprint supplement (doi:10.20944/preprints202102.0202.v2), 2021-02-26

# pelvis\_tilt

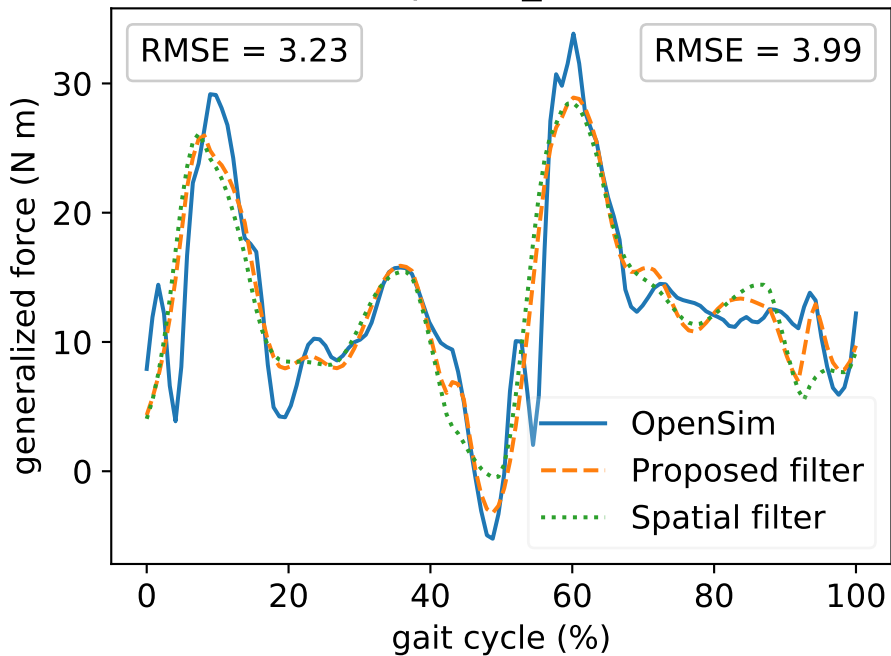

## pelvis\_list

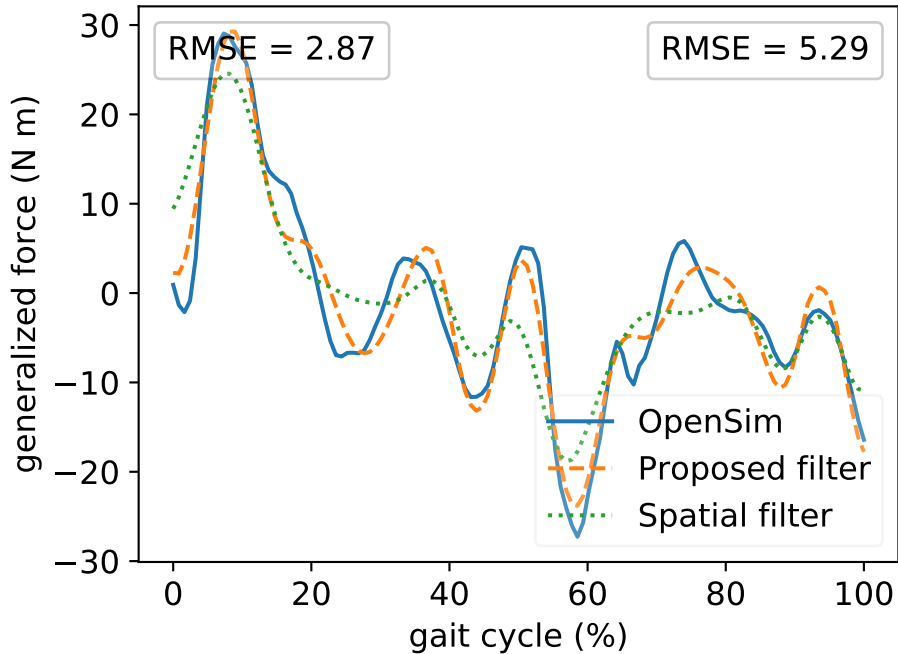

# pelvis\_rotation

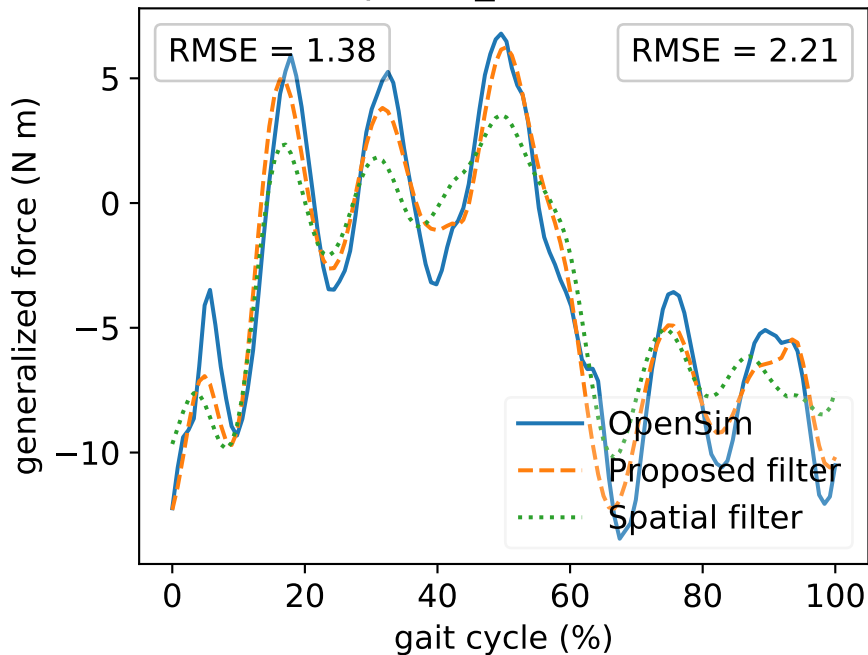

# pelvis\_tx

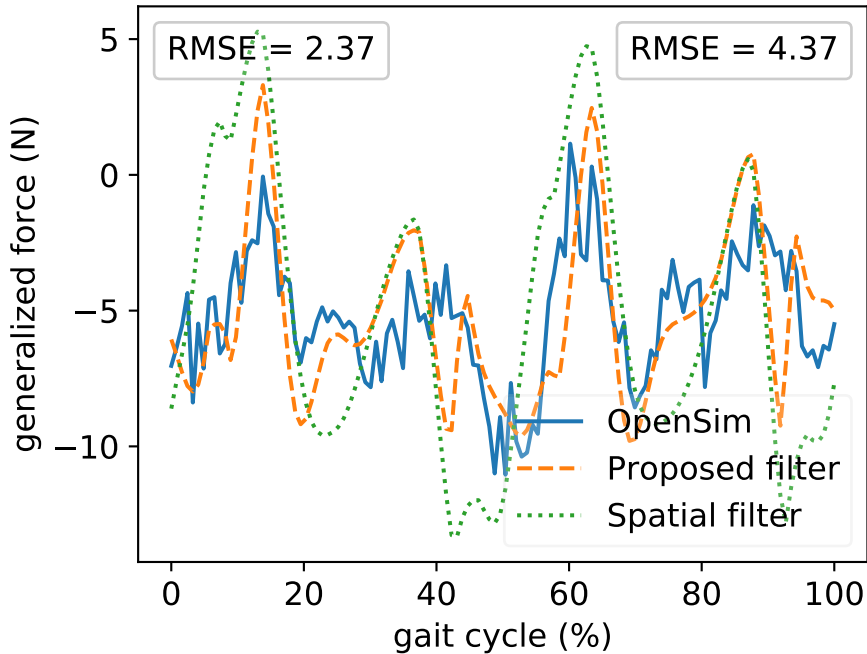

## pelvis\_ty

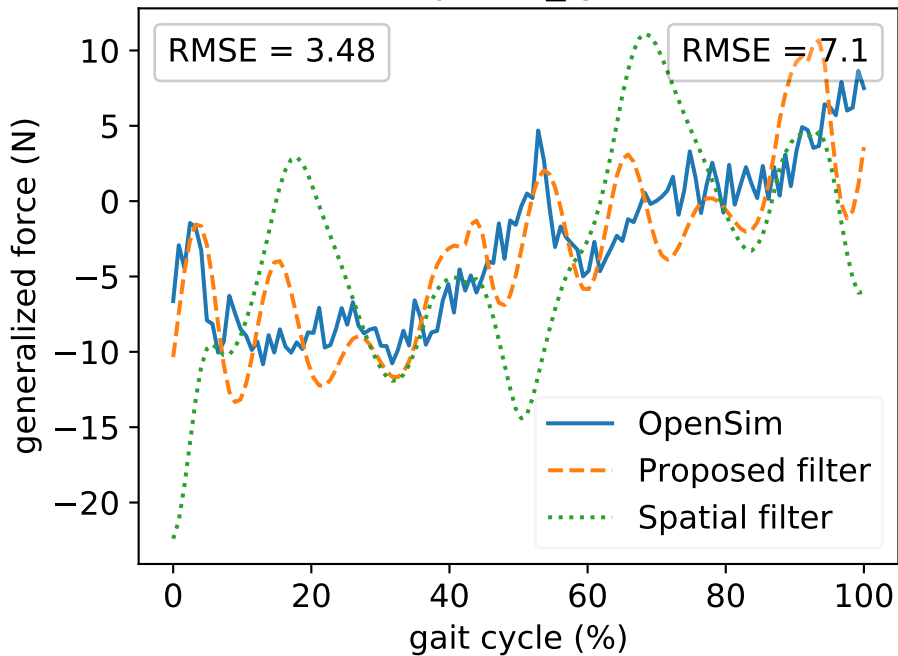

# pelvis\_tz

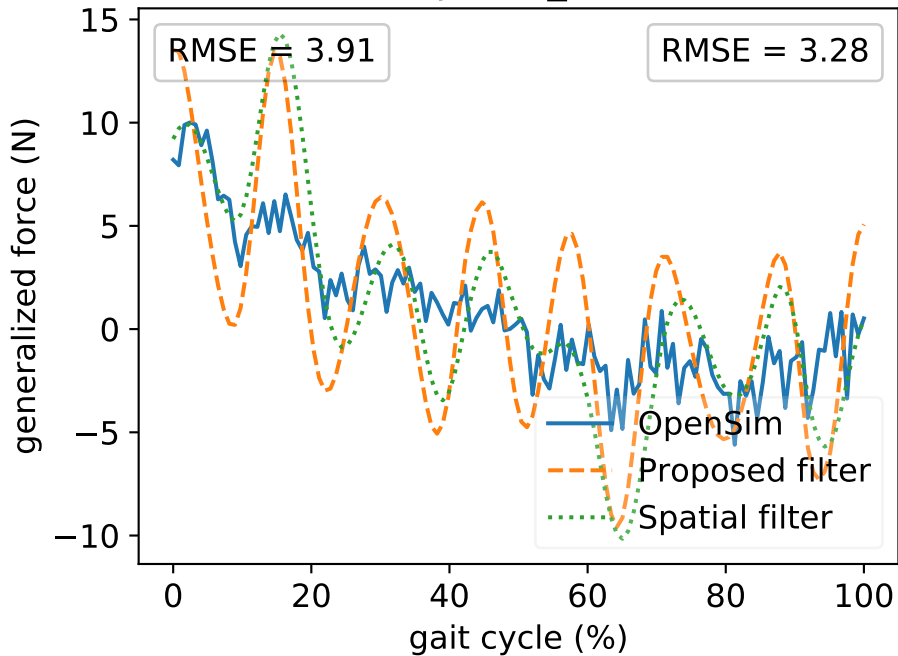

## hip\_flexion\_r

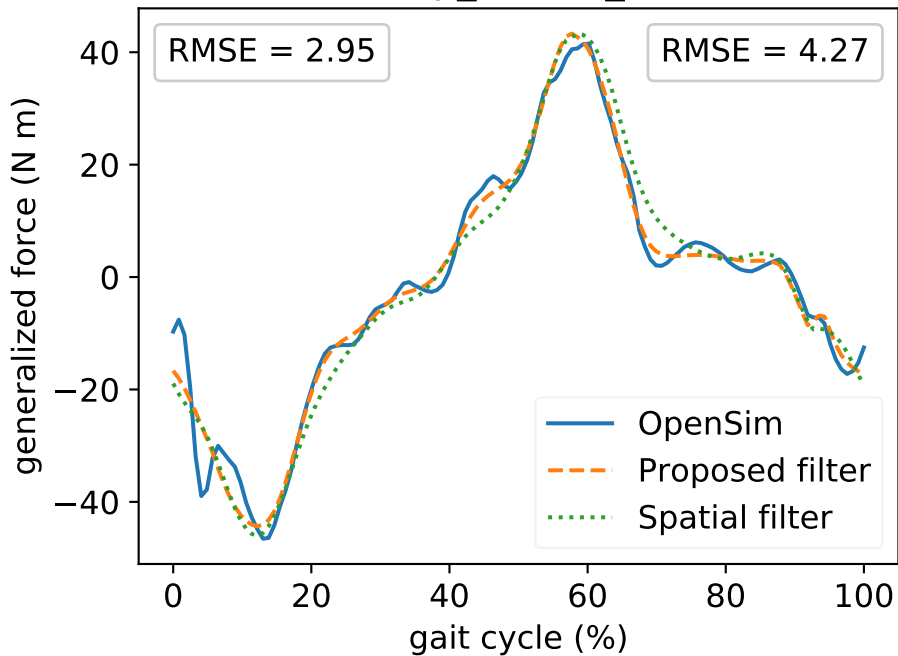

## hip\_adduction\_r

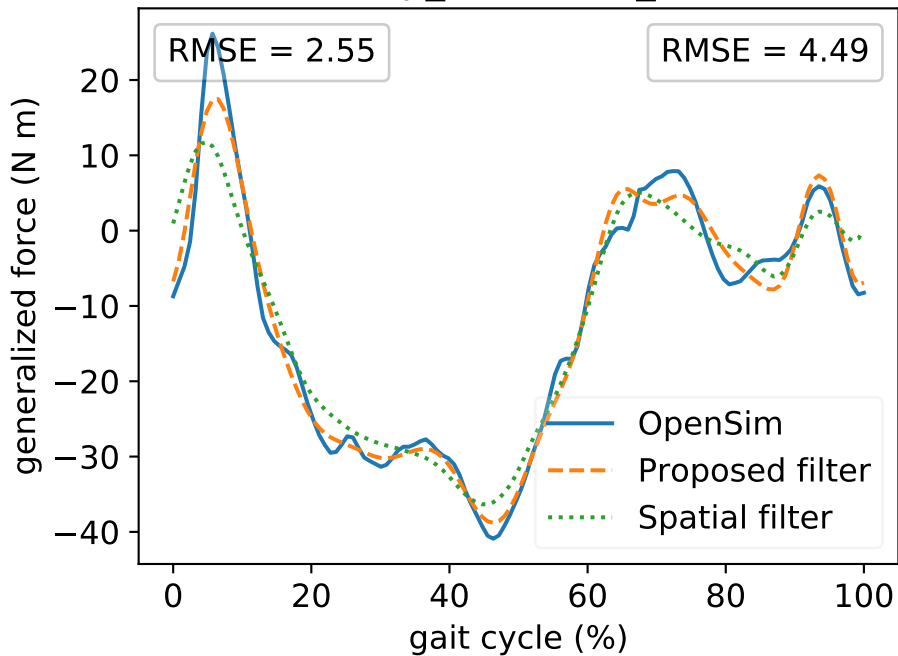



## hip\_rotation\_r

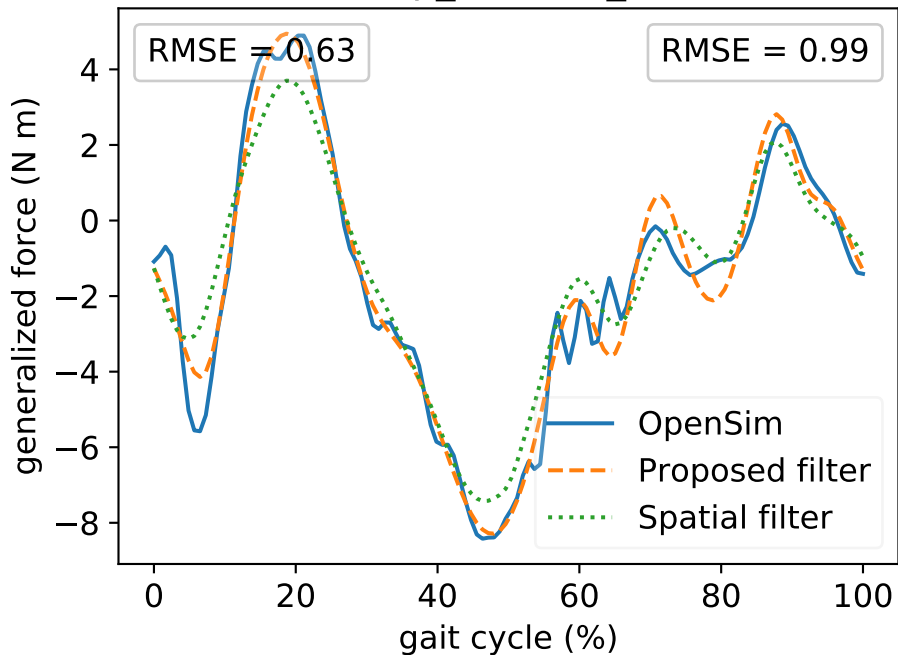

## hip\_flexion\_l

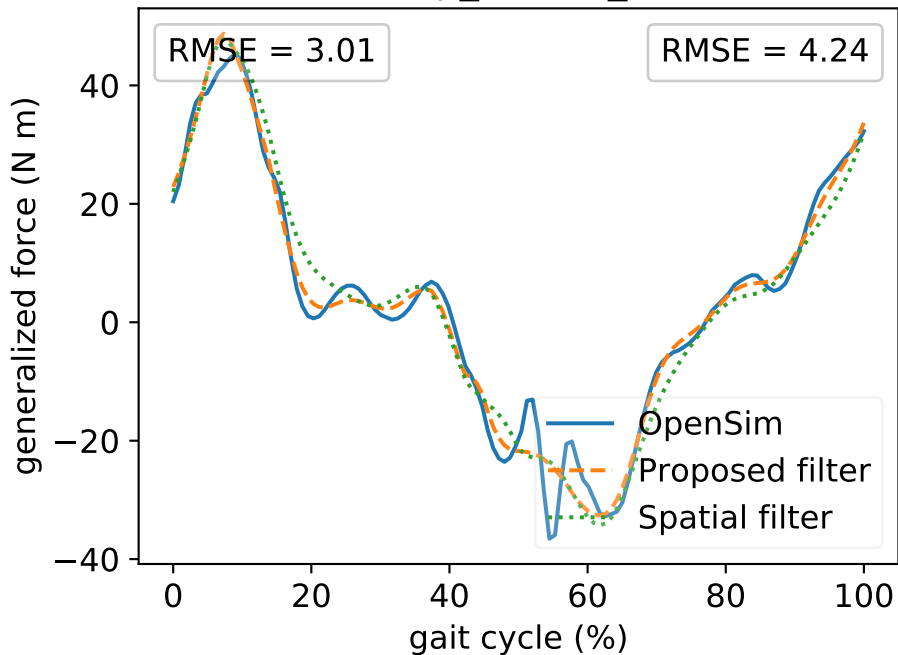

## hip\_adduction\_I

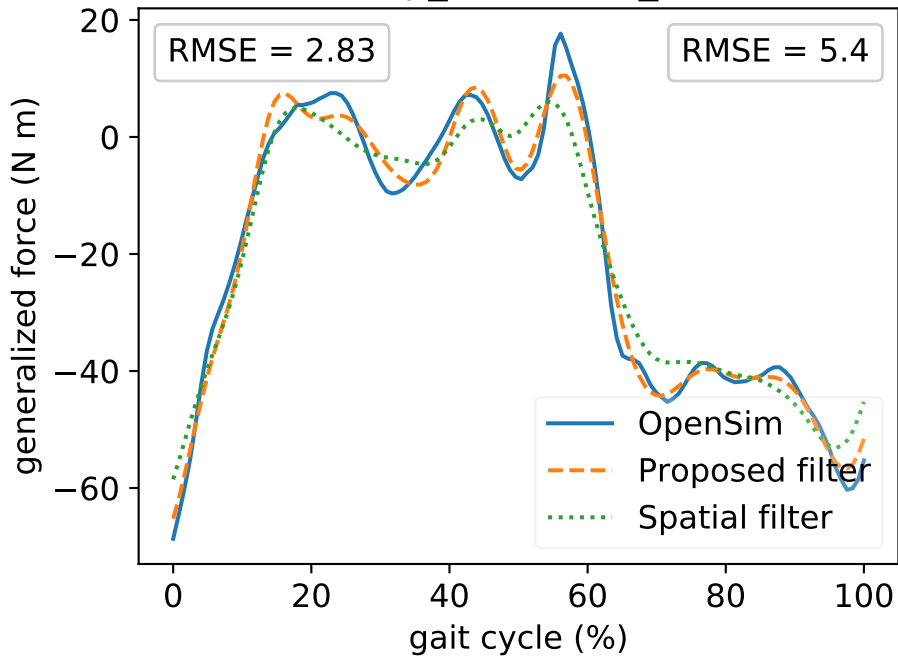

# hip\_rotation\_l

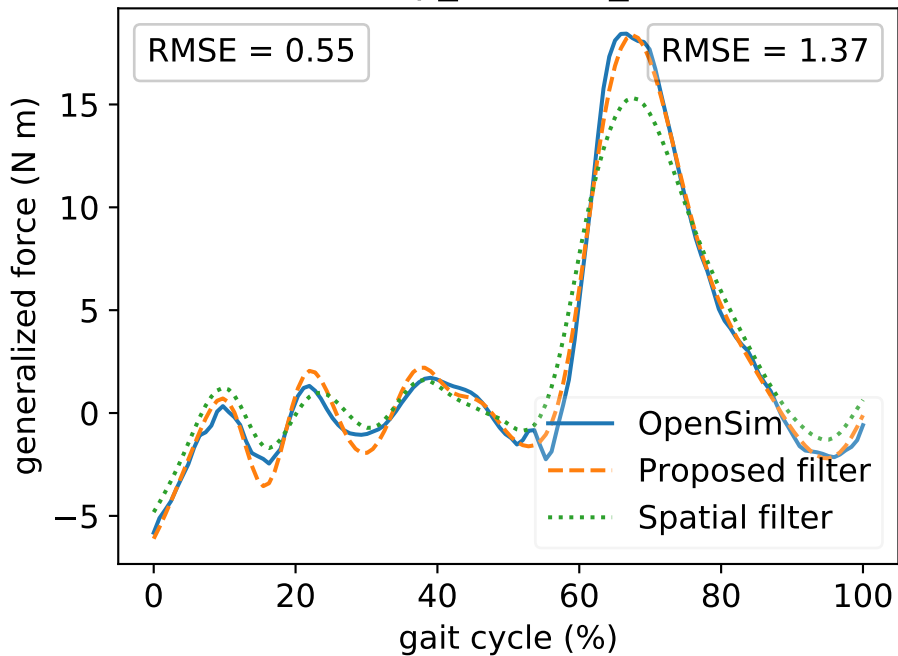

# lumbar\_extension

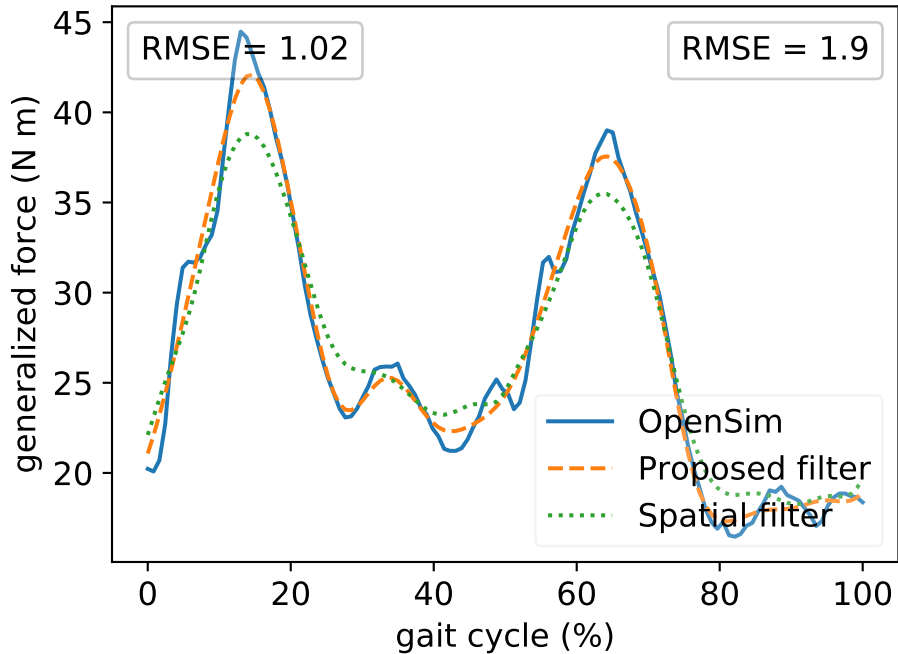

## lumbar\_bending

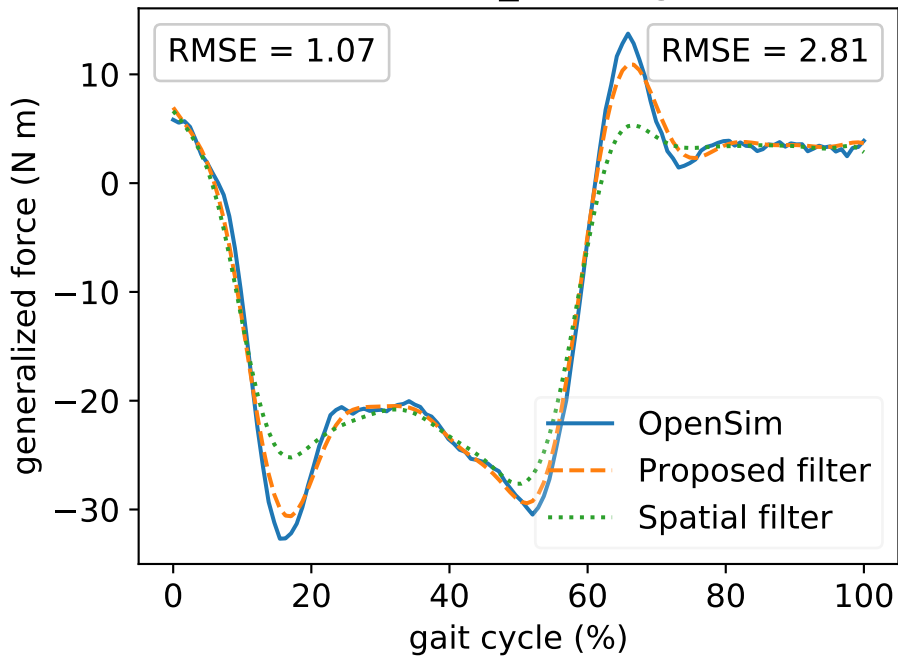

## lumbar\_rotation

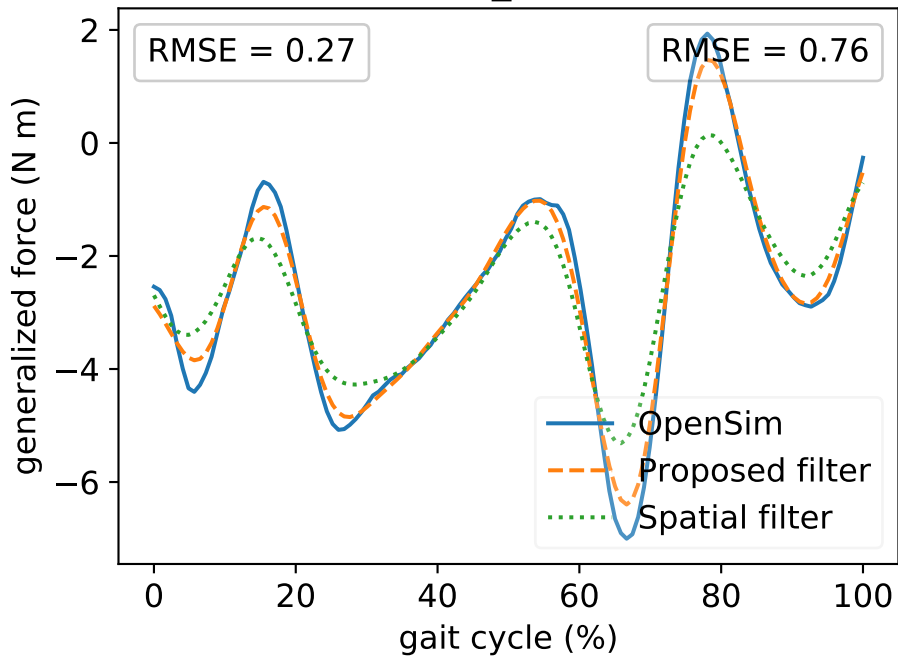

## knee\_angle\_r

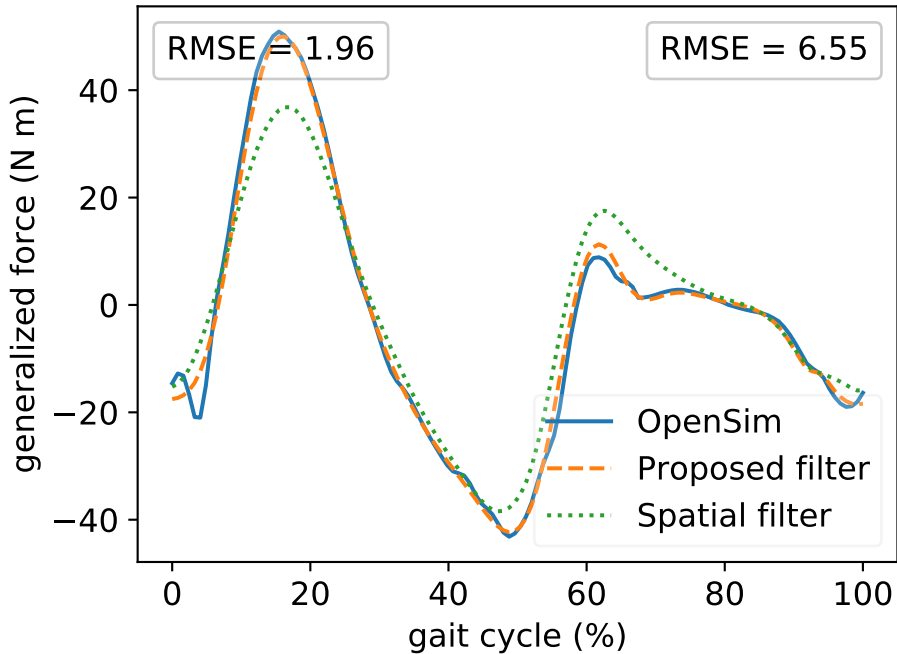



# knee\_angle\_l

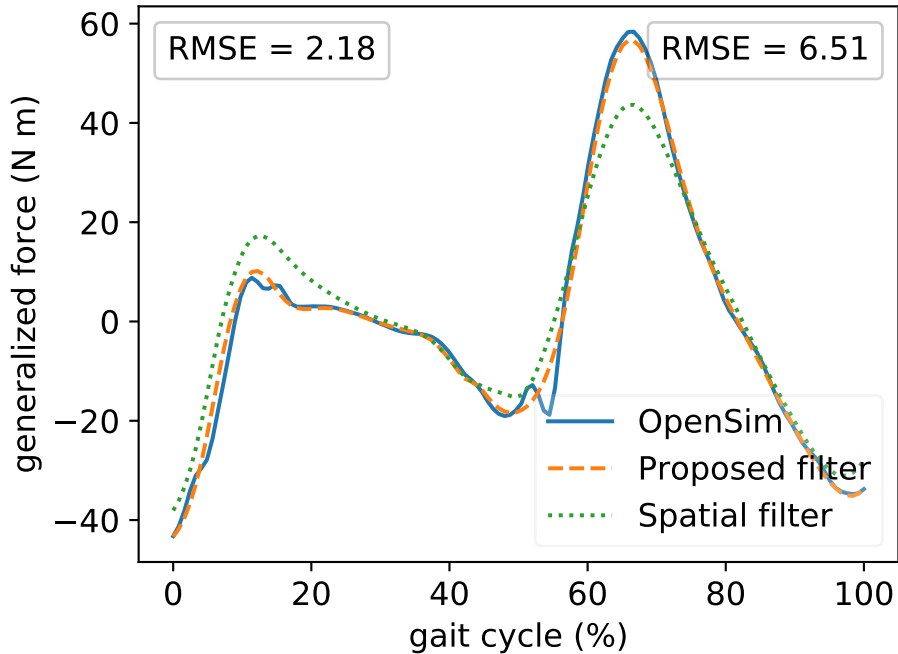

# ankle\_angle\_r

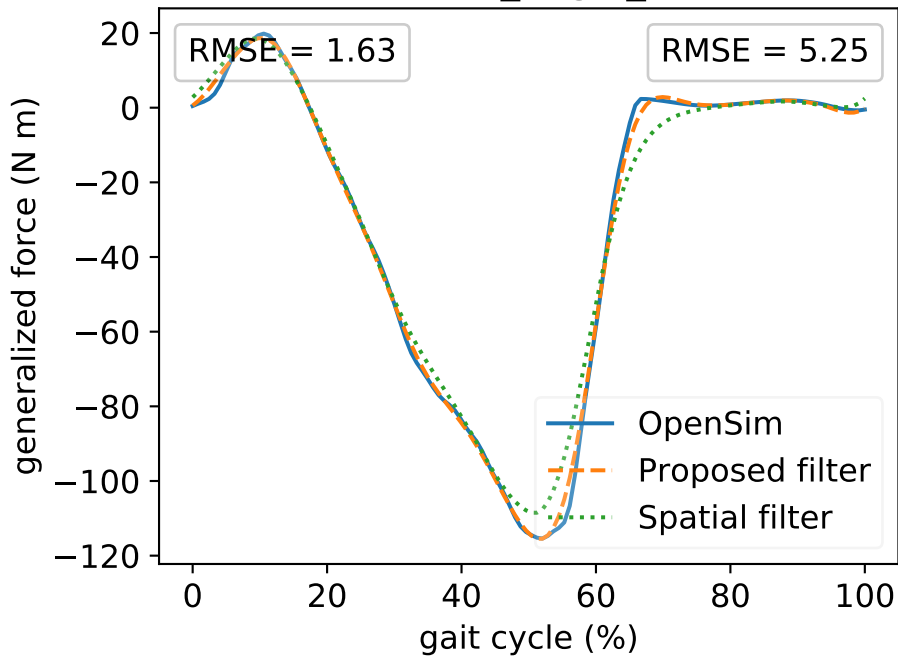

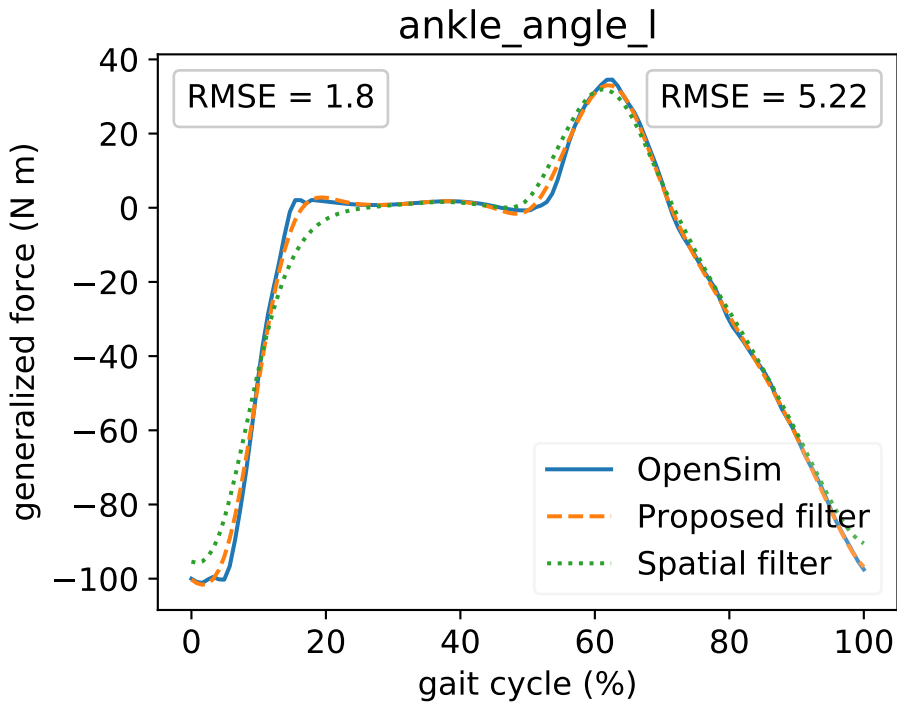

Supplement: Supplementary file 3 [file supplementary]
