# Supplementary material for: Real-Time Musculoskeletal Kinematics and Dynamics Analysis Using Marker- and IMU-based Solutions in Rehabilitation
Source: Preprints.org preprint supplement (doi:10.20944/preprints202102.0202.v2), 2021-02-26

ground\_pelvis\_on\_pelvis\_in\_ground\_fx

RMSE = 0.0

joint reaction force (N)

0.04  
0.02  
0.00  
-0.02  
-0.04

OpenSim  
Real-time

0 20 40 60 80 100  
gait cycle (%)

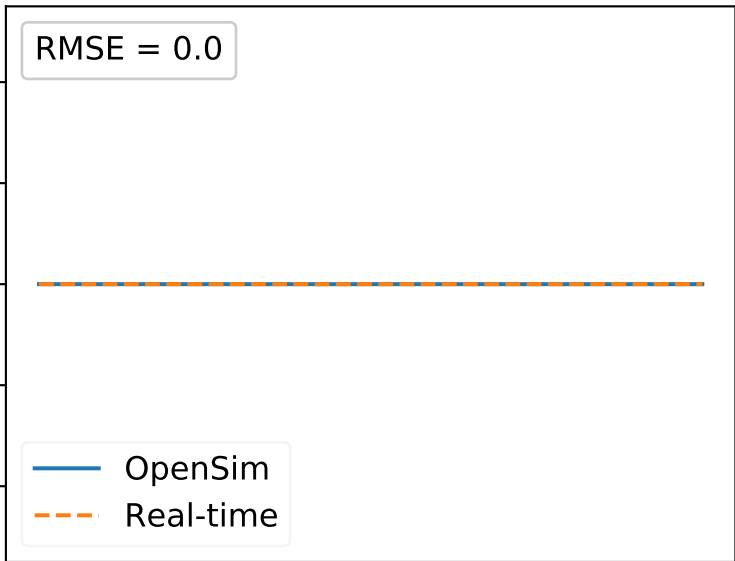

ground\_pelvis\_on\_pelvis\_in\_ground\_fy

RMSE = 0.0

joint reaction force (N)

0.04  
0.02  
0.00  
-0.02  
-0.04

OpenSim  
Real-time

0 20 40 60 80 100

gait cycle (%)

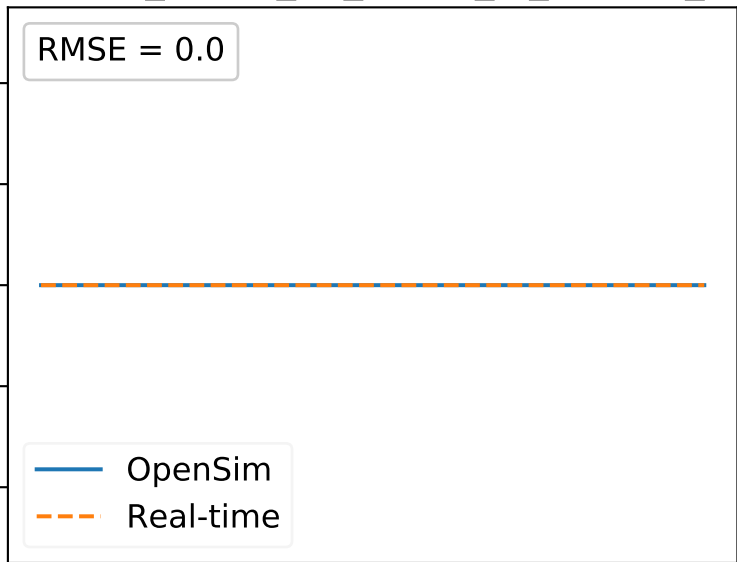

ground\_pelvis\_on\_pelvis\_in\_ground\_fz

RMSE = 0.0

joint reaction force (N)

0.04  
0.02  
0.00  
-0.02  
-0.04

OpenSim  
Real-time

0 20 40 60 80 100

gait cycle (%)

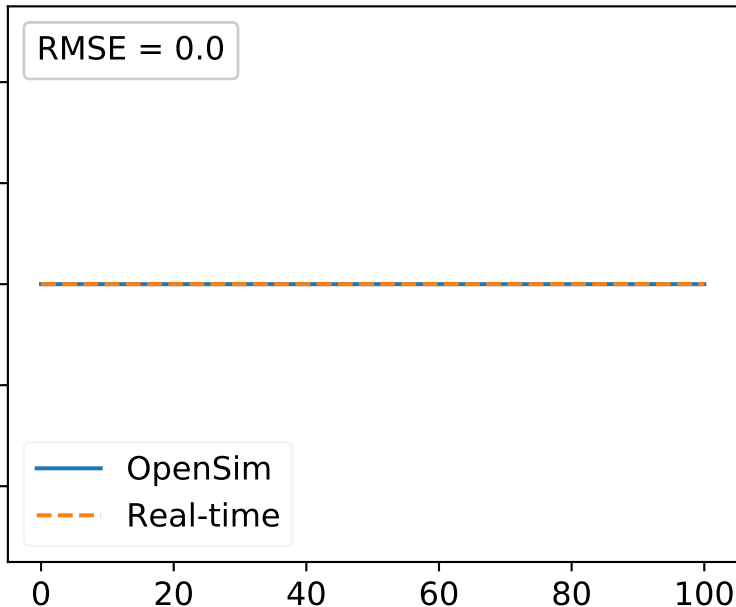

ground\_pelvis\_on\_pelvis\_in\_ground\_mx

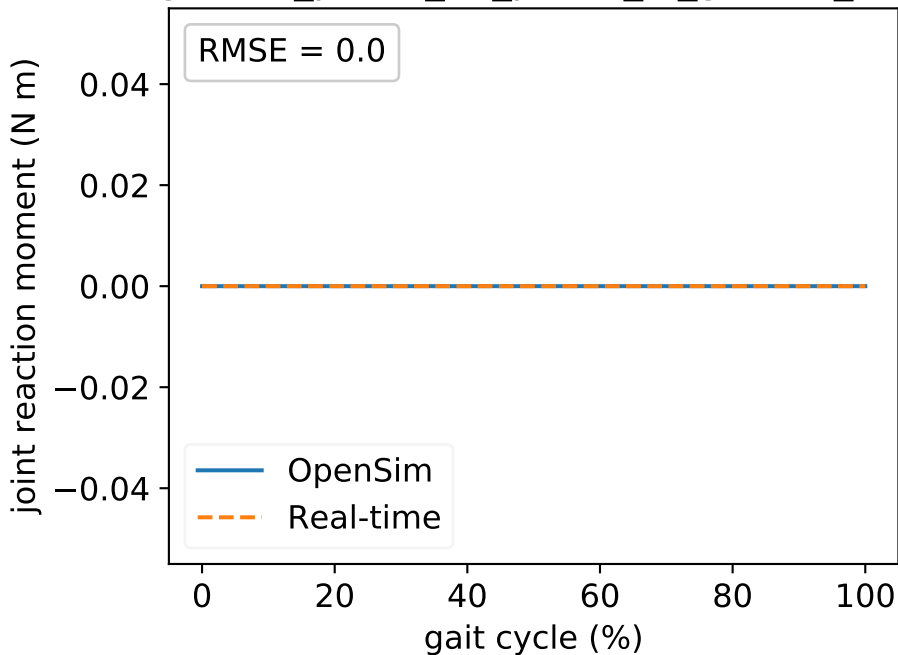

ground\_pelvis\_on\_pelvis\_in\_ground\_my

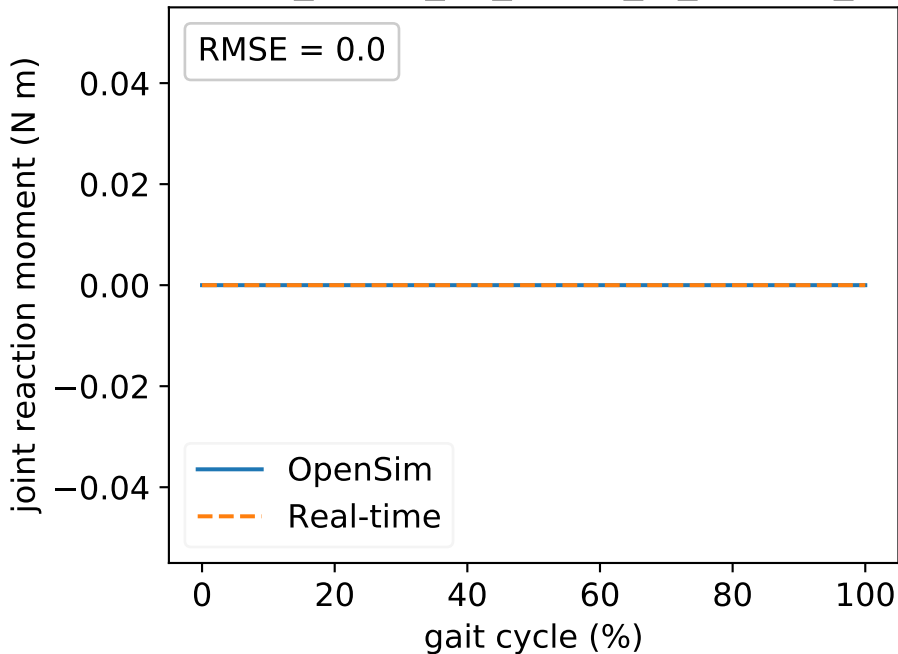

ground\_pelvis\_on\_pelvis\_in\_ground\_mz

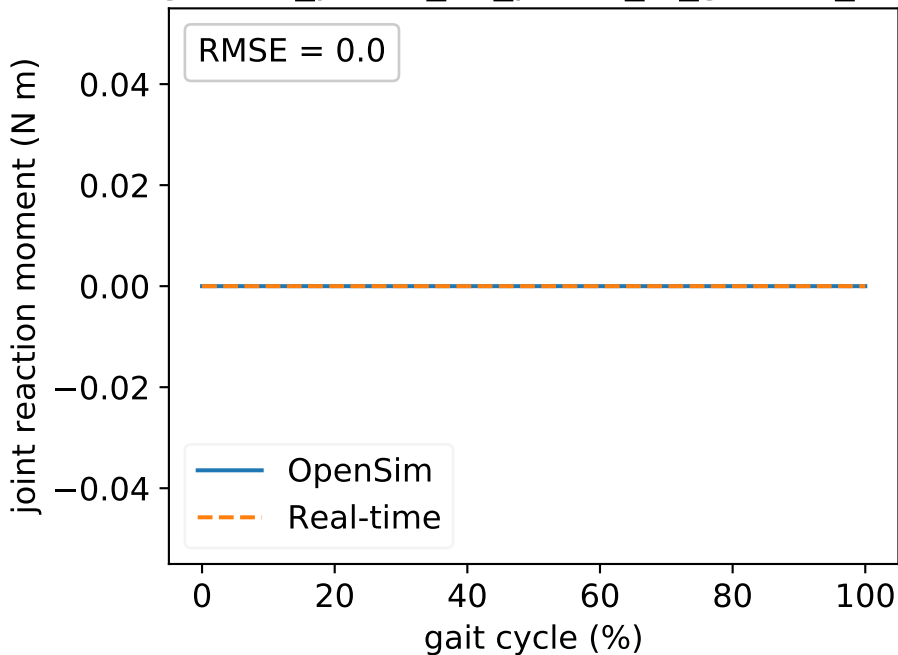

# ground\_pelvis\_on\_pelvis\_in\_ground\_px

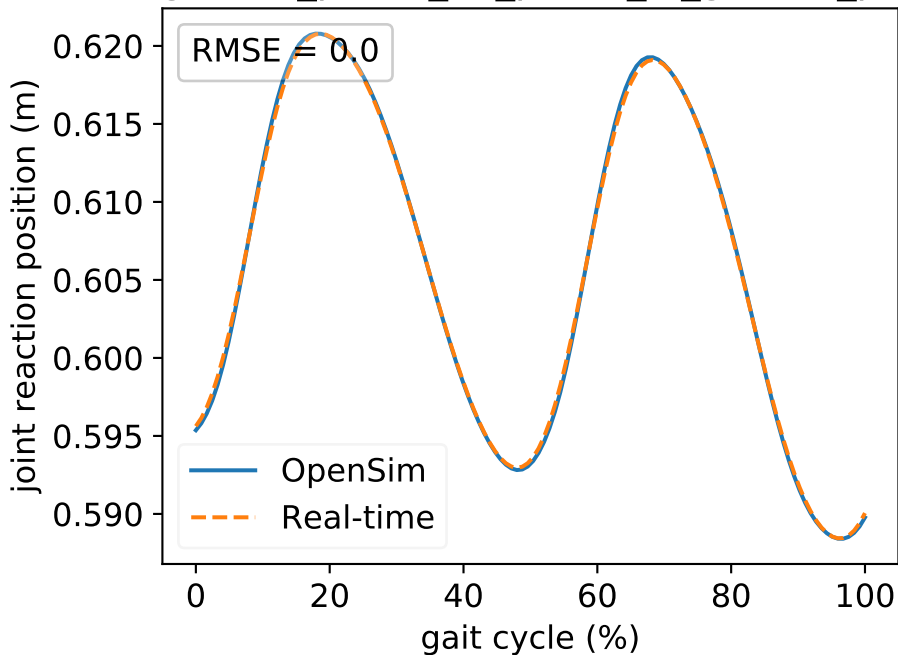

ground\_pelvis\_on\_pelvis\_in\_ground\_py

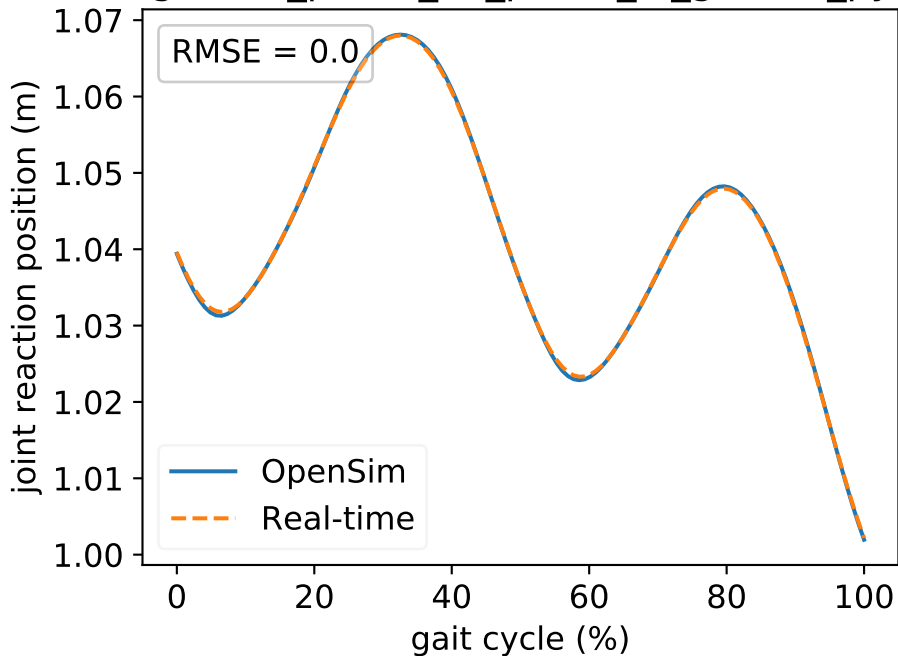



# ground\_pelvis\_on\_pelvis\_in\_ground\_pz

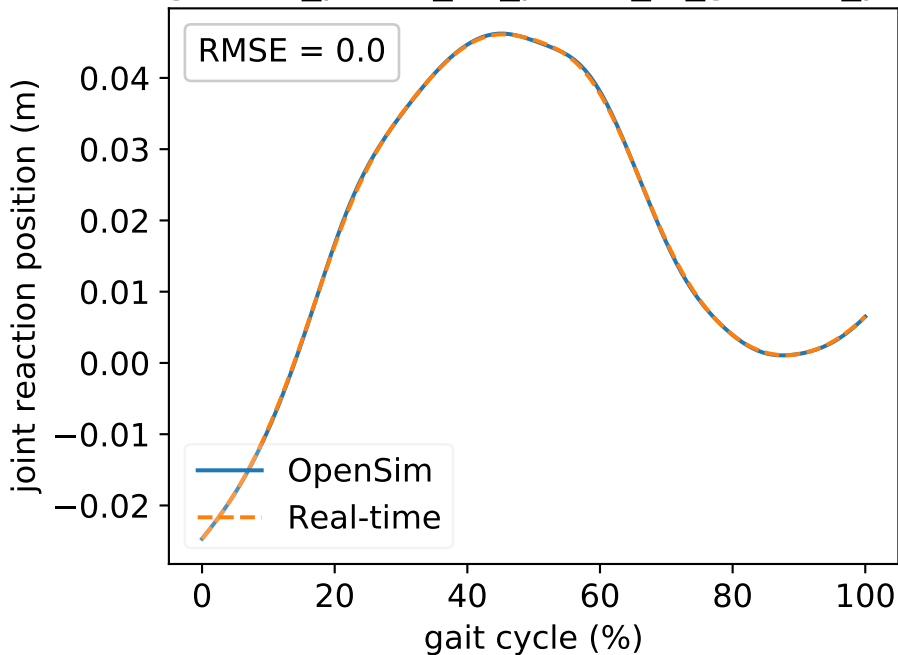

# hip\_r\_on\_femur\_r\_in\_ground\_fx

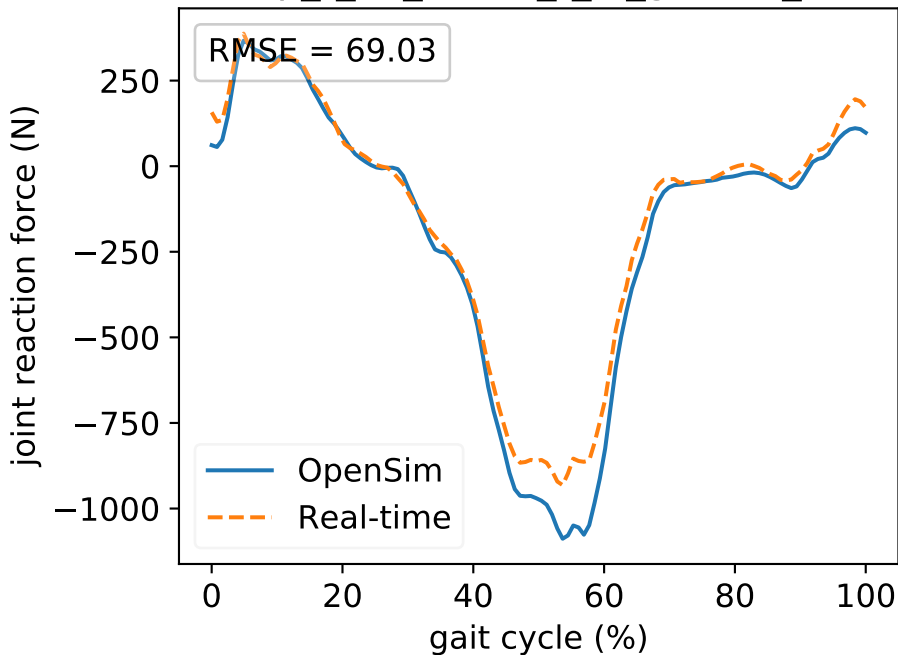

# hip\_r\_on\_femur\_r\_in\_ground\_fy

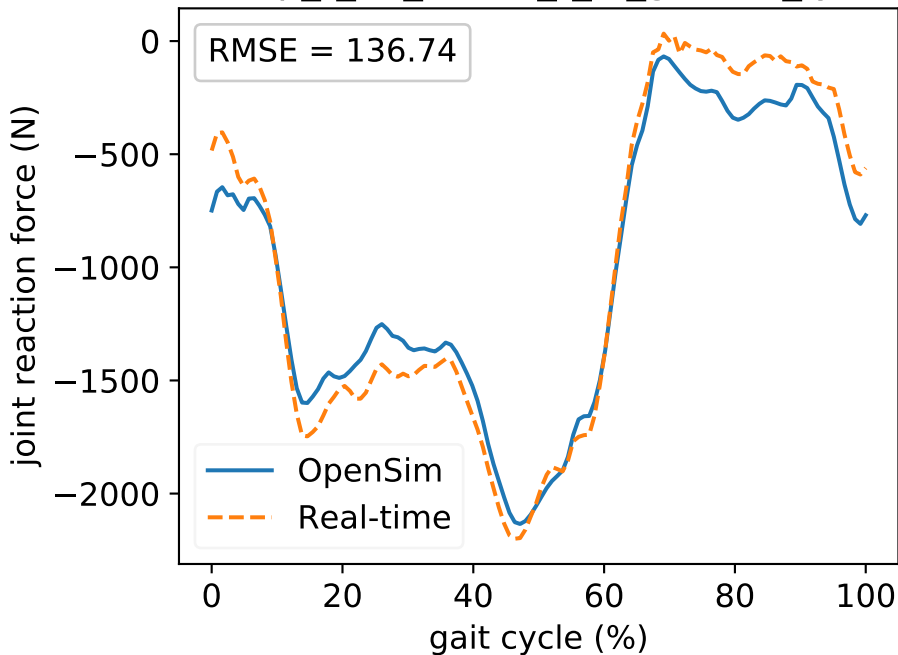

# hip\_r\_on\_femur\_r\_in\_ground\_fz

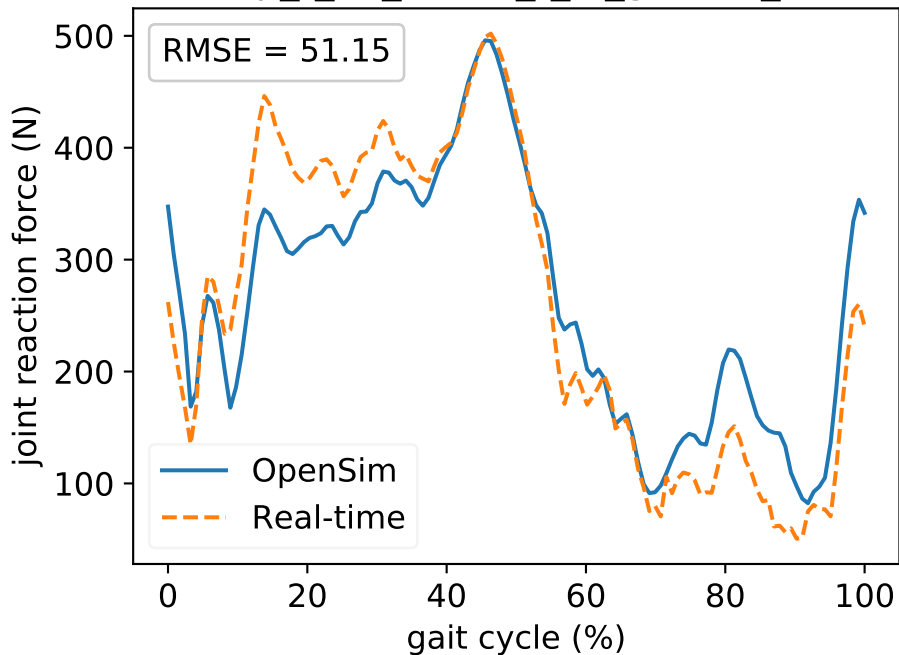

# hip\_r\_on\_femur\_r\_in\_ground\_mx

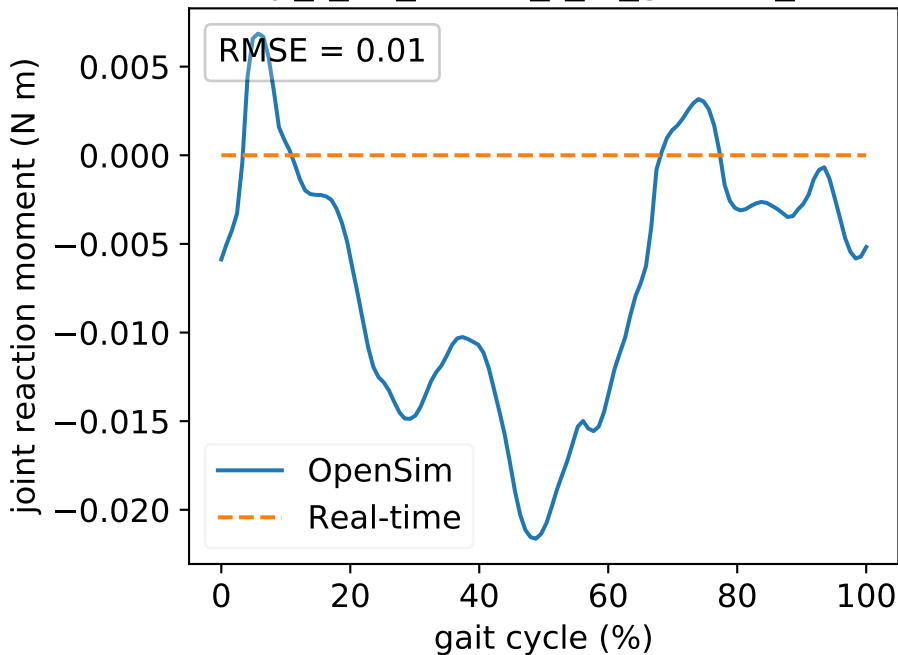

# hip\_r\_on\_femur\_r\_in\_ground\_my

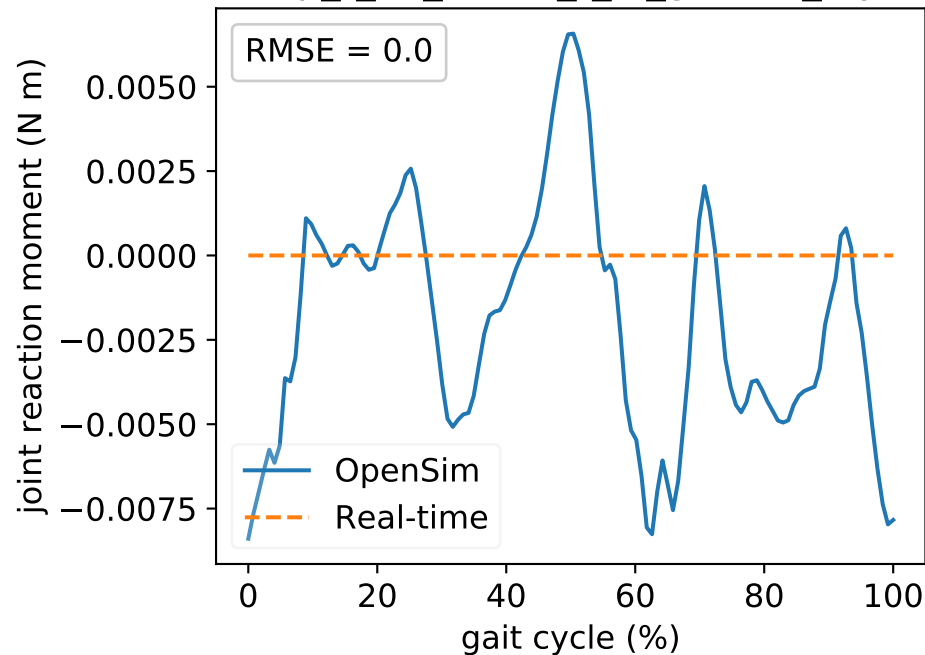

# hip\_r\_on\_femur\_r\_in\_ground\_mz

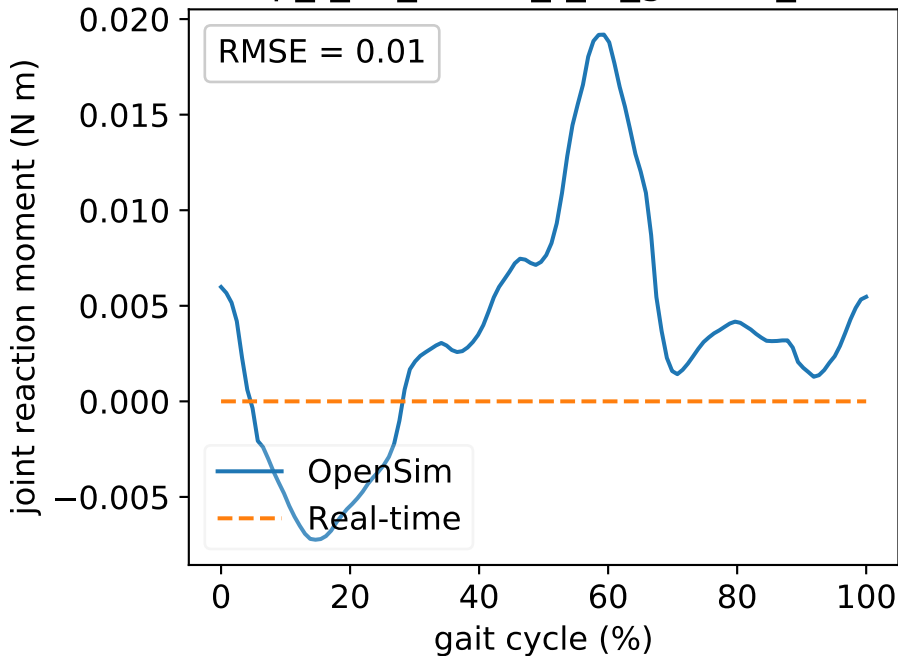

# hip\_r\_on\_femur\_r\_in\_ground\_px

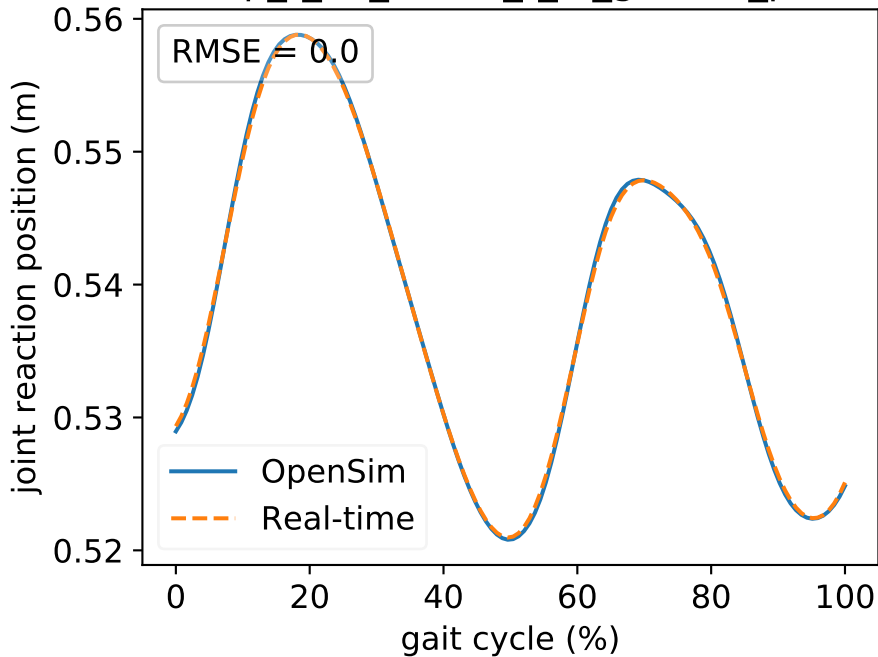



# hip\_r\_on\_femur\_r\_in\_ground\_py

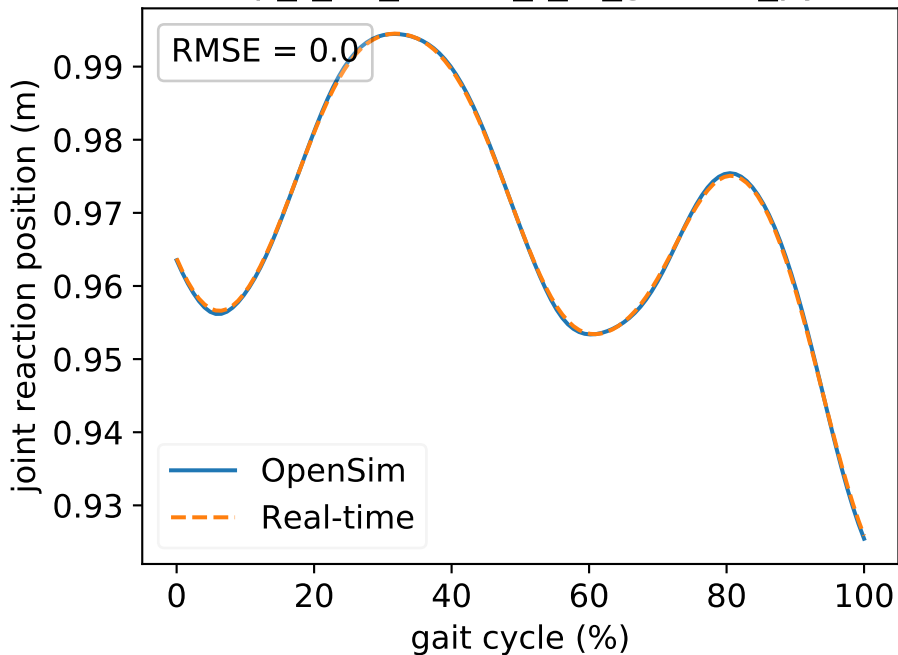

# hip\_r\_on\_femur\_r\_in\_ground\_pz

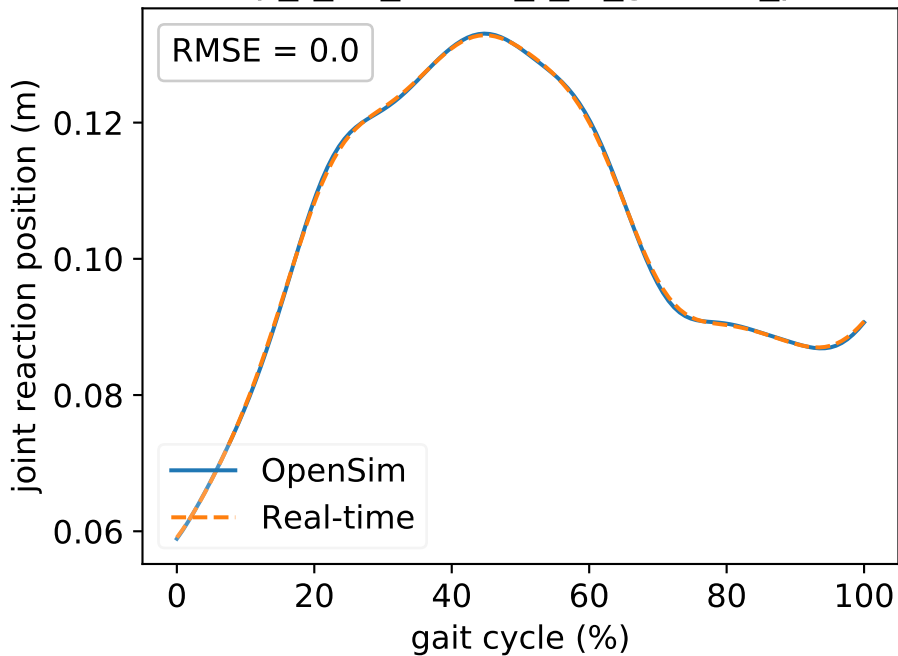

# knee\_r\_on\_tibia\_r\_in\_ground\_fx

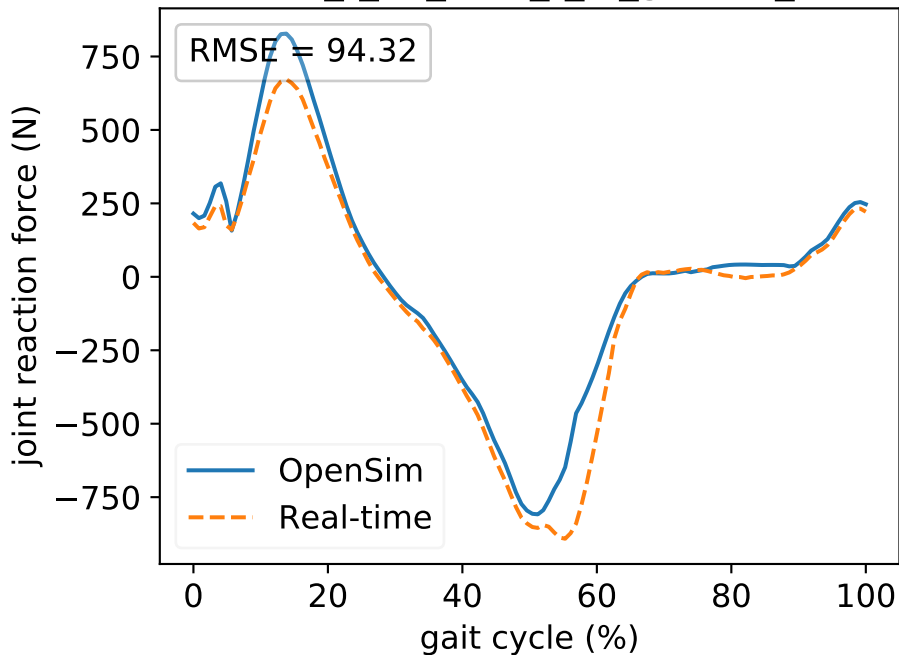

# knee\_r\_on\_tibia\_r\_in\_ground\_fy

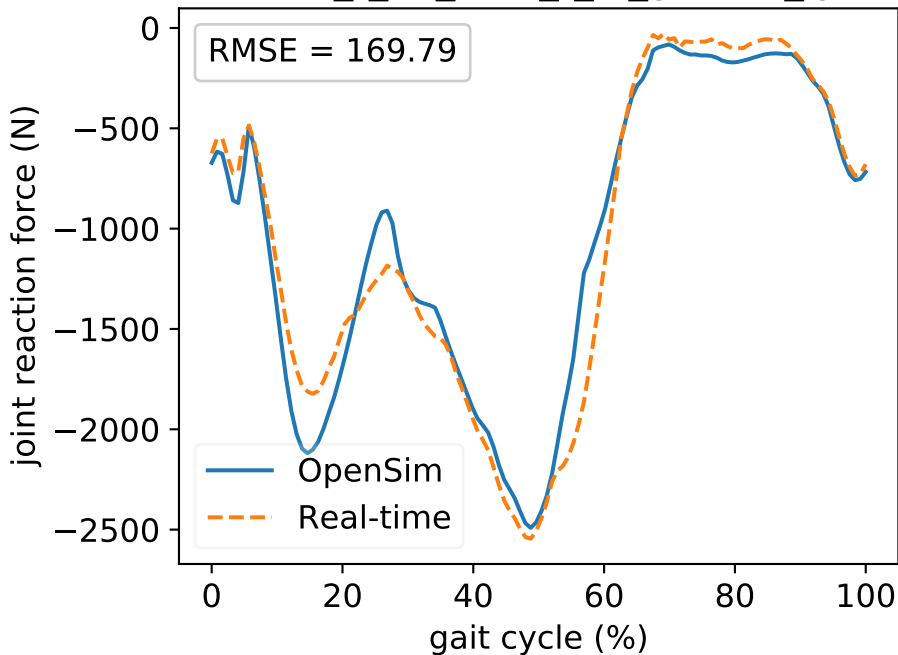

# knee\_r\_on\_tibia\_r\_in\_ground\_fz

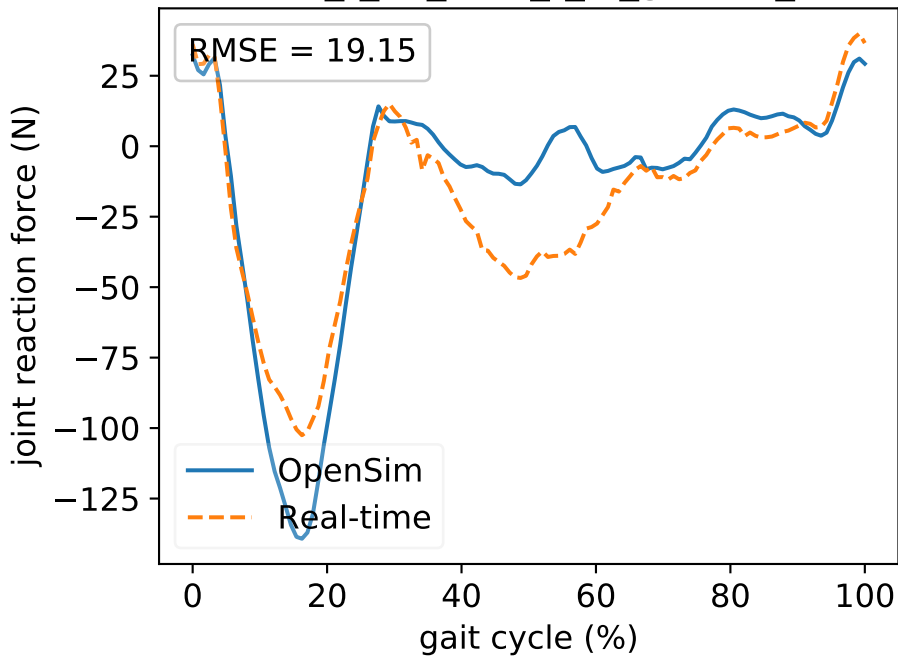

# knee\_r\_on\_tibia\_r\_in\_ground\_mx

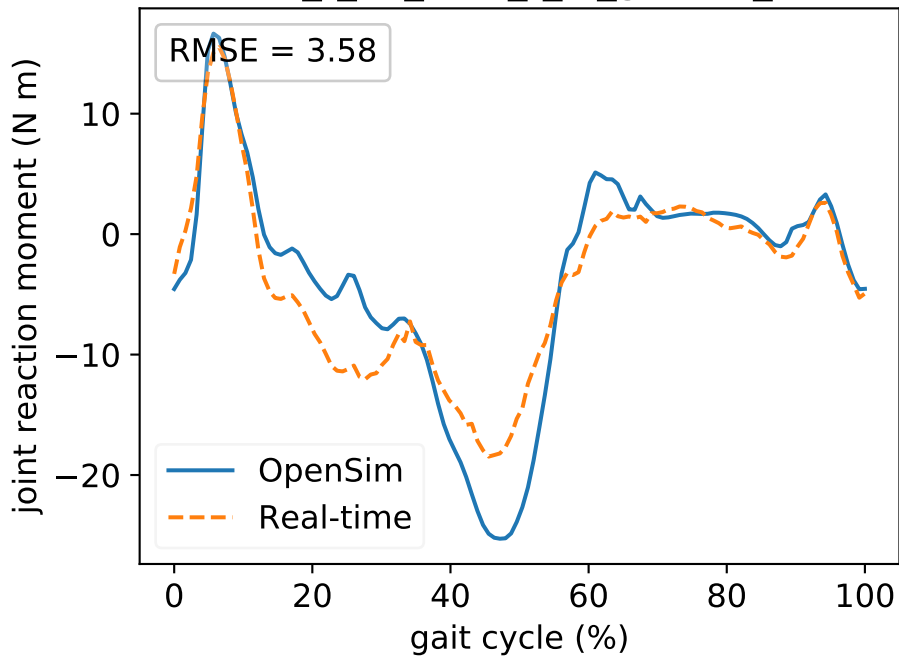

# knee\_r\_on\_tibia\_r\_in\_ground\_my

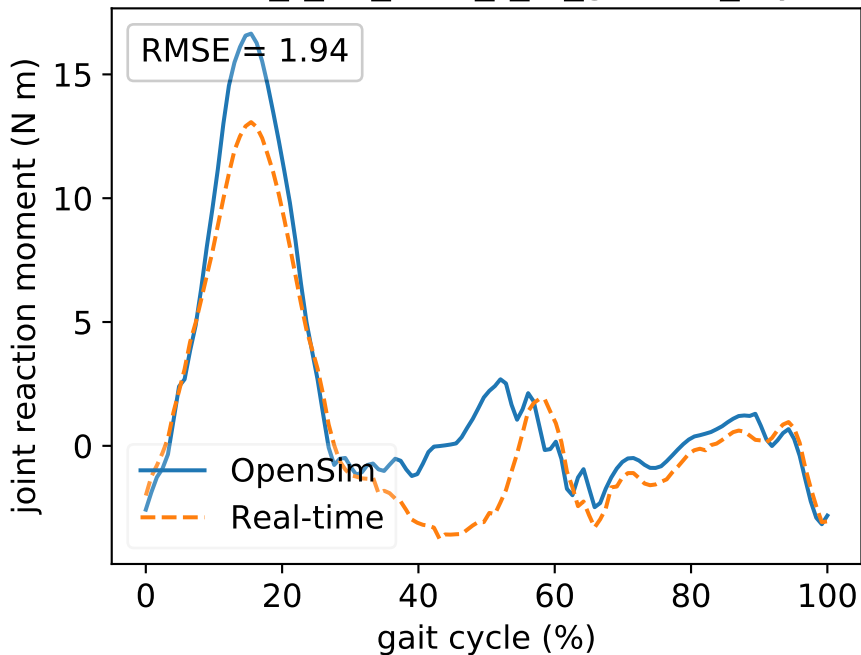

# knee\_r\_on\_tibia\_r\_in\_ground\_mz

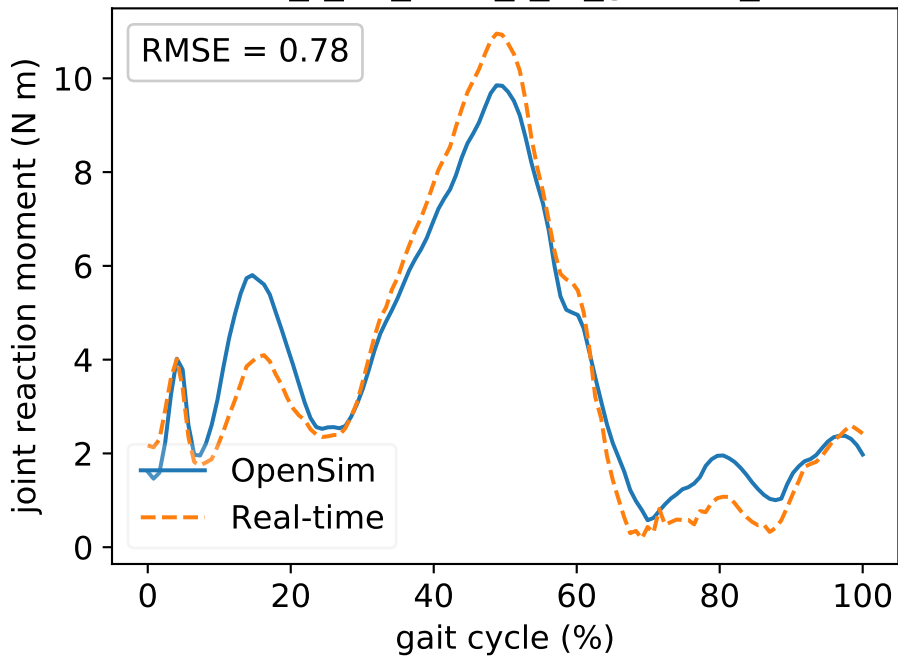



# knee\_r\_on\_tibia\_r\_in\_ground\_px

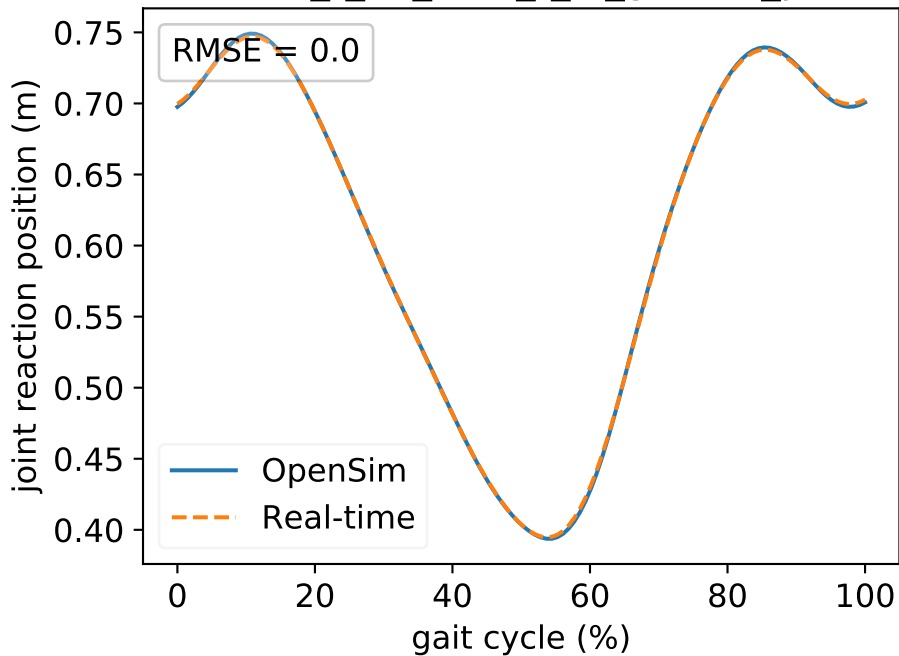

# knee\_r\_on\_tibia\_r\_in\_ground\_py

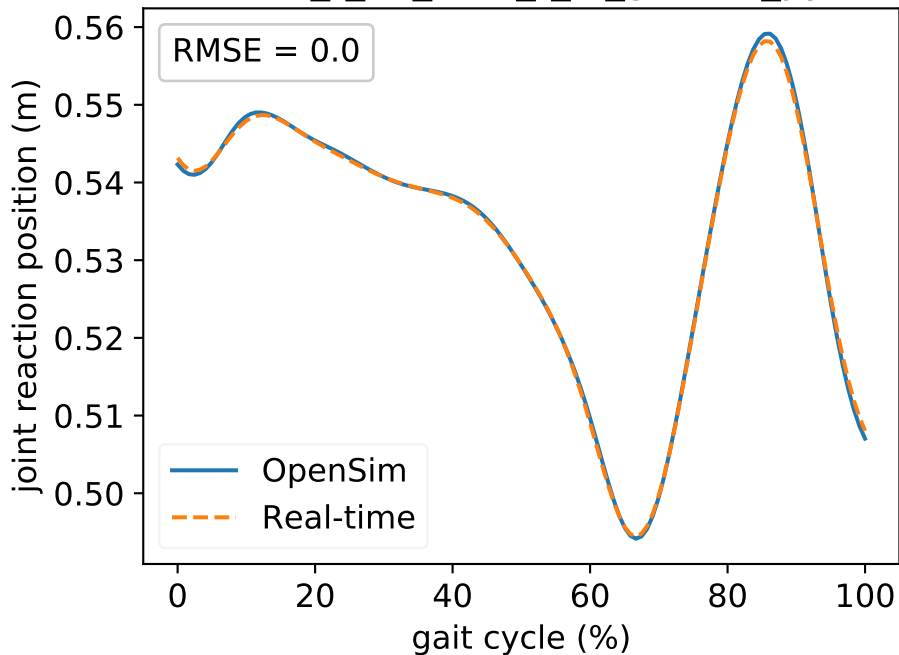

# knee\_r\_on\_tibia\_r\_in\_ground\_pz

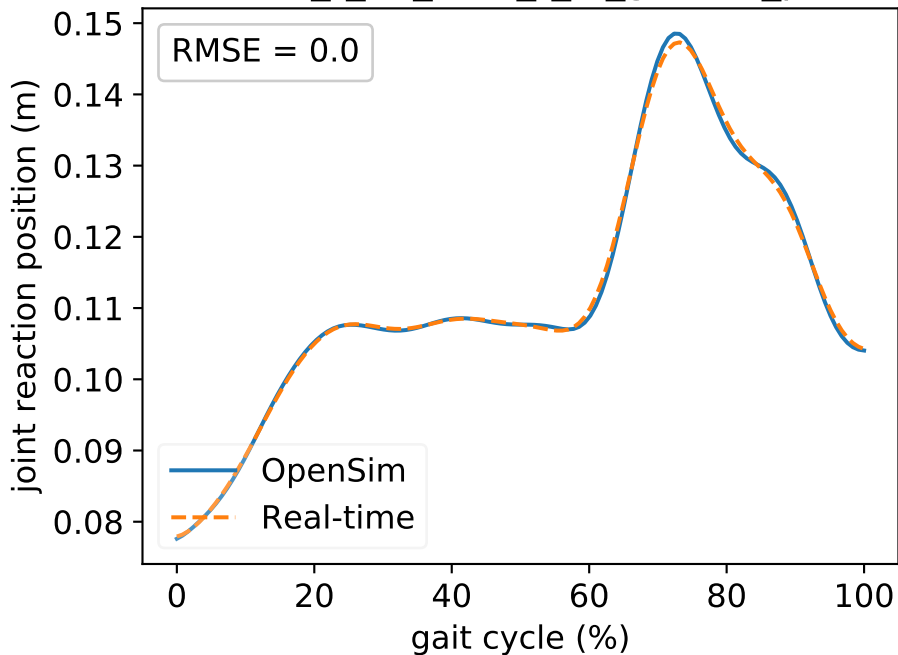

# ankle\_r\_on\_talus\_r\_in\_ground\_fx

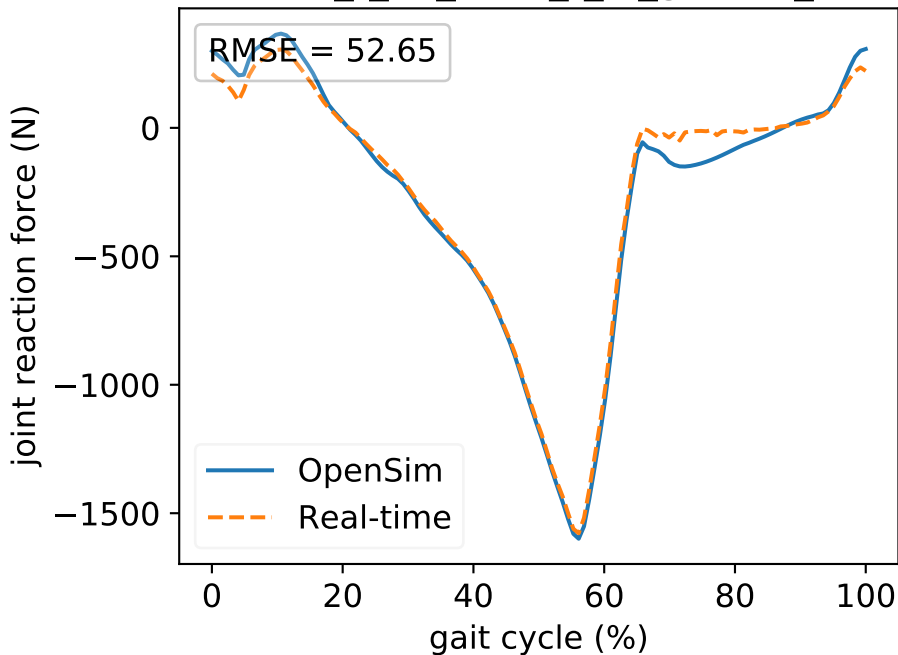

# ankle\_r\_on\_talus\_r\_in\_ground\_fy

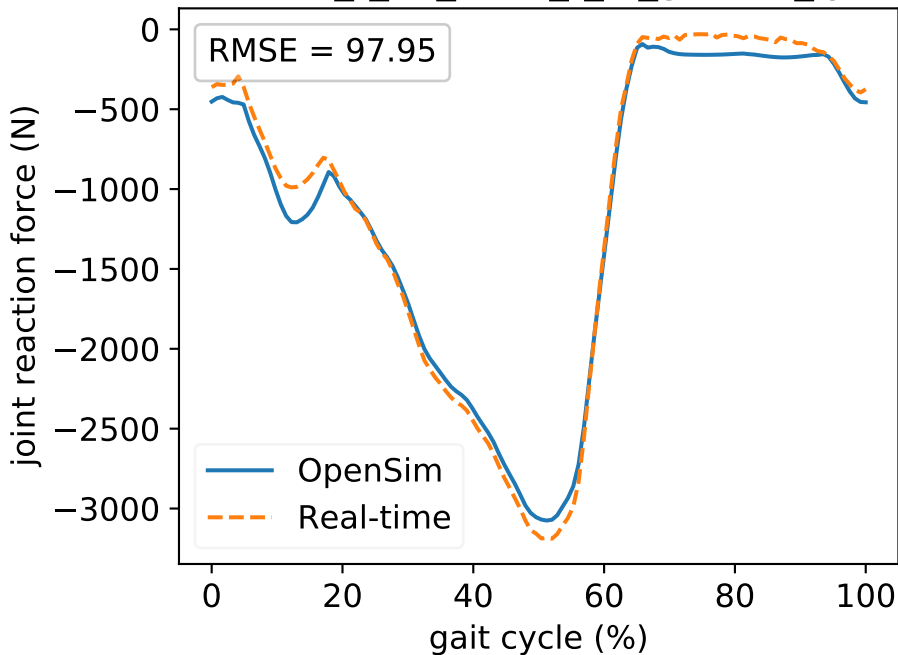

# ankle\_r\_on\_talus\_r\_in\_ground\_fz

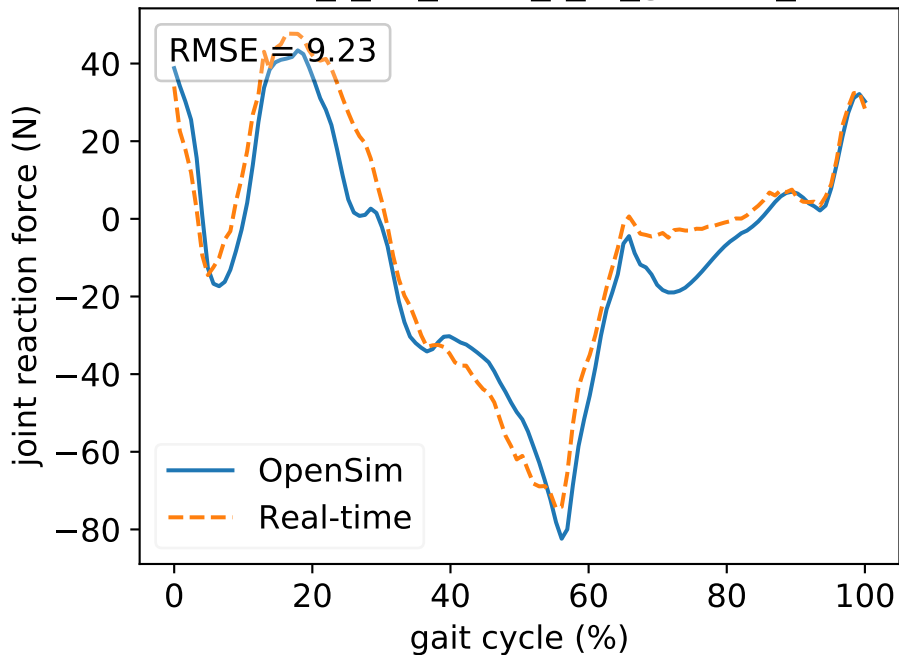

# ankle\_r\_on\_talus\_r\_in\_ground\_mx

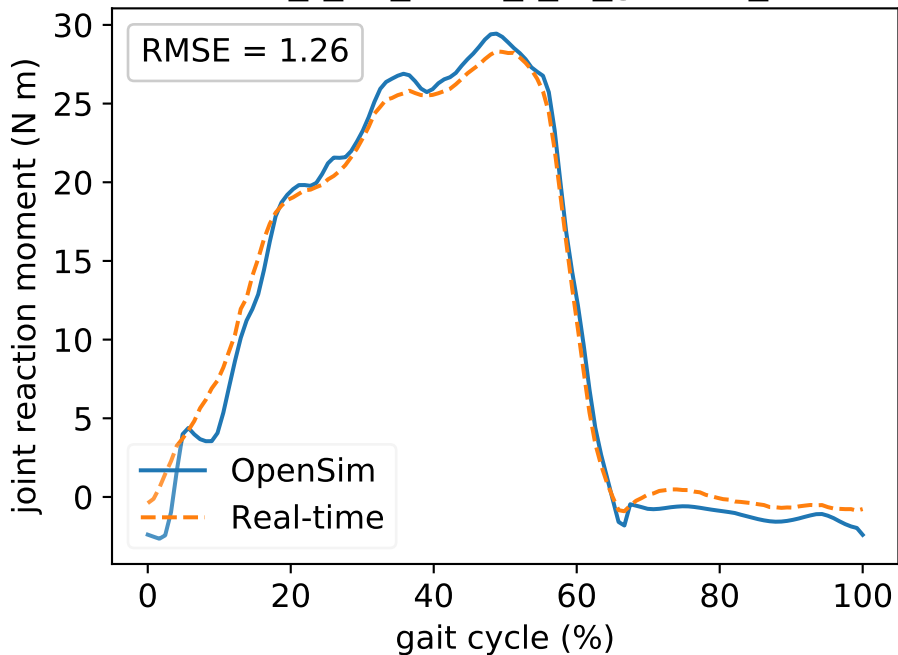

# ankle\_r\_on\_talus\_r\_in\_ground\_my

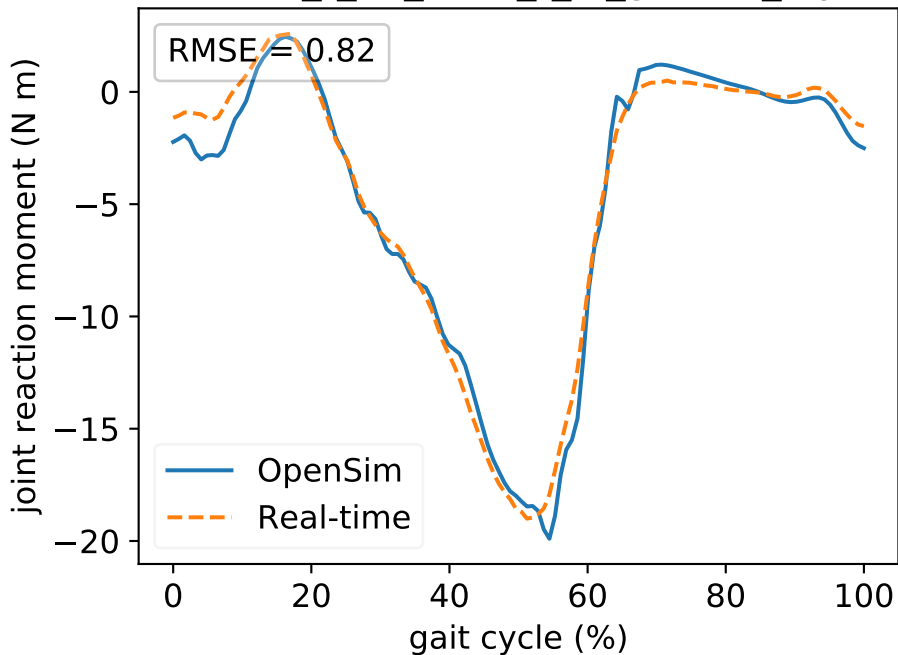



# ankle\_r\_on\_talus\_r\_in\_ground\_mz

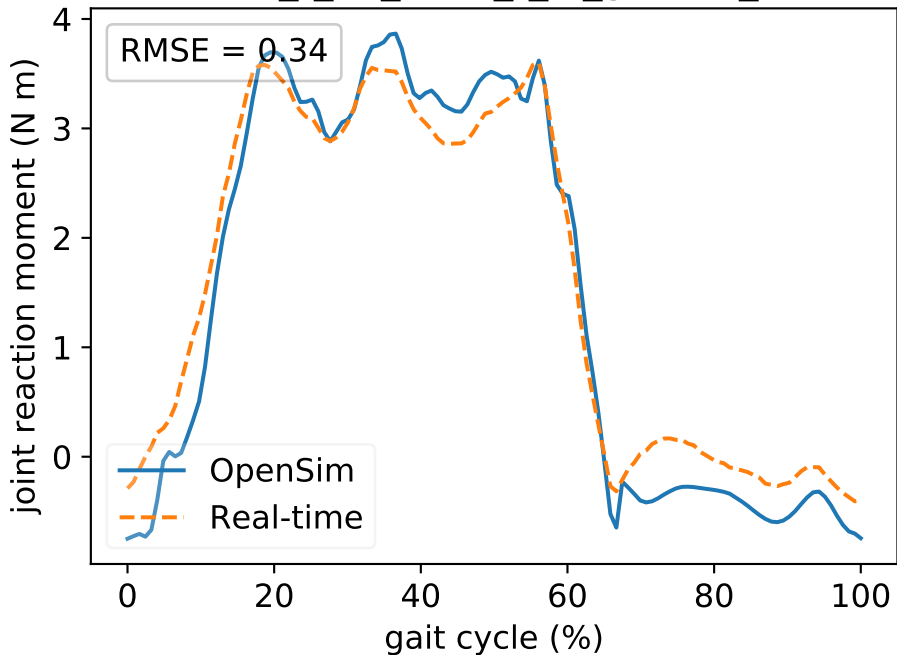

# ankle\_r\_on\_talus\_r\_in\_ground\_px

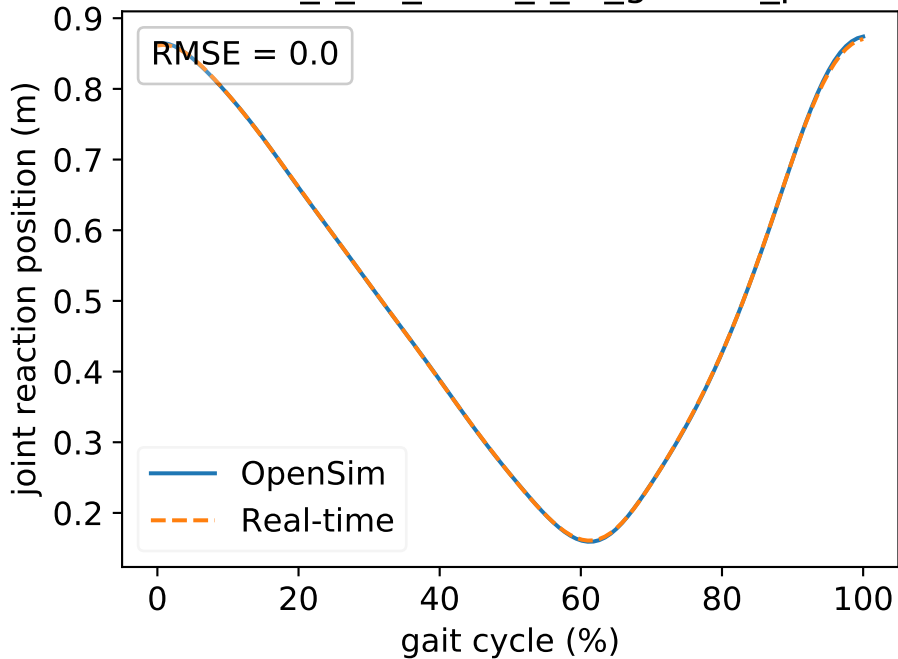

ankle\_r\_on\_talus\_r\_in\_ground\_py

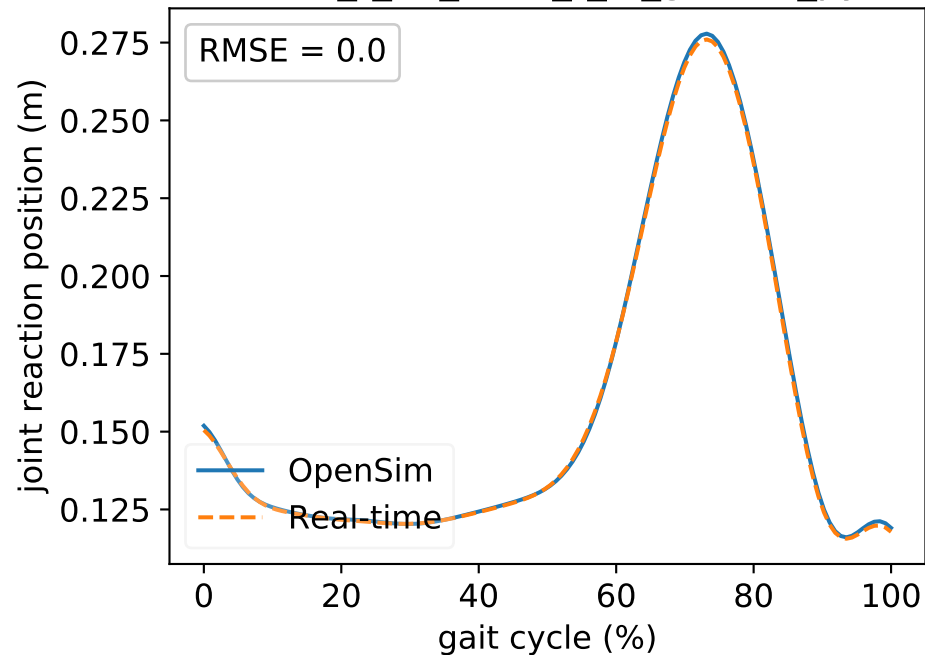

# ankle\_r\_on\_talus\_r\_in\_ground\_pz

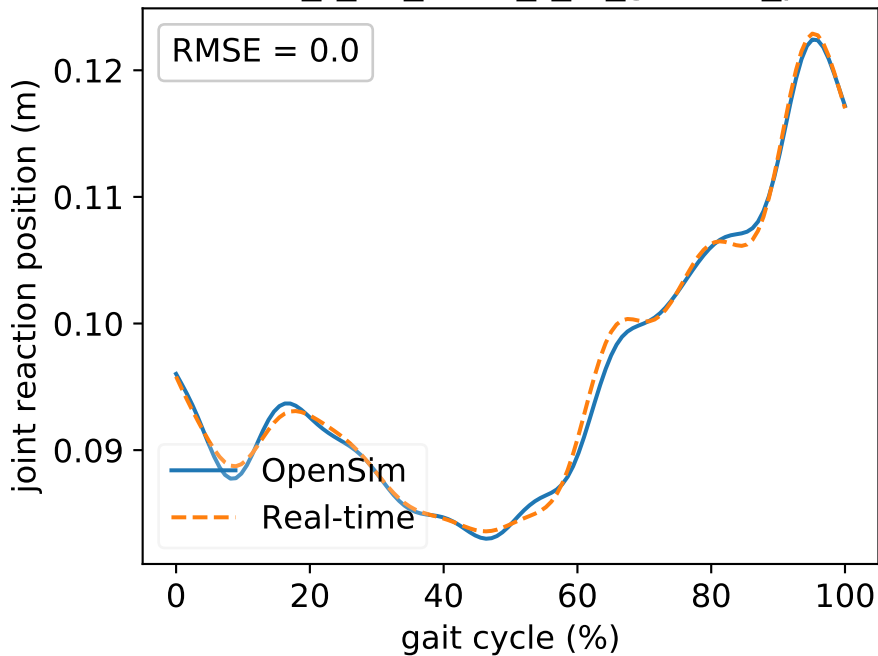

# subtalar\_r\_on\_calcn\_r\_in\_ground\_fx

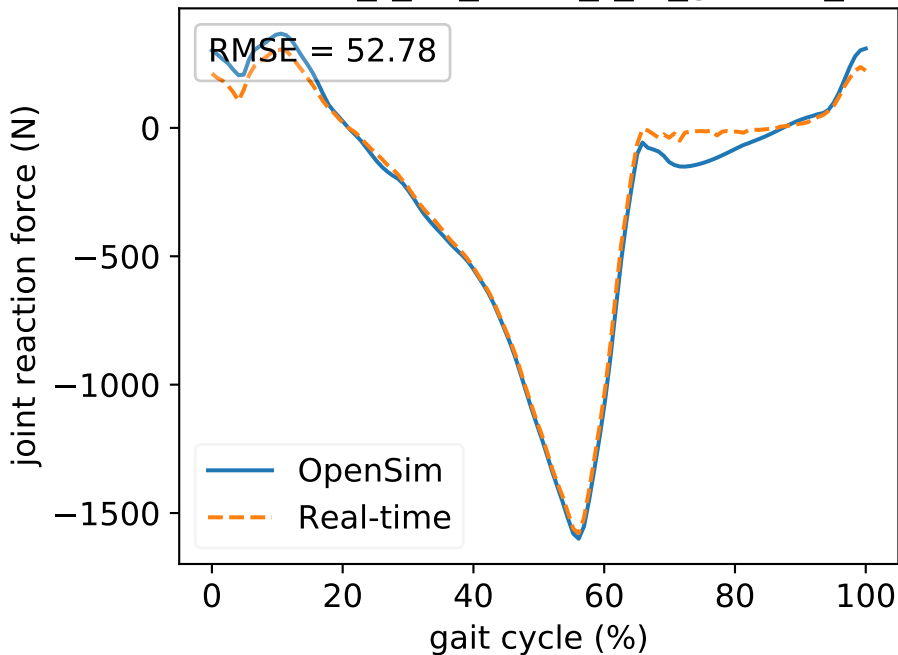

# subtalar\_r\_on\_calcn\_r\_in\_ground\_fy

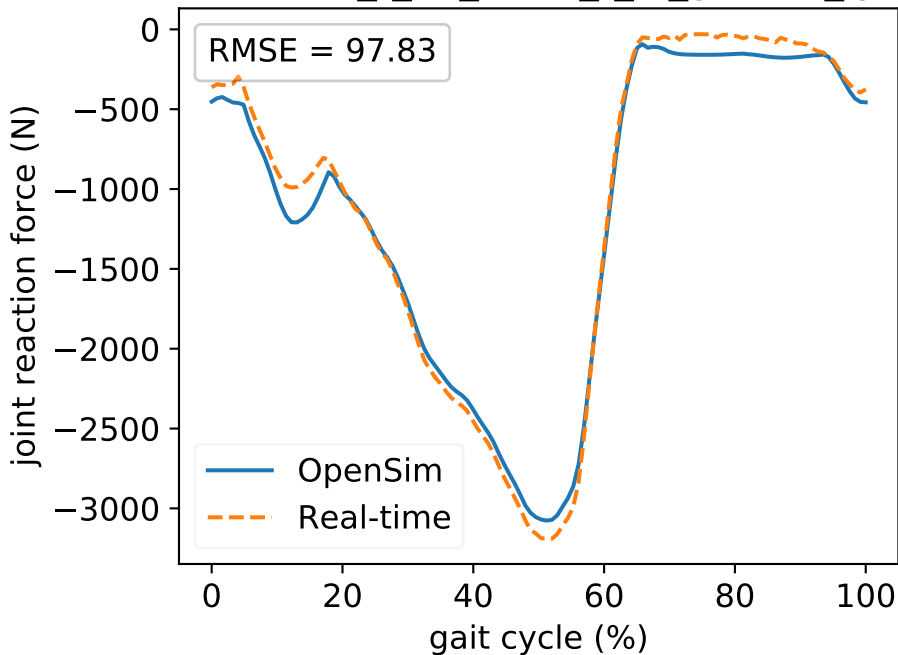

# subtalar\_r\_on\_calcn\_r\_in\_ground\_fz

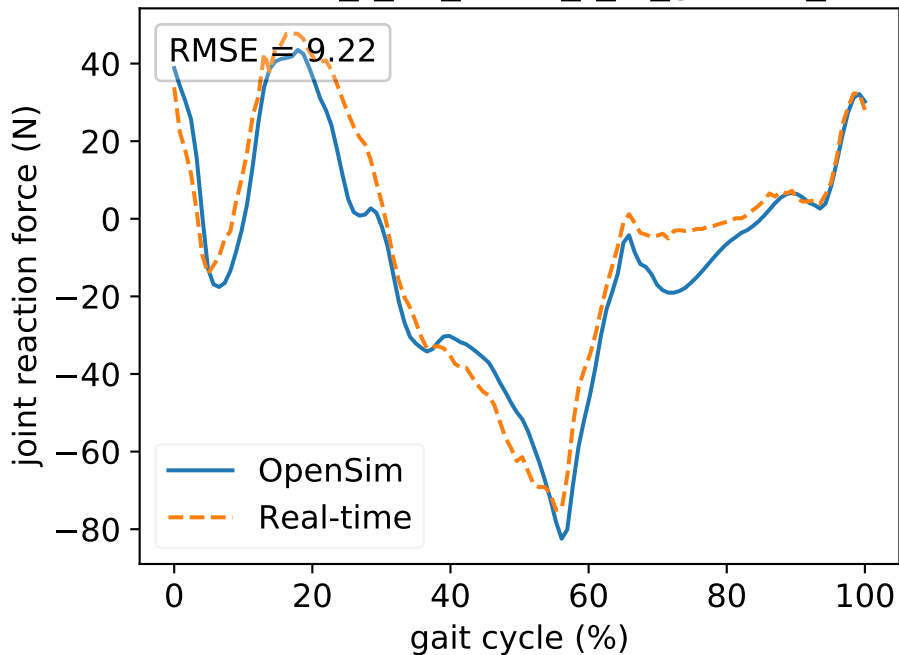

# subtalar\_r\_on\_calcn\_r\_in\_ground\_mx

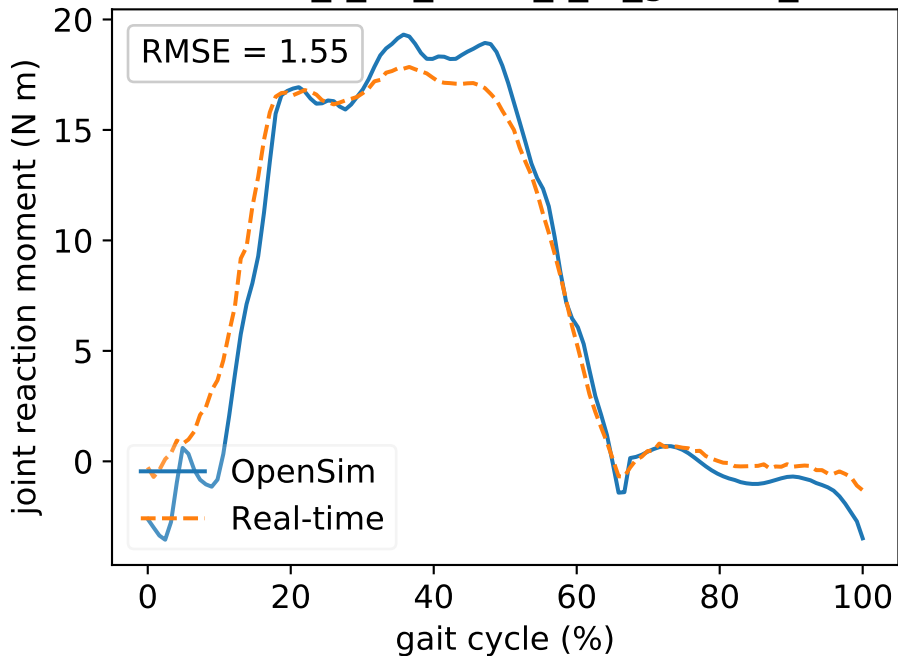



# subtalar\_r\_on\_calcn\_r\_in\_ground\_my

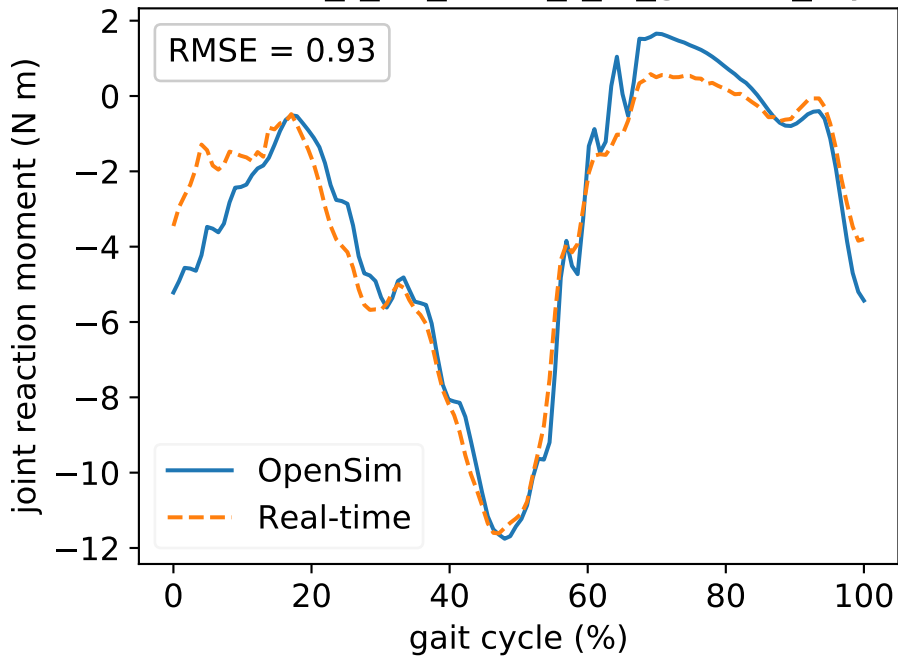

# subtalar\_r\_on\_calcn\_r\_in\_ground\_mz

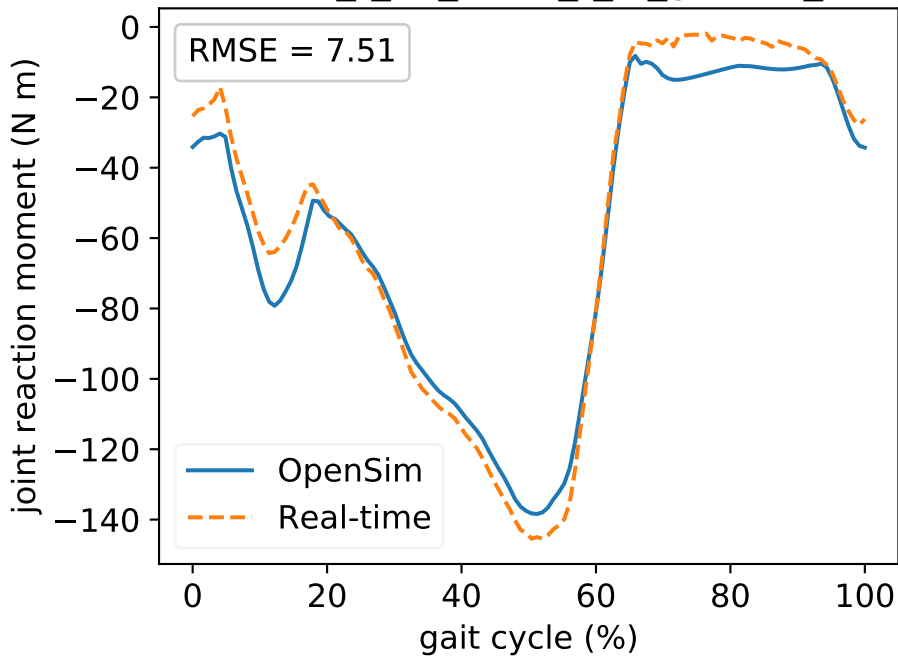

# subtalar\_r\_on\_calcn\_r\_in\_ground\_px

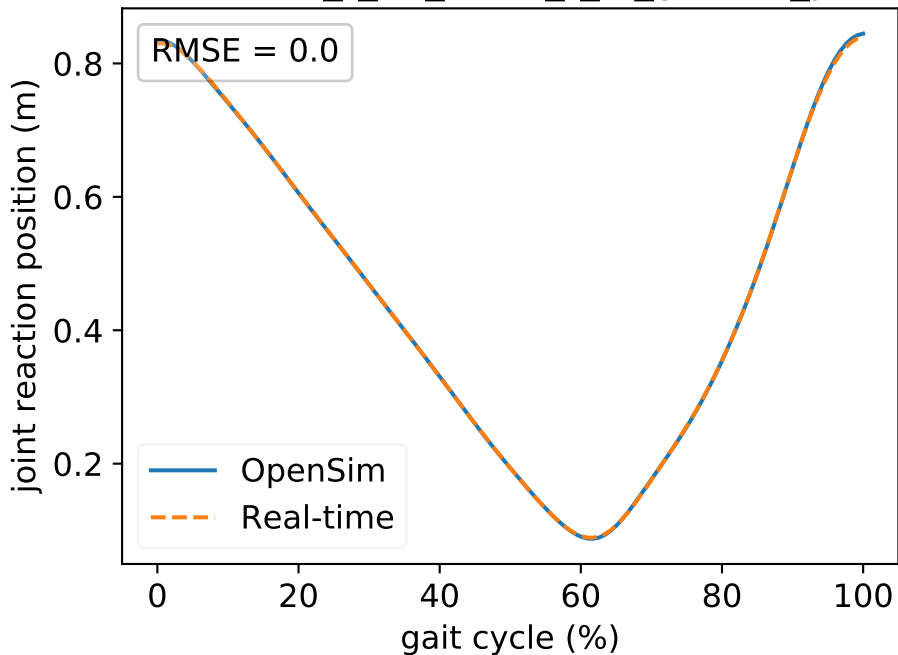

# subtalar\_r\_on\_calcn\_r\_in\_ground\_py

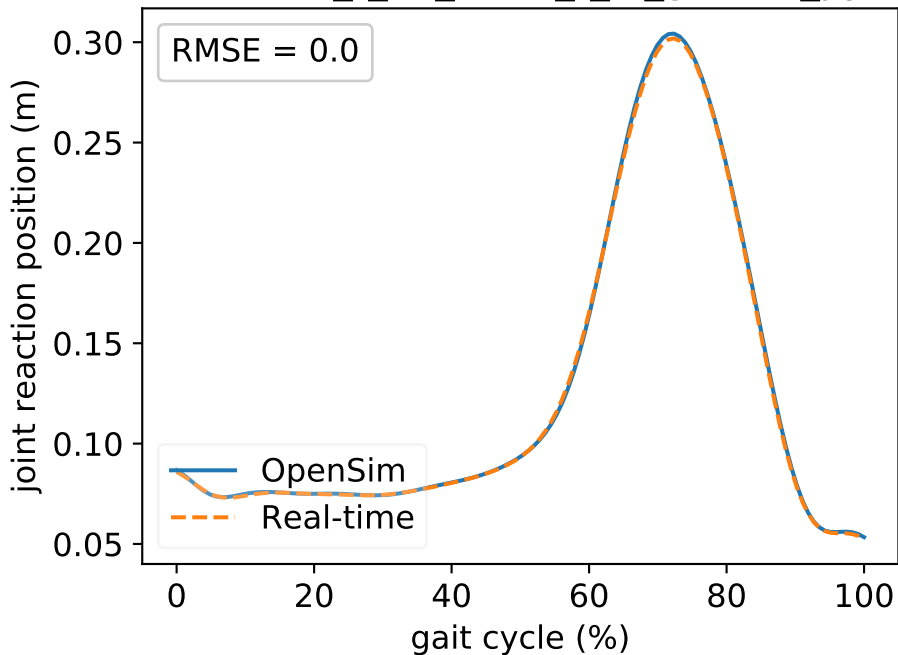

# subtalar\_r\_on\_calcn\_r\_in\_ground\_pz

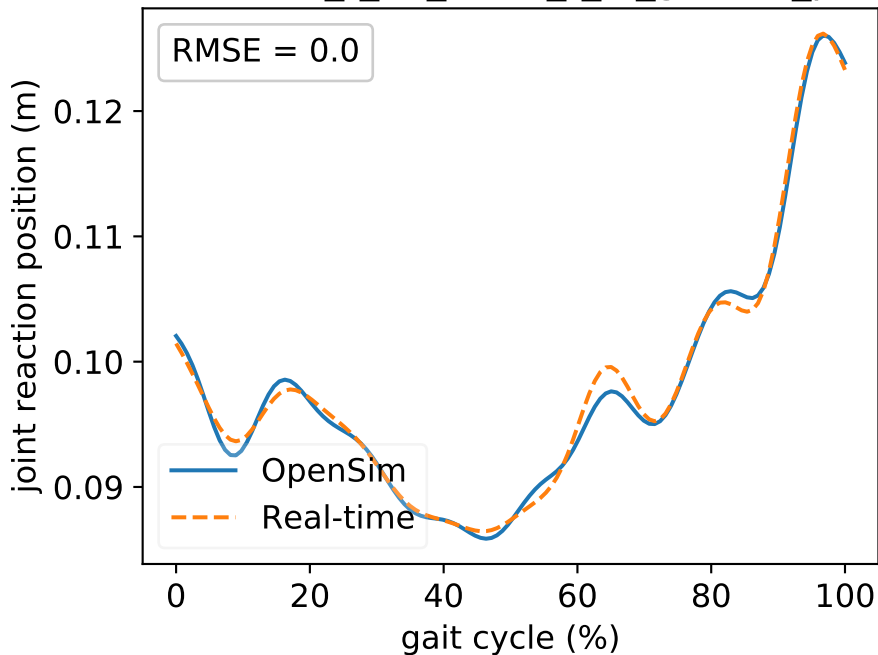

# mtp\_r\_on\_toes\_r\_in\_ground\_fx

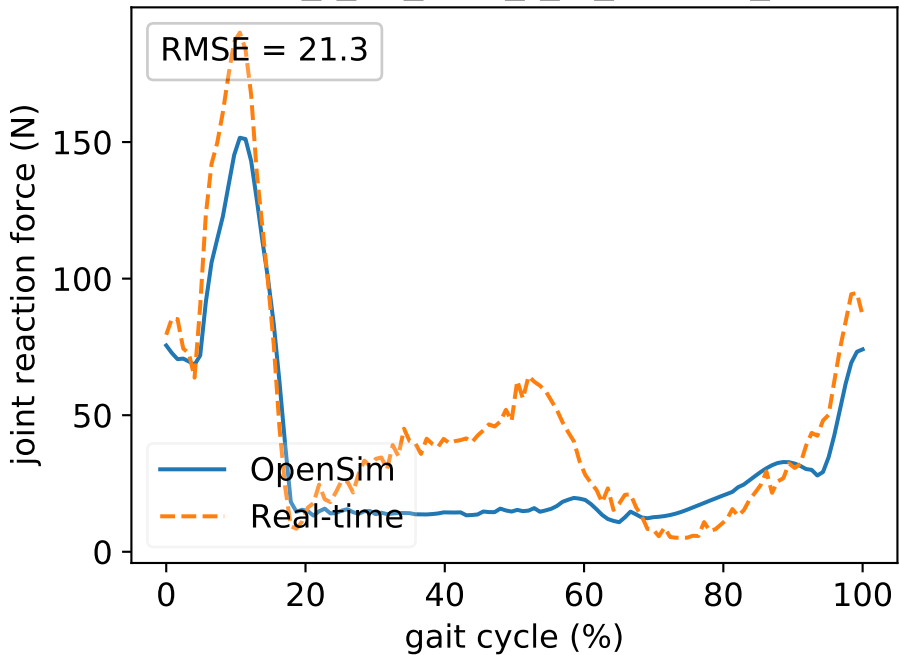

mtp\_r\_on\_toes\_r\_in\_ground\_fy

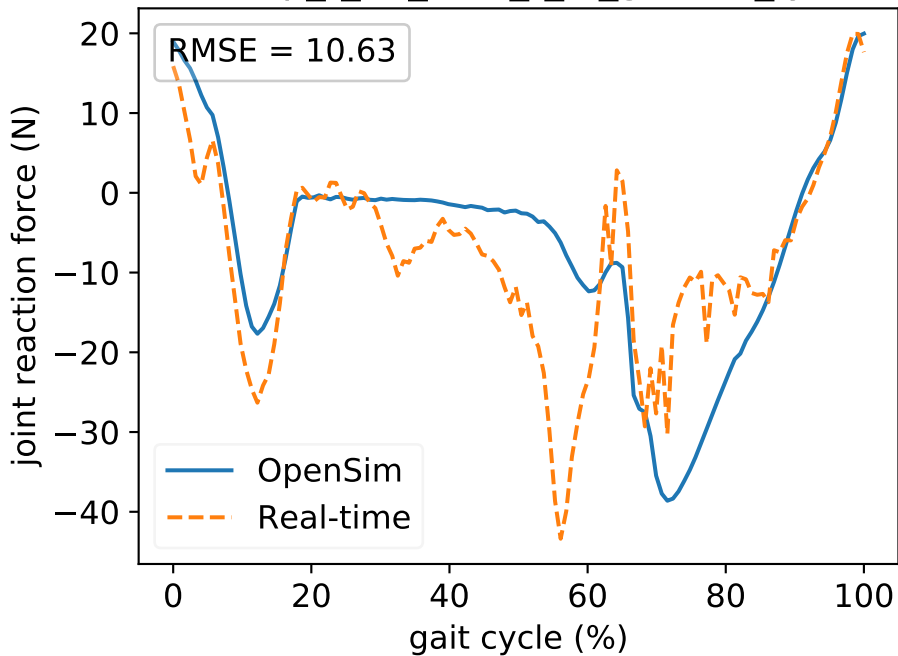

# mtp\_r\_on\_toes\_r\_in\_ground\_fz

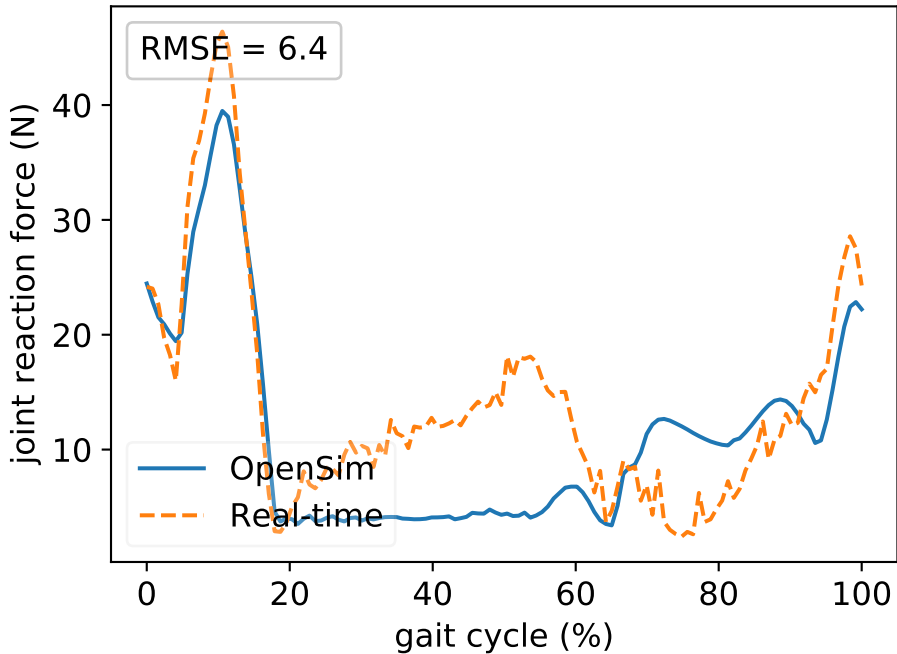



# mtp\_r\_on\_toes\_r\_in\_ground\_mx

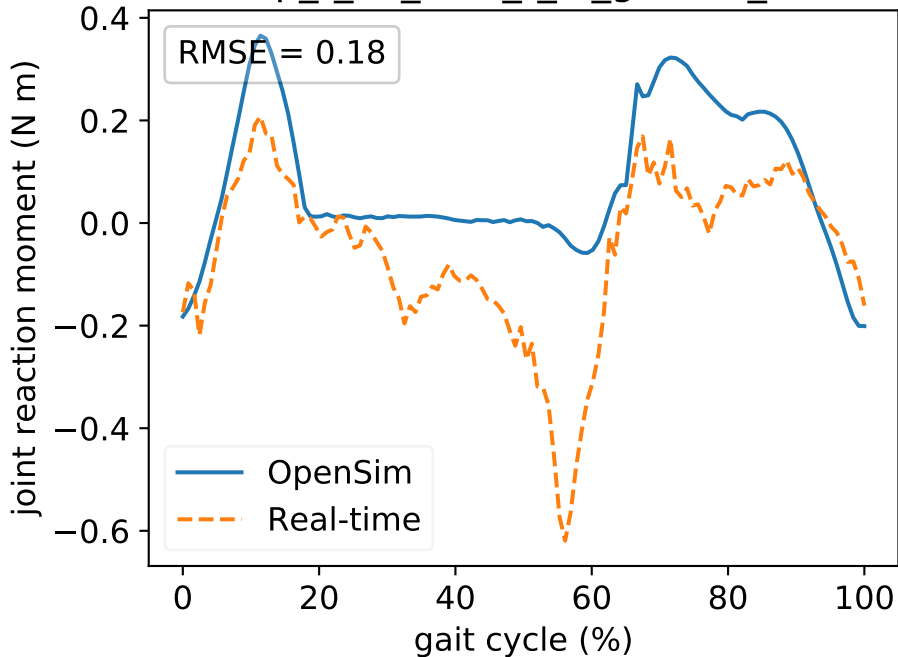

# mtp\_r\_on\_toes\_r\_in\_ground\_my

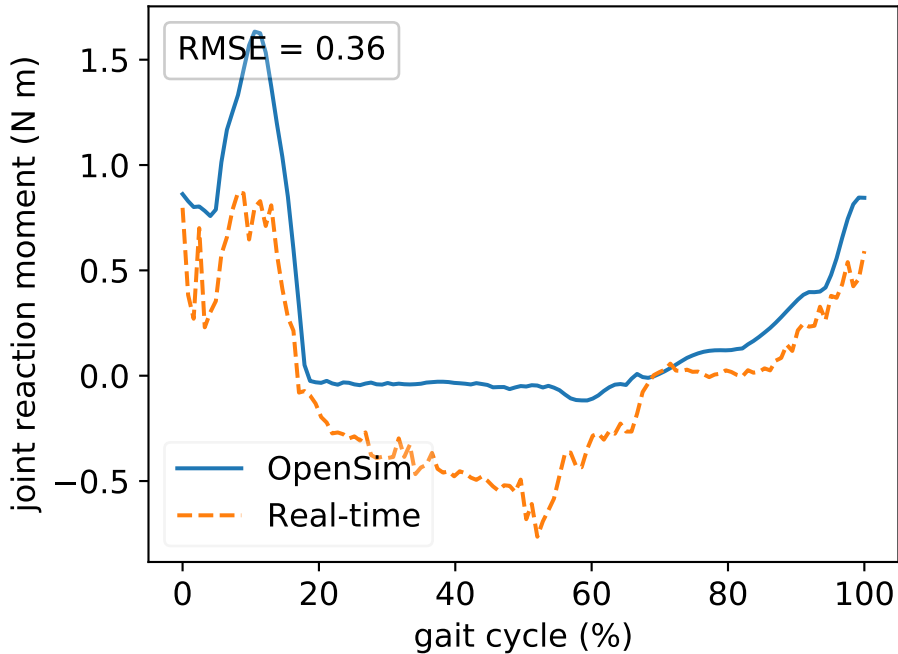

# mtp\_r\_on\_toes\_r\_in\_ground\_mz

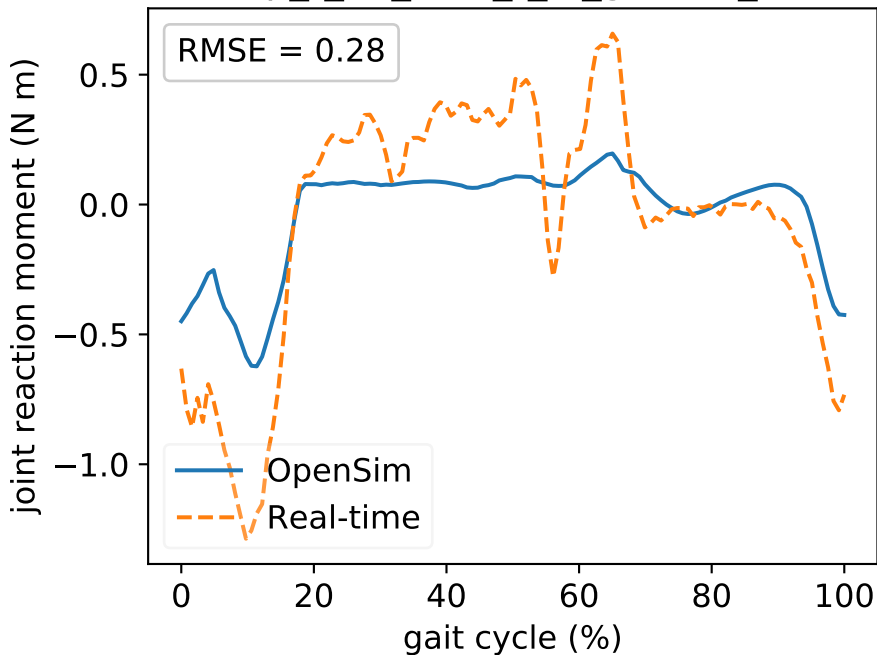

# mtp\_r\_on\_toes\_r\_in\_ground\_px

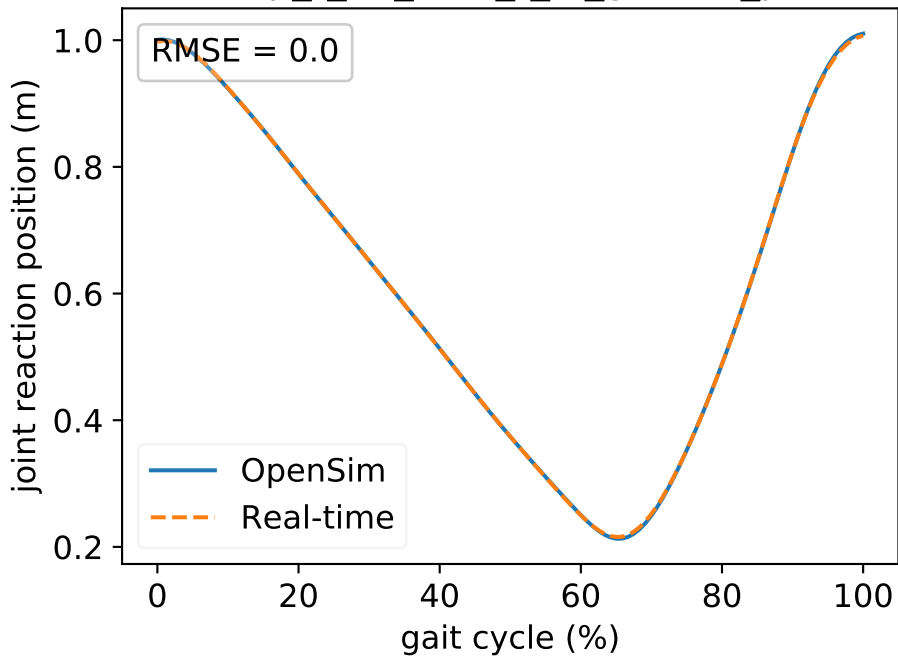

# mtp\_r\_on\_toes\_r\_in\_ground\_py

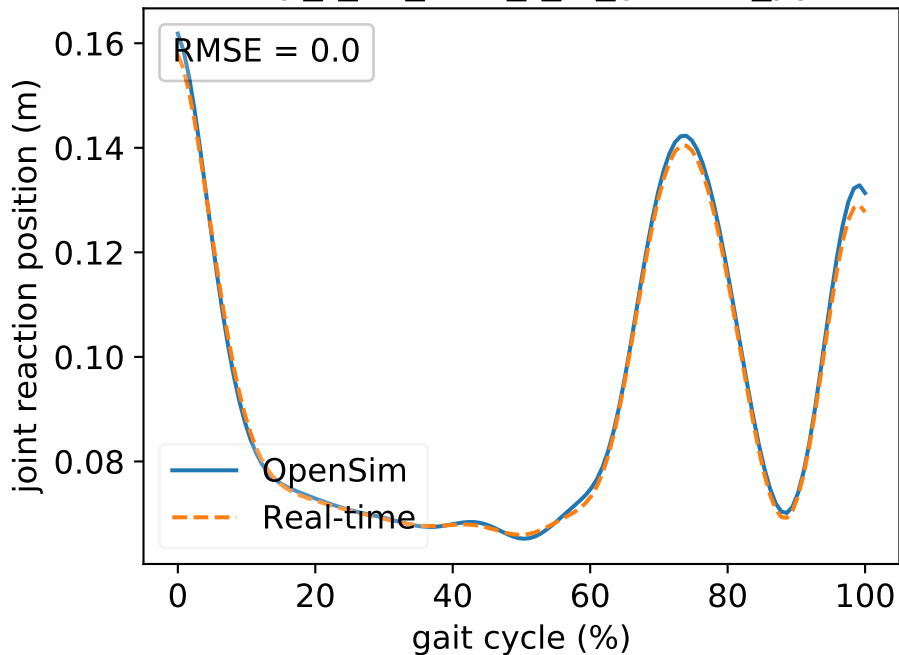

# mtp\_r\_on\_toes\_r\_in\_ground\_pz

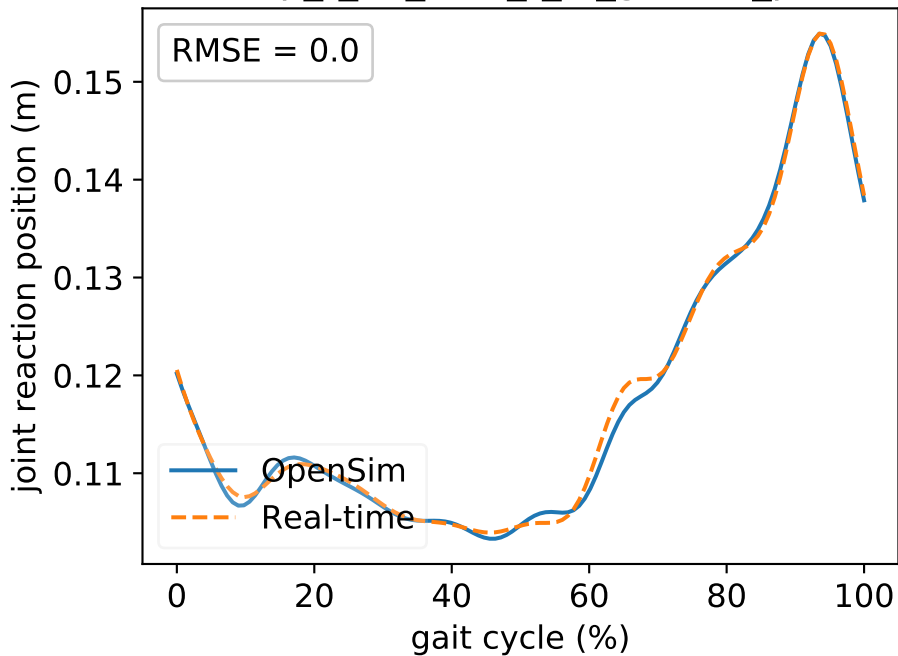

# hip\_l\_on\_femur\_l\_in\_ground\_fx

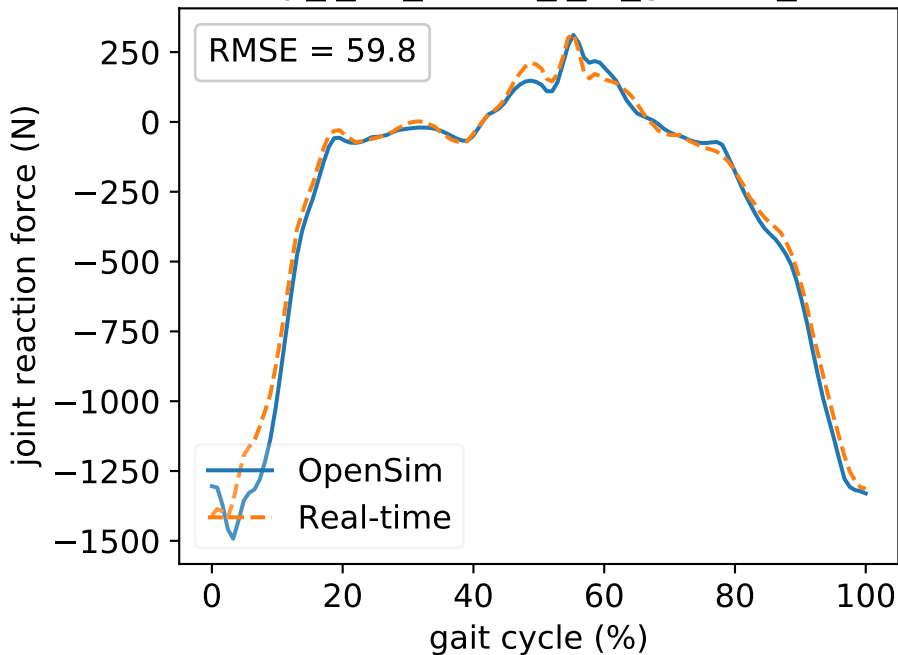

# hip\_l\_on\_femur\_l\_in\_ground\_fy

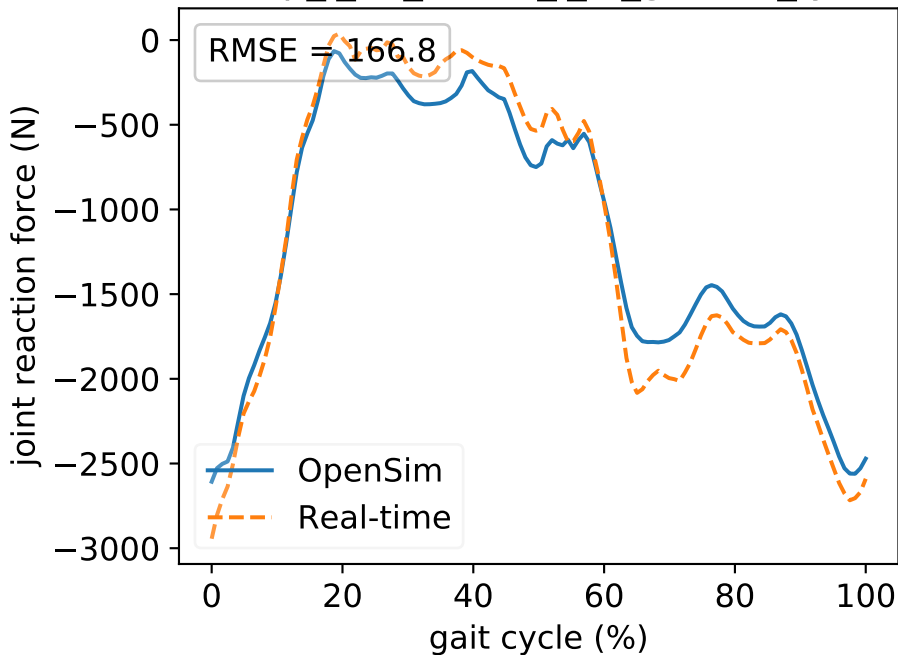



# hip\_l\_on\_femur\_l\_in\_ground\_fz

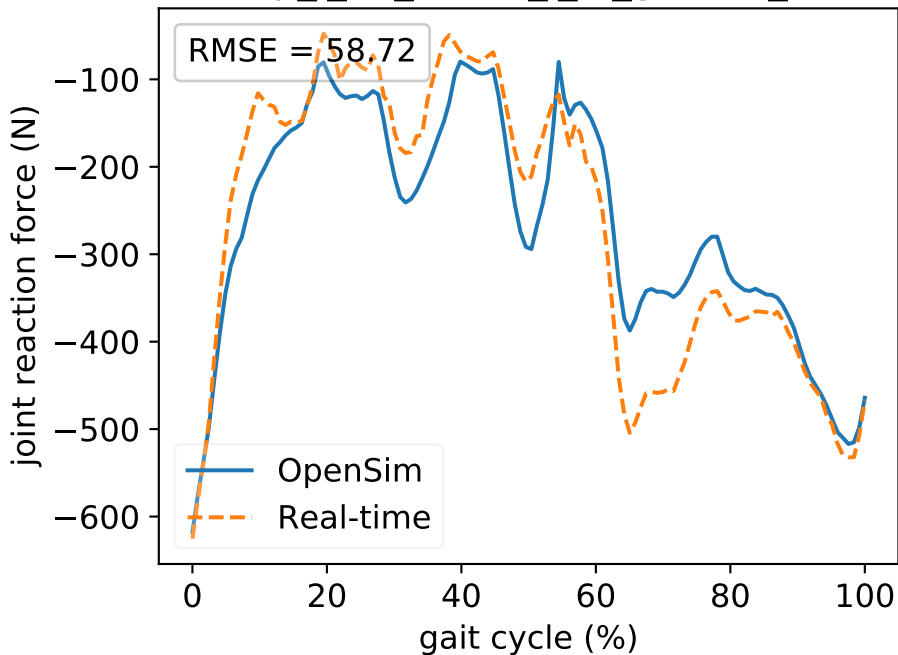

# hip\_l\_on\_femur\_l\_in\_ground\_mx

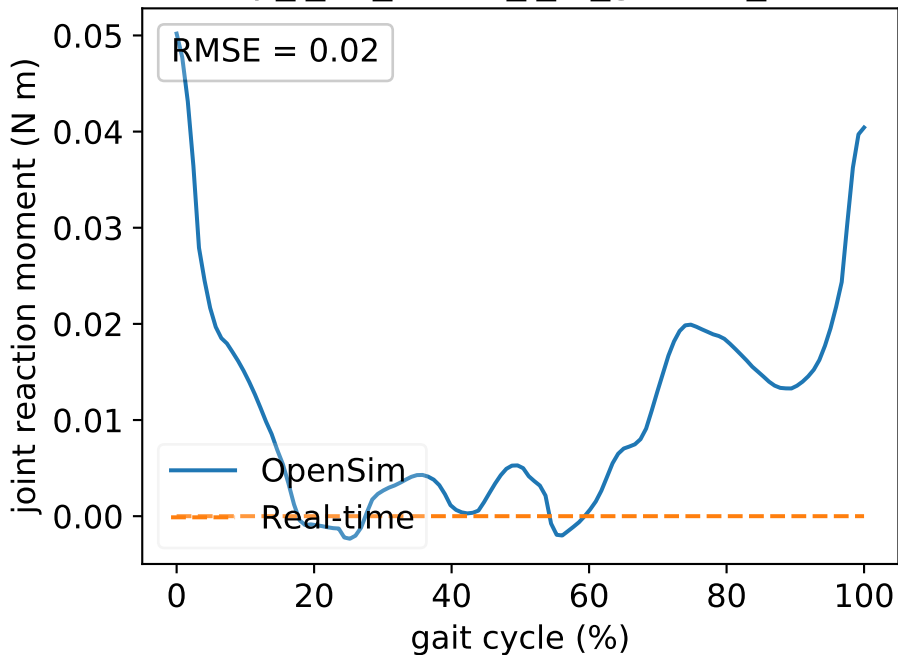

# hip\_l\_on\_femur\_l\_in\_ground\_my

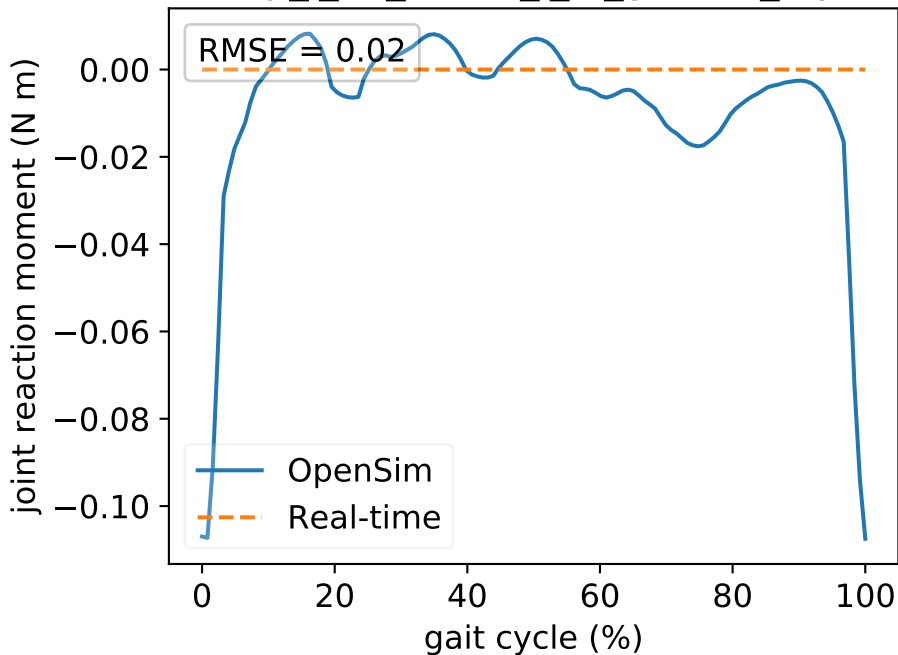

# hip\_l\_on\_femur\_l\_in\_ground\_mz

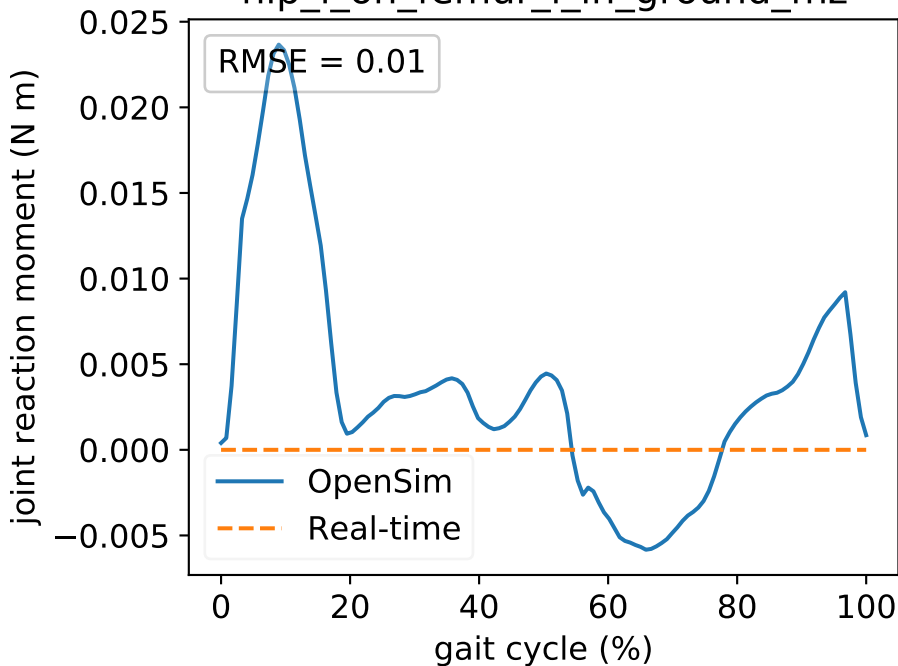

# hip\_l\_on\_femur\_l\_in\_ground\_px

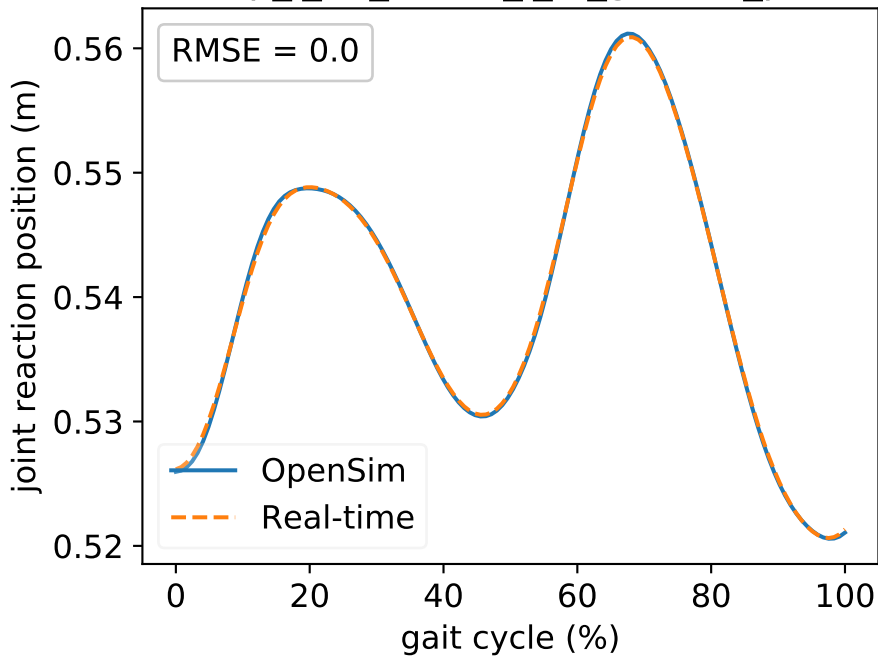

# hip\_l\_on\_femur\_l\_in\_ground\_py

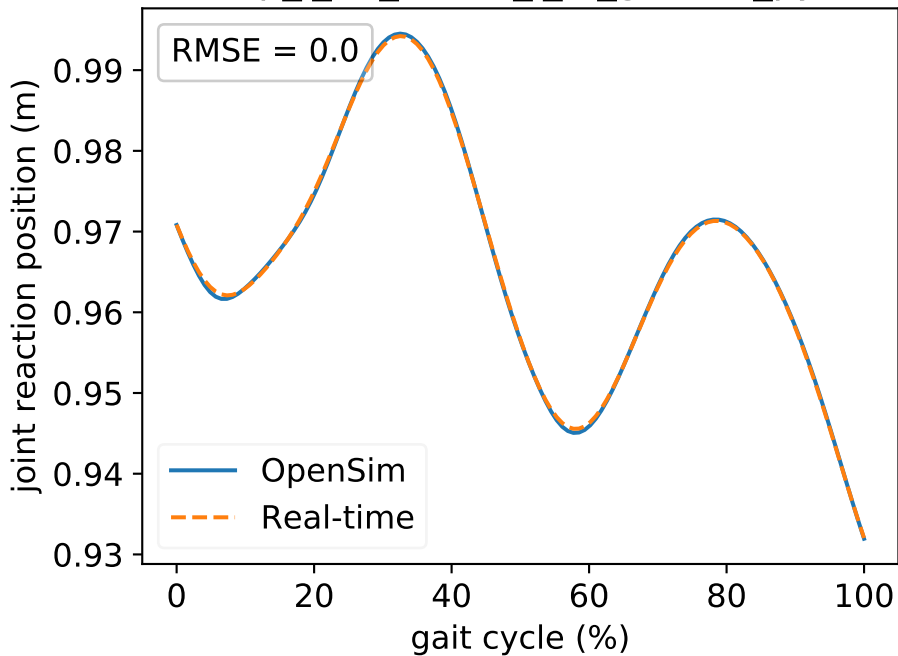

# hip\_l\_on\_femur\_l\_in\_ground\_pz

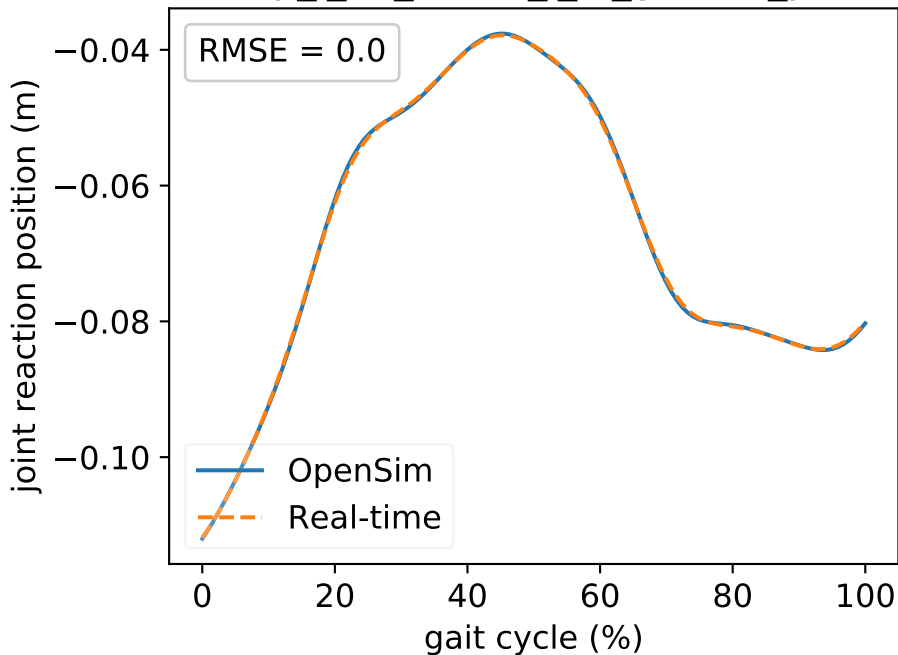

# knee\_l\_on\_tibia\_l\_in\_ground\_fx

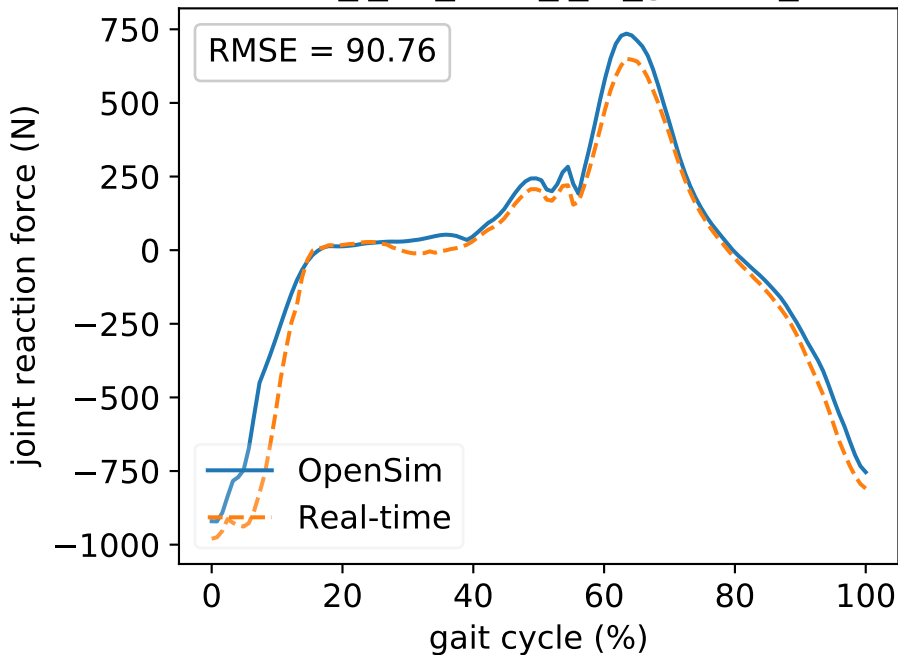



# knee\_l\_on\_tibia\_l\_in\_ground\_fy

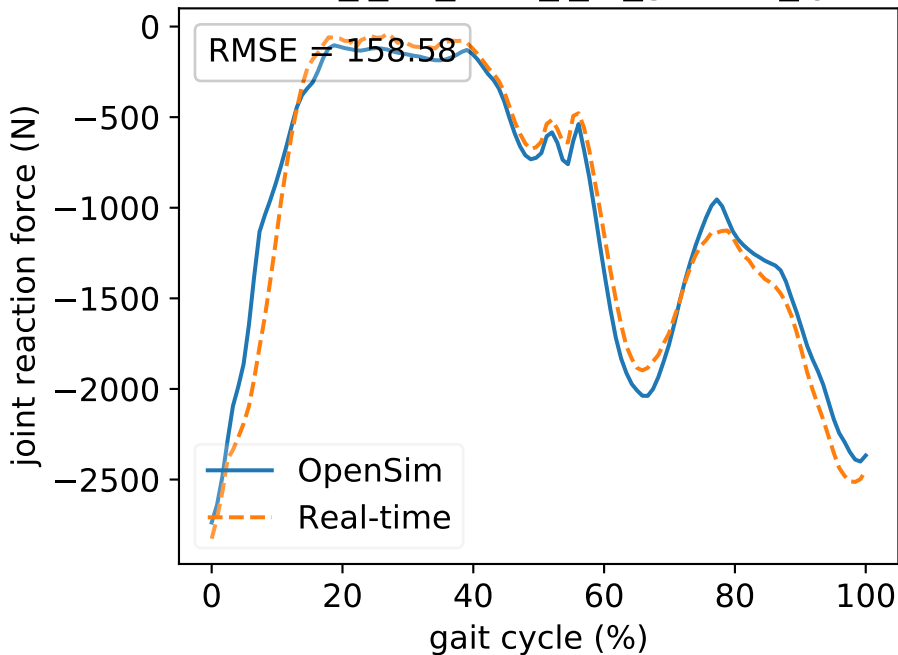

# knee\_l\_on\_tibia\_l\_in\_ground\_fz

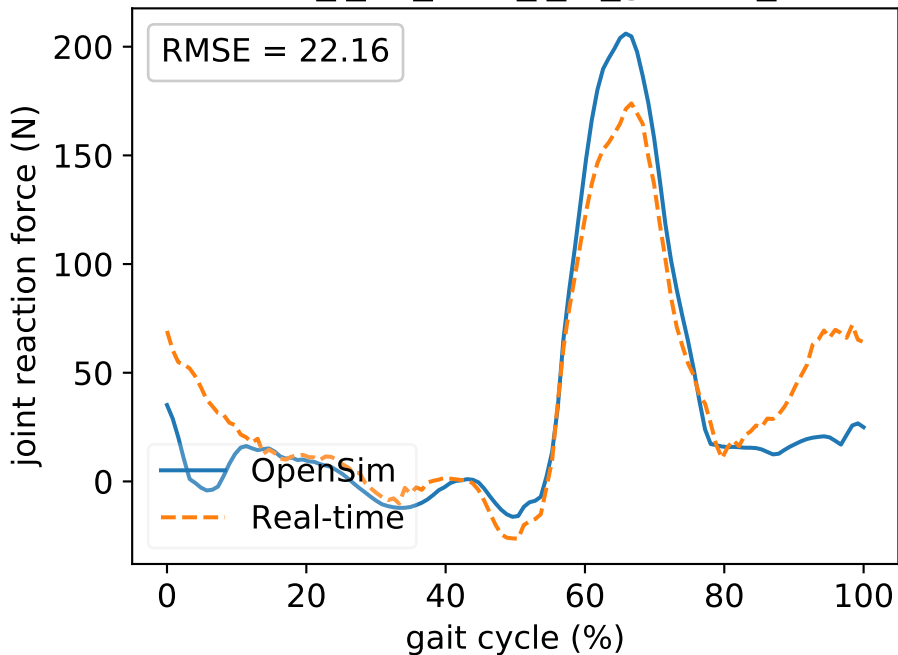

# knee\_l\_on\_tibia\_l\_in\_ground\_mx

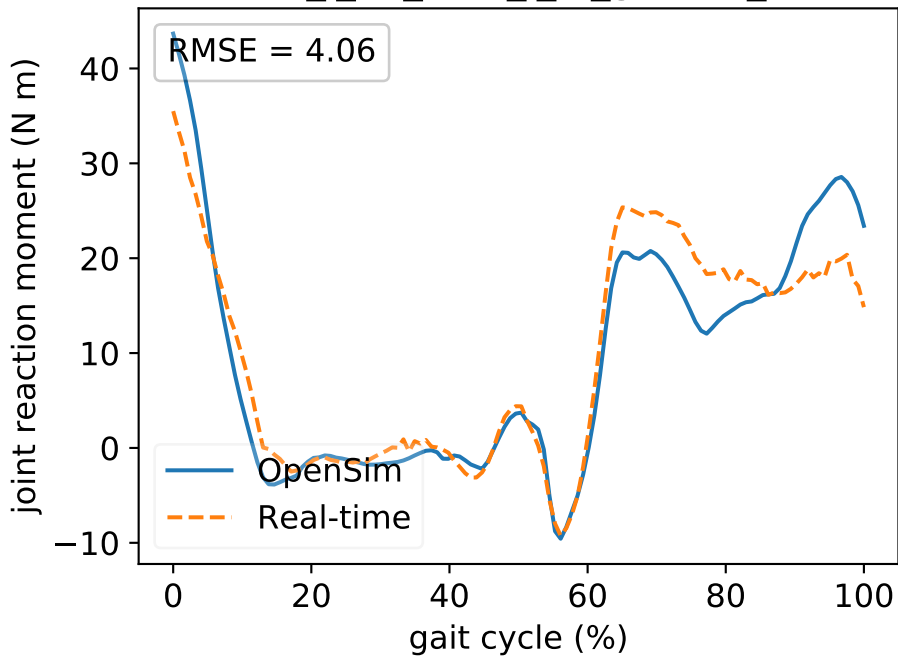

# knee\_l\_on\_tibia\_l\_in\_ground\_my

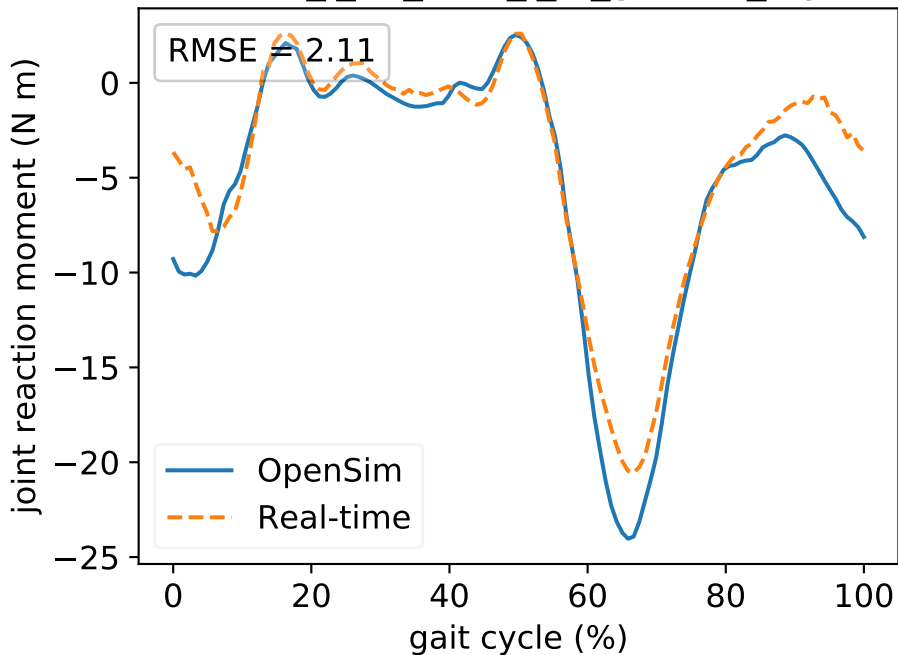

# knee\_l\_on\_tibia\_l\_in\_ground\_mz

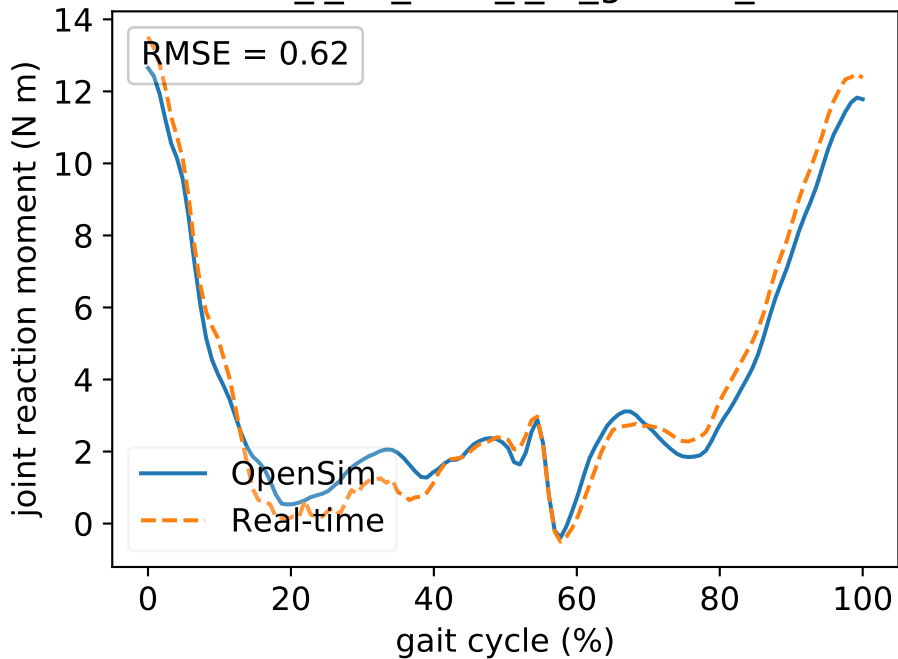

# knee\_l\_on\_tibia\_l\_in\_ground\_px

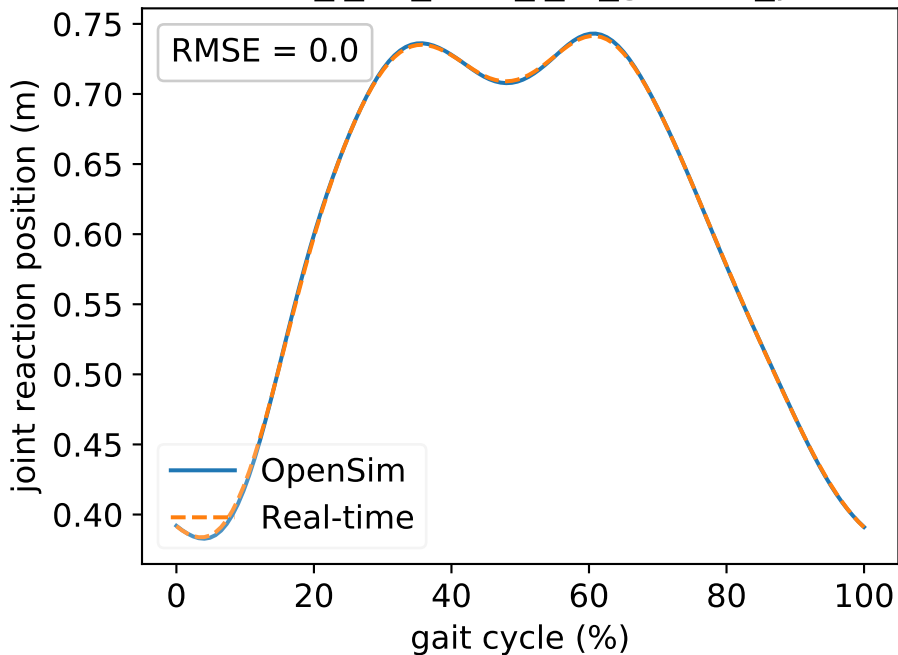

# knee\_l\_on\_tibia\_l\_in\_ground\_py

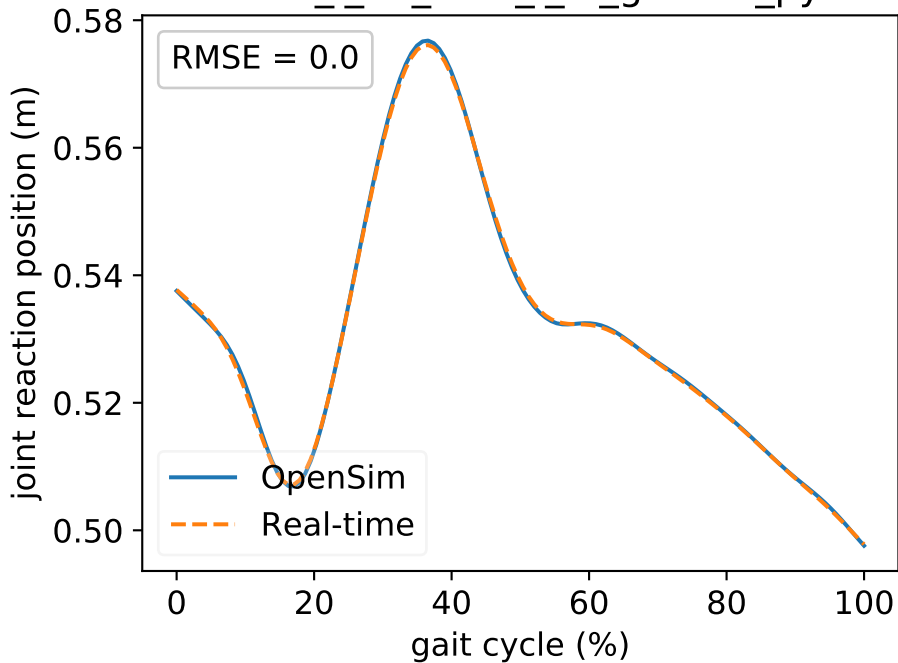

# knee\_l\_on\_tibia\_l\_in\_ground\_pz

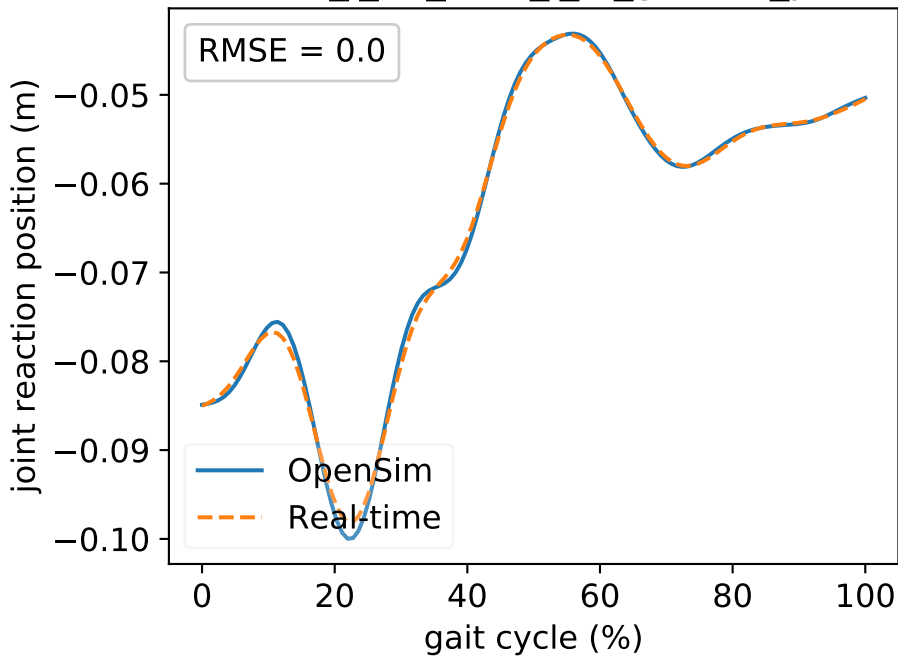



# ankle\_l\_on\_talus\_l\_in\_ground\_fx

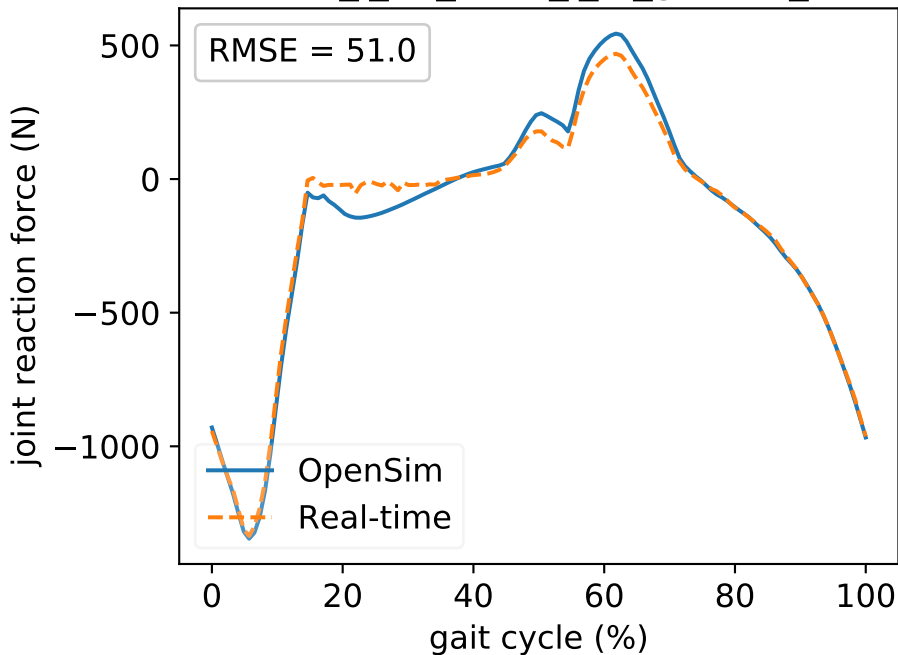

# ankle\_l\_on\_talus\_l\_in\_ground\_fy

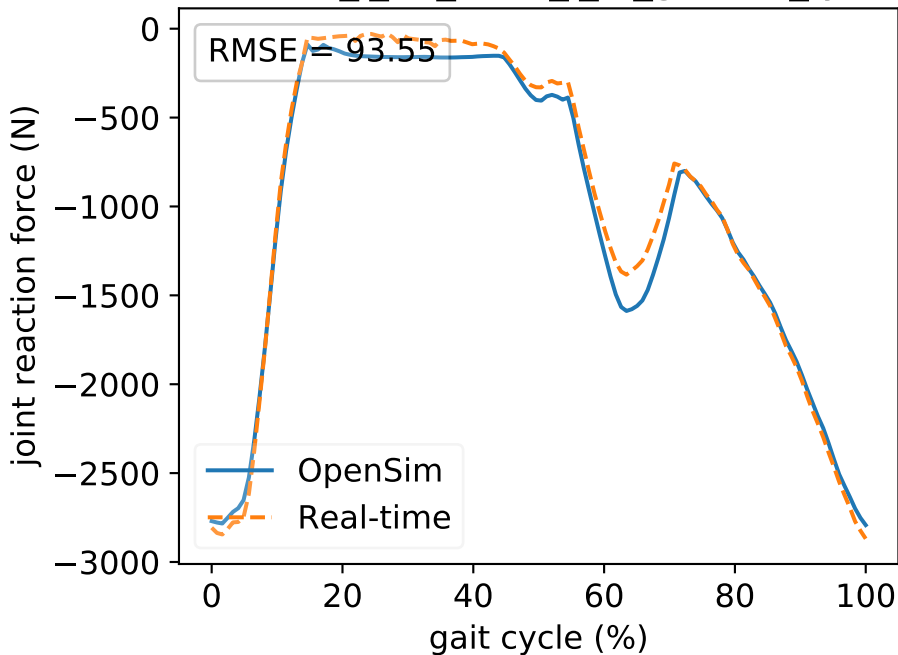

# ankle\_l\_on\_talus\_l\_in\_ground\_fz

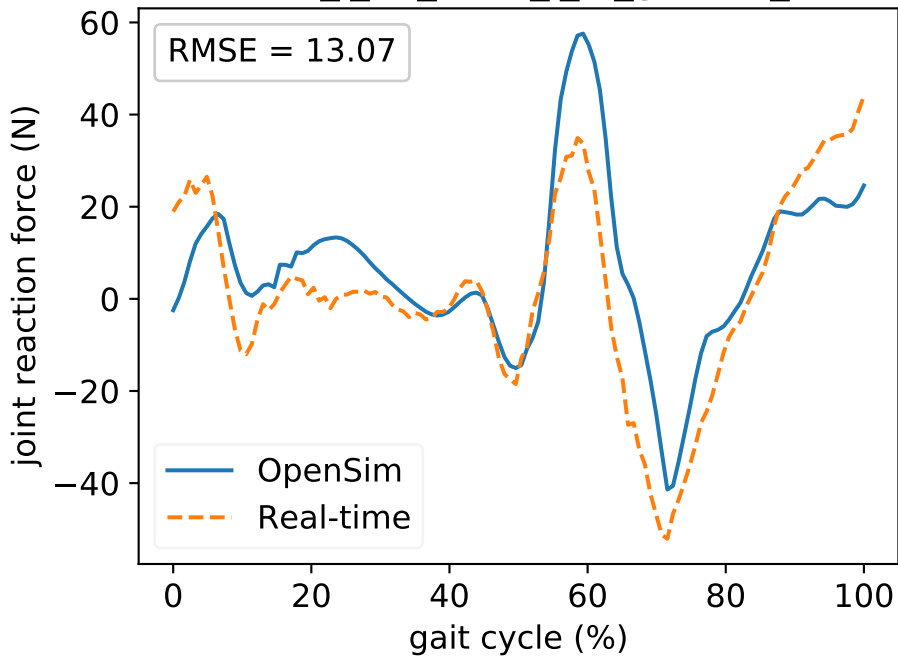

# ankle\_l\_on\_talus\_l\_in\_ground\_mx

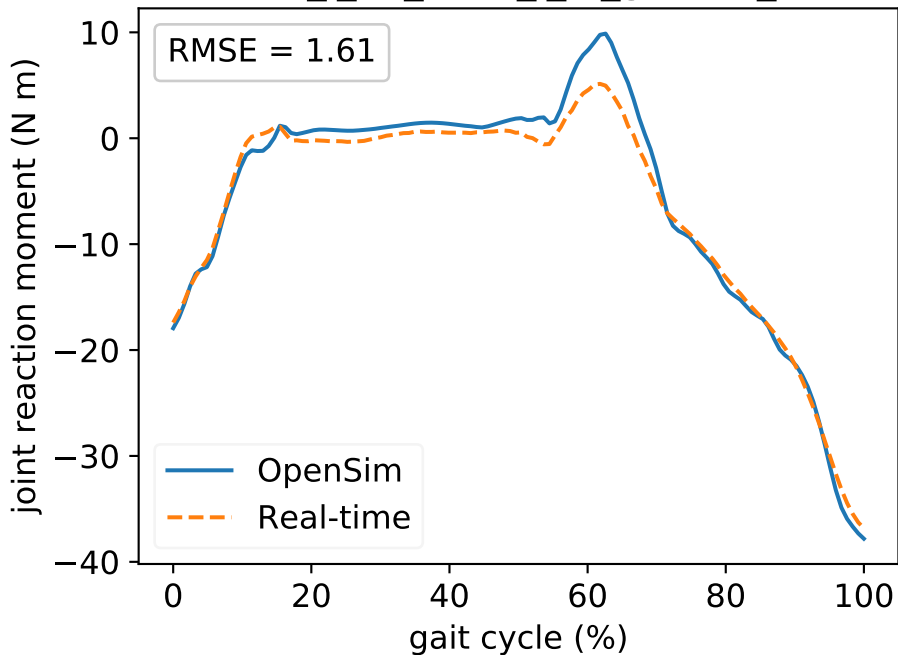

# ankle\_l\_on\_talus\_l\_in\_ground\_my

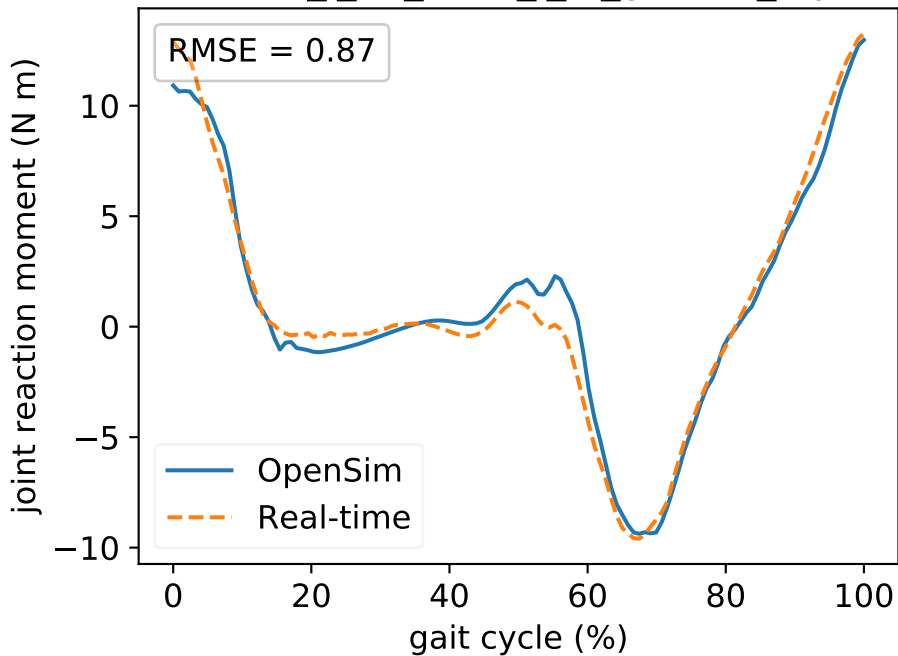

# ankle\_l\_on\_talus\_l\_in\_ground\_mz

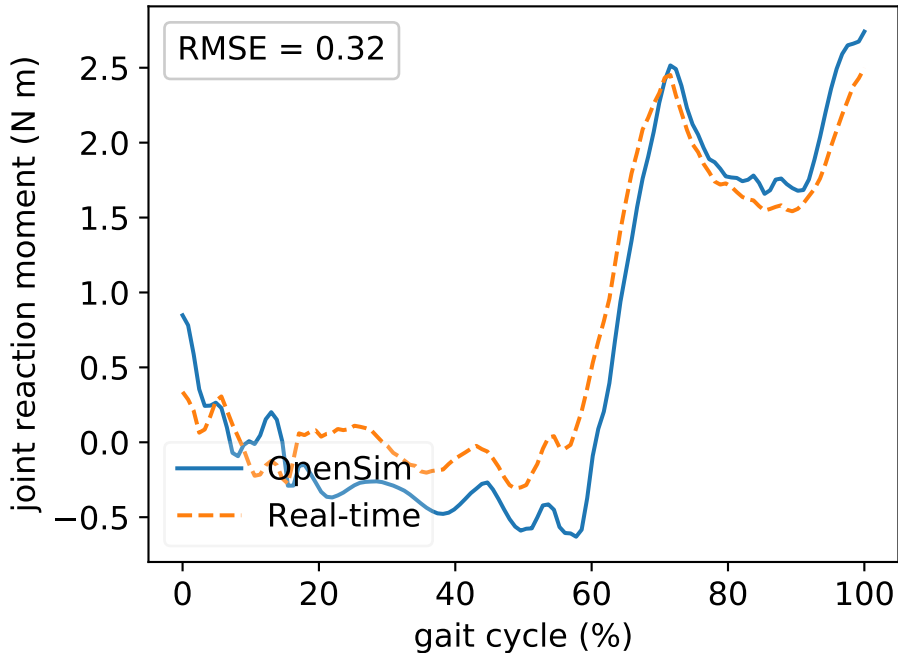

# ankle\_l\_on\_talus\_l\_in\_ground\_px

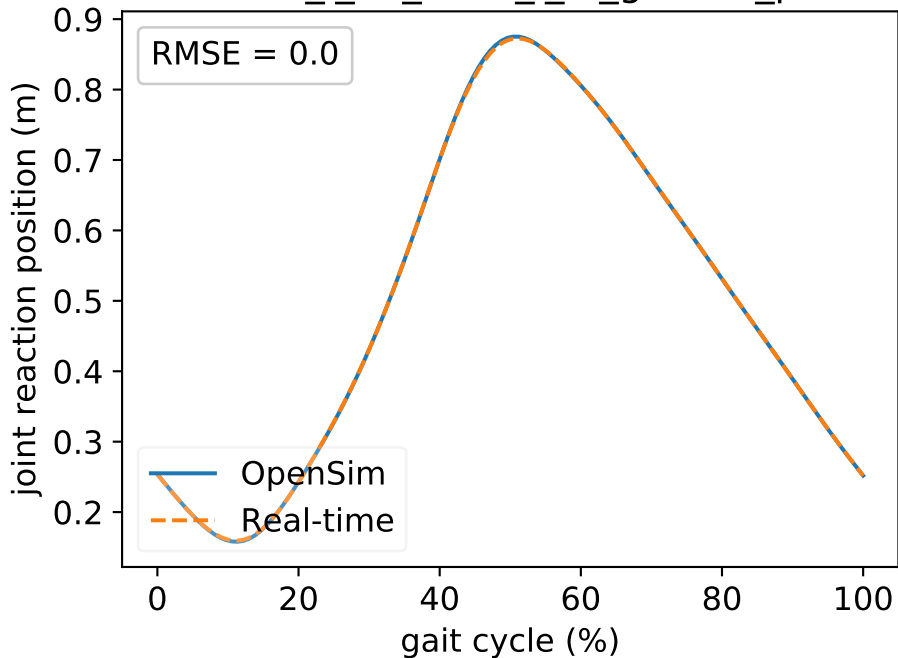

# ankle\_l\_on\_talus\_l\_in\_ground\_py

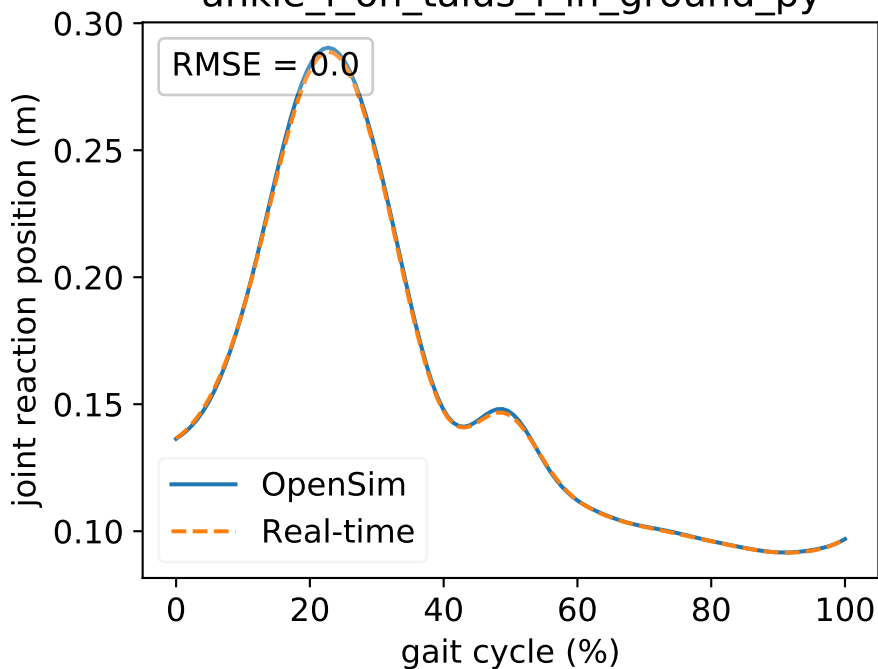



# ankle\_l\_on\_talus\_l\_in\_ground\_pz

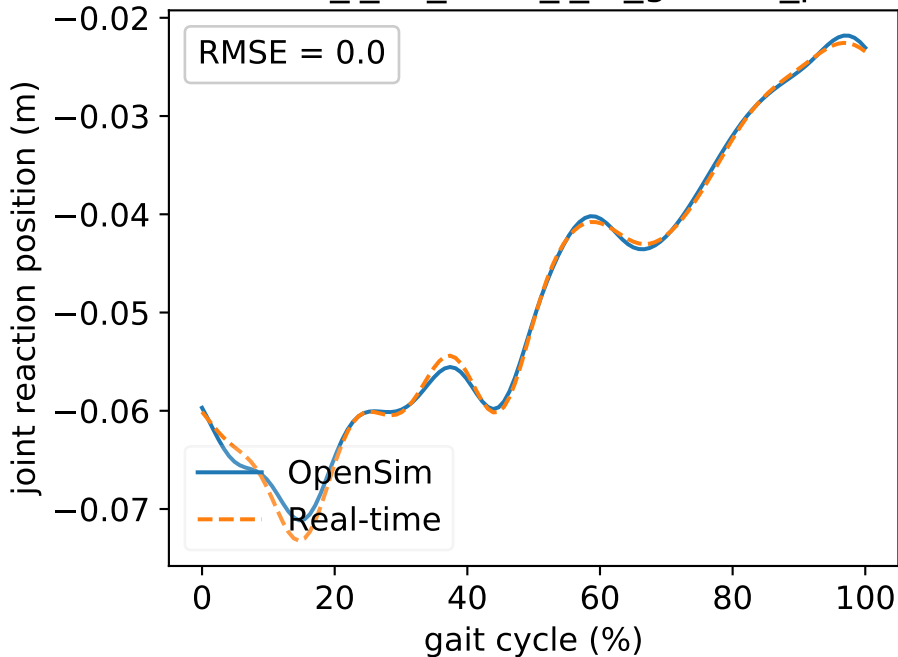

# subtalar\_l\_on\_calcn\_l\_in\_ground\_fx

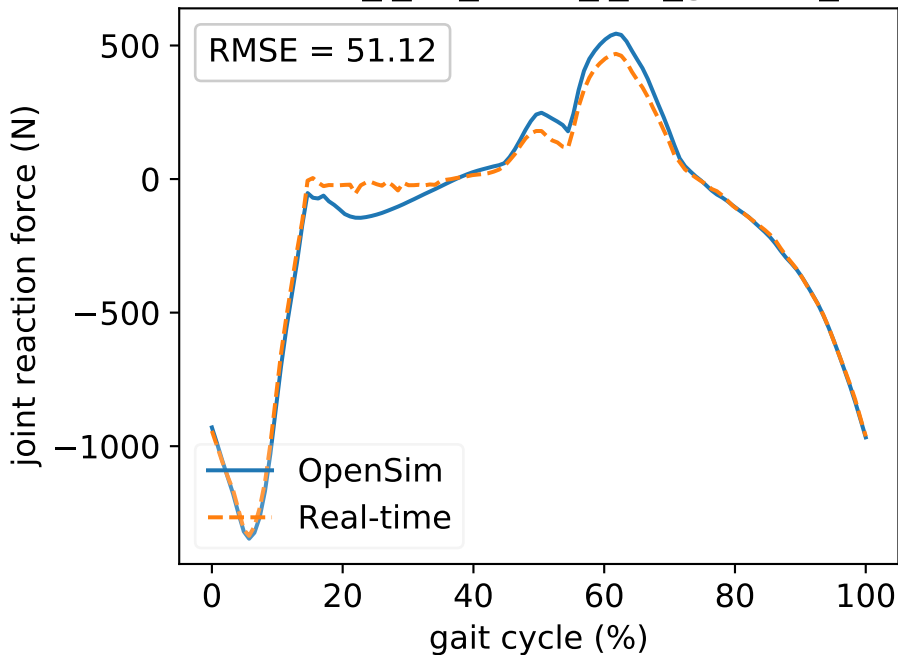

# subtalar\_l\_on\_calcn\_l\_in\_ground\_fy

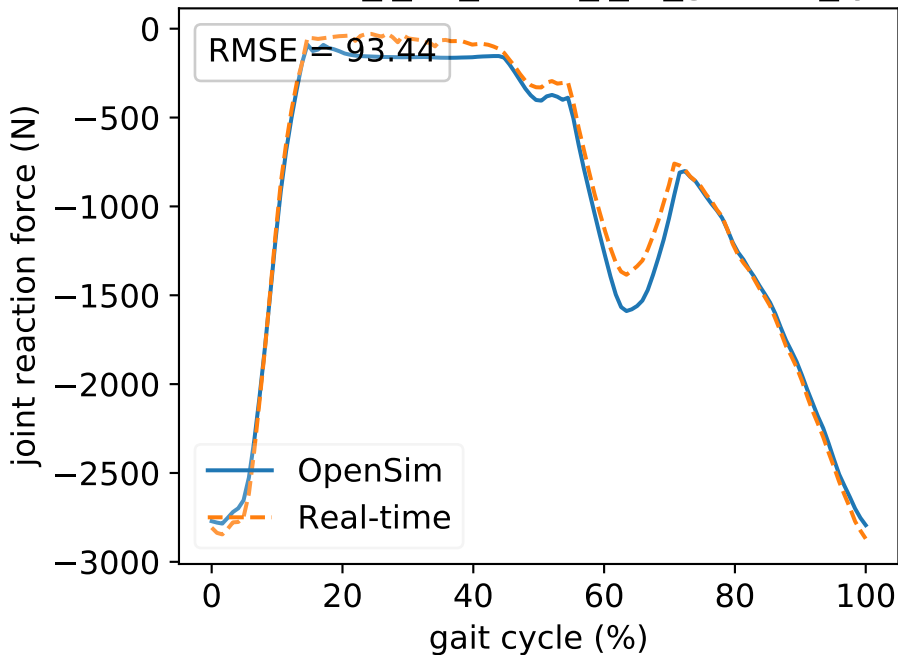

# subtalar\_l\_on\_calcn\_l\_in\_ground\_fz

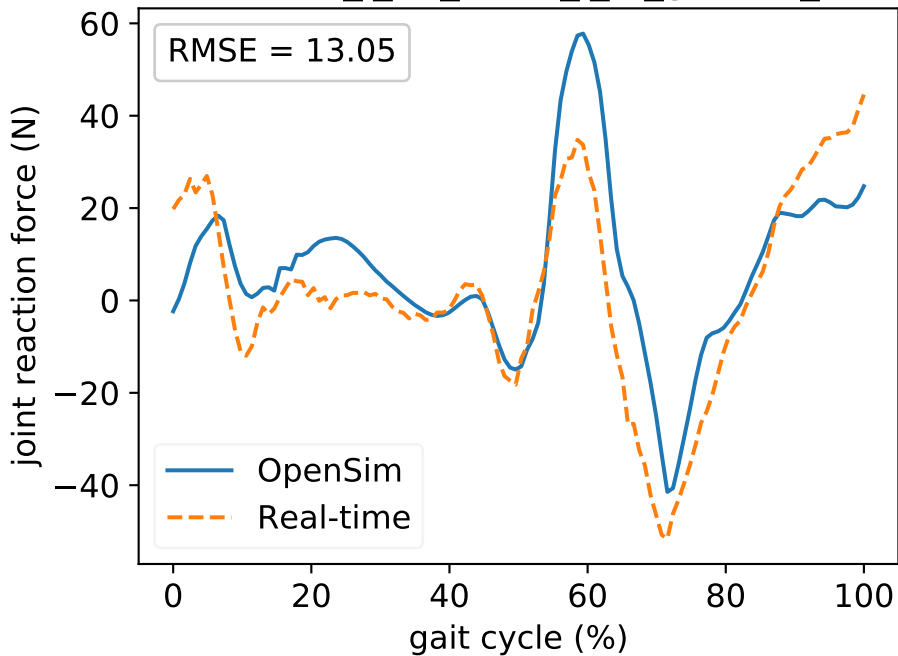

# subtalar\_l\_on\_calcn\_l\_in\_ground\_mx

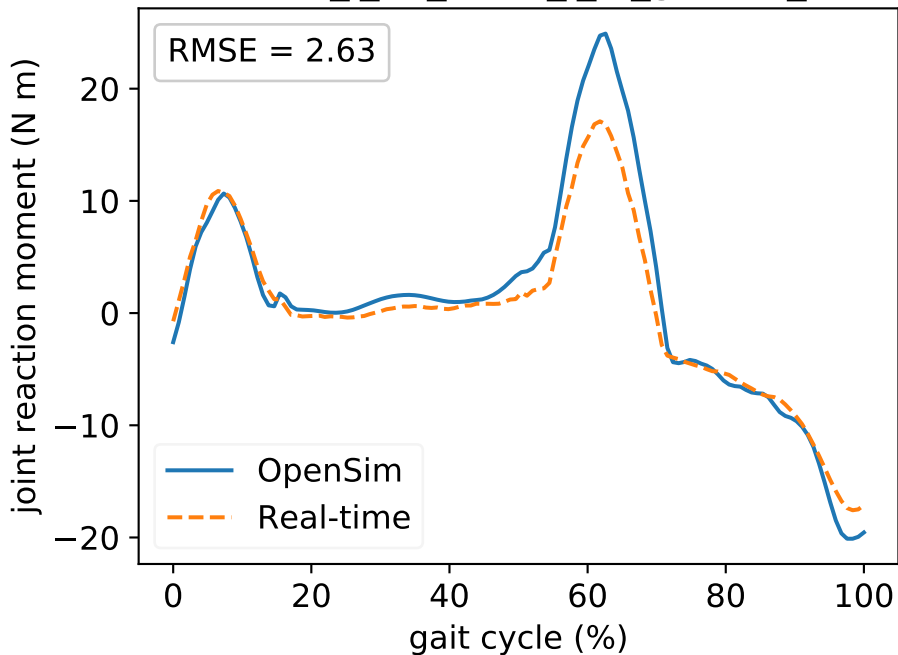

# subtalar\_l\_on\_calcn\_l\_in\_ground\_my

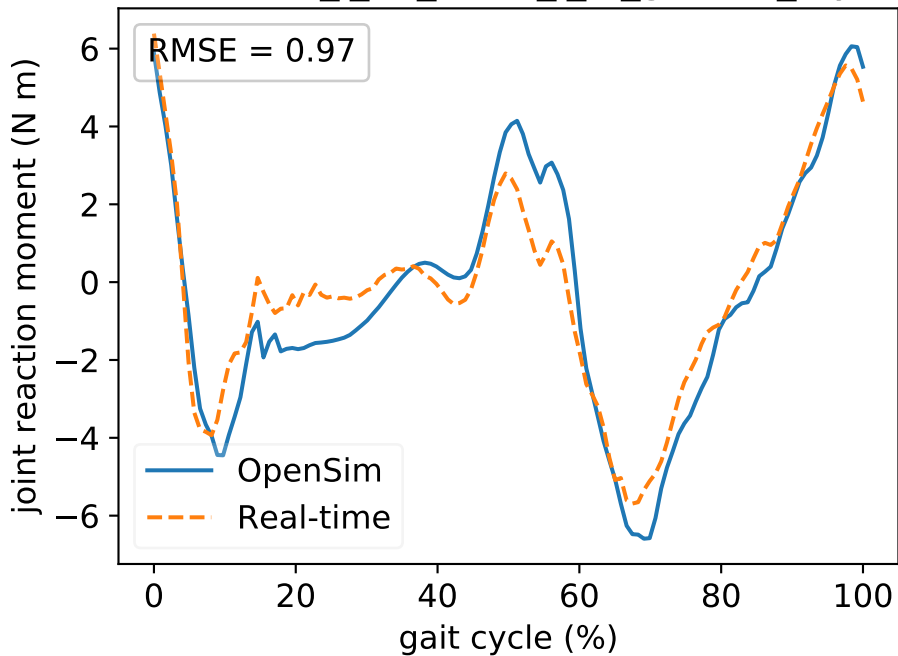

# subtalar\_l\_on\_calcn\_l\_in\_ground\_mz

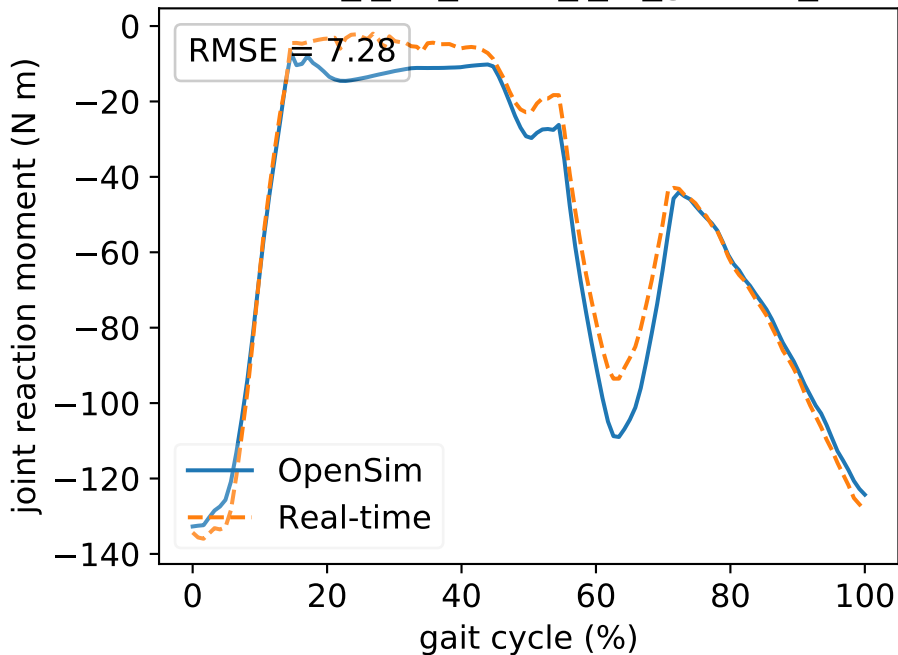

# subtalar\_l\_on\_calcn\_l\_in\_ground\_px

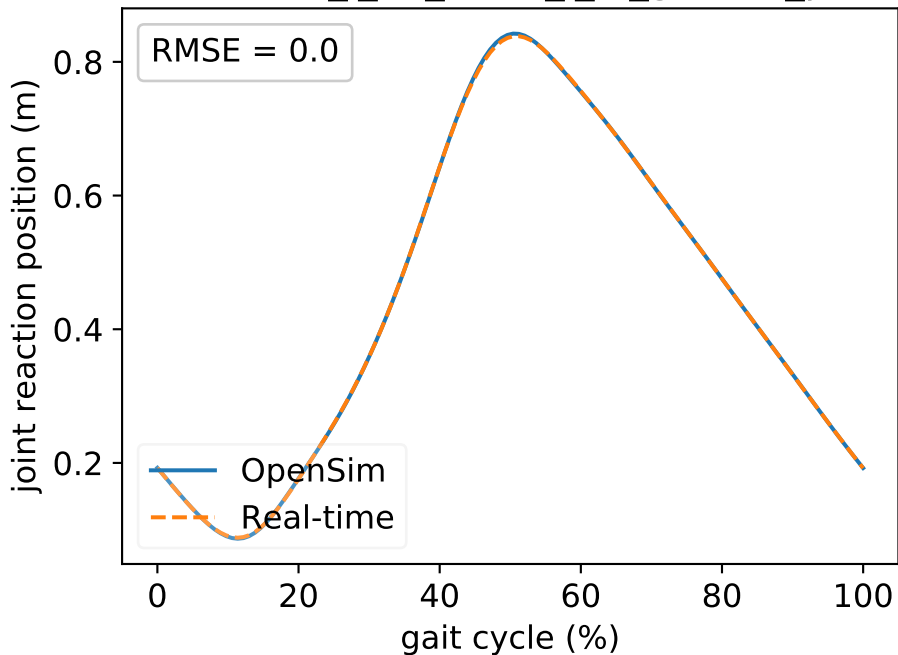



# subtalar\_l\_on\_calcn\_l\_in\_ground\_py

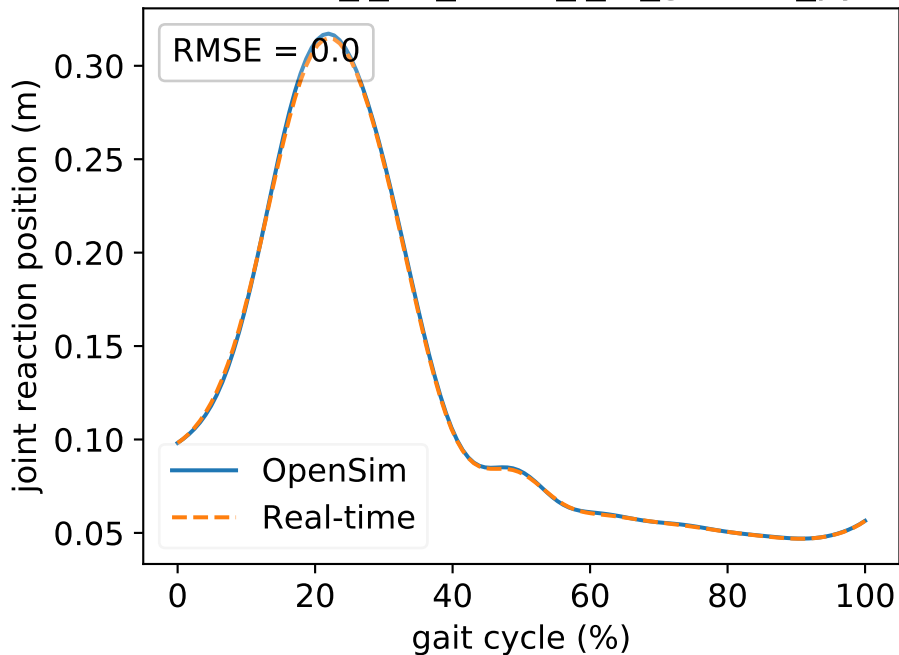

# subtalar\_l\_on\_calcn\_l\_in\_ground\_pz

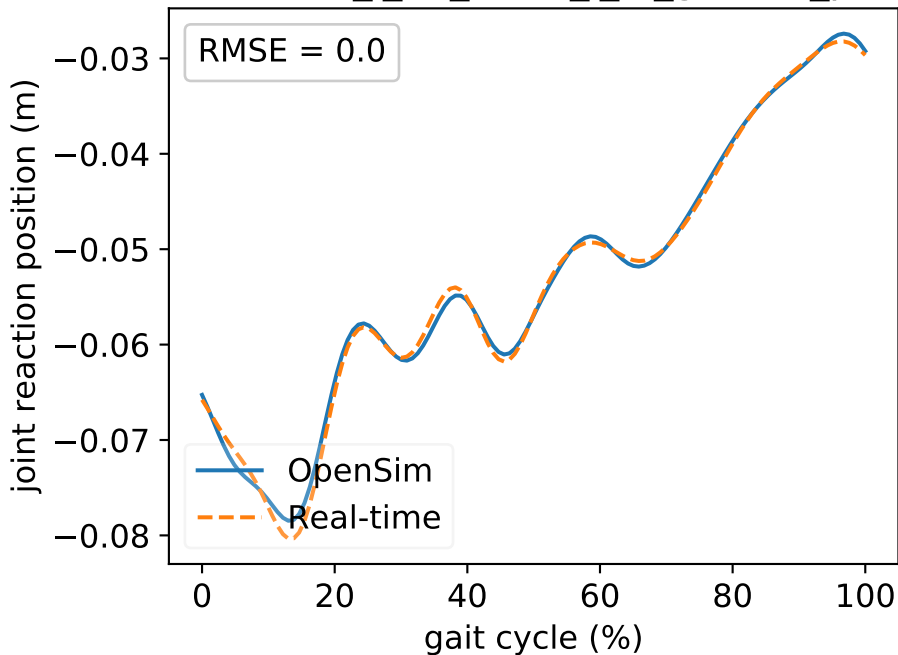

# mtp\_l\_on\_toes\_l\_in\_ground\_fx

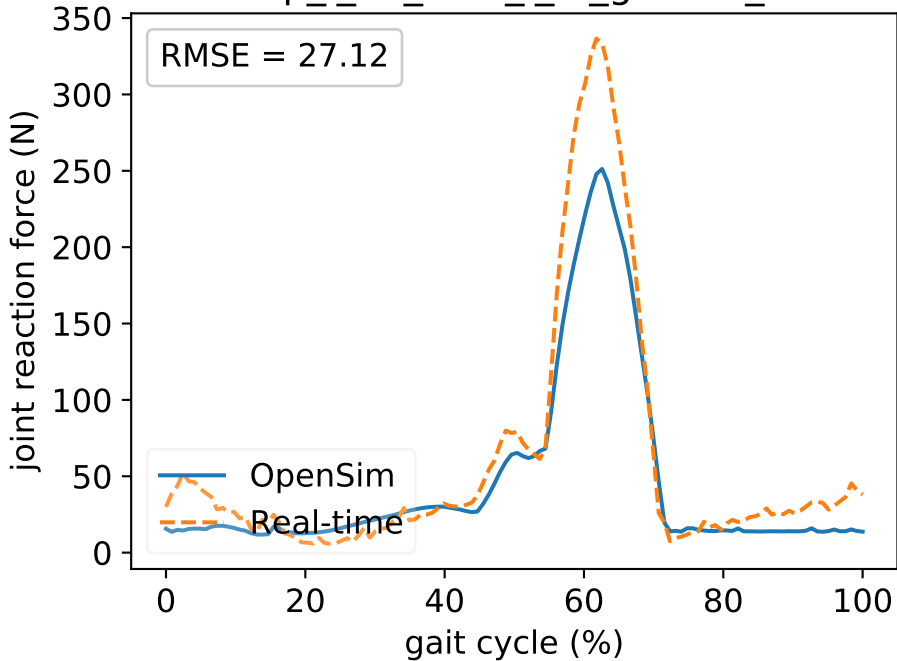

# mtp\_l\_on\_toes\_l\_in\_ground\_fy

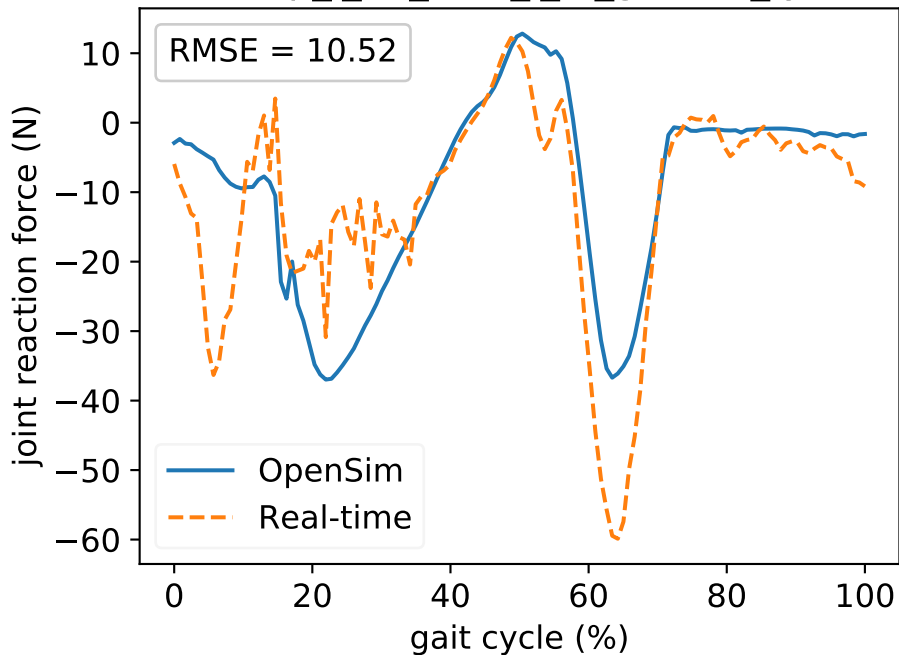

# mtp\_l\_on\_toes\_l\_in\_ground\_fz

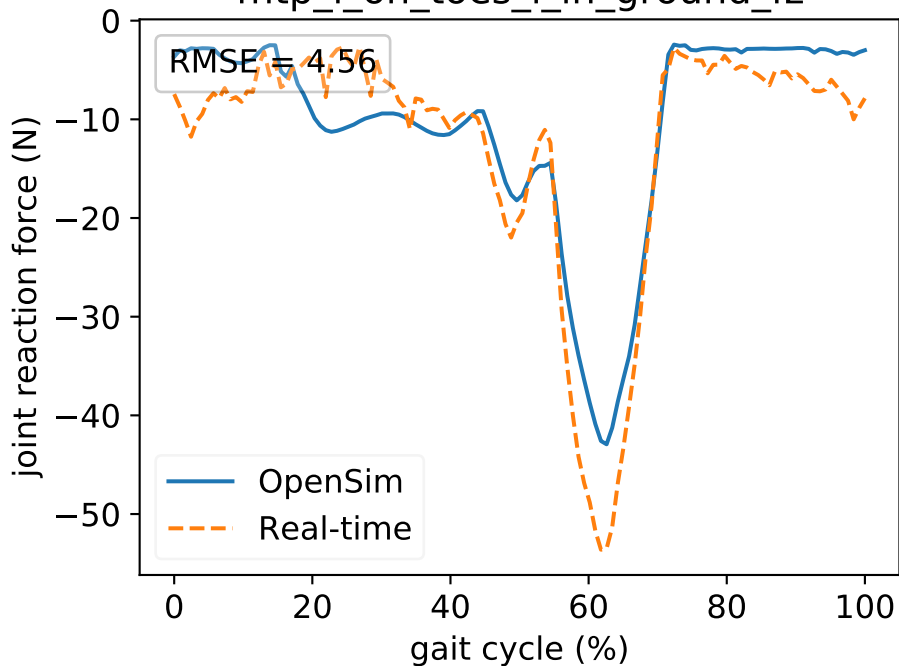

# mtp\_l\_on\_toes\_l\_in\_ground\_mx

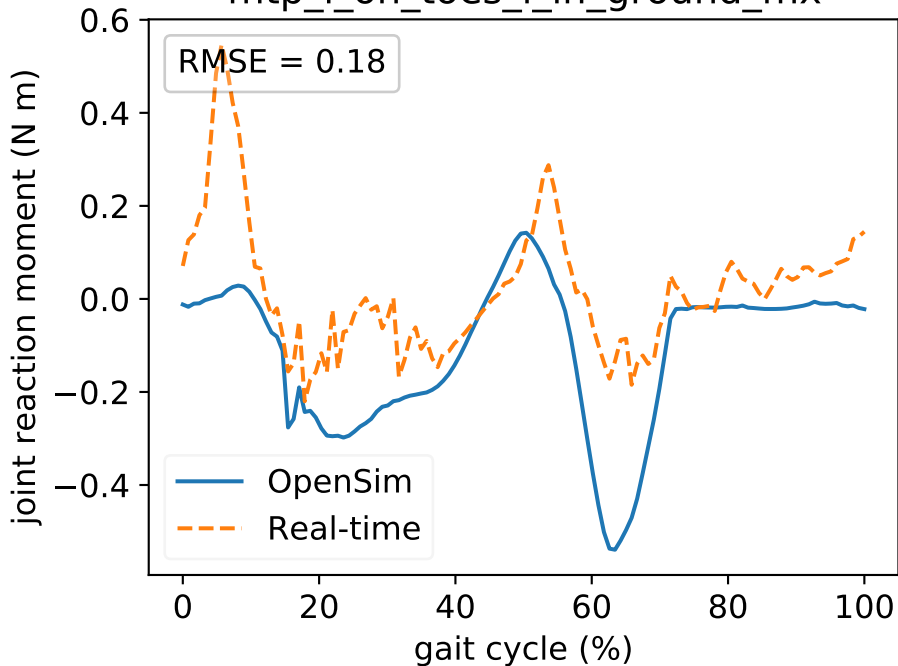

# mtp\_l\_on\_toes\_l\_in\_ground\_my

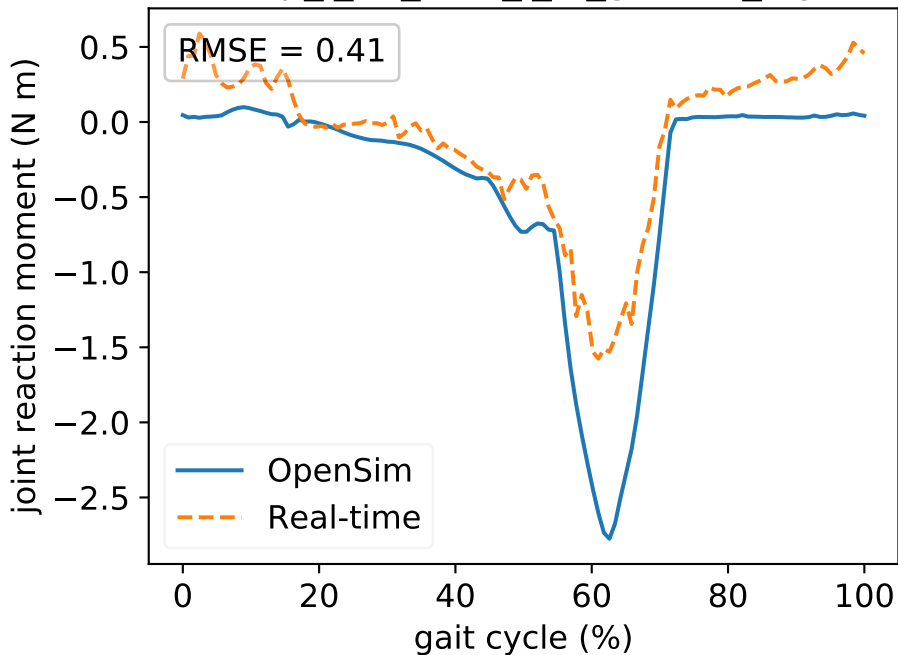

# mtp\_l\_on\_toes\_l\_in\_ground\_mz

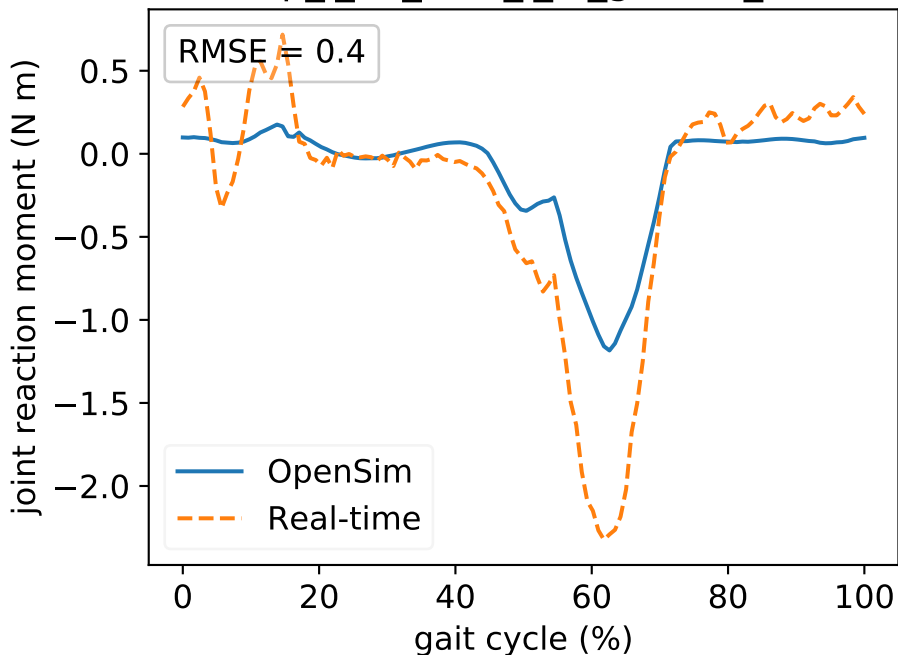



# mtp\_l\_on\_toes\_l\_in\_ground\_px

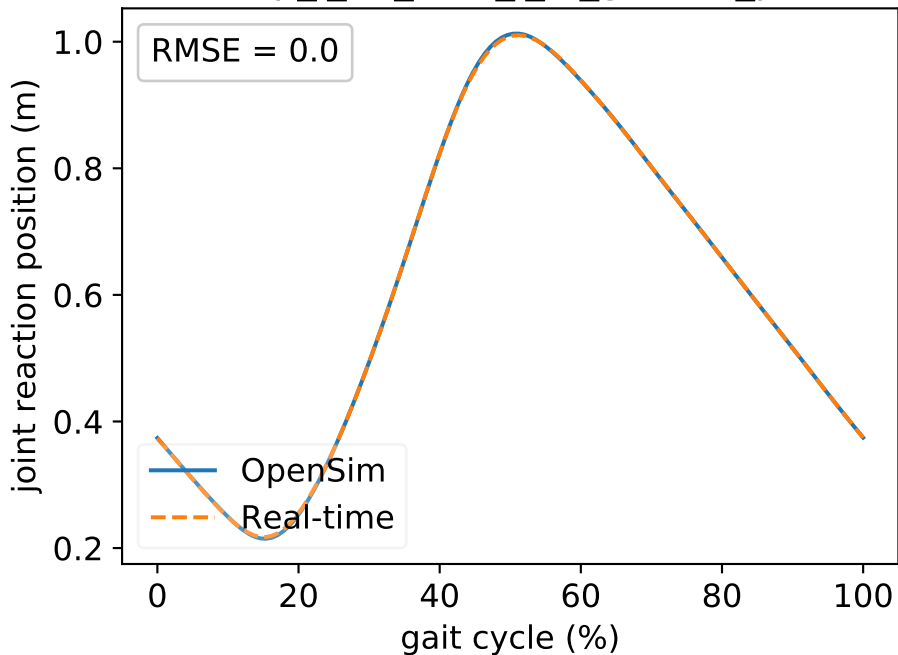

# mtp\_l\_on\_toes\_l\_in\_ground\_py

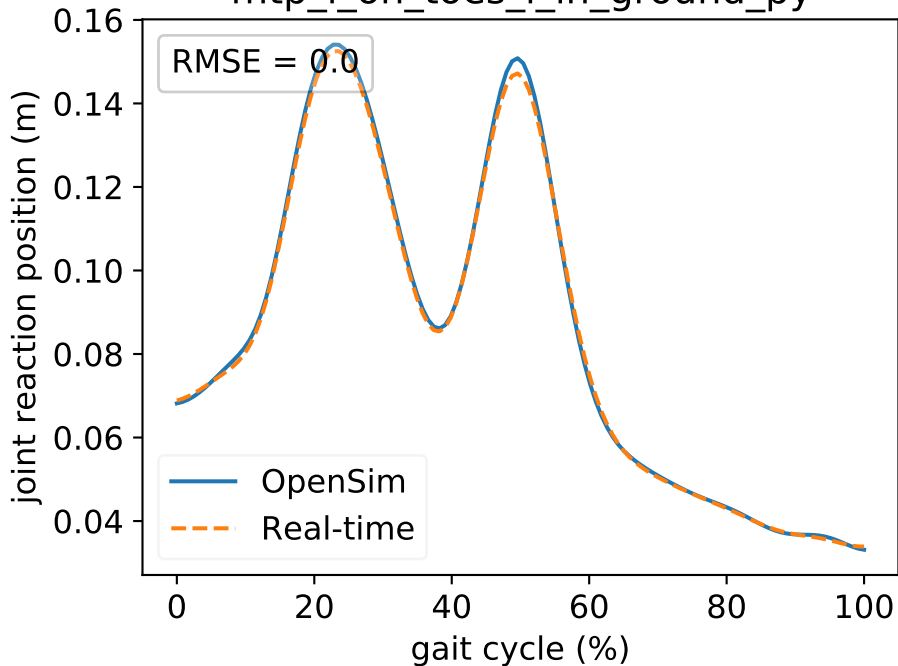

# mtp\_l\_on\_toes\_l\_in\_ground\_pz

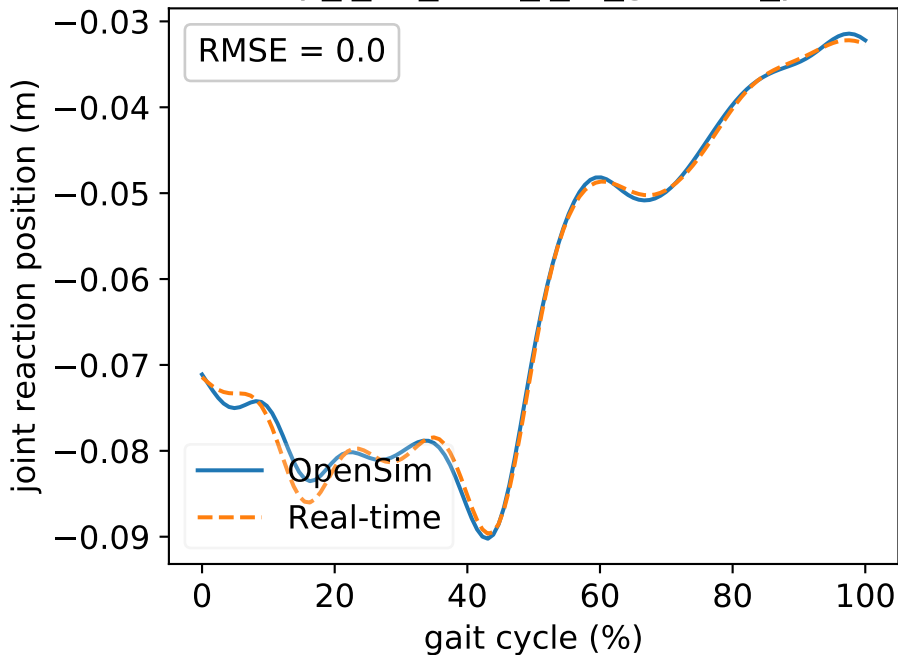

# back\_on\_torso\_in\_ground\_fx

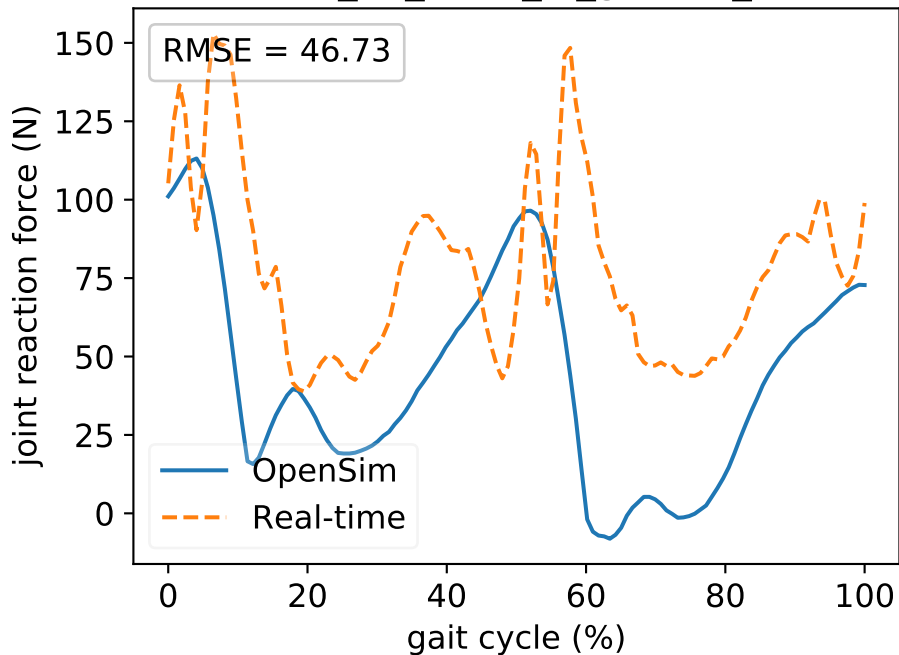

# back\_on\_torso\_in\_ground\_fy

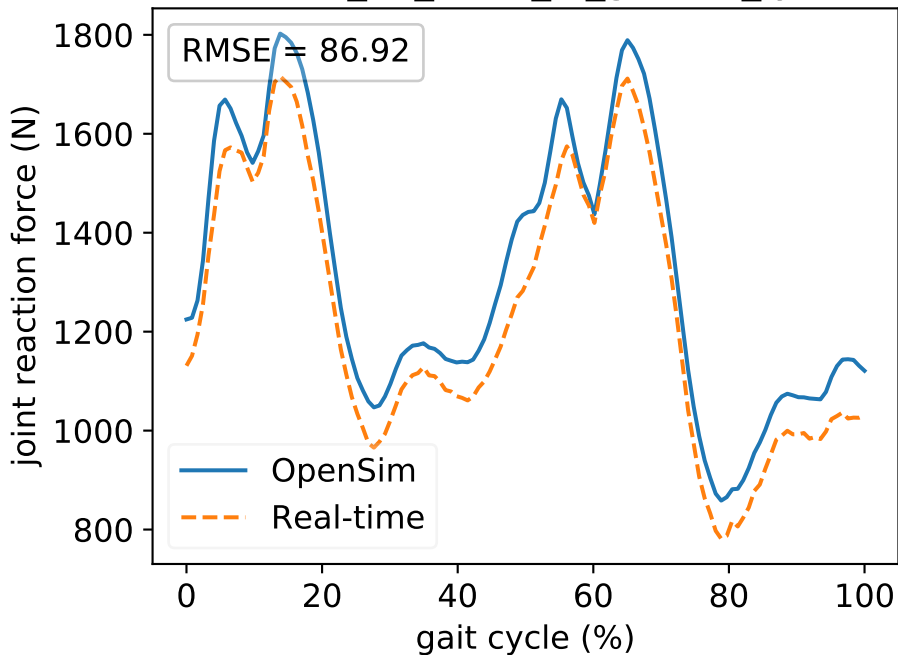

# back\_on\_torso\_in\_ground\_fz

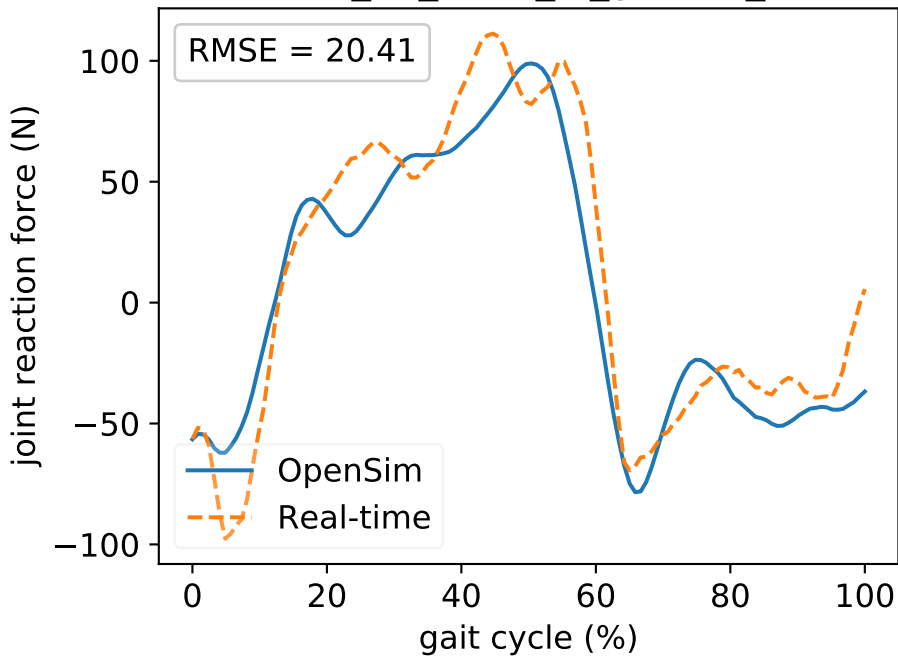

# back\_on\_torso\_in\_ground\_mx

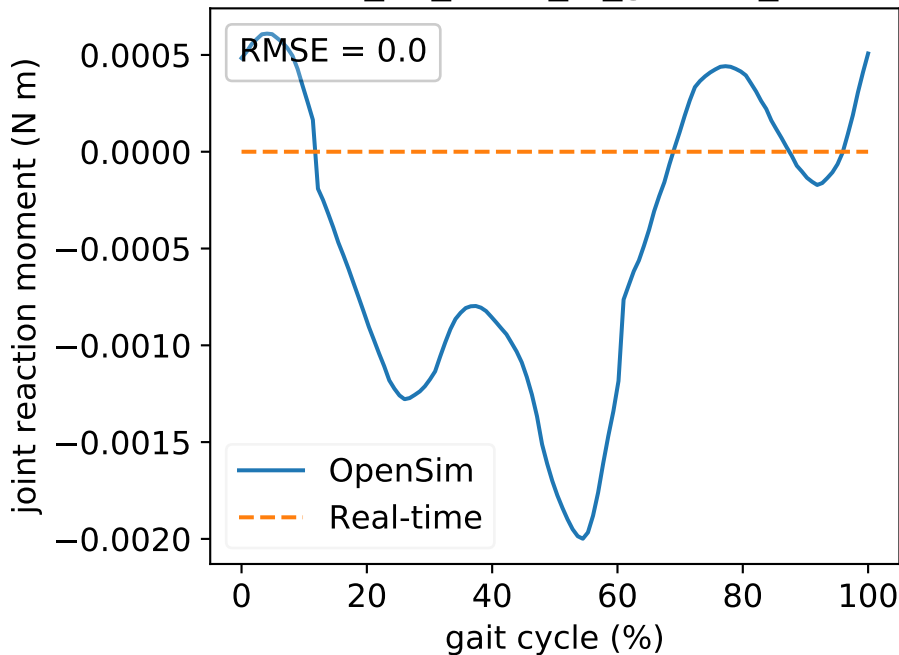

# back\_on\_torso\_in\_ground\_my

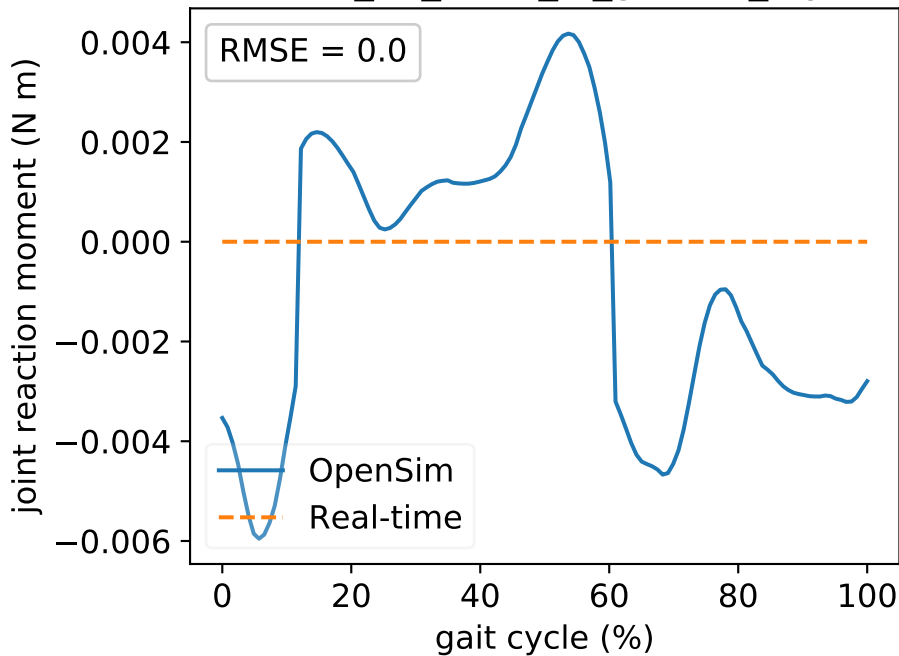



# back\_on\_torso\_in\_ground\_mz

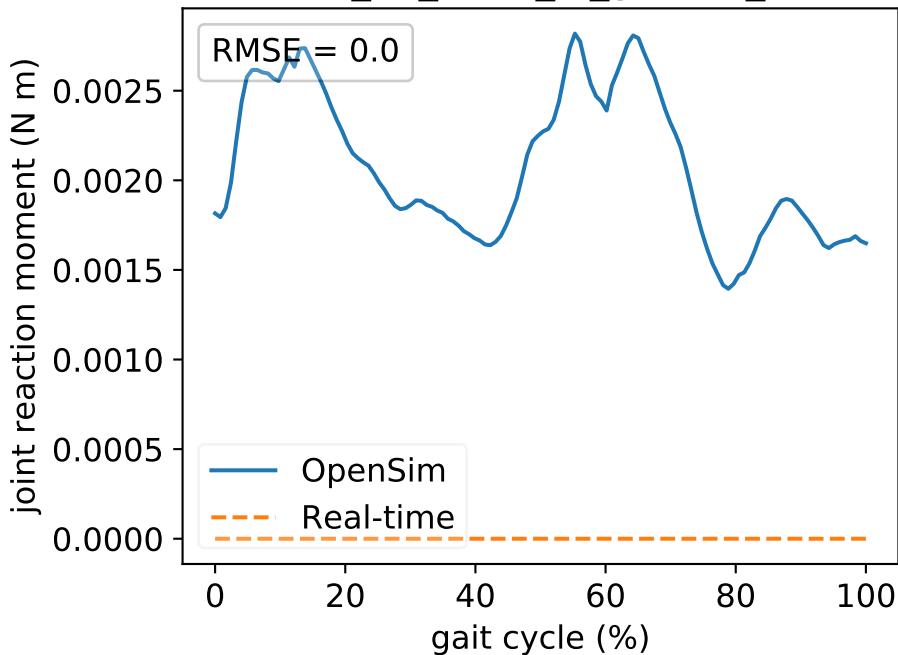

# back\_on\_torso\_in\_ground\_px

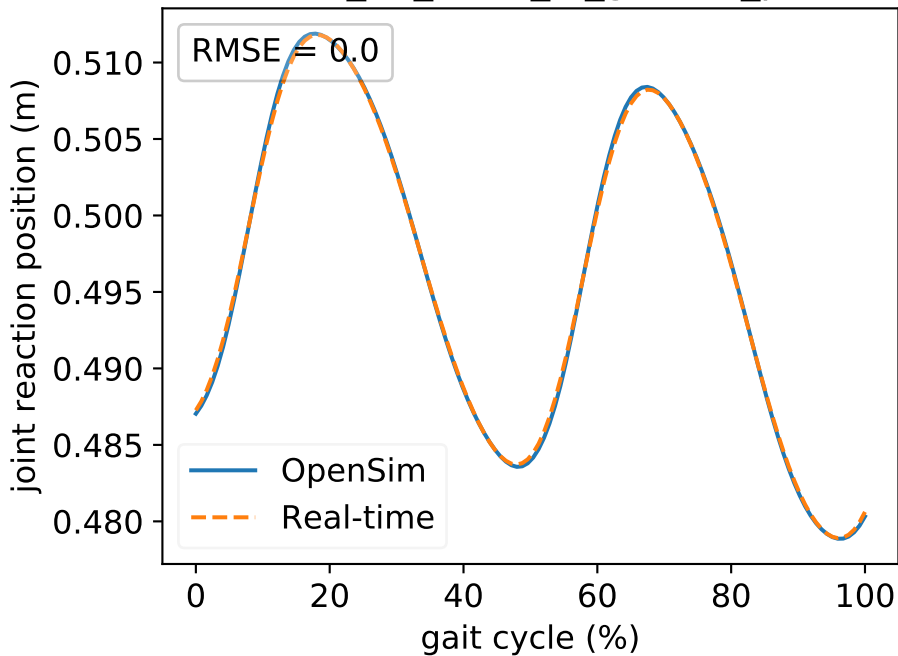

# back\_on\_torso\_in\_ground\_py

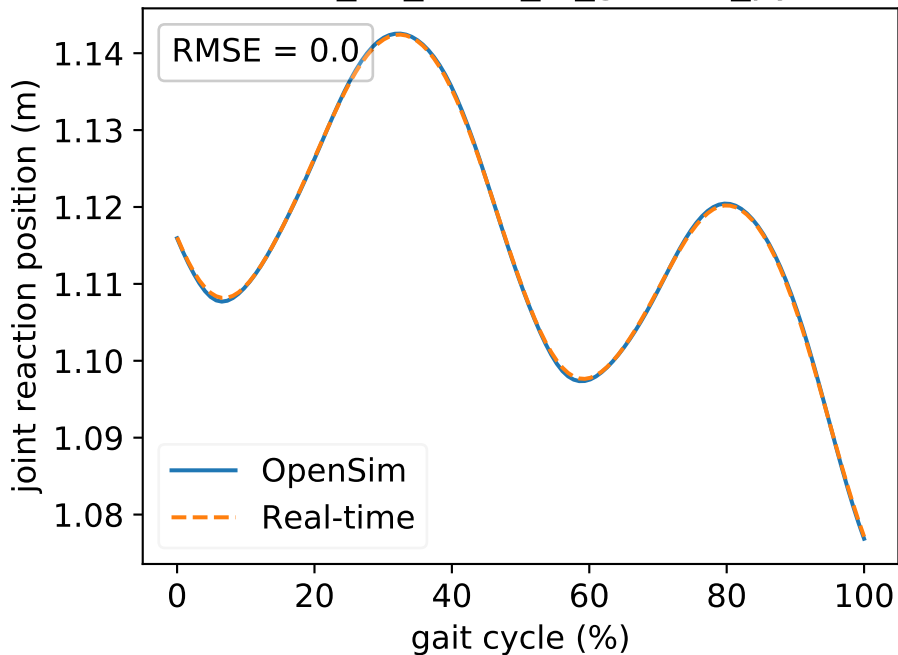

# back\_on\_torso\_in\_ground\_pz

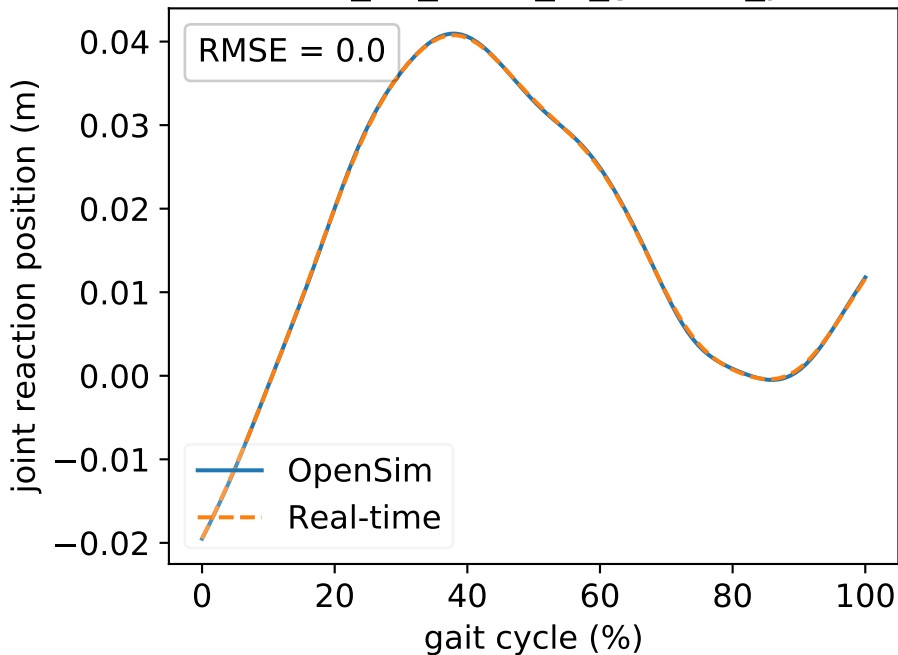

Supplement: Supplementary file 4 [file supplementary]
