# Supplementary material for: Real-Time Musculoskeletal Kinematics and Dynamics Analysis Using Marker- and IMU-based Solutions in Rehabilitation
Source: Preprints.org preprint supplement (doi:10.20944/preprints202102.0202.v2), 2021-02-26

# glut\_med1\_r

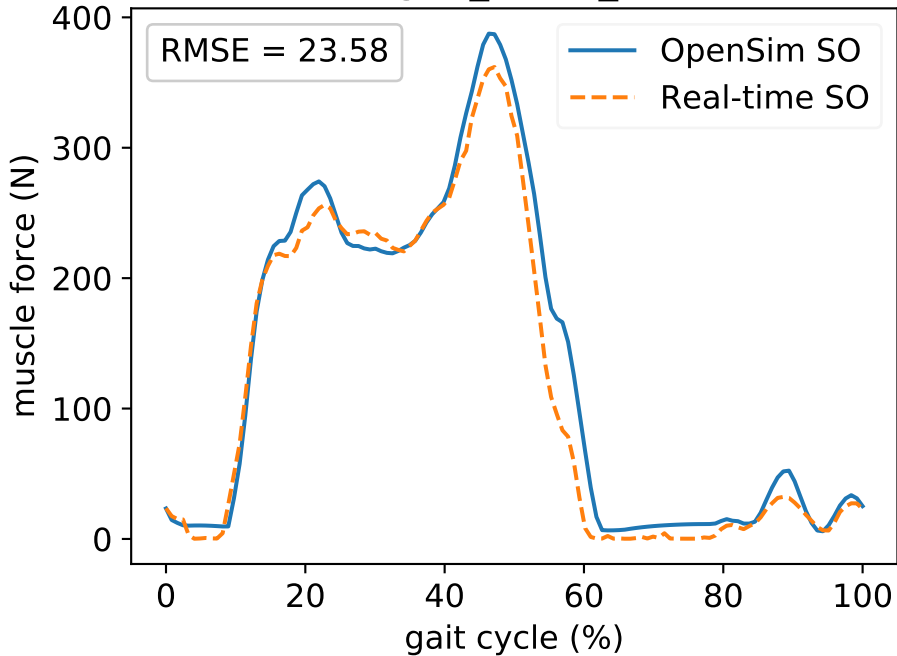

## glut\_med2\_r

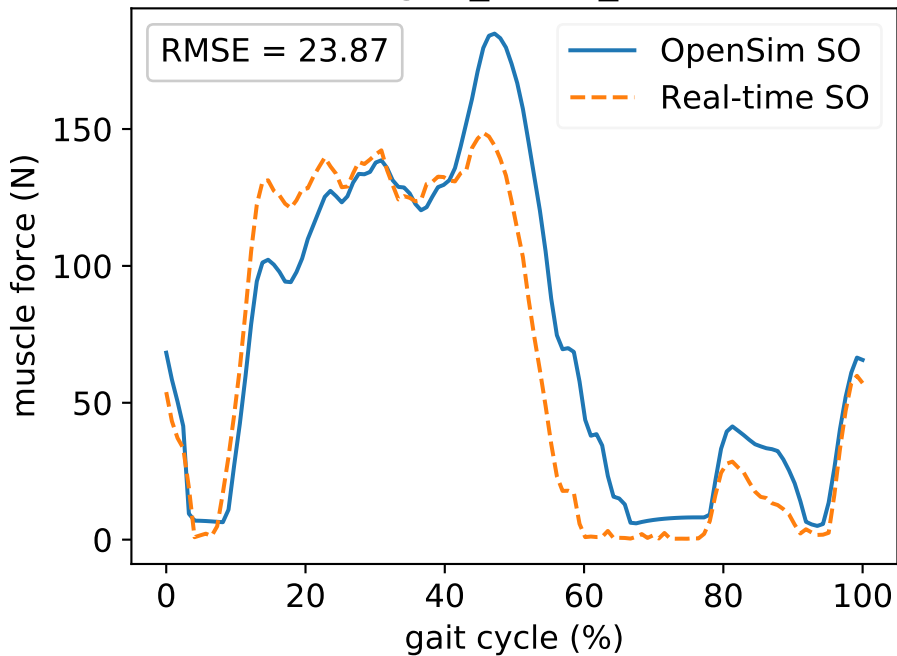

# glut\_med3\_r

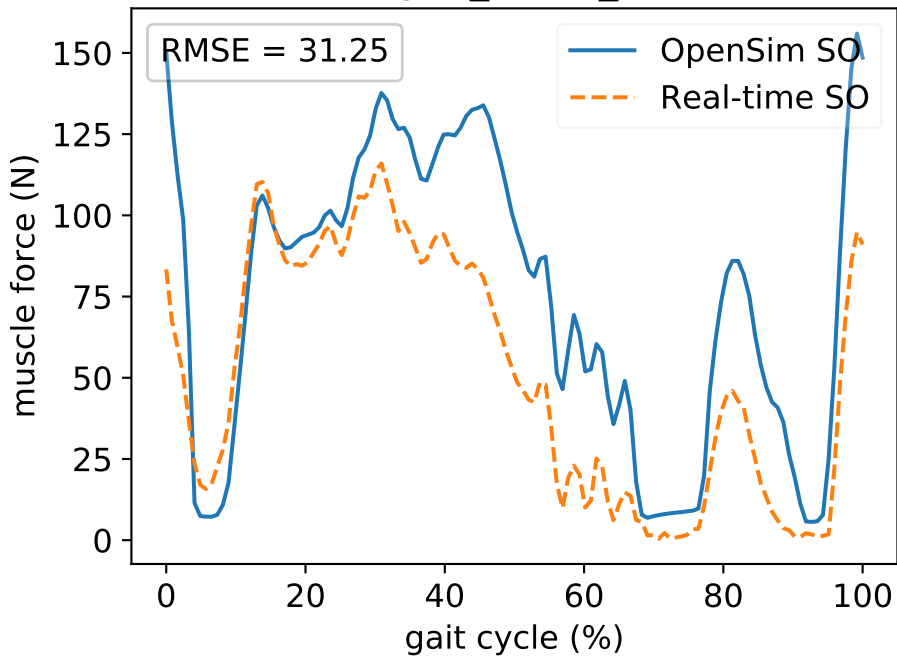

# glut\_min1\_r

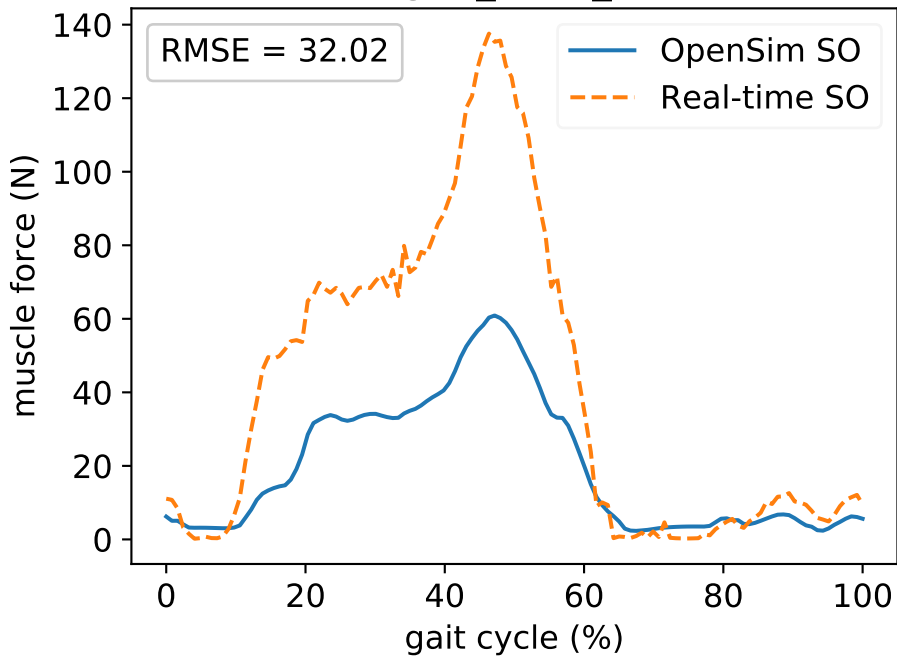

## glut\_min2\_r

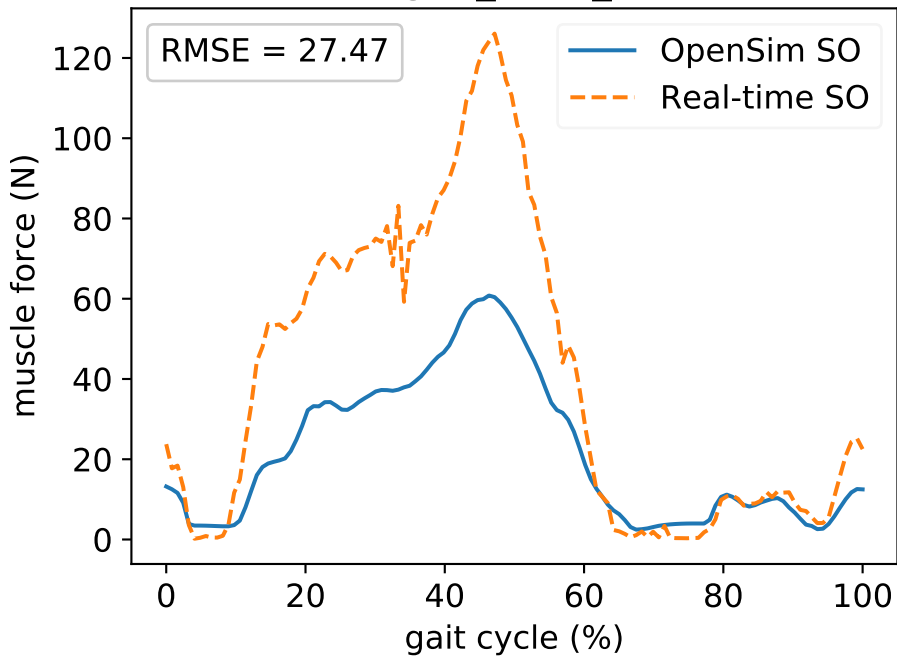

# glut\_min3\_r

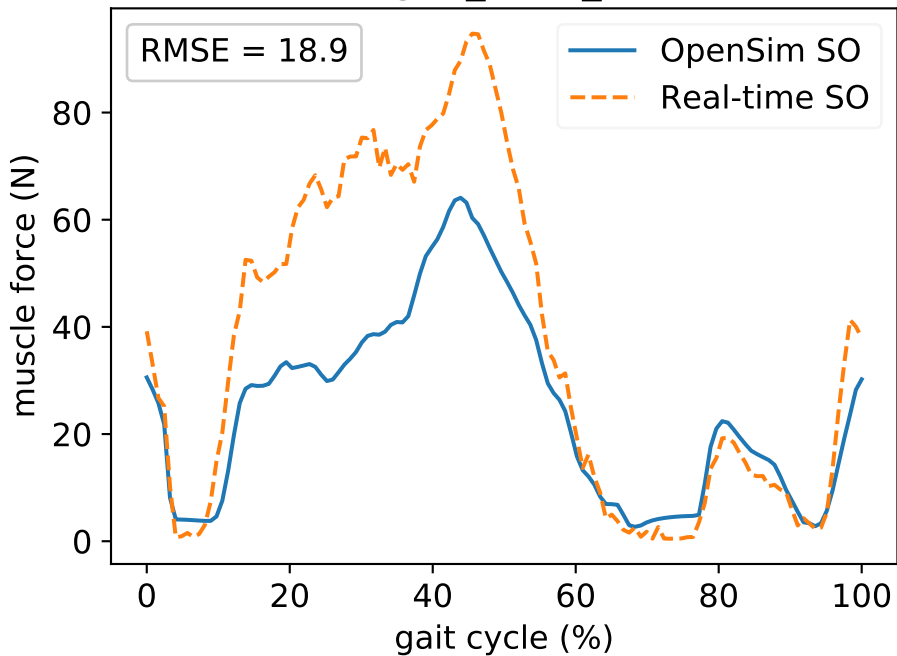

## semimem\_r

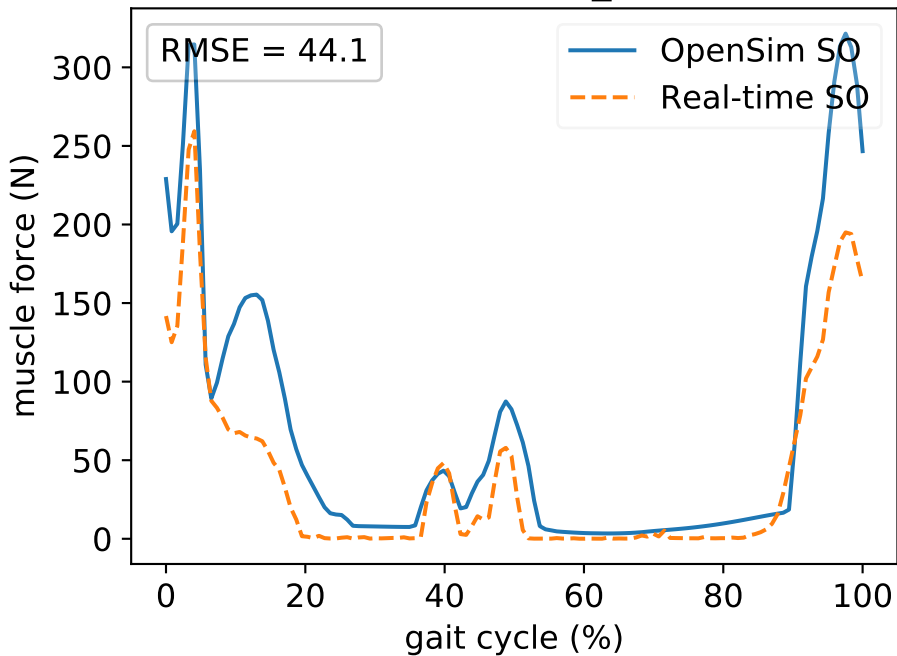

# semiten\_r

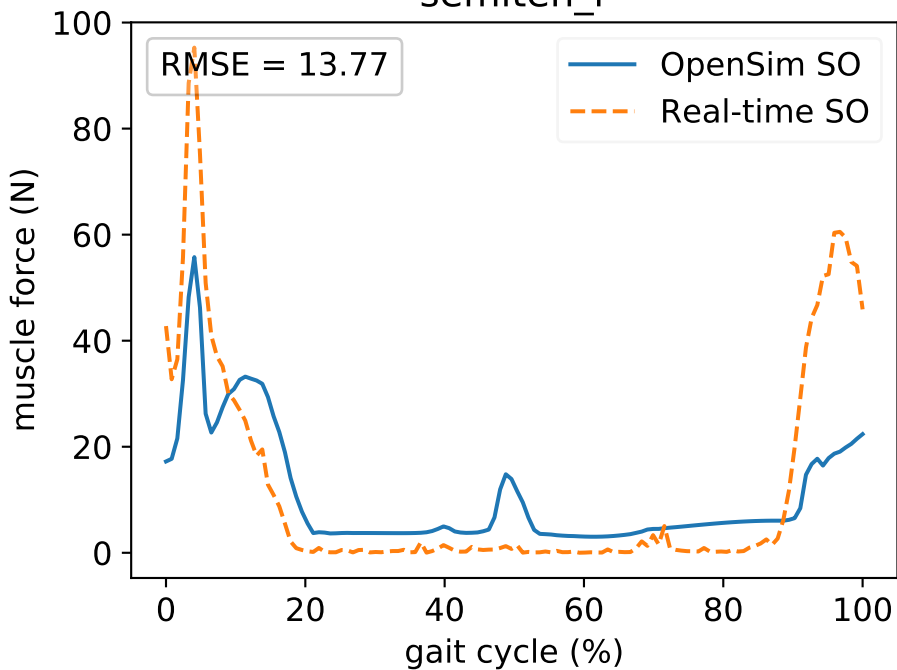



# bifemlh\_r

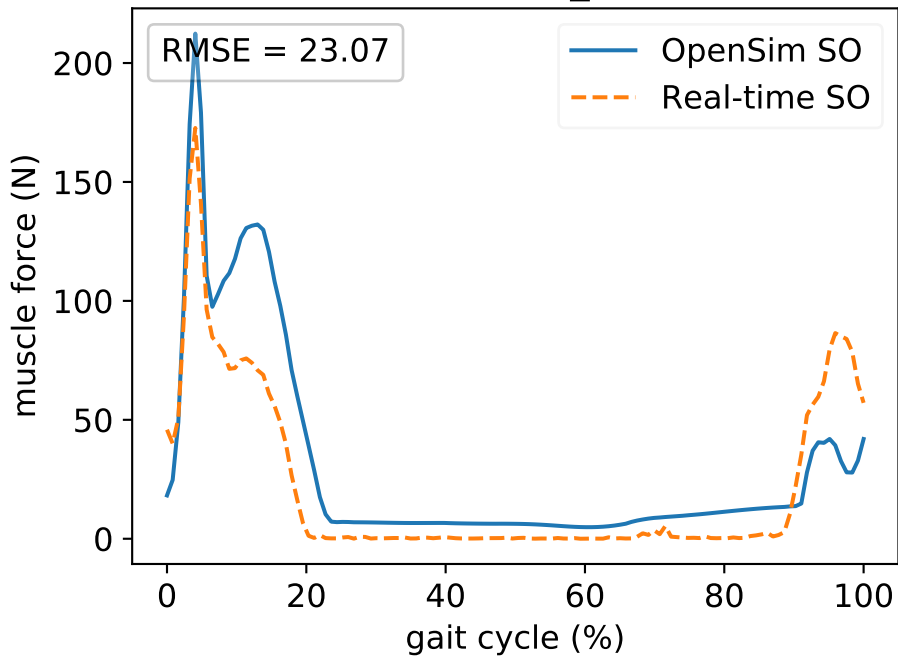

## bifemsh\_r

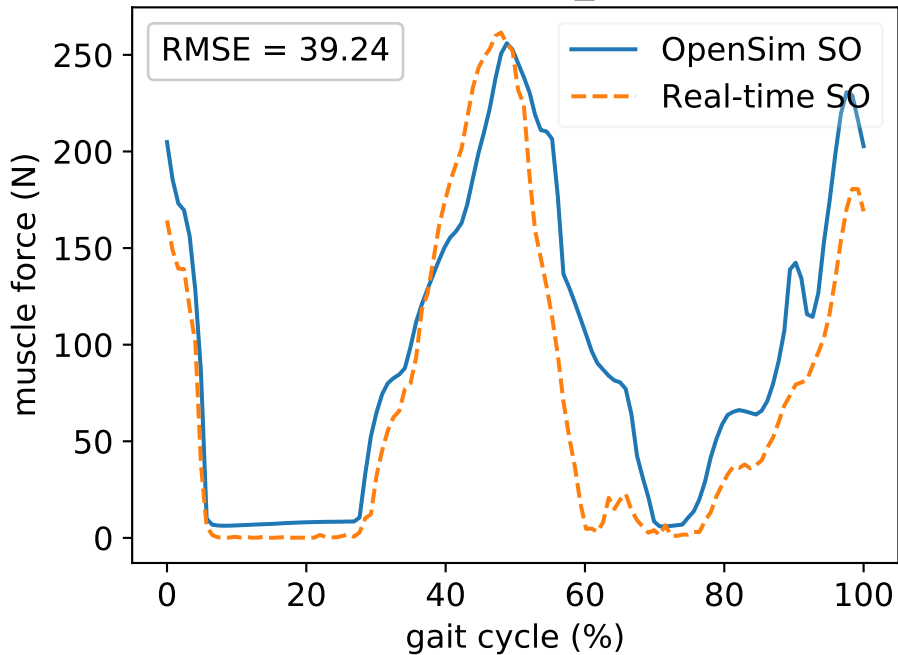

sar\_r

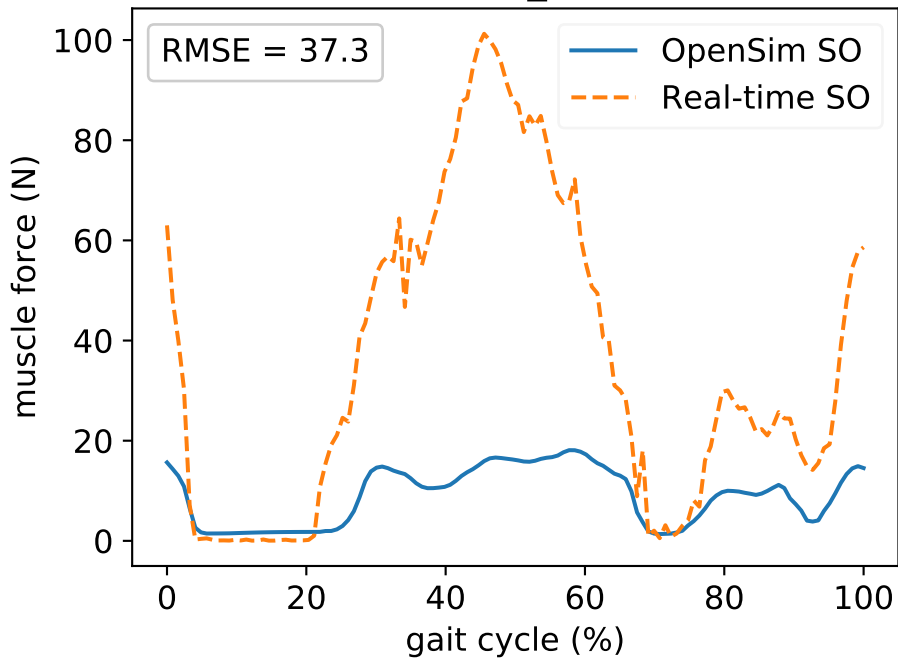

## add\_long\_r

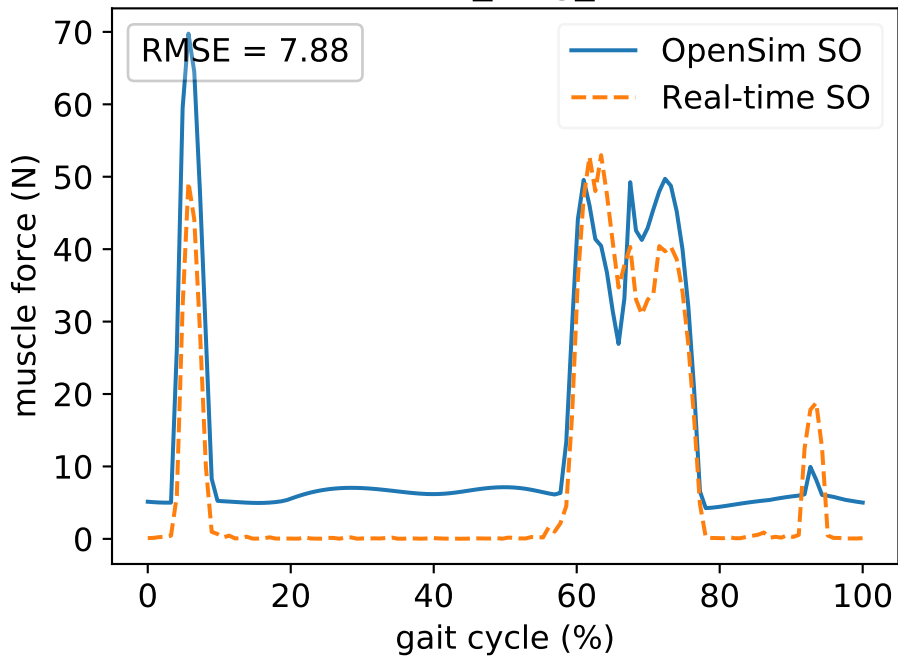

## add\_brev\_r

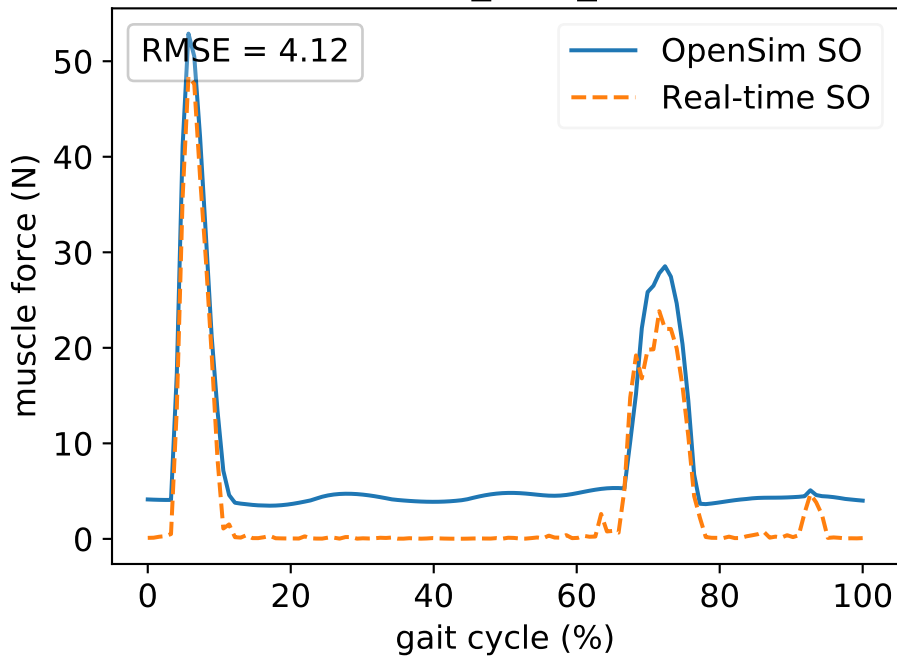

## add\_mag1\_r

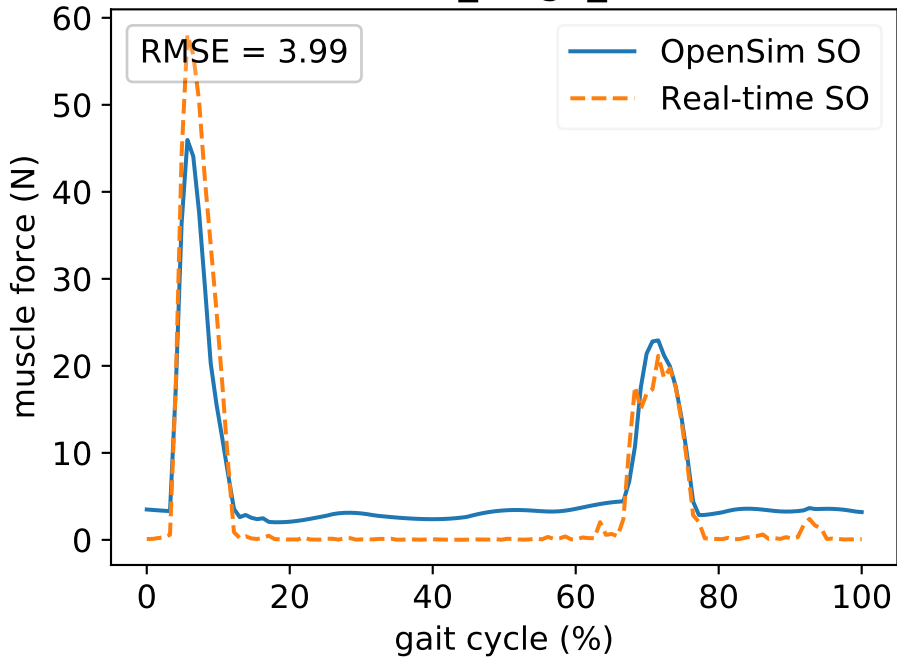

## add\_mag2\_r

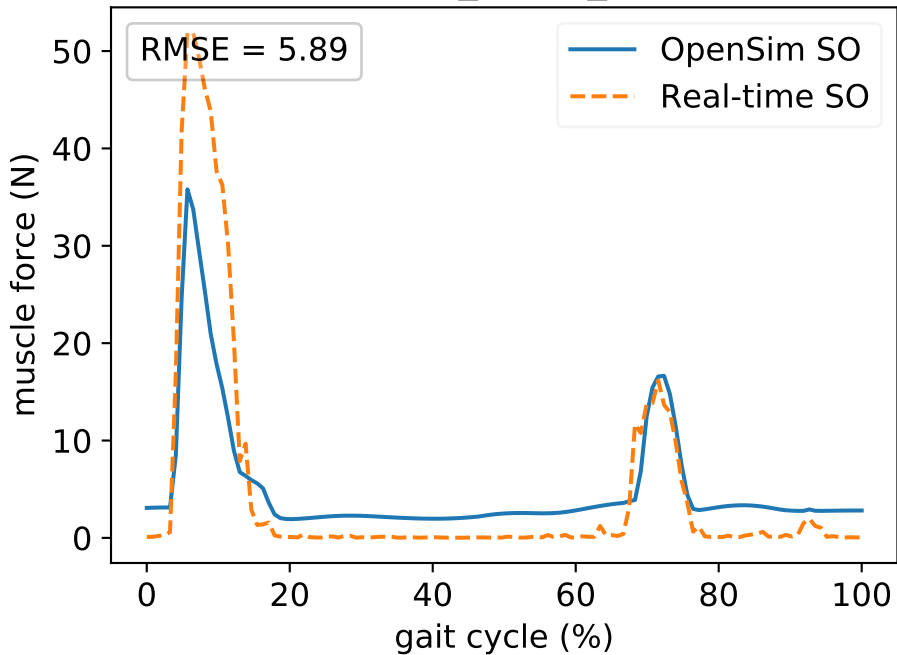

# add\_mag3\_r

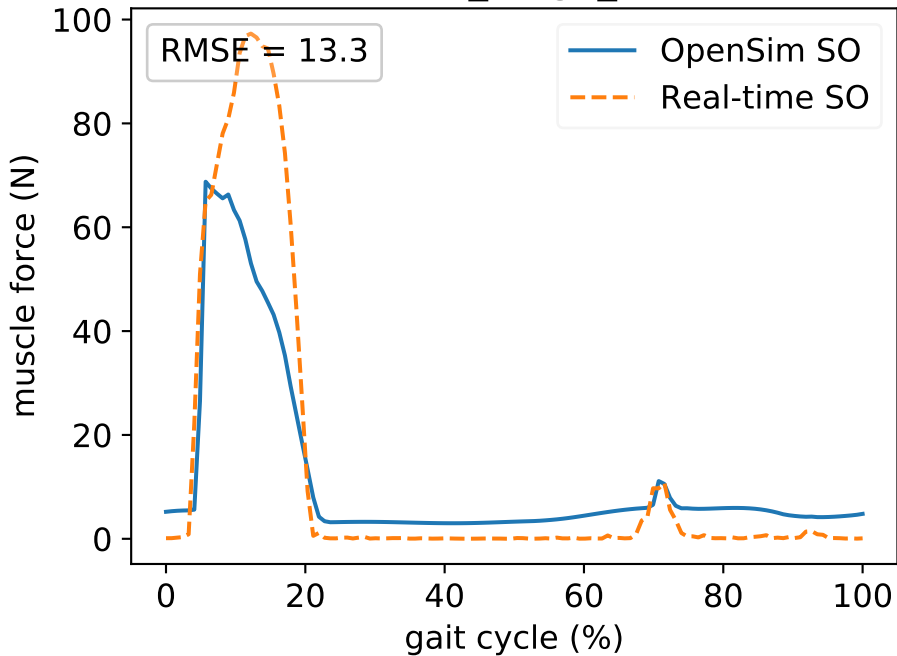



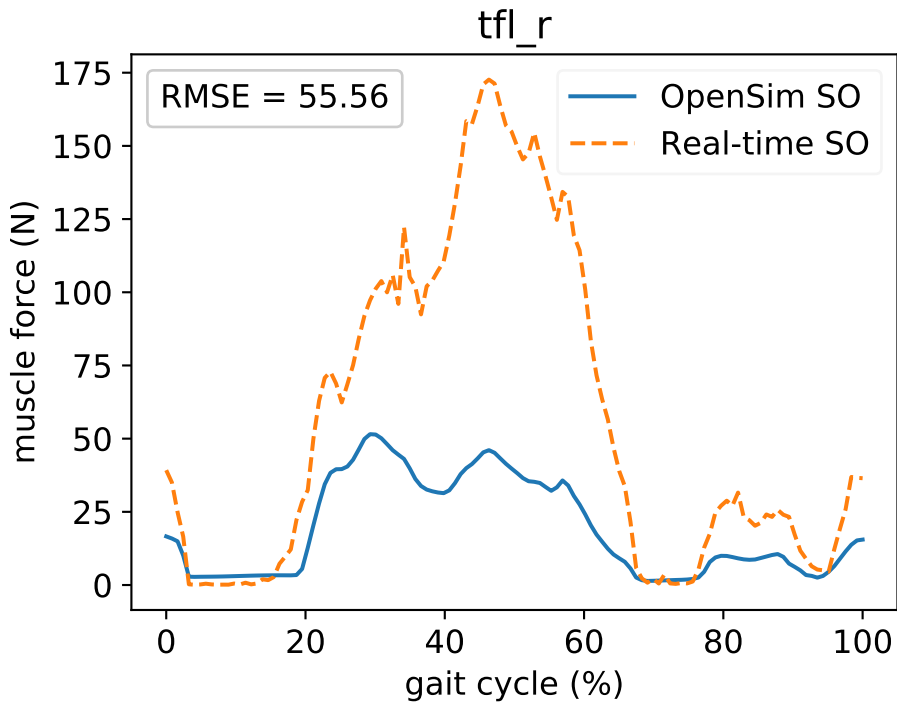

pect\_r

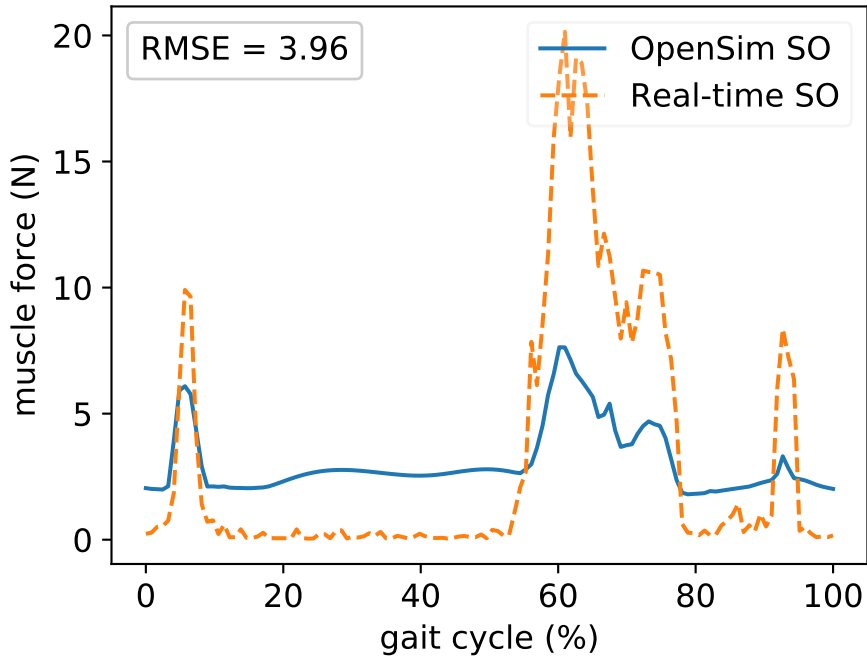

# grac\_r

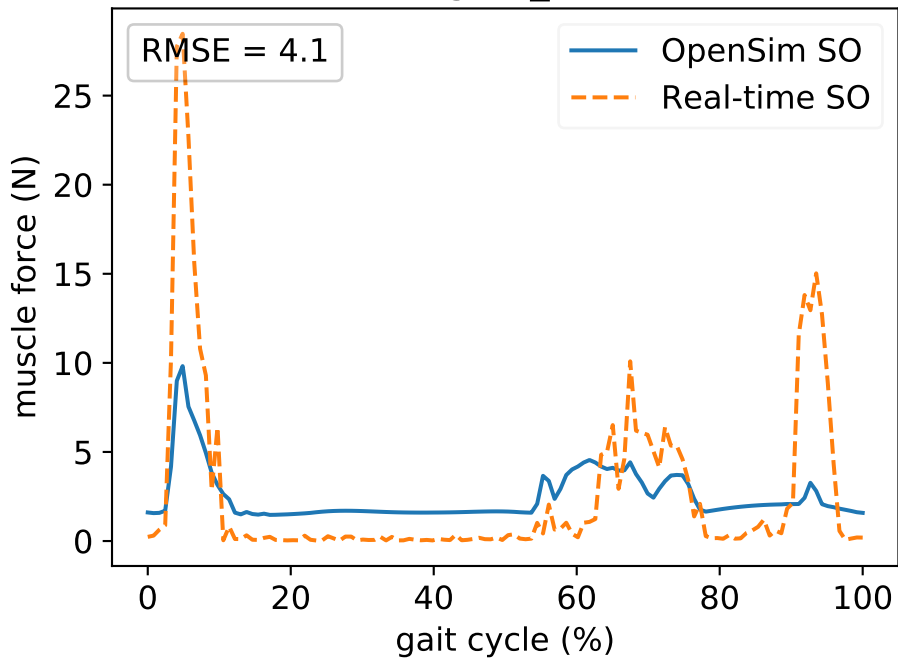

# glut\_max1\_r

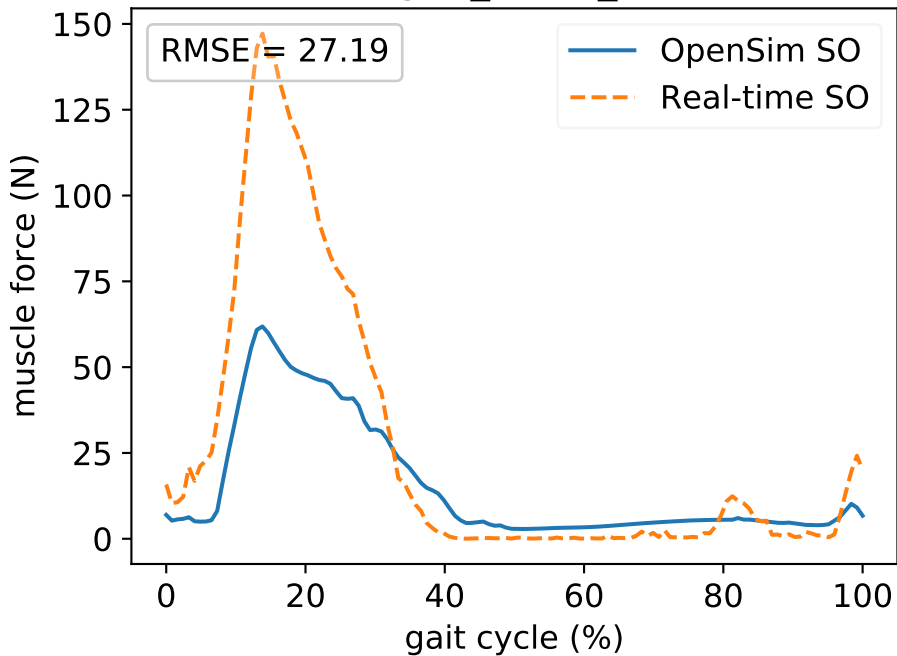

## glut\_max2\_r

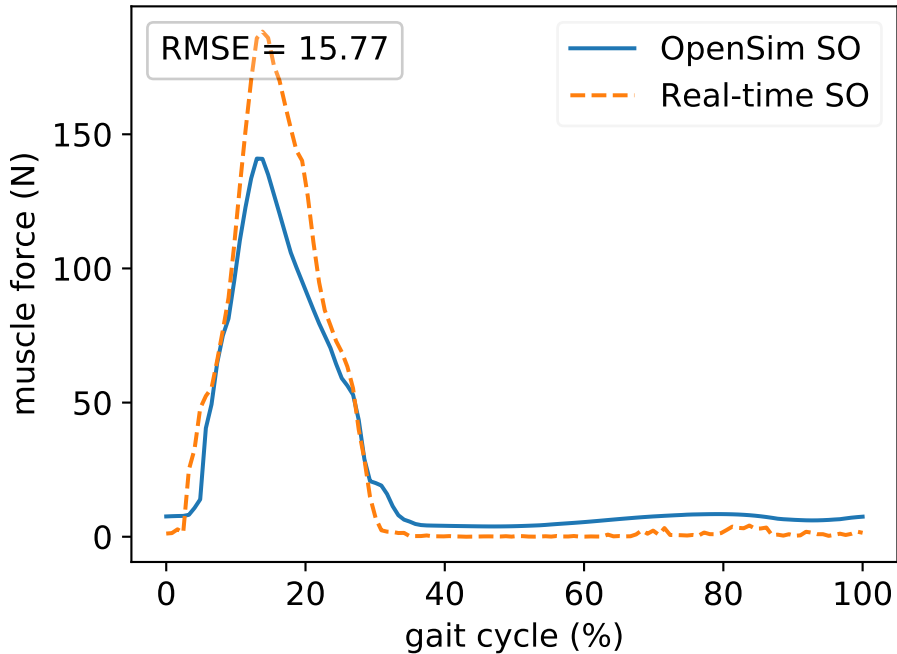

# glut\_max3\_r

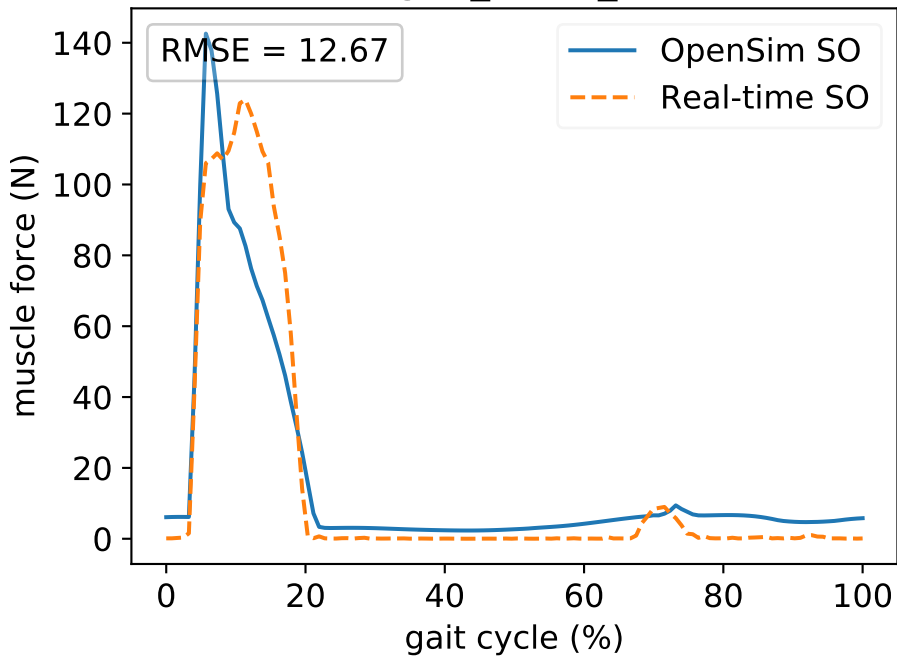

## iliacus\_r

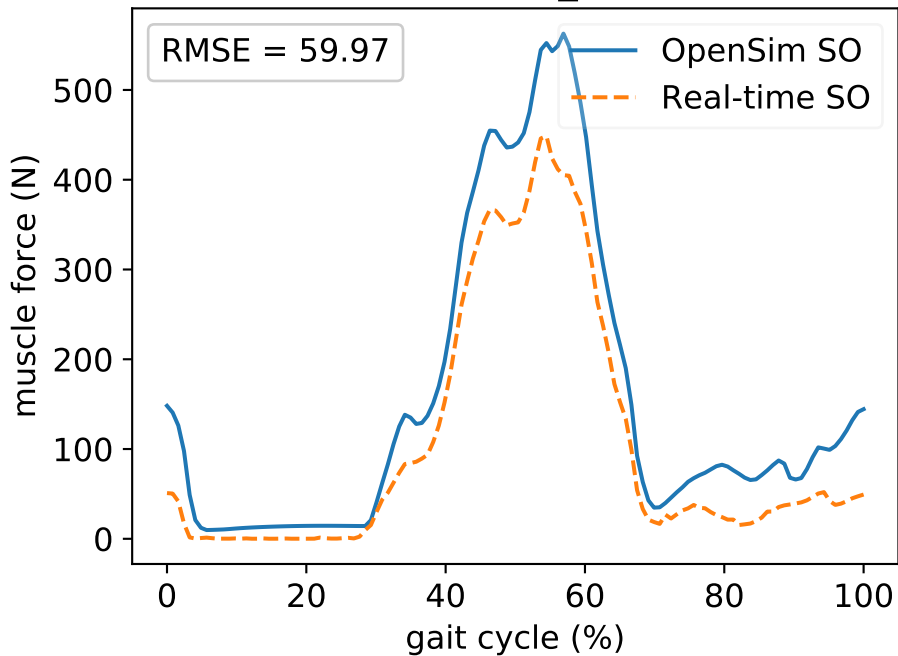

# psoas\_r

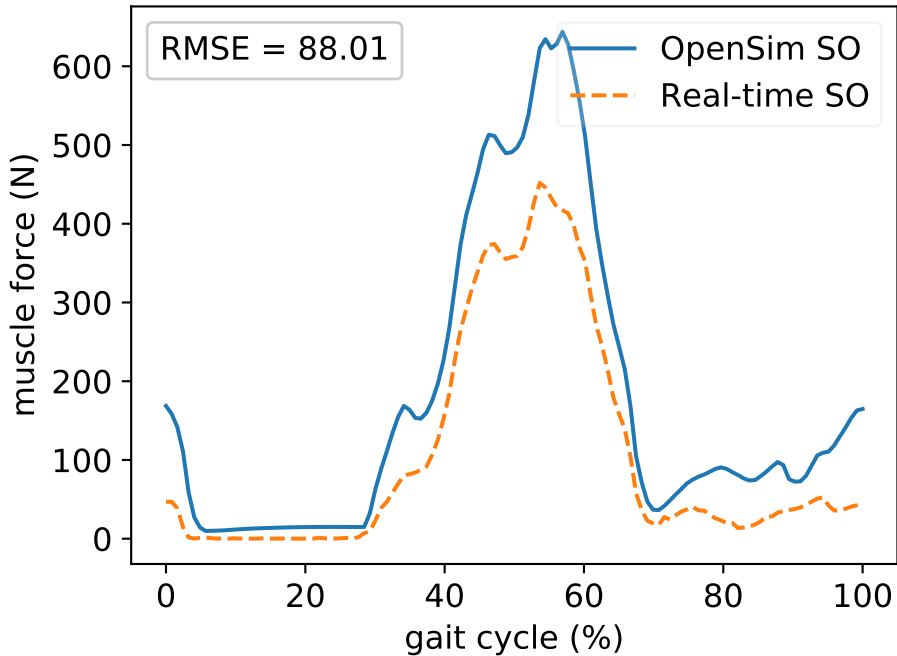



## quad\_fem\_r

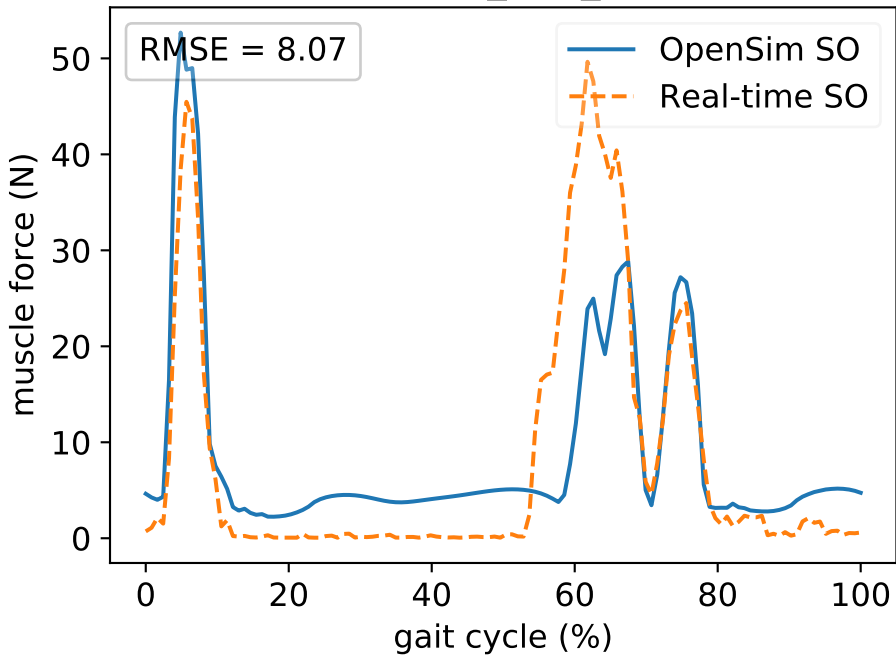

# gem\_r

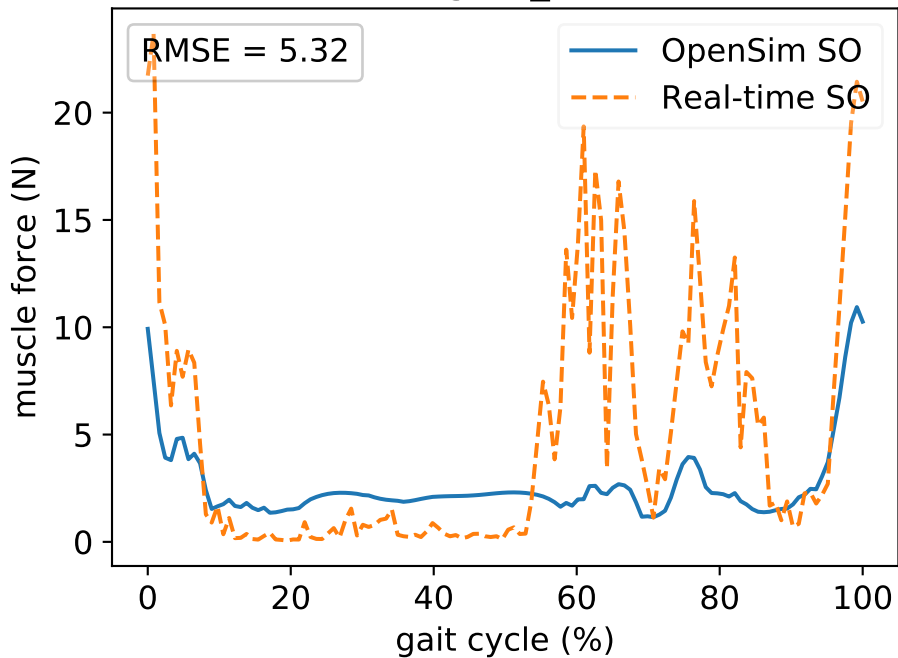

peri\_r

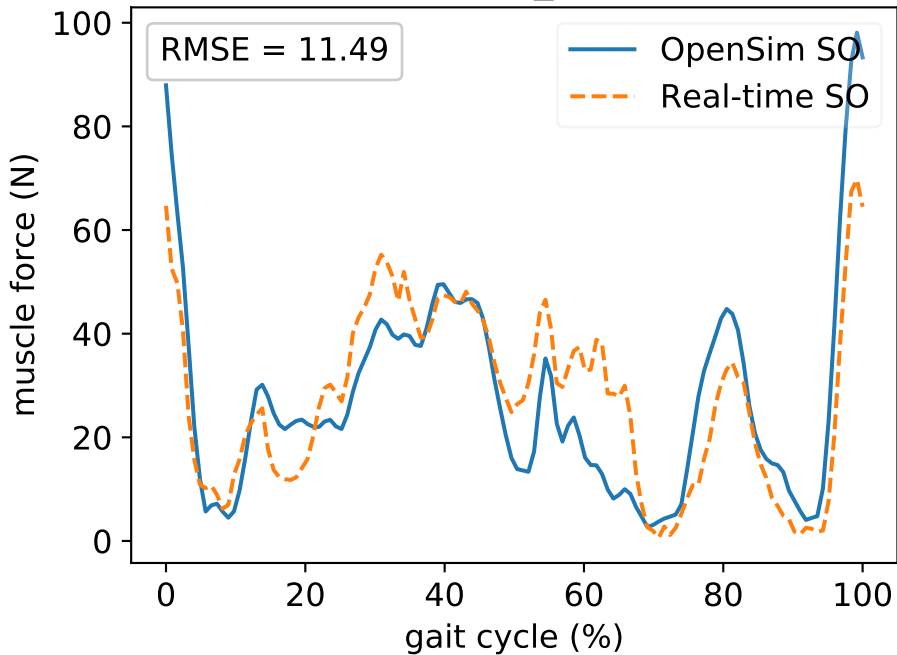

## rect\_fem\_r

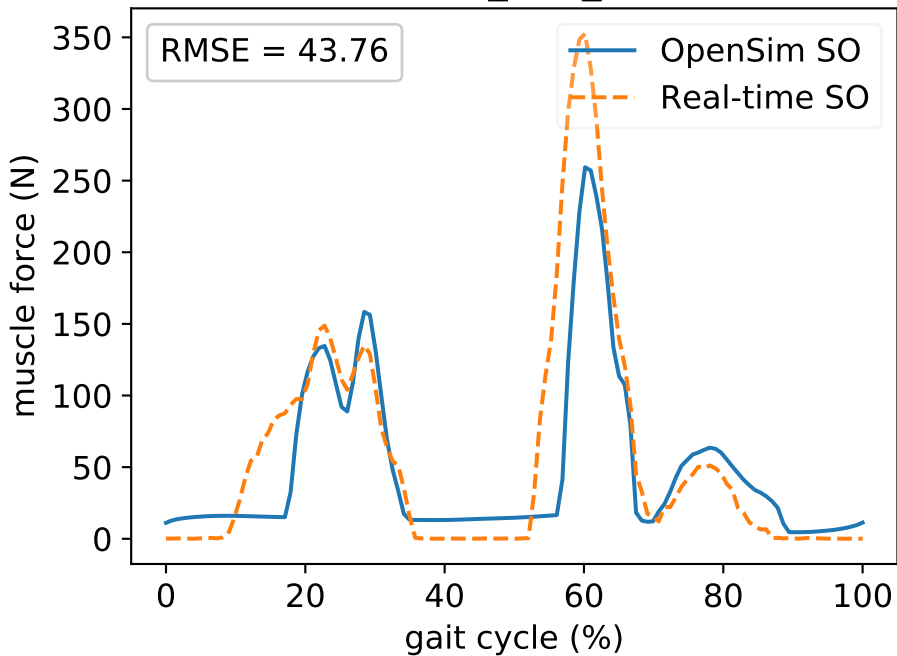

## vas\_med\_r

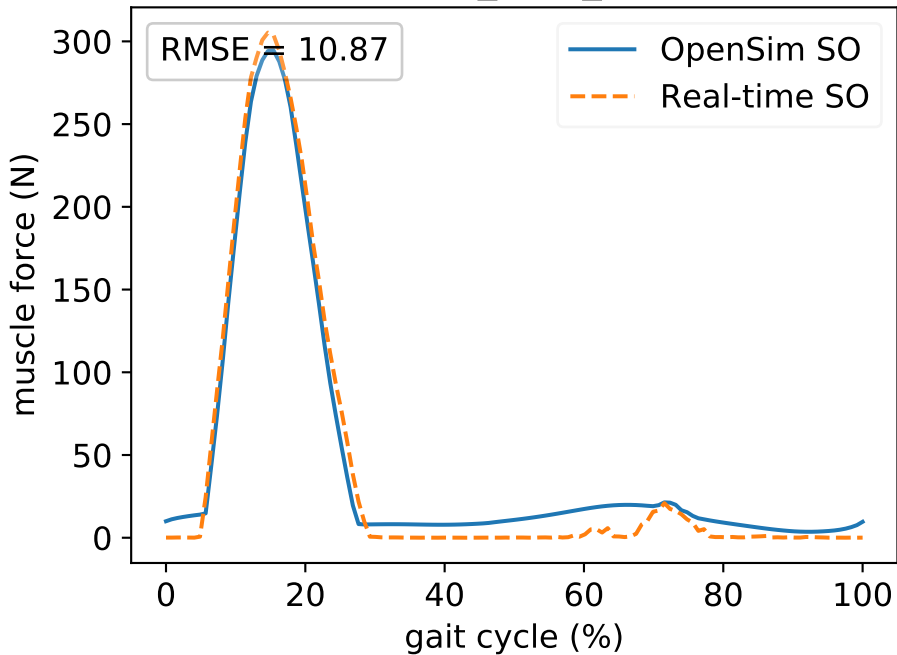

## vas\_int\_r

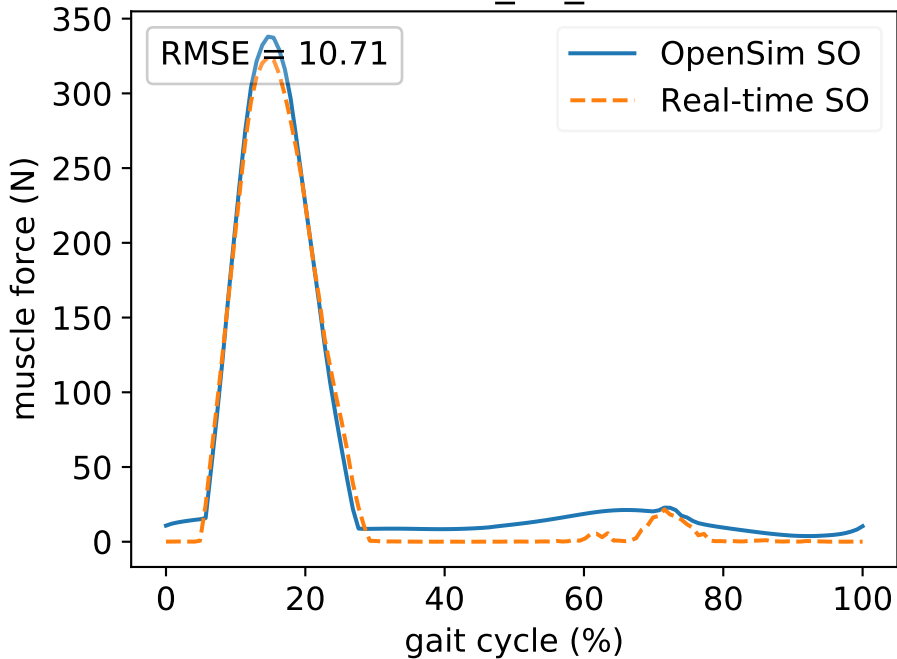

## vas\_lat\_r

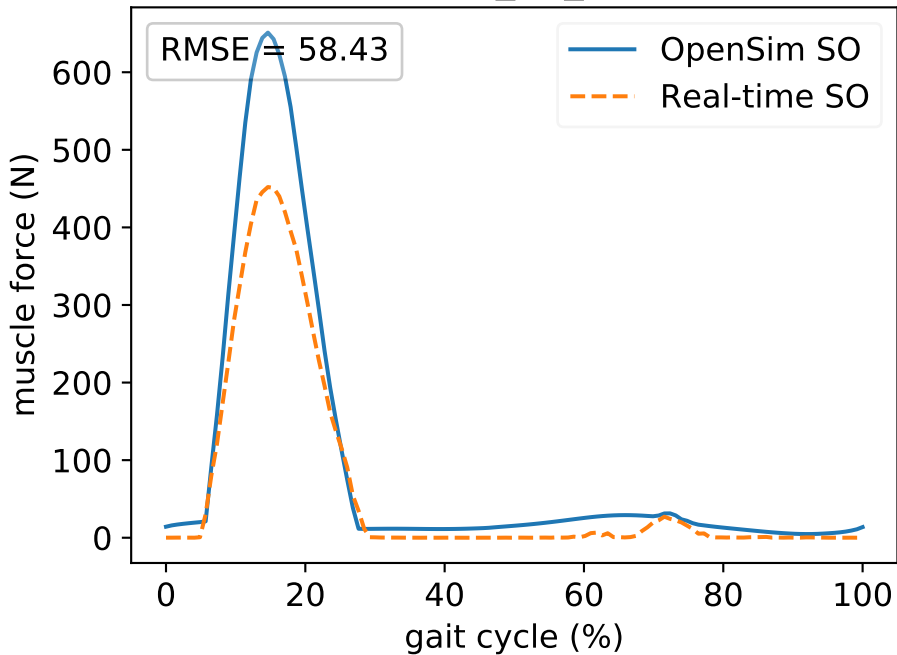

## med\_gas\_r

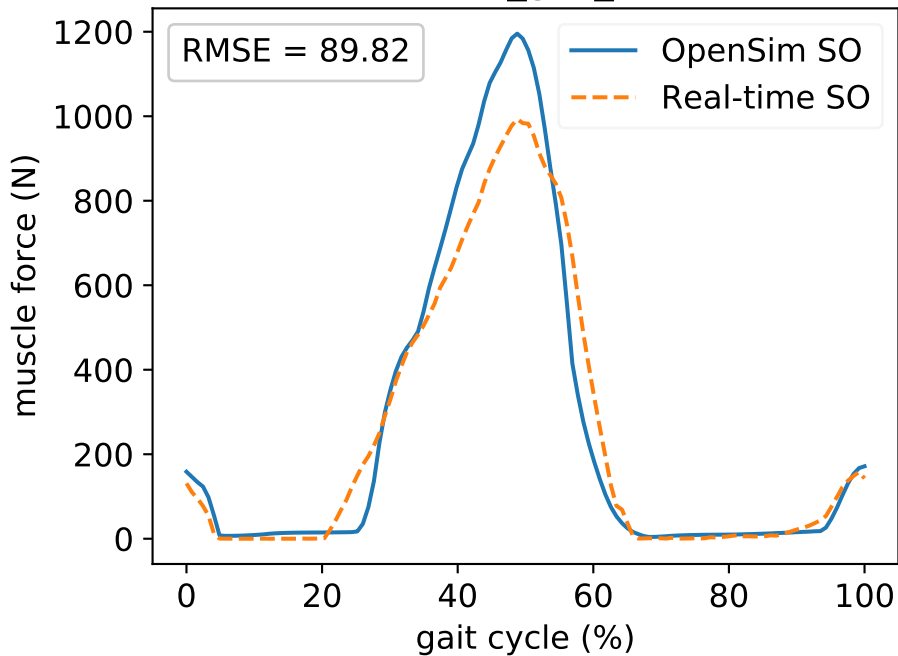



lat\_gas\_r

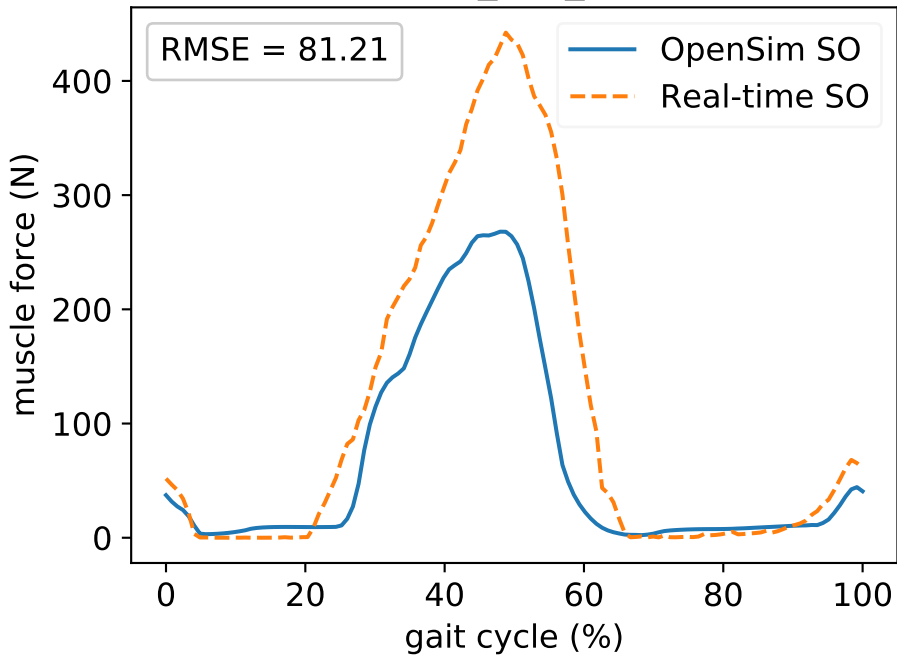

## soleus\_r

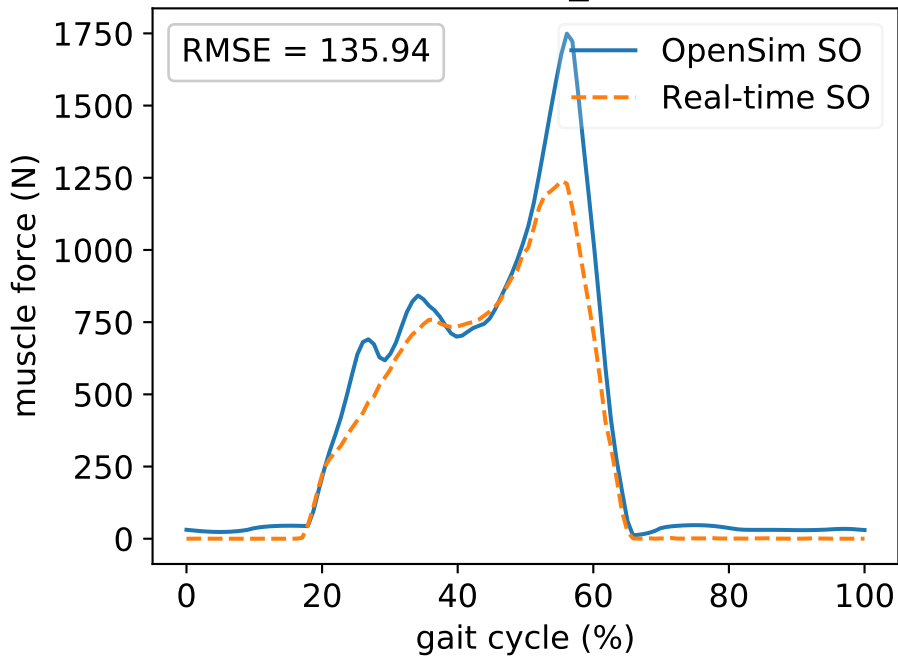

# tib\_post\_r

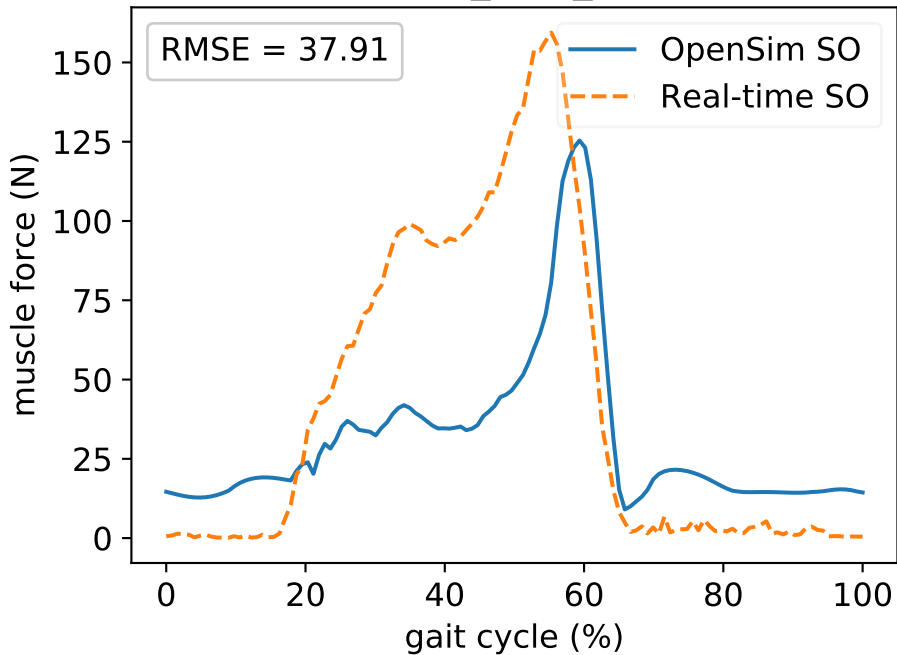

# flex\_dig\_r

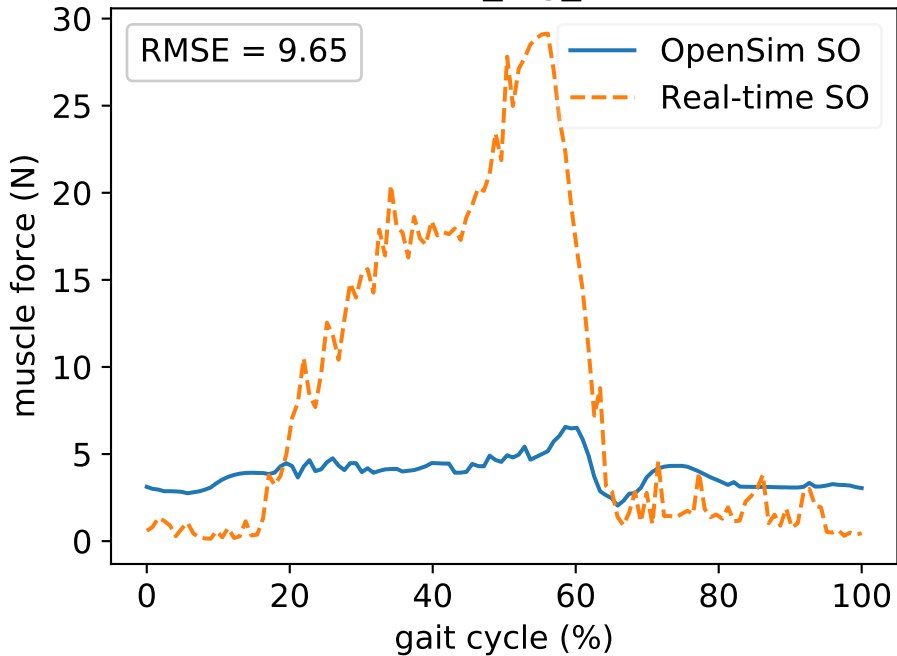

## flex\_hal\_r

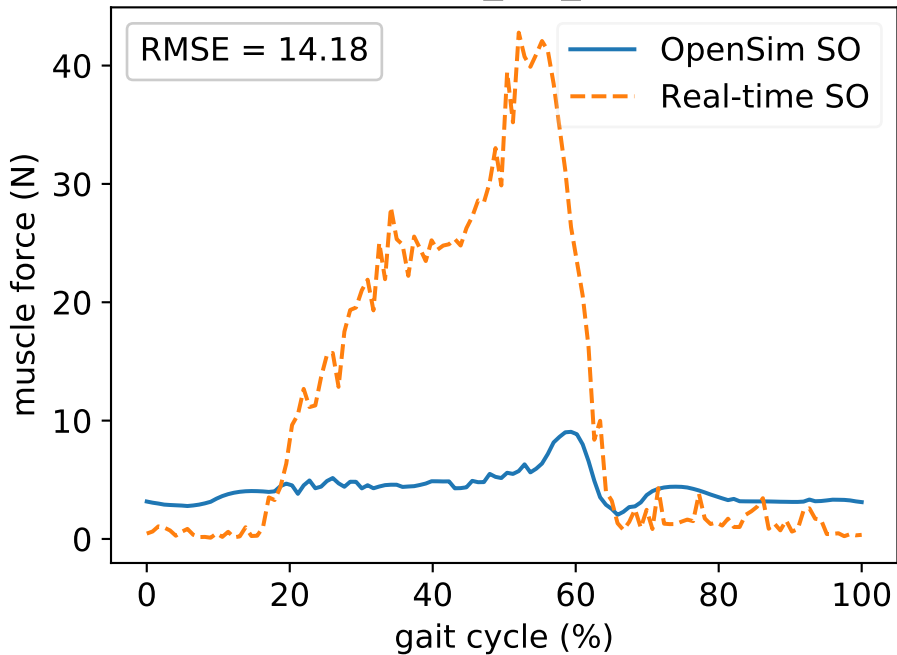

# tib\_ant\_r

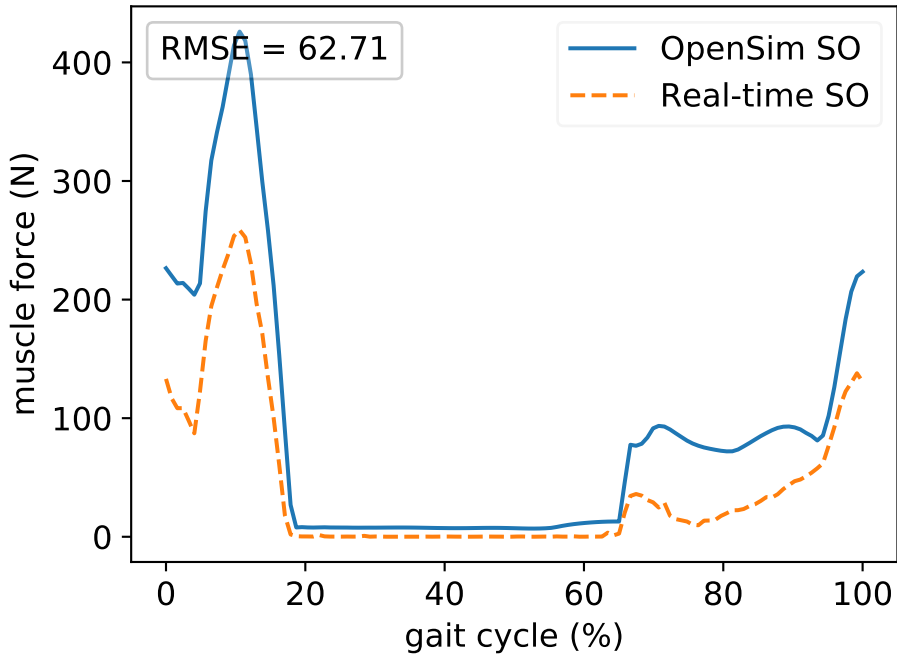

per\_brev\_r

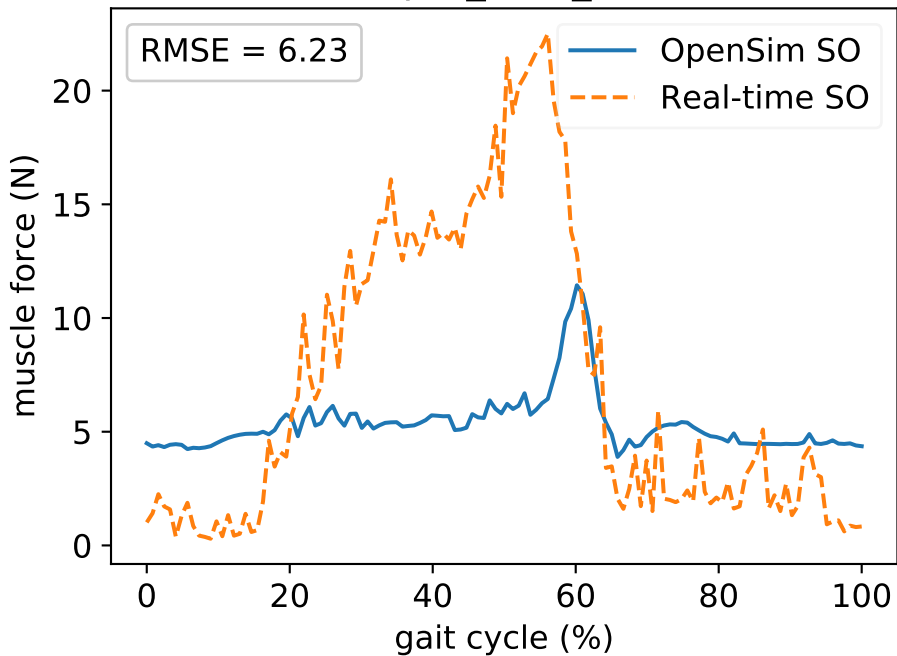

per\_long\_r

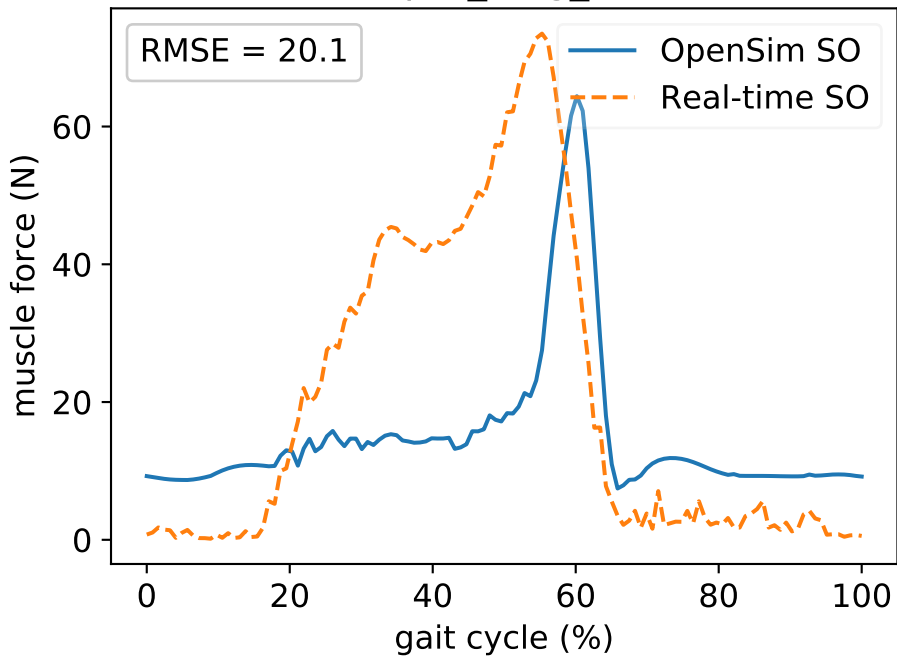



per\_tert\_r

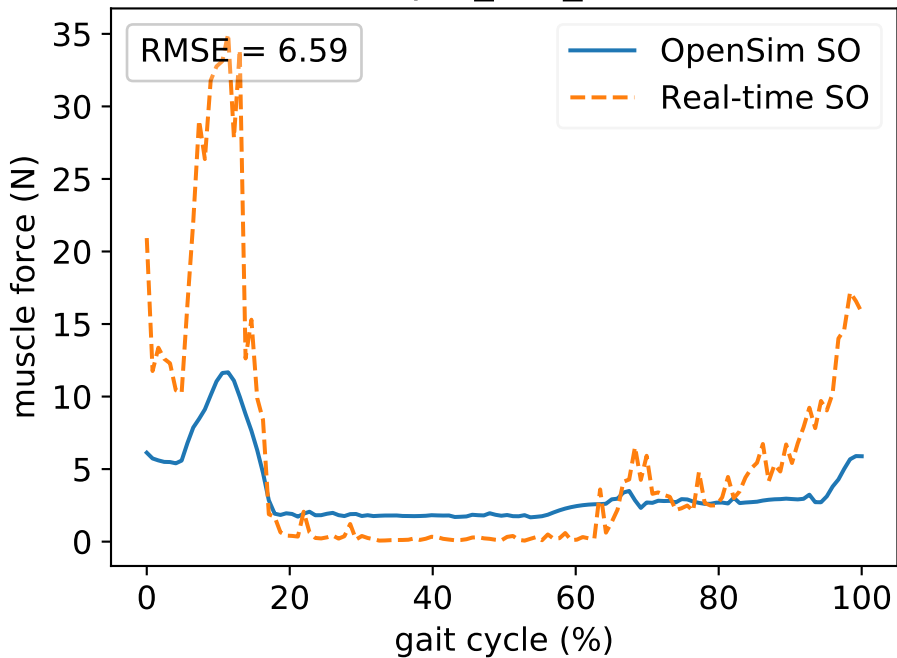

## ext\_dig\_r

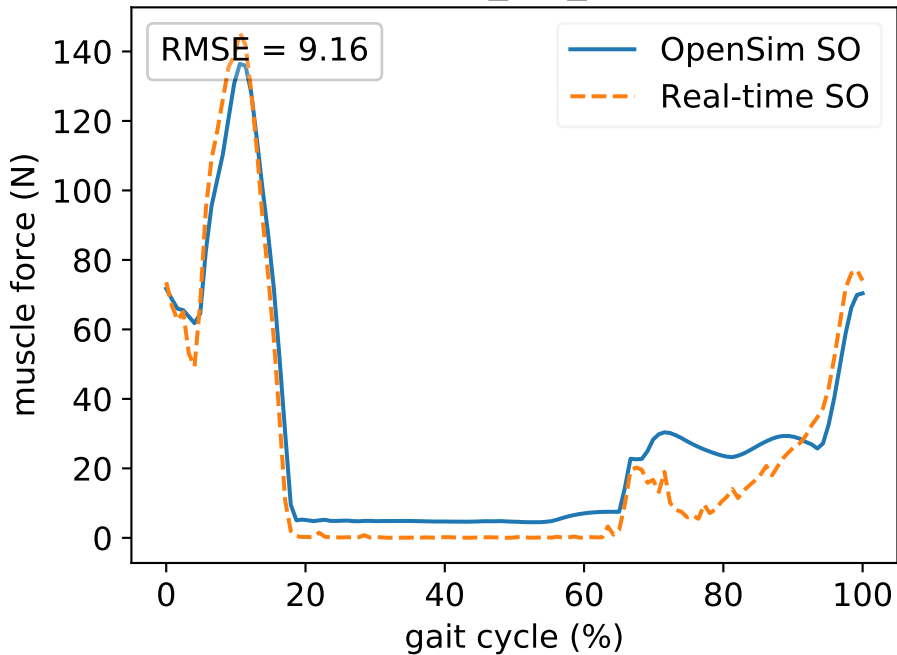

## ext\_hal\_r

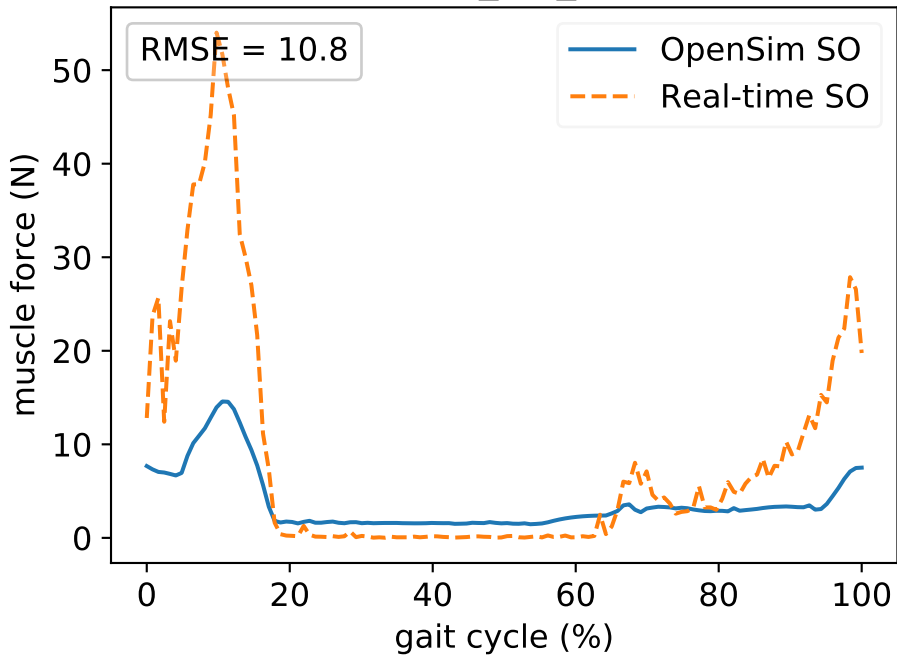

# glut\_med1\_l

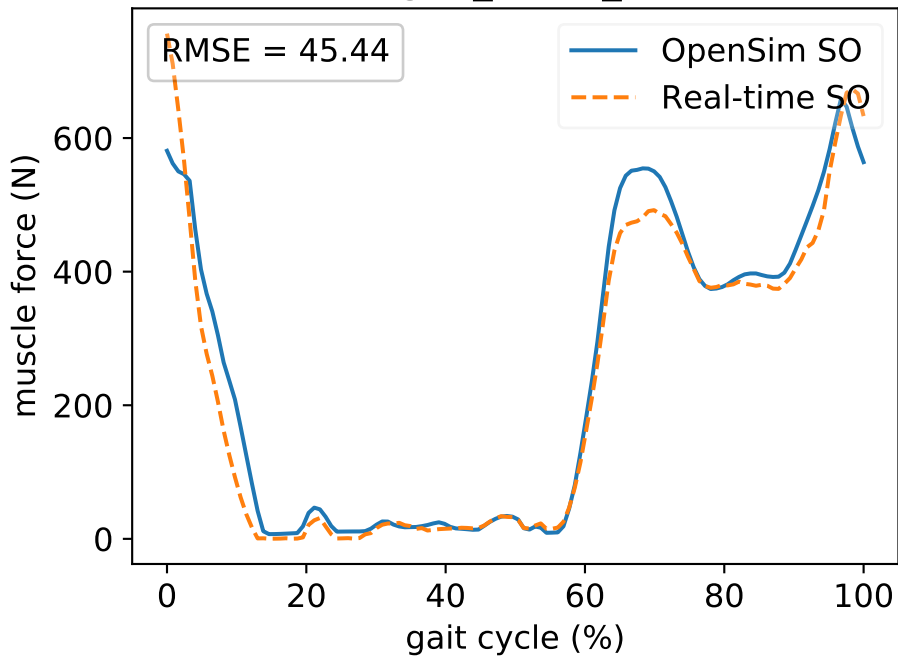

## glut\_med2\_l

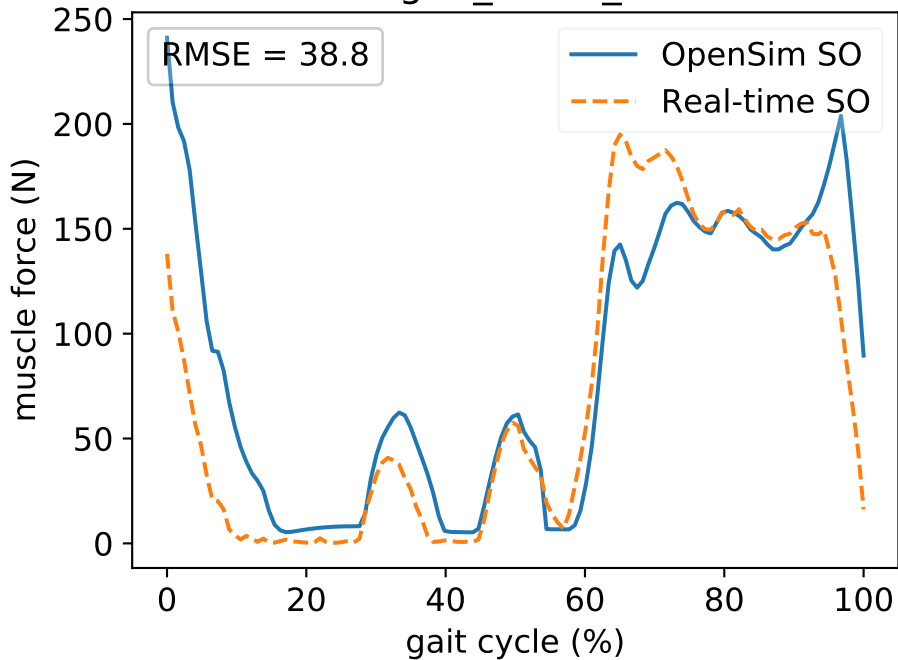

# glut\_med3\_l

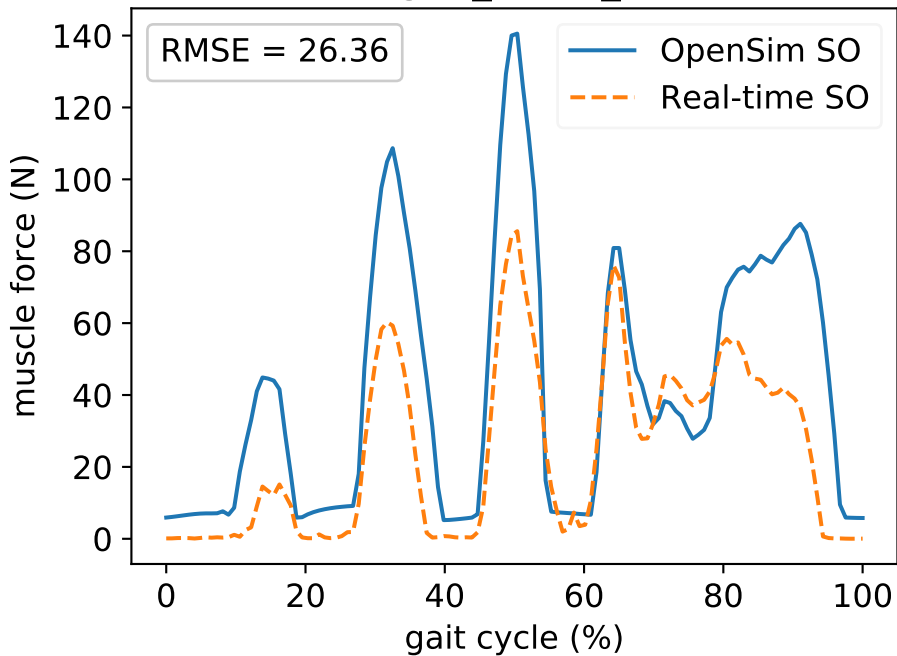

# glut\_min1\_l

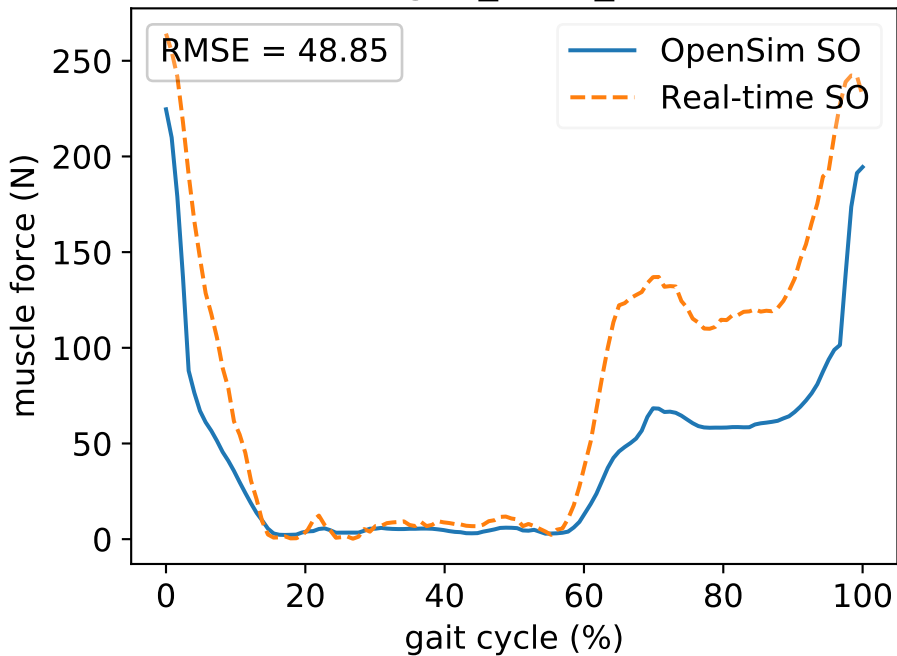

## glut\_min2\_l

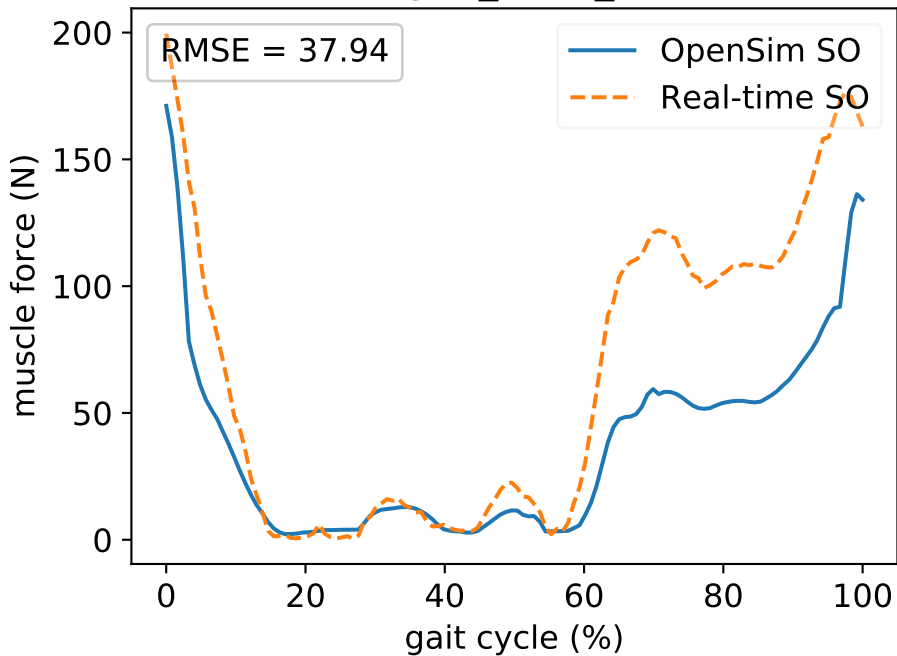



# glut\_min3\_l

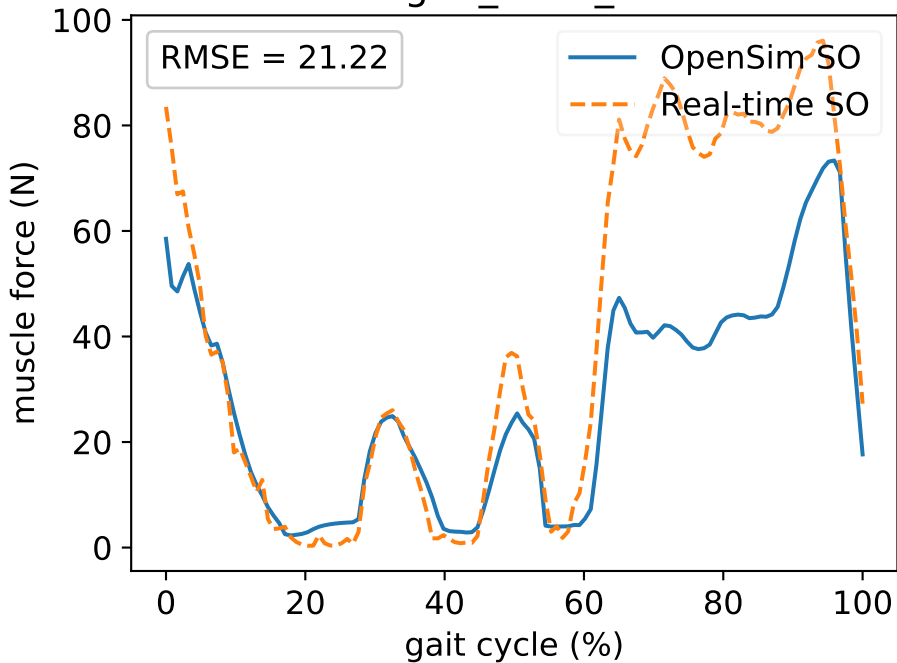

# semimem\_l

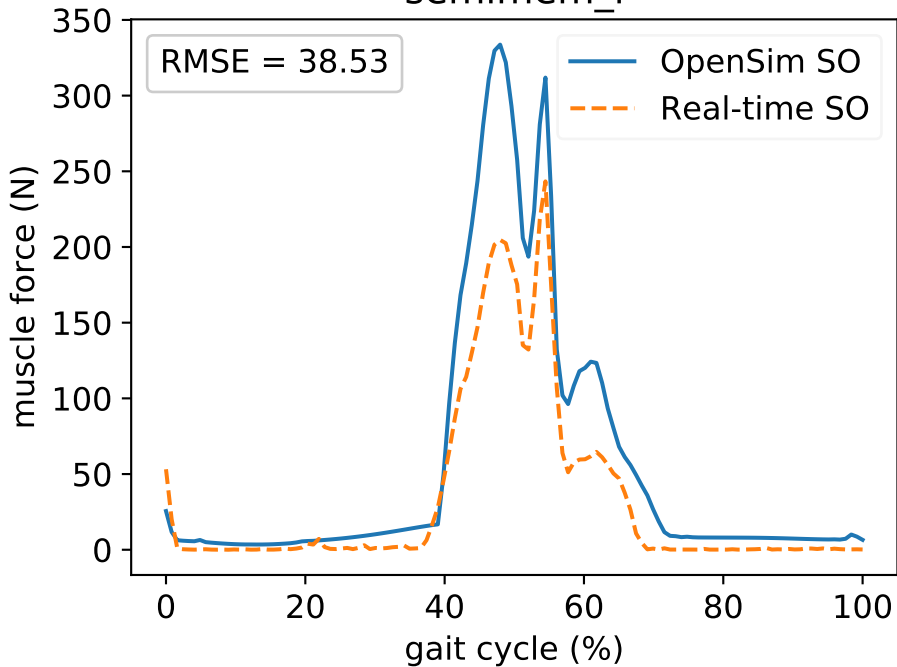

# semiten\_l

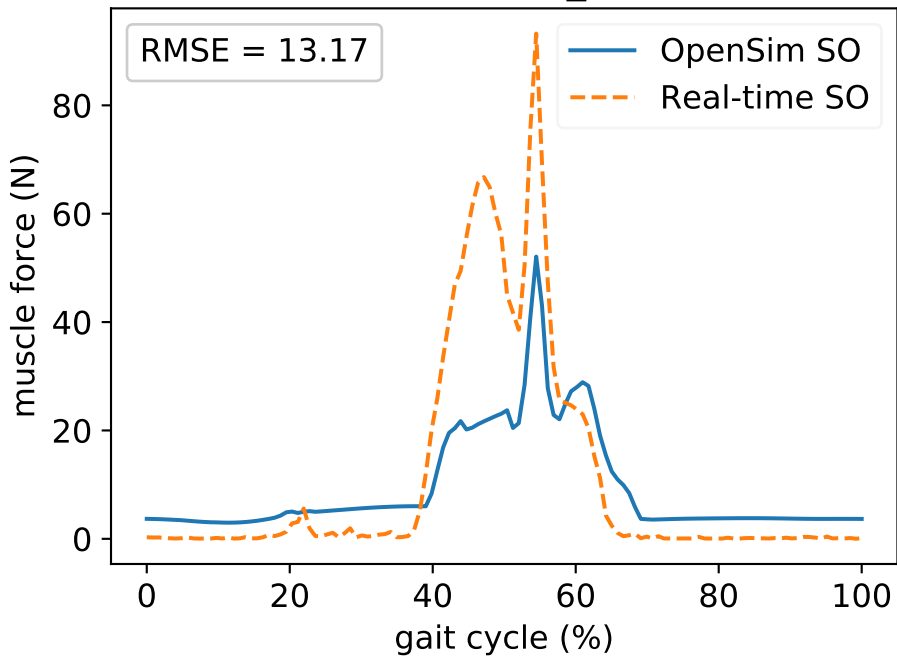

# bifemlh\_l

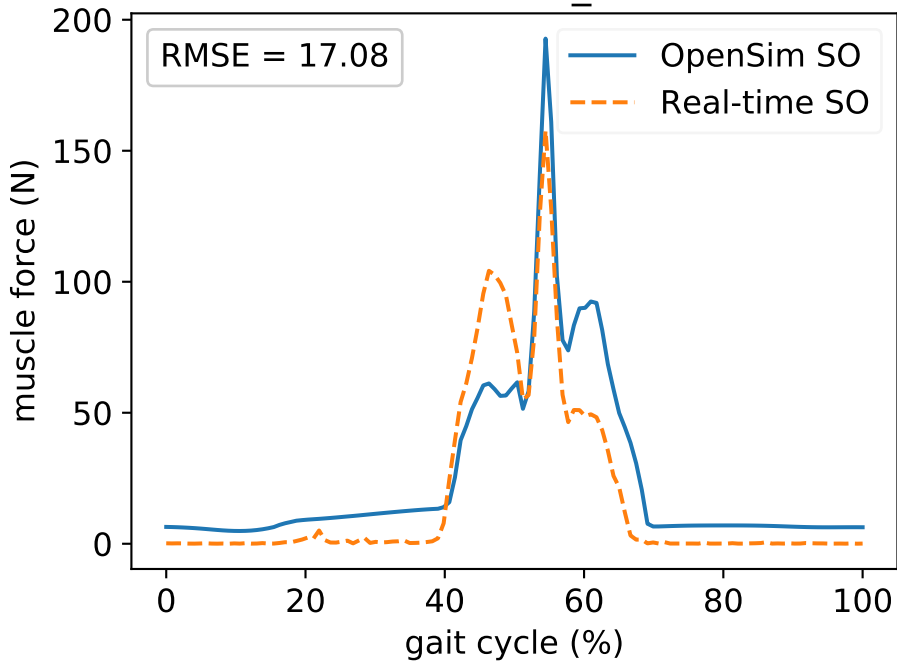

# bifemsh\_l

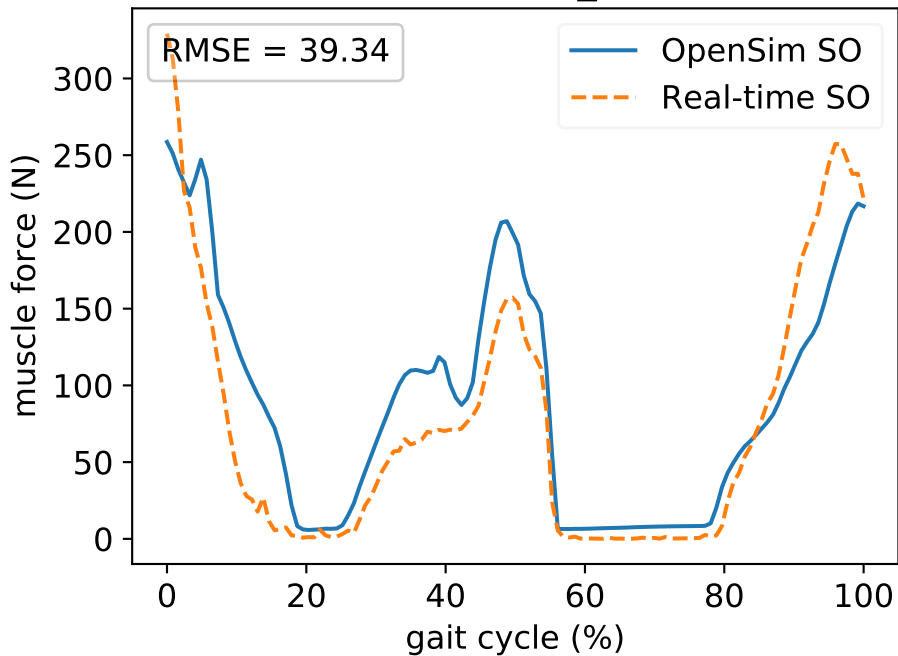

sar\_l

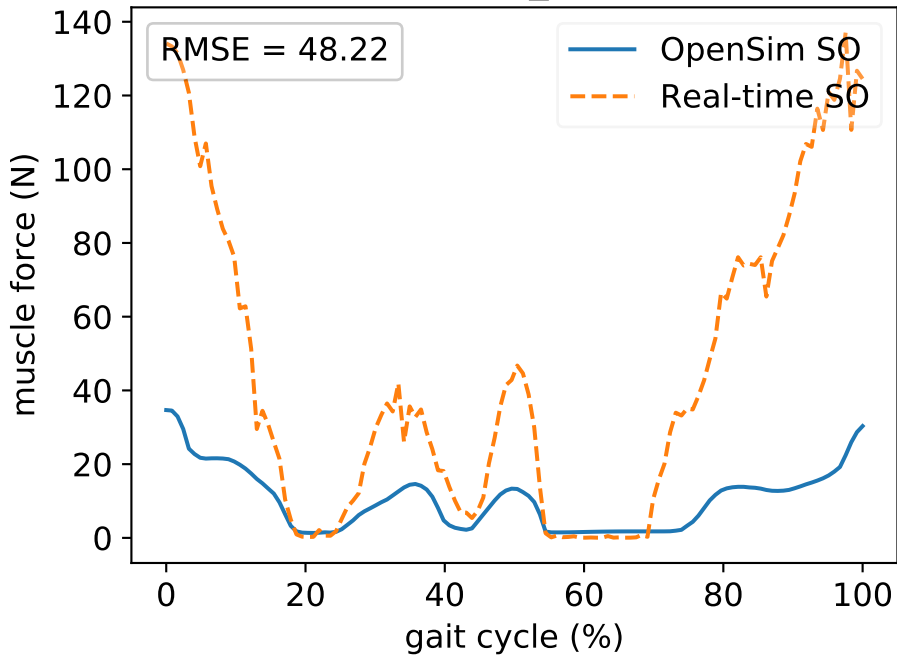

# add\_long\_l

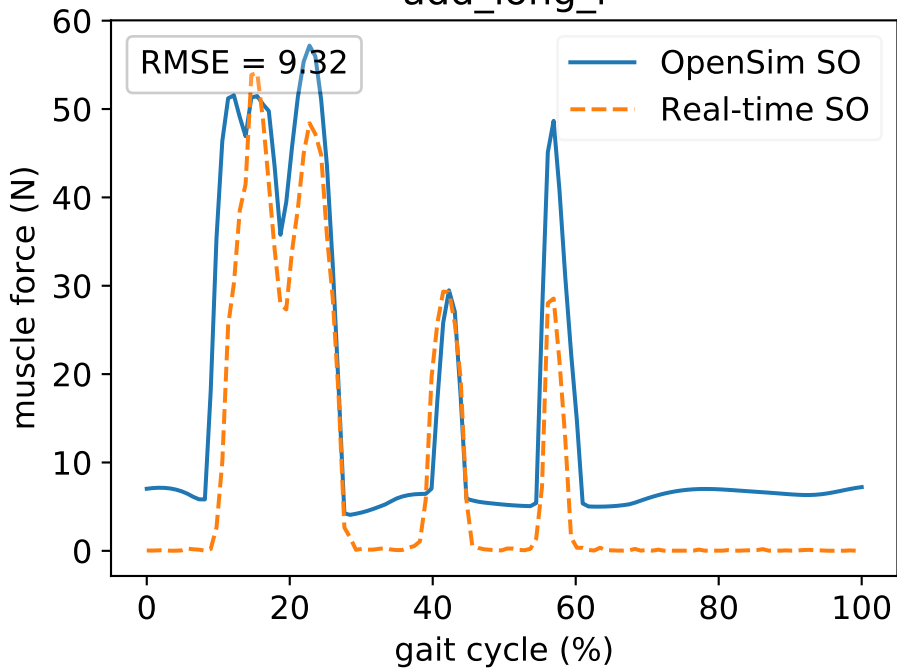

add\_brev\_l

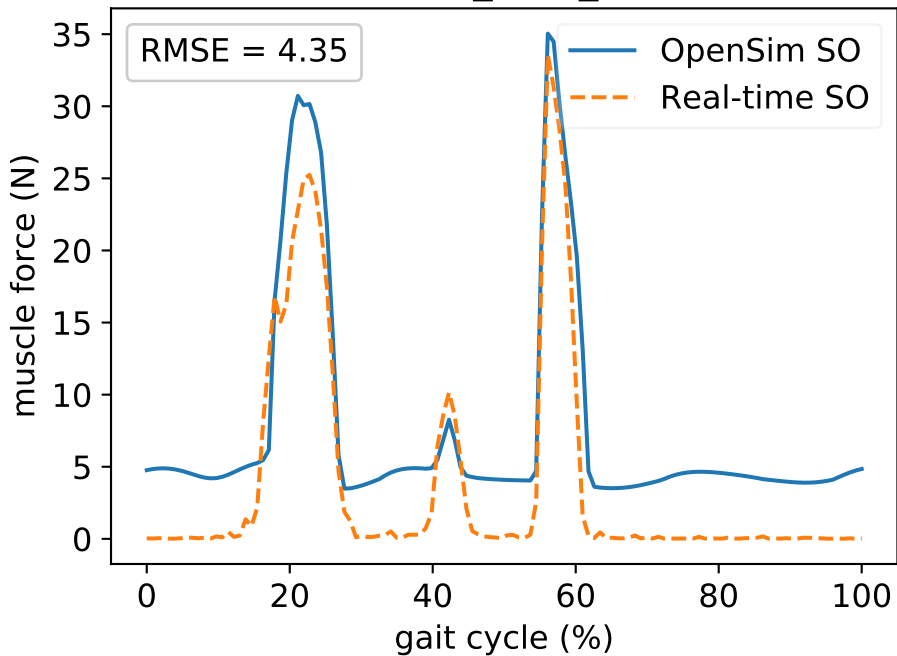



# add\_mag1\_l

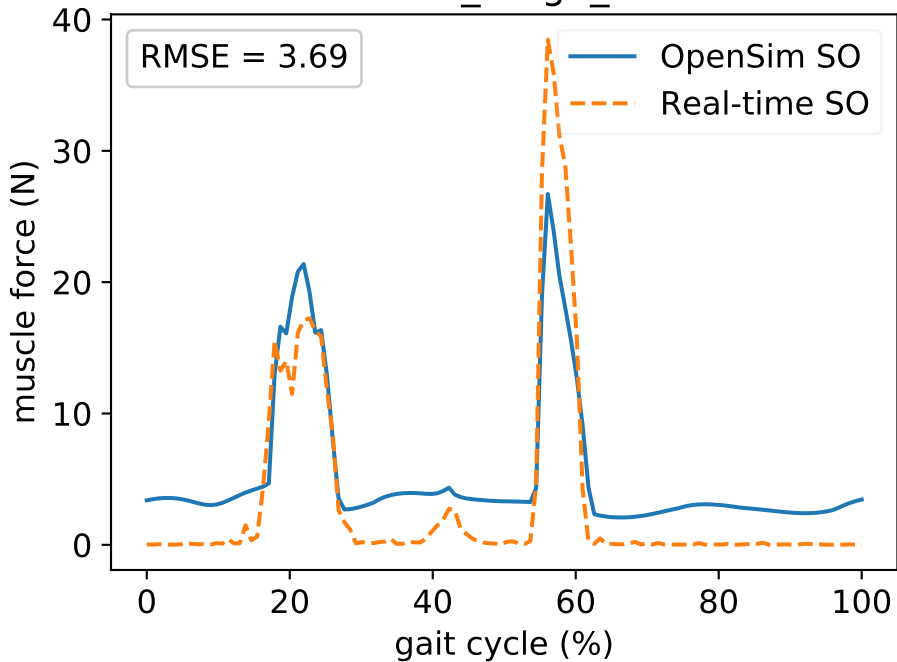

## add\_mag2\_l

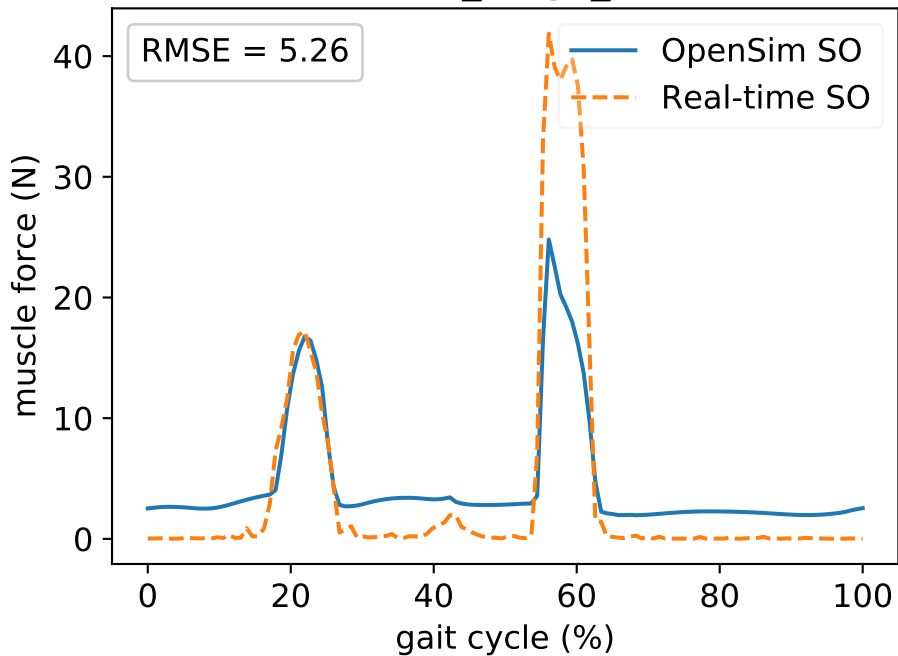

# add\_mag3\_l

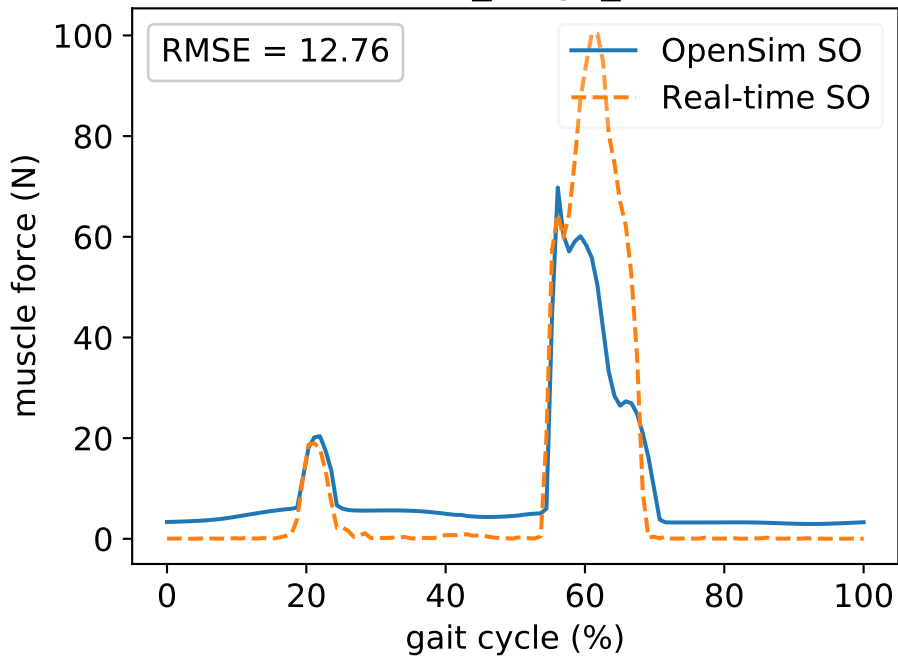

tfl\_l

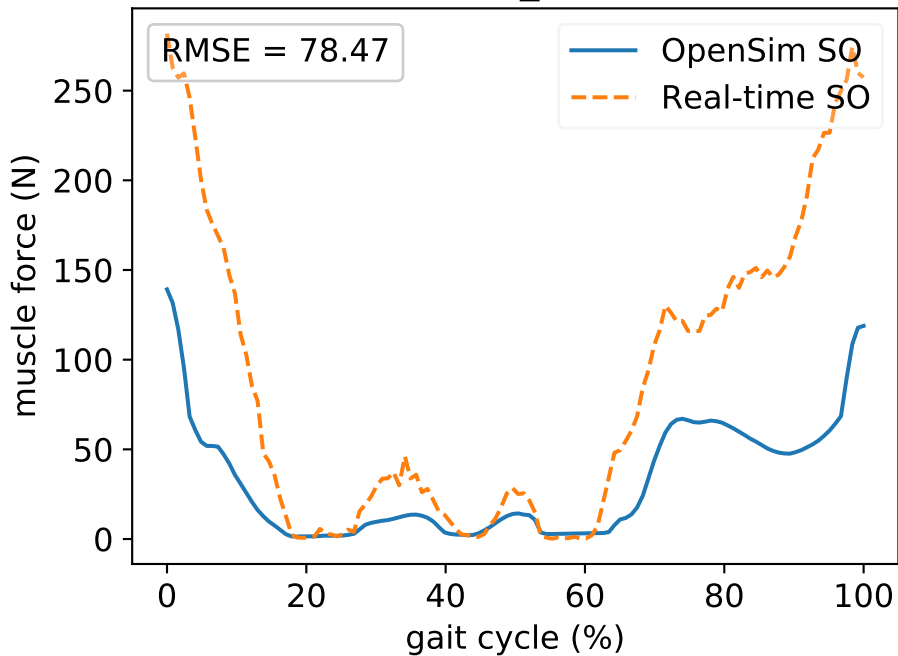

pect\_l

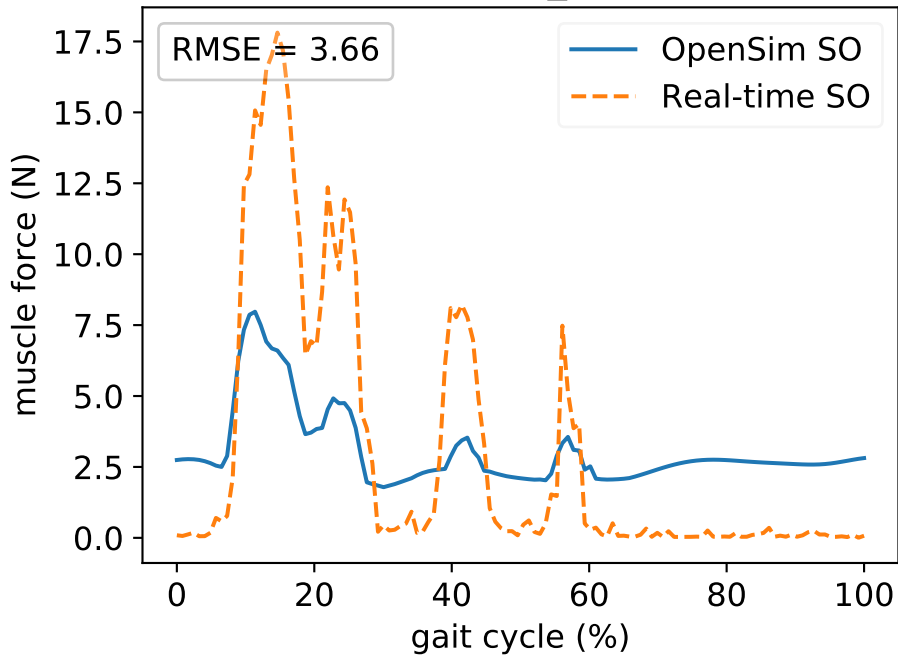

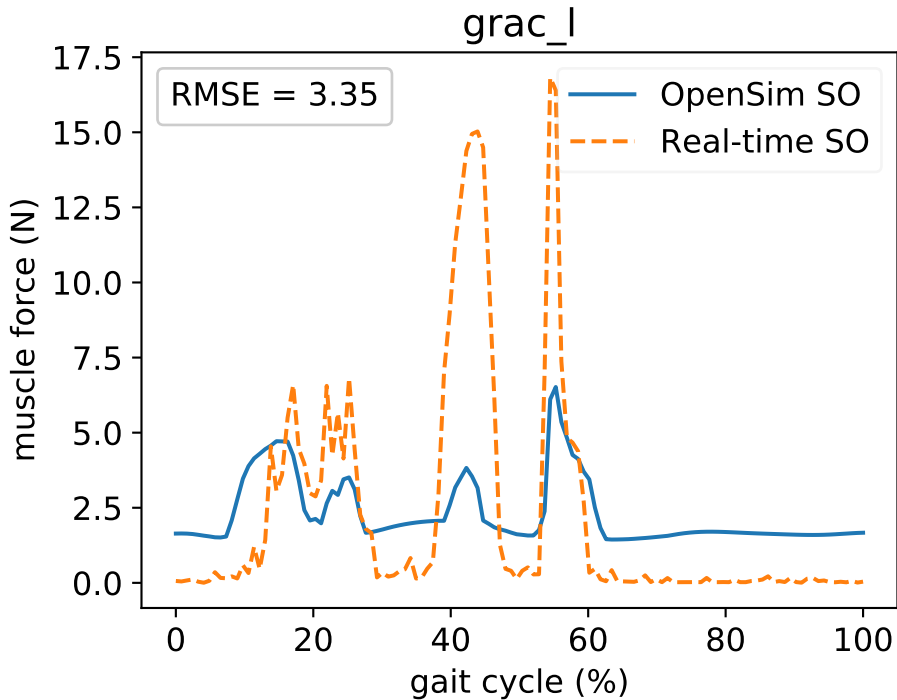

# glut\_max1\_l

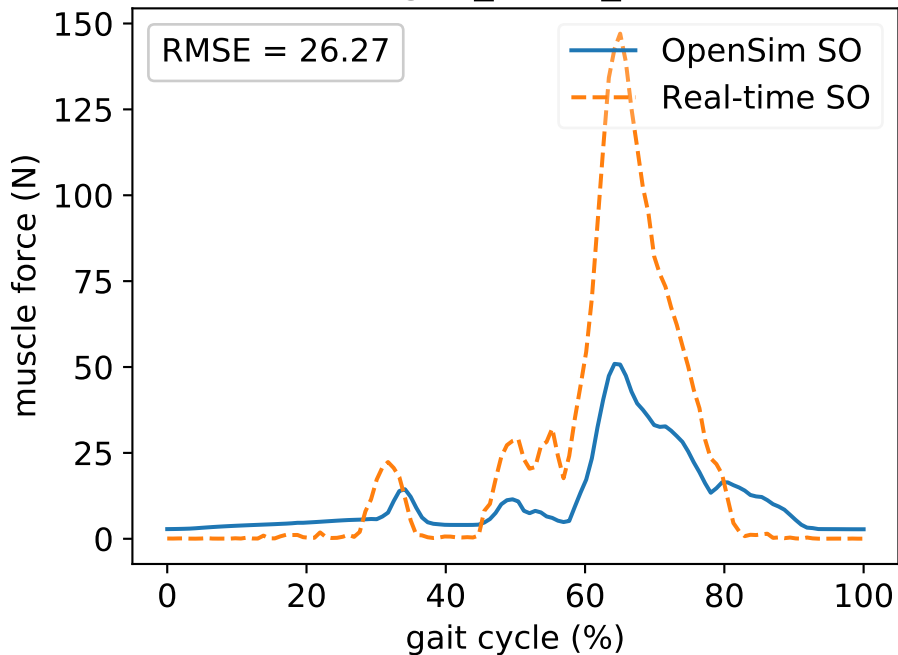

# glut\_max2\_l

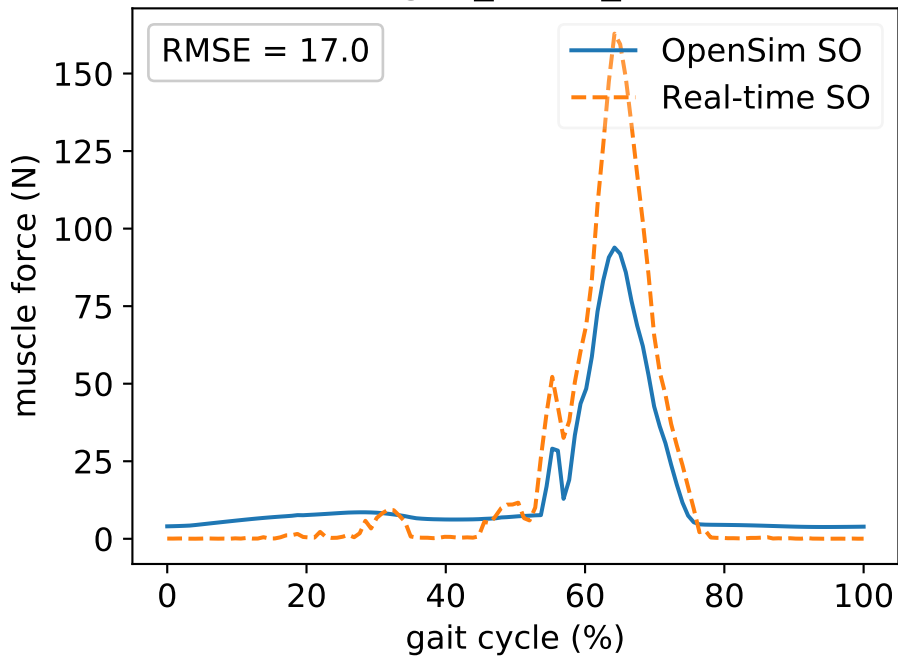



# glut\_max3\_l

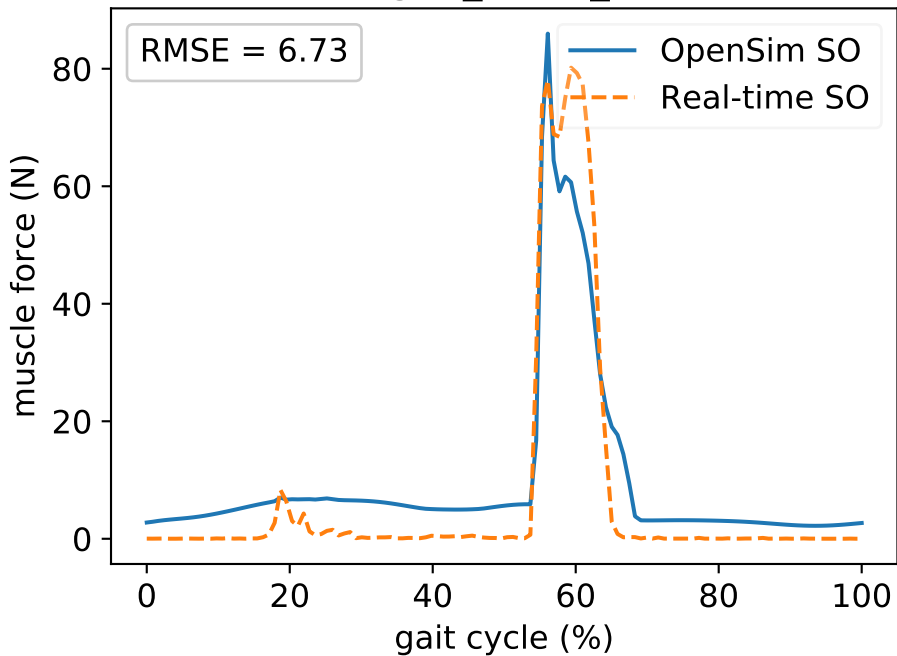

## iliacus\_l

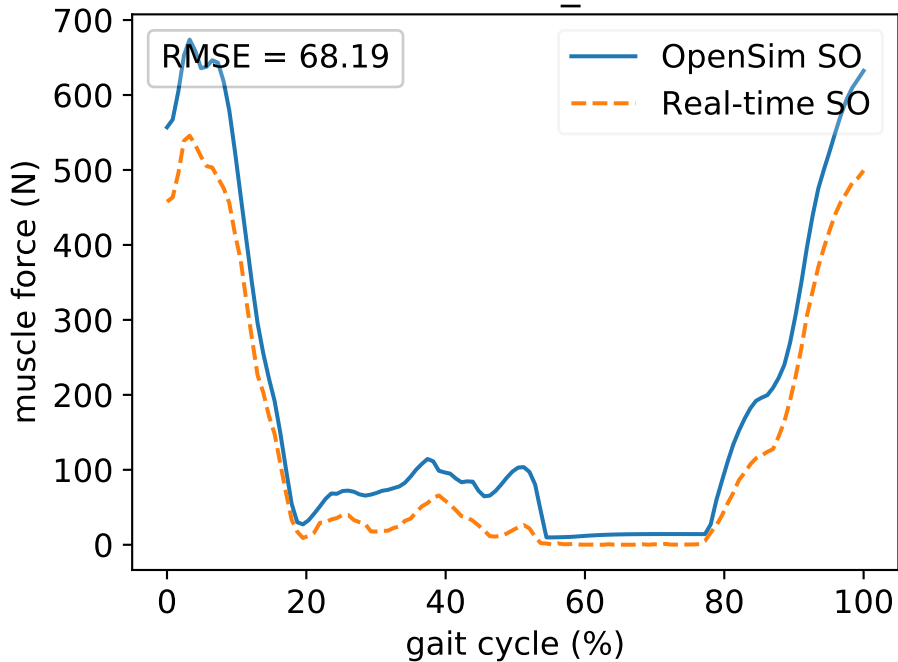

# psoas\_l

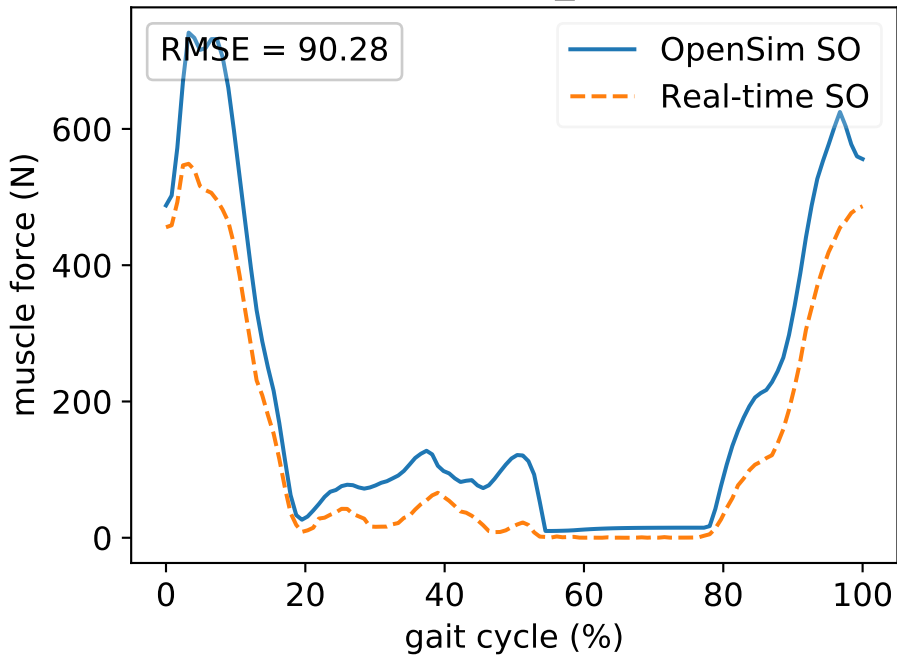

# quad\_fem\_l

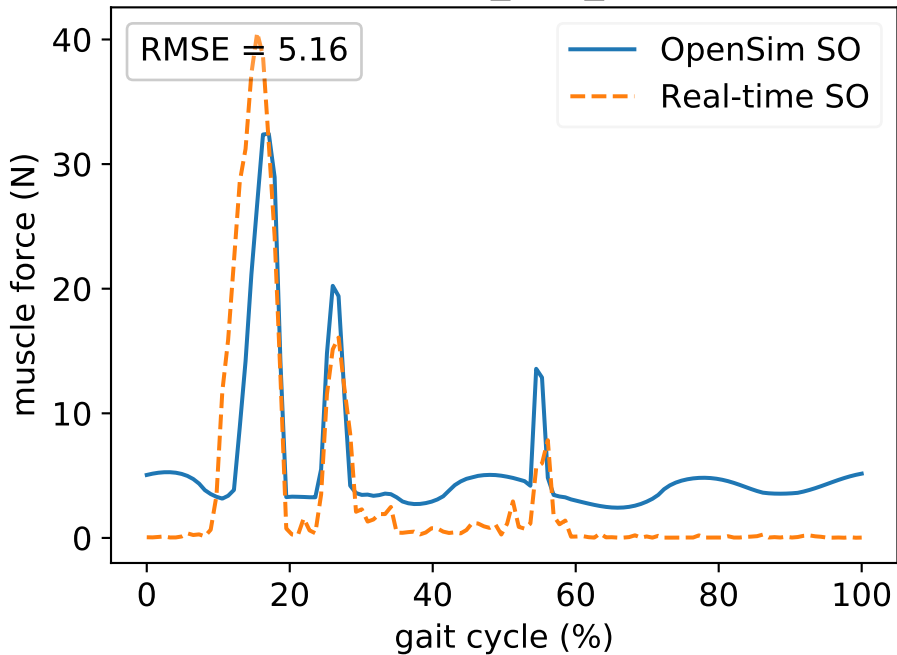

gem\_l

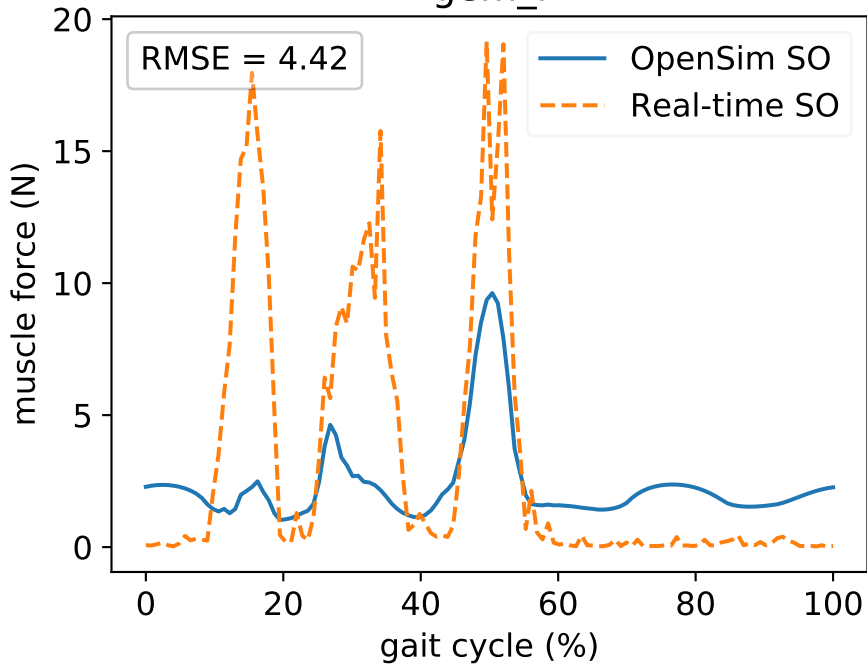

peri\_l

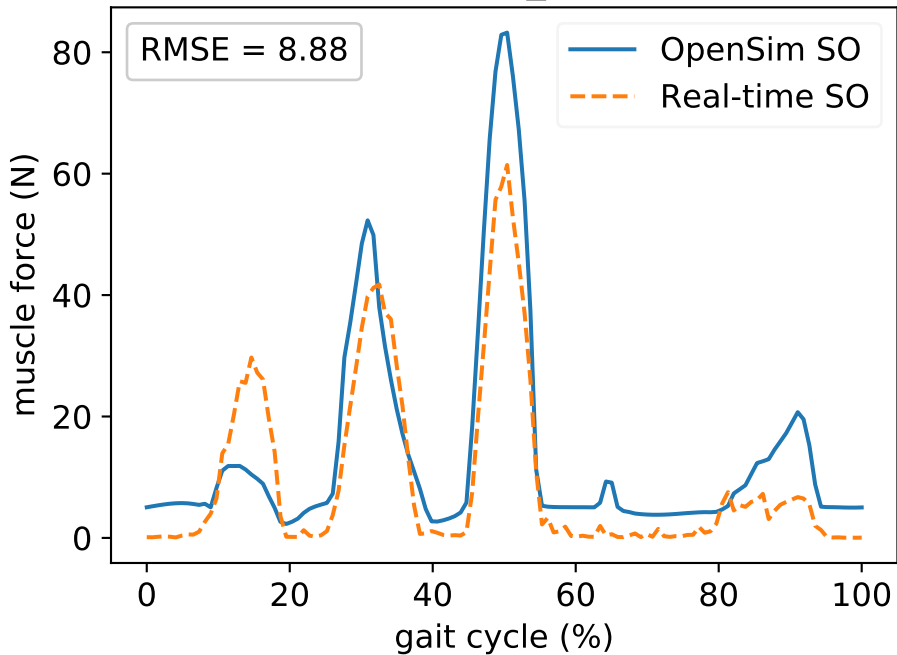

## rect\_fem\_l

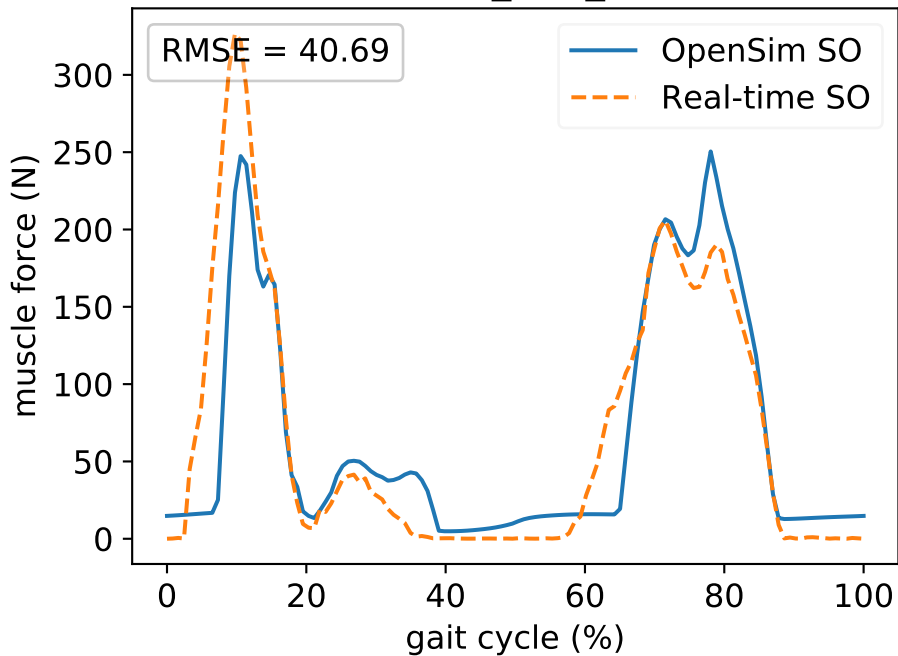

## vas\_med\_l

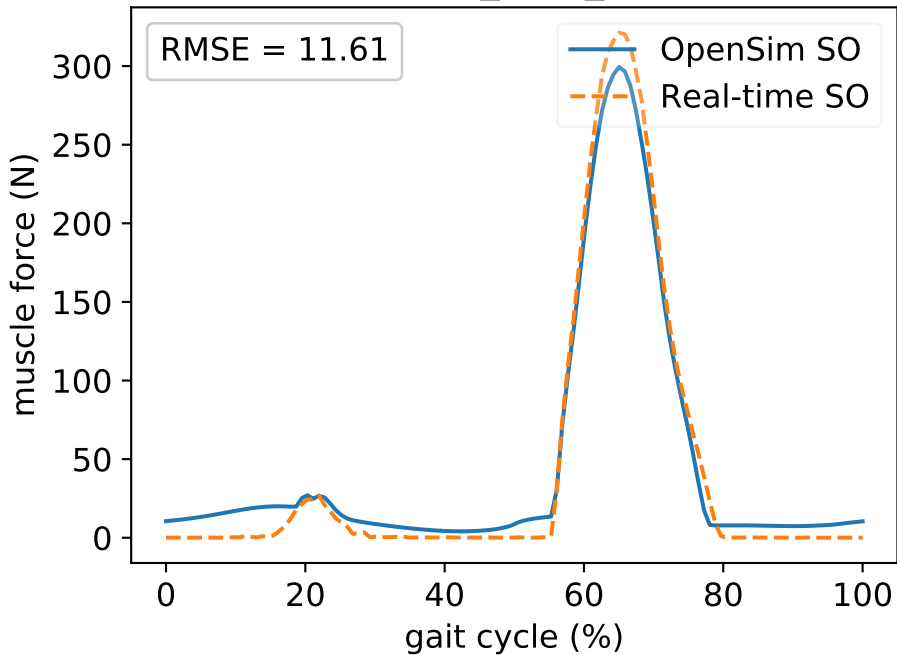



vas\_int\_l

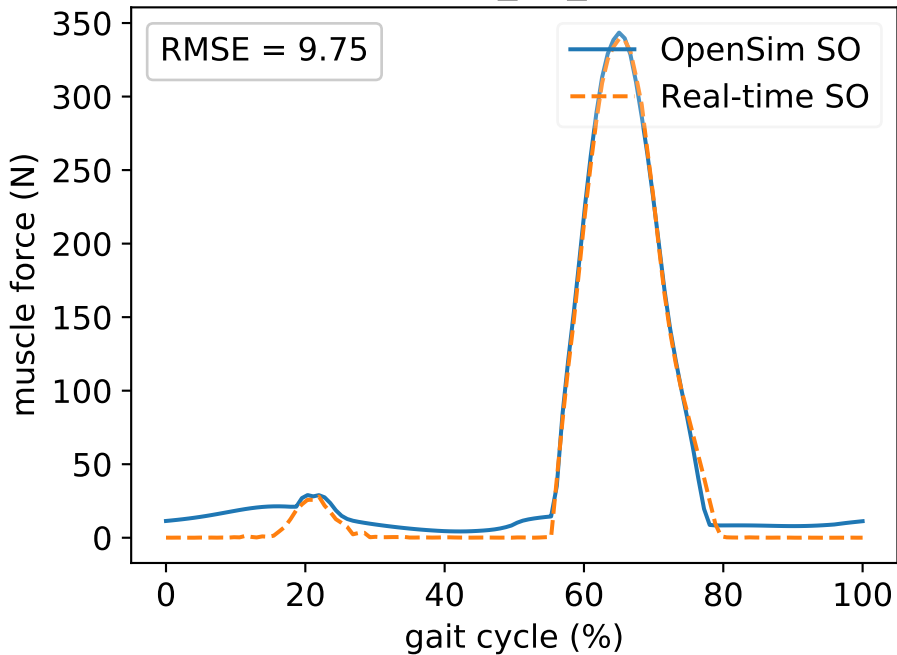

# vas\_lat\_l

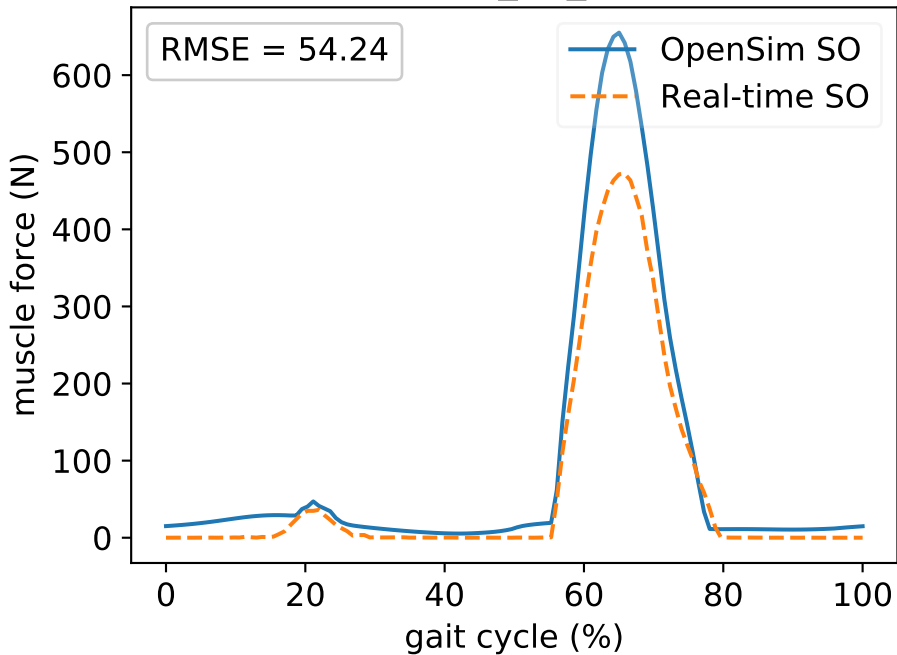

# med\_gas\_l

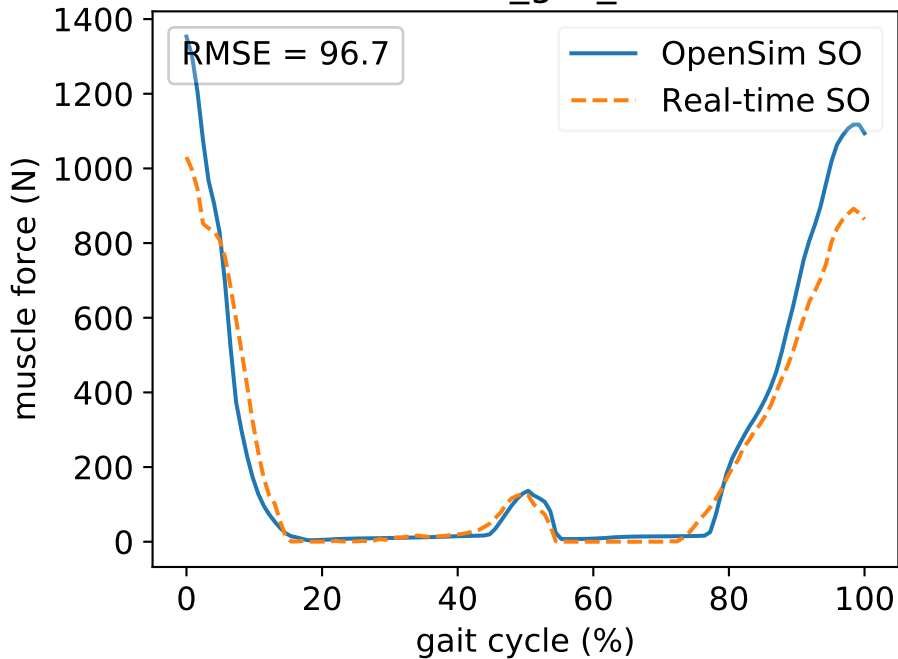

lat\_gas\_l

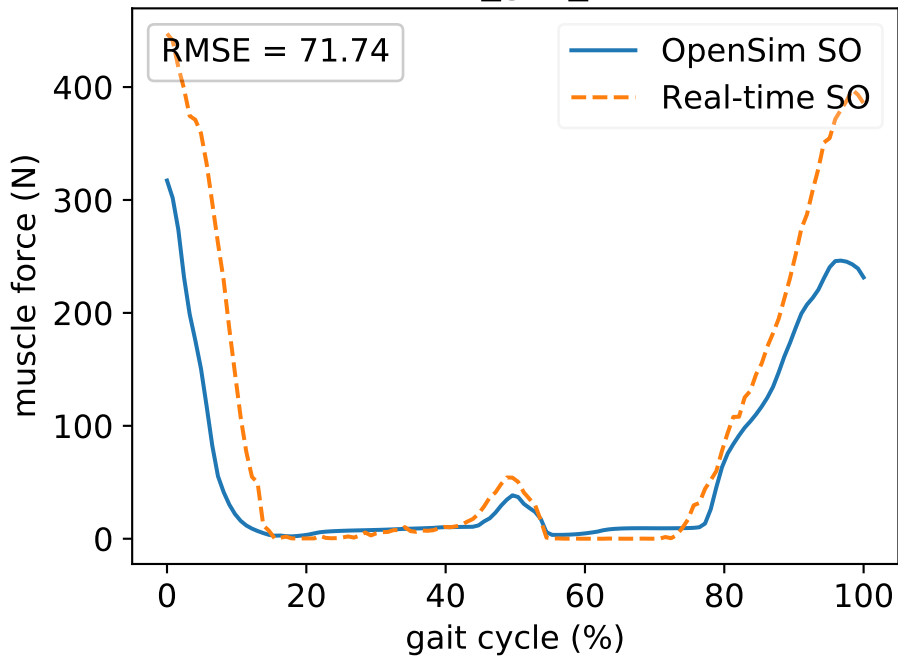

# soleus\_l

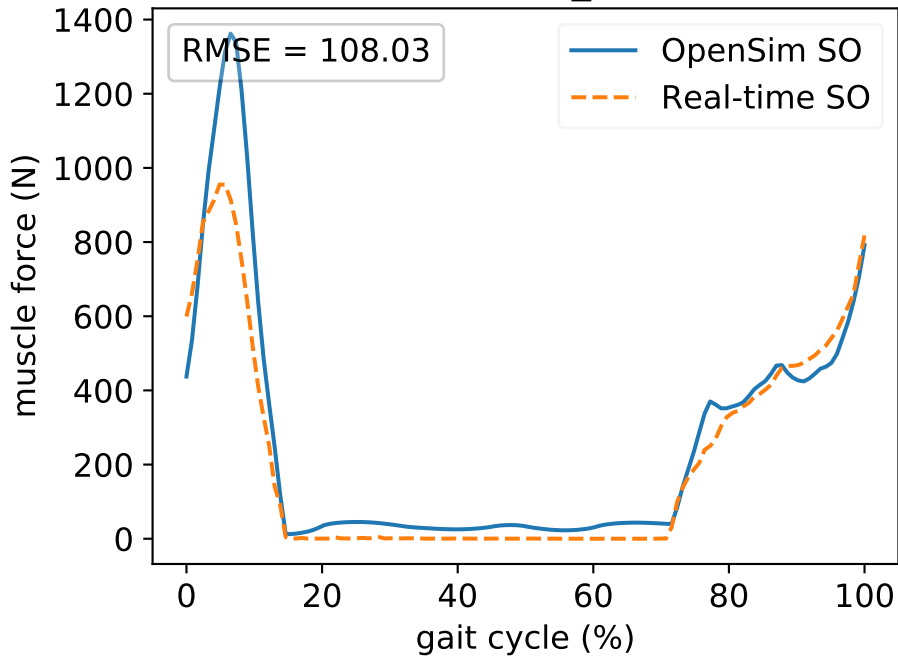

# tib\_post\_l

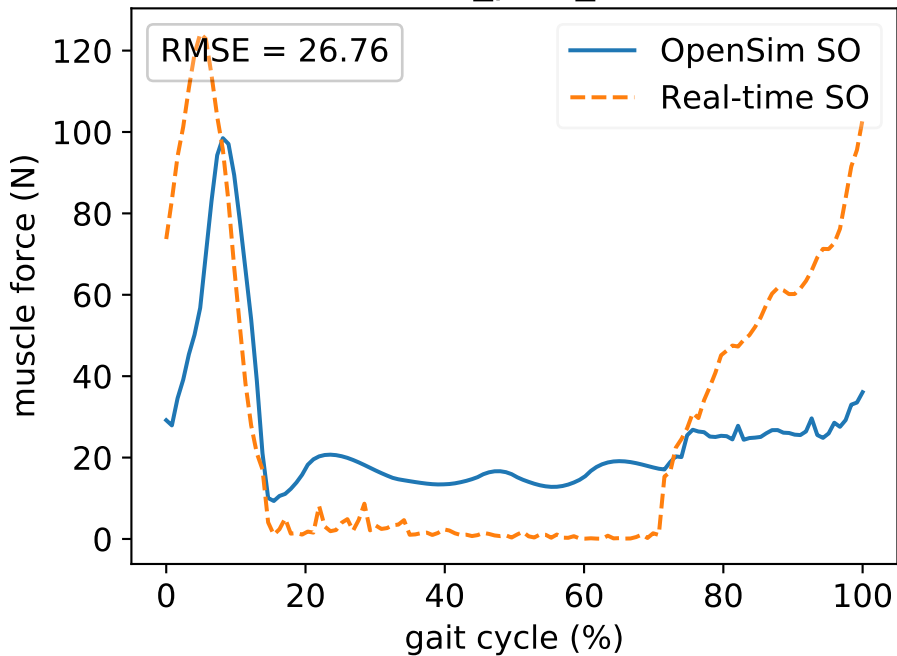

## flex\_dig\_I

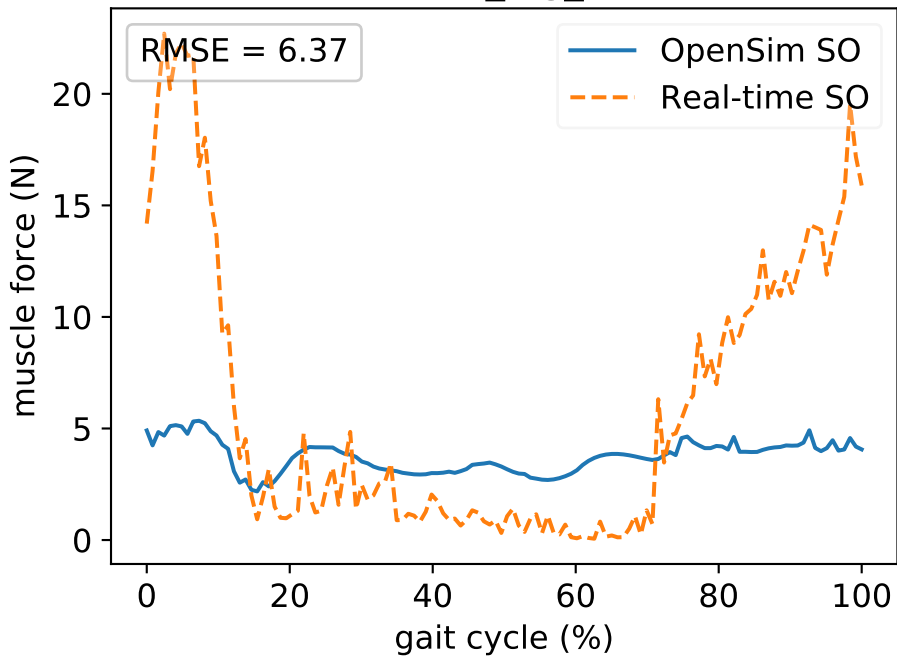

## flex\_hal\_l

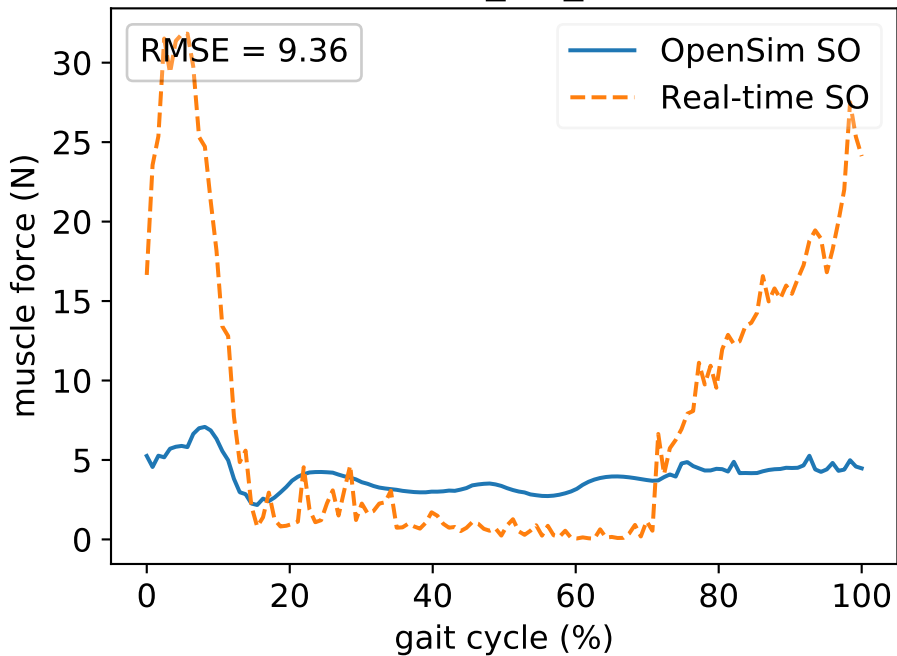



# tib\_ant\_l

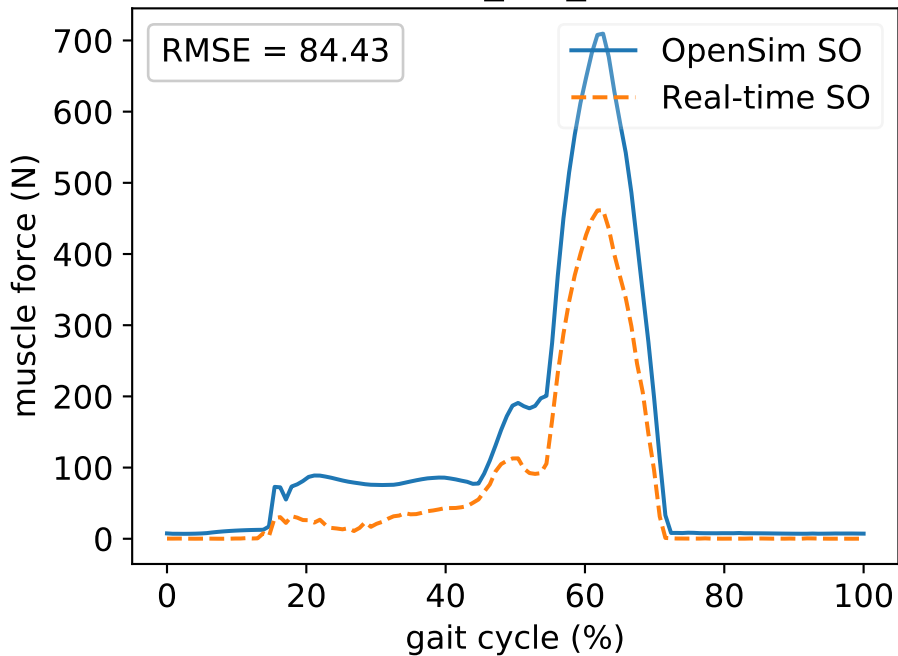

per\_brev\_l

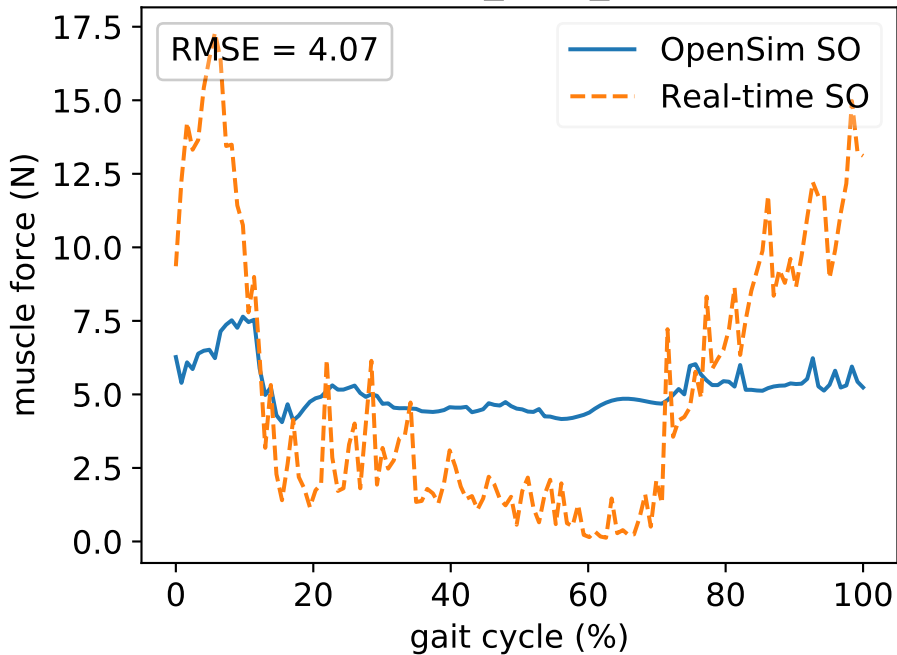

# per\_long\_l

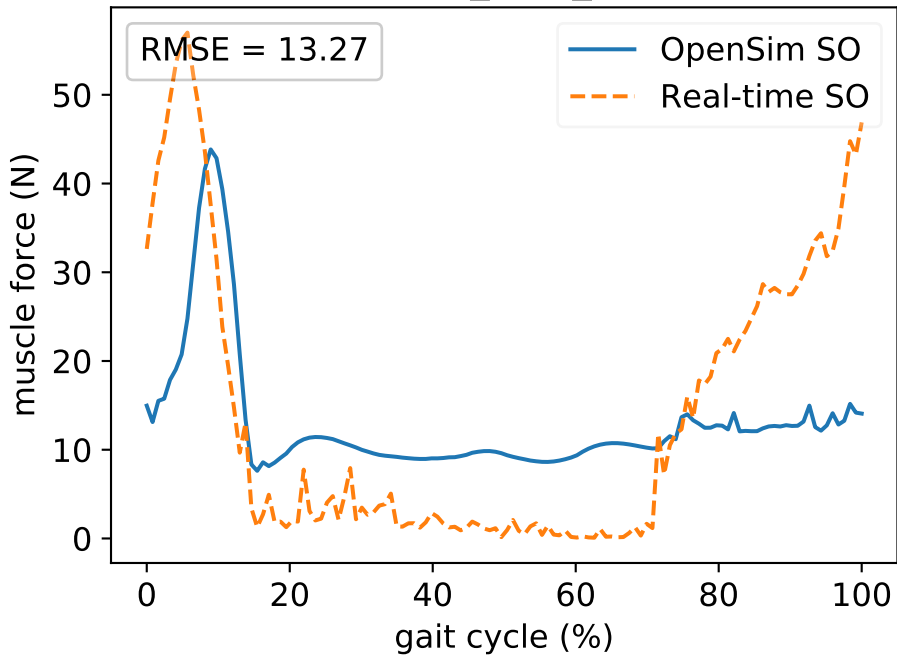

per\_tert\_l

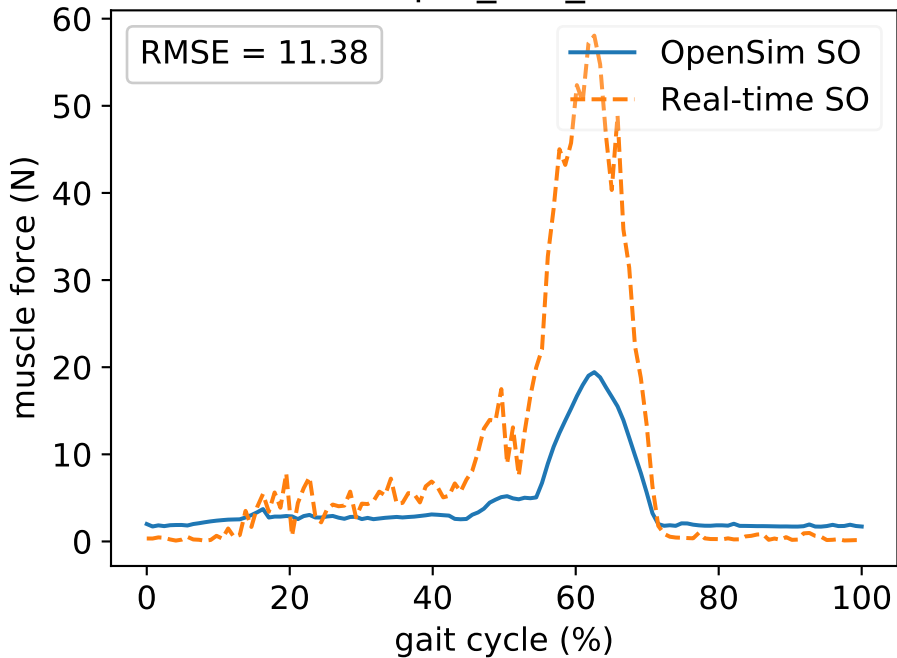

ext\_dig\_l

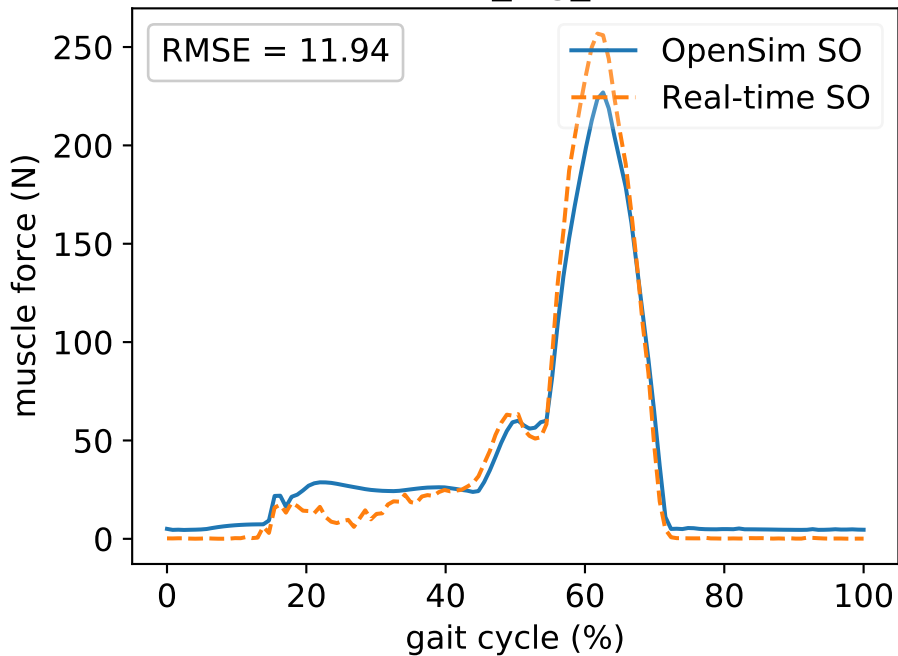

ext\_hal\_l

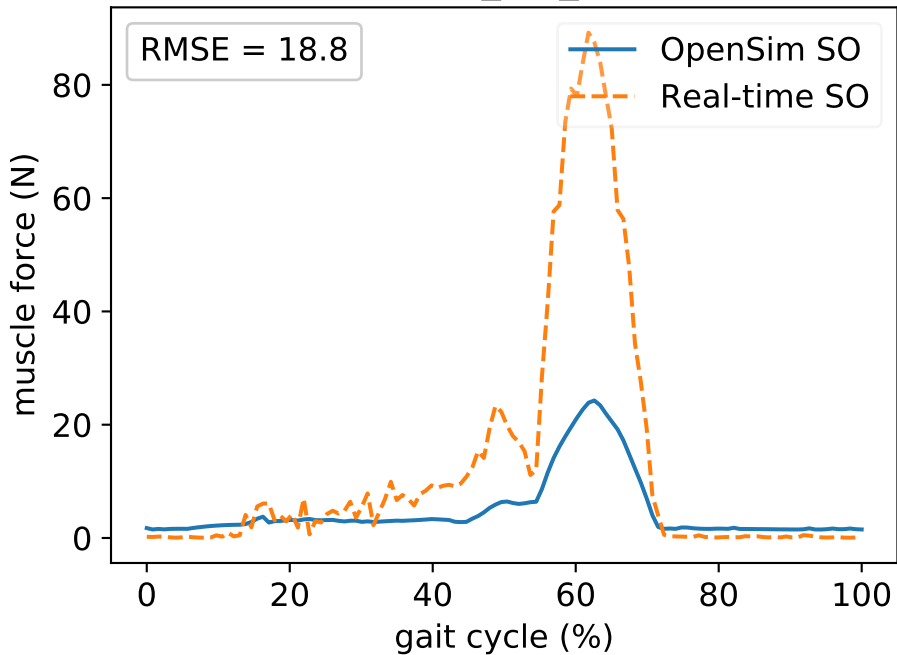

# ercspn\_r

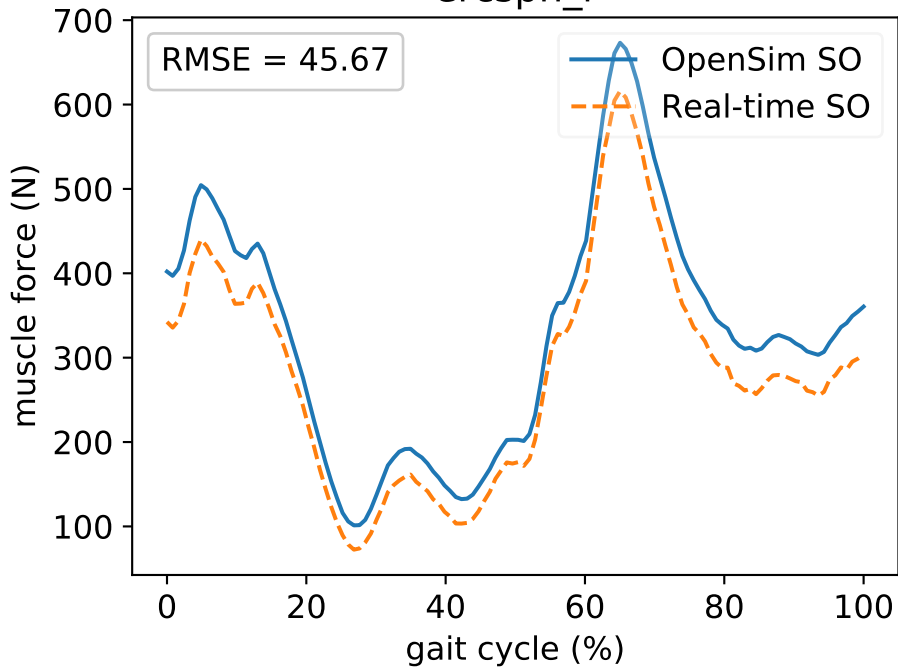

# ercspn\_l

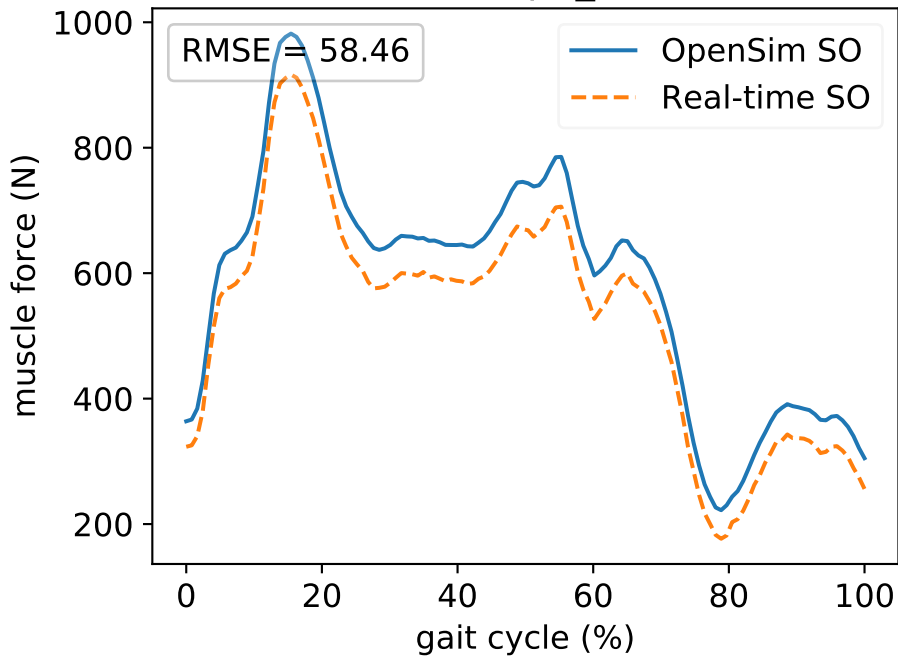



# intobl\_r

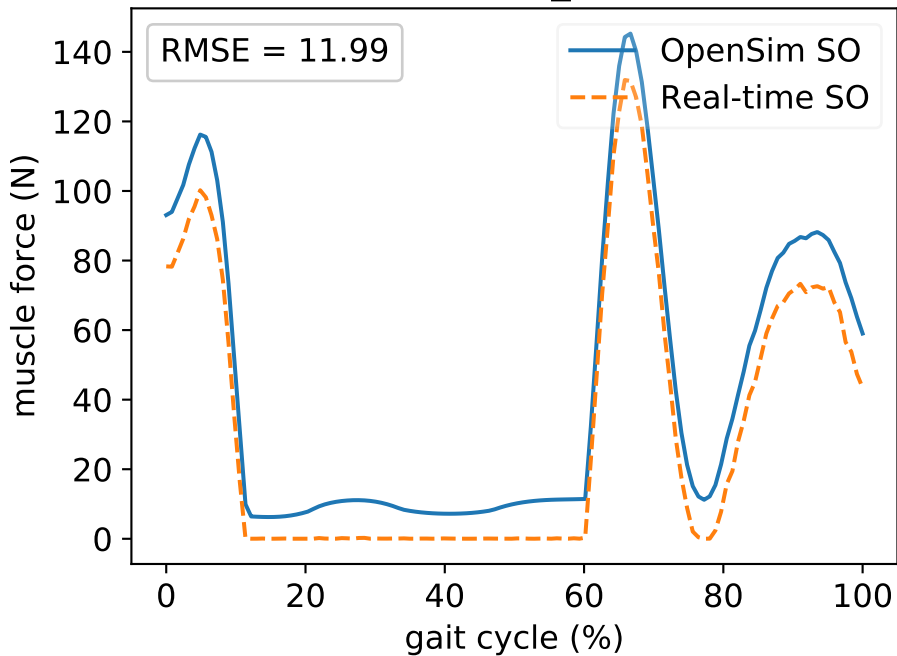

# intobl\_l

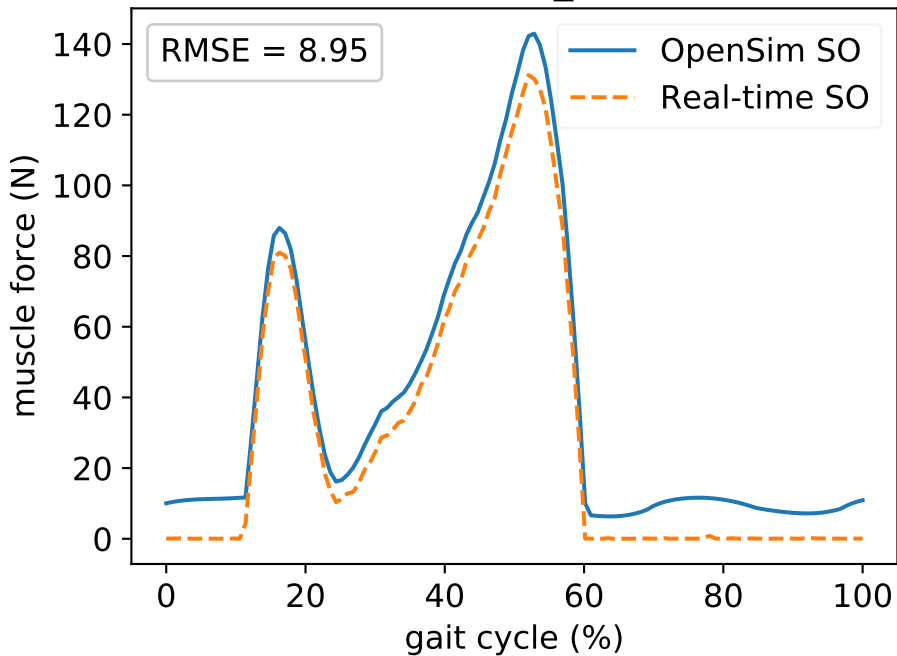

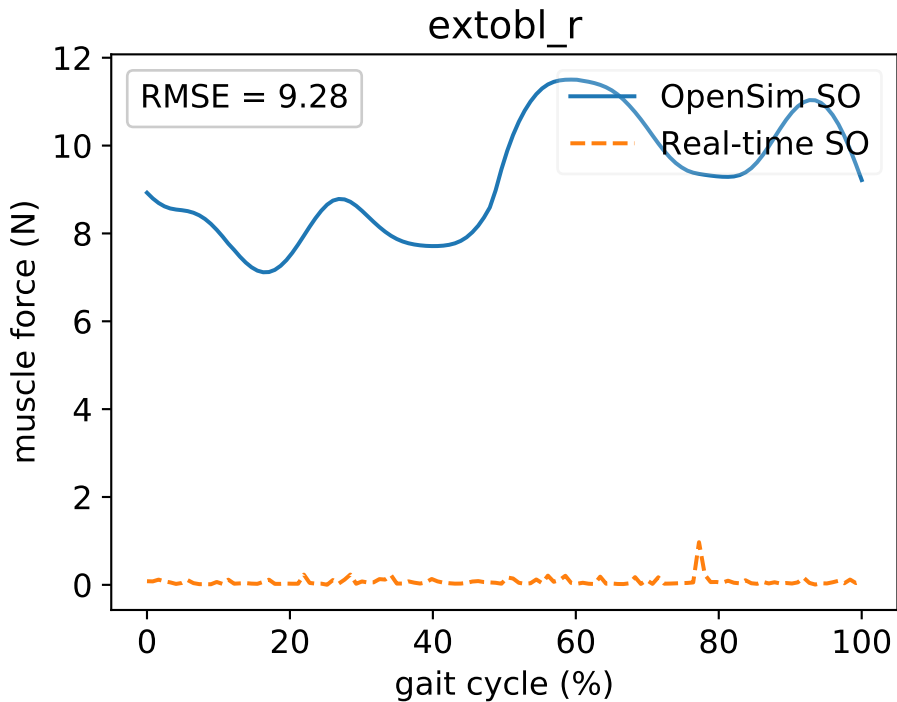

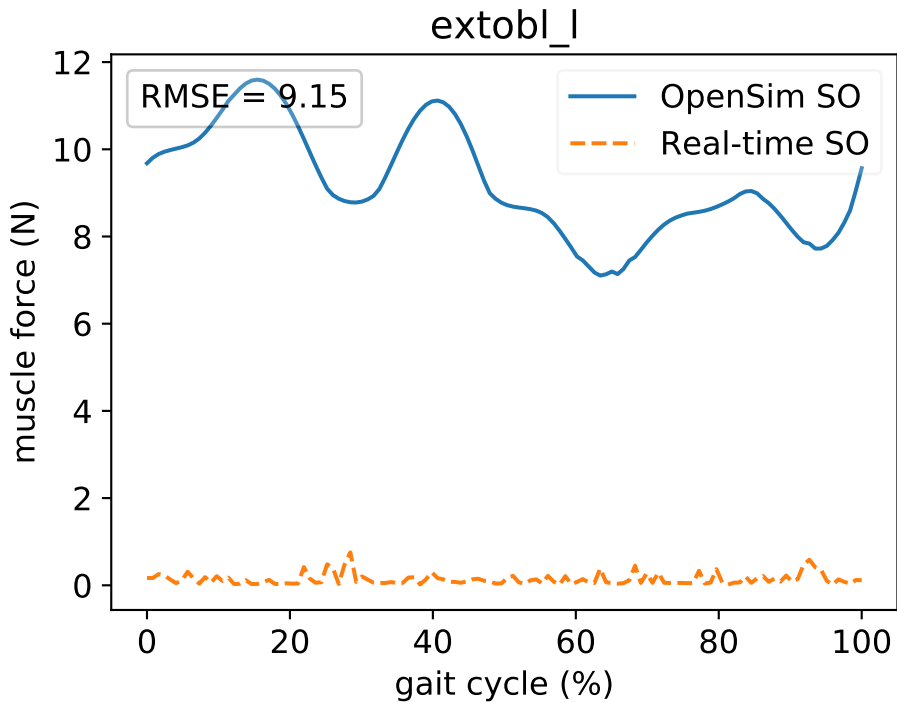

Supplement: Supplementary file 5 [file supplementary]
